# Supplementary material for: A scalable computational framework for predicting gene expression from candidate cis -regulatory elements
Source: HighWire-hosted journal article supplement (doi:10.1101/gr.281219.125), 2026-01-16
Supplement: Supplemental_Fig_S1.pdf [file Supplemental_Fig_S1.pdf]

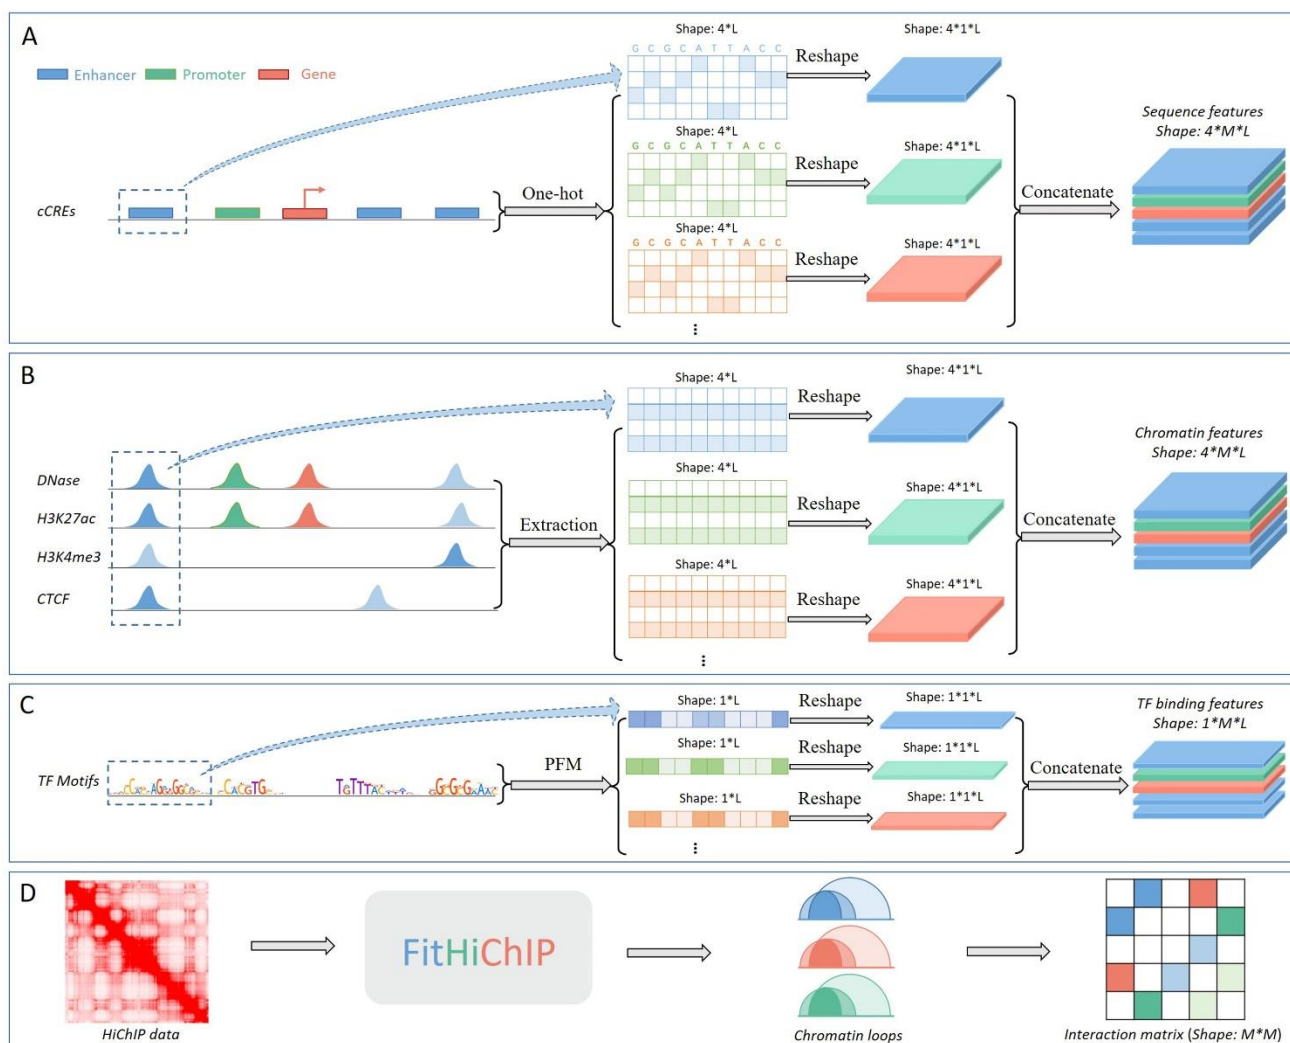

**Supplemental Fig S1: Details of data construction.** (A) The process of constructing sequence features: i) a gene and its surrounding cCREs were extracted, where each sequence was transformed into a matrix of shape  $4 \times L$  using the *one-hot* encoding method and then reshaped into a matrix of shape  $4 \times 1 \times L$ . Here, 4 means the number of nucleotides [A, C, G, T]; ii) all matrices of shape  $4 \times 1 \times L$  were concatenated along with the second dimension to form a matrix of shape  $4 \times M \times L$ . (B) The process of constructing chromatin features: i) the epigenomic signals of a gene and its surrounding cCREs were extracted using the *pyBigWig* software and scaled by the  $\log_{10}(1+x)$  function, where each region was assembled into a matrix of shape  $4 \times L$  and then reshaped into a matrix of shape  $4 \times 1 \times L$ . Here, 4 means the number of epigenomic datasets (DNase, H3K27ac, H3K4me3, and CTCF); ii) all matrices of shape  $4 \times 1 \times L$  were concatenated along with the second dimension to form a matrix of shape  $4 \times M \times L$ . (C) The process of constructing TF binding features: i) a total of  $L$  TF motifs was used to calculate TF binding scores for each cCRE, resulting in a matrix of shape  $1 \times L$ , which was then normalized to a range of 0 to 1 and reshaped into a matrix of shape  $1 \times 1 \times L$ ; ii) all matrices of shape  $1 \times 1 \times L$  were concatenated along with the second dimension to form a matrix of shape  $4 \times M \times L$ . (D) The process of constructing chromatin loops: i) some significant chromatin loops were identified from H3k27ac HiChIP data by using FitHiChIP; ii) If there exist interactions between cCREs and cCREs, as well as between genes and cCREs in chromatin loops, the normalized counts of chromatin loops were calculated and scaled by the  $\log_{10}(1+x)$  function, otherwise 0. As a result, for each gene and its surrounding cCREs, an interaction matrix of shape  $M \times M$  was constructed. Note that  $L$  denotes the length of sequences or the number of TF motifs,  $M$  is equal to  $m+1$  where  $m$  denotes the number of cCREs.
