# Supplementary material for: A scalable computational framework for predicting gene expression from candidate cis -regulatory elements
Source: HighWire-hosted journal article supplement (doi:10.1101/gr.281219.125), 2026-01-16
Supplement: Supplemental_Fig_S3.pdf [file Supplemental_Fig_S3.pdf]

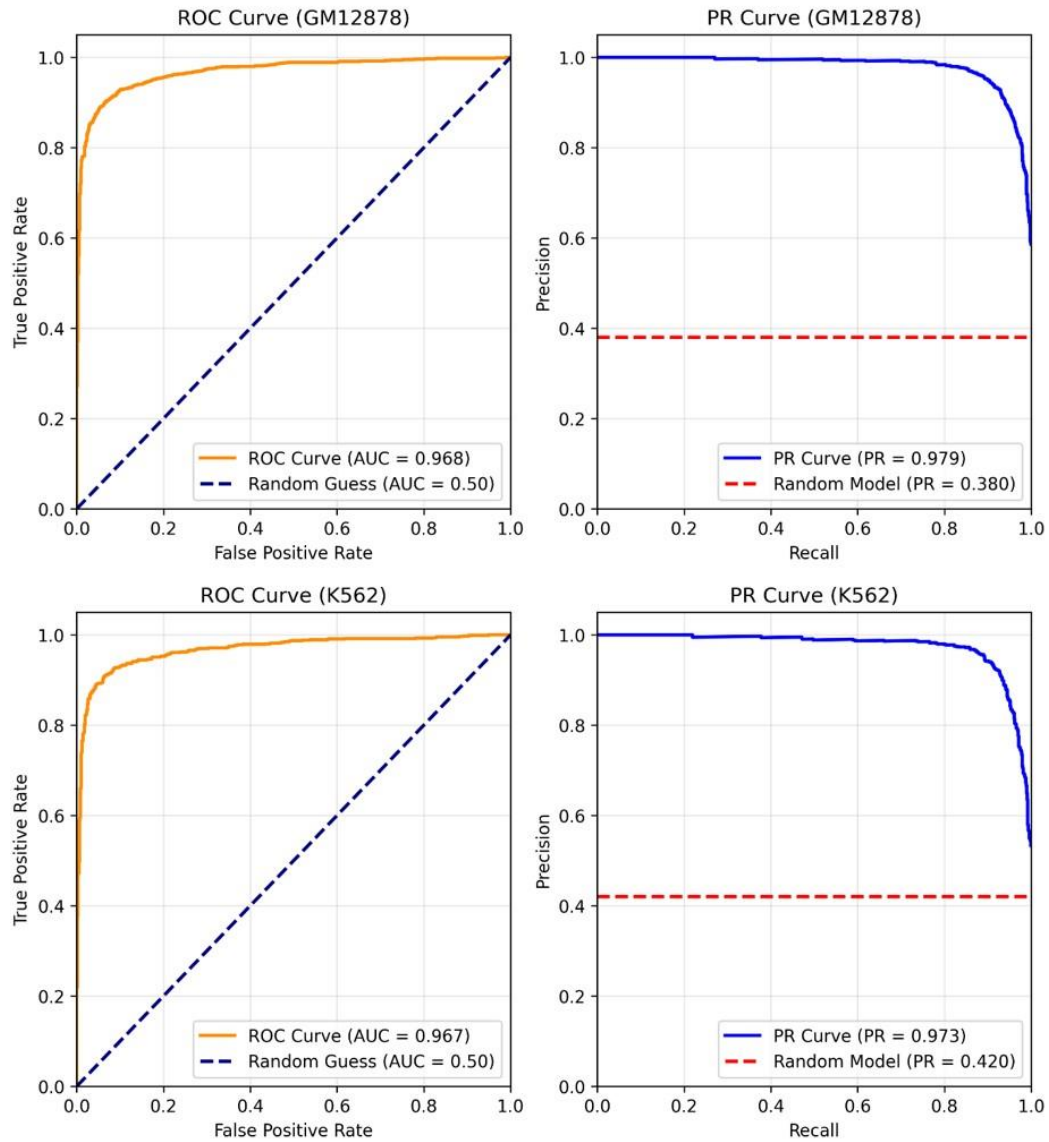

**Supplemental Fig S3: The classification performance of ScPGE.** The performance was evaluated by the AUC and PRAUC metrics. The random model for AUC was set to 0.5, and the random model for PRAUC was calculated as follows: No. of positive samples / No. of negative samples.
