# Supplementary material for: A scalable computational framework for predicting gene expression from candidate cis -regulatory elements
Source: HighWire-hosted journal article supplement (doi:10.1101/gr.281219.125), 2026-01-16
Supplement: Supplemental_Fig_S4.pdf [file Supplemental_Fig_S4.pdf]

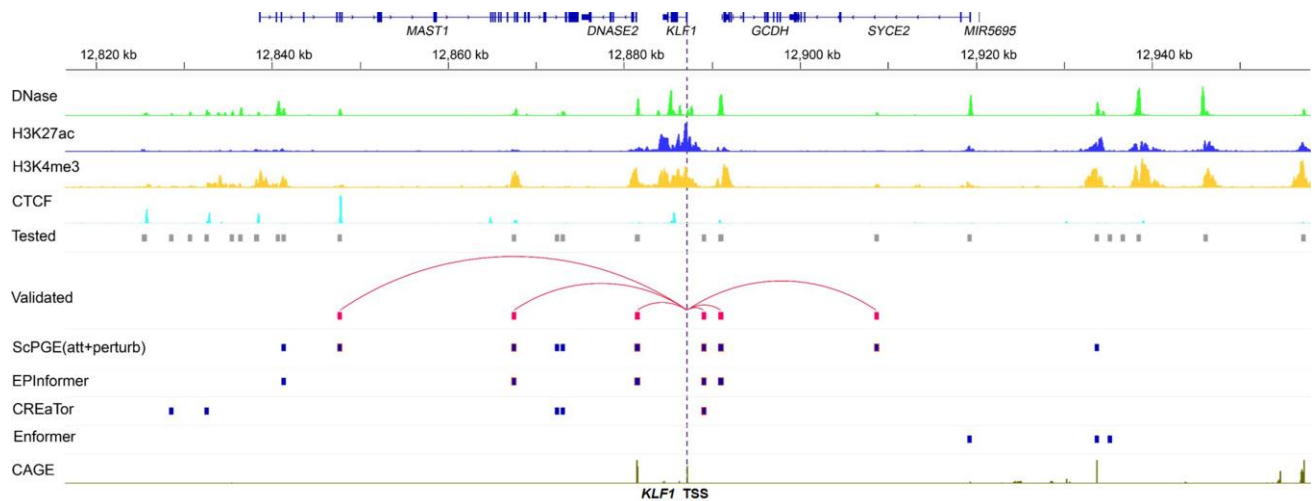

**Supplemental Fig S4: Visualization of active cCREs of the JUNB gene.** These cCREs were prioritized by ScPGE (attention+perturbation), EPIformer, CREaTor, and Enformer, where validated cCREs are represented by red squares and correctly identified cCREs are represented by red boxes.
