# Supplementary material for: A scalable computational framework for predicting gene expression from candidate cis -regulatory elements
Source: HighWire-hosted journal article supplement (doi:10.1101/gr.281219.125), 2026-01-16
Supplement: Supplemental_Fig_S6.pdf [file Supplemental_Fig_S6.pdf]

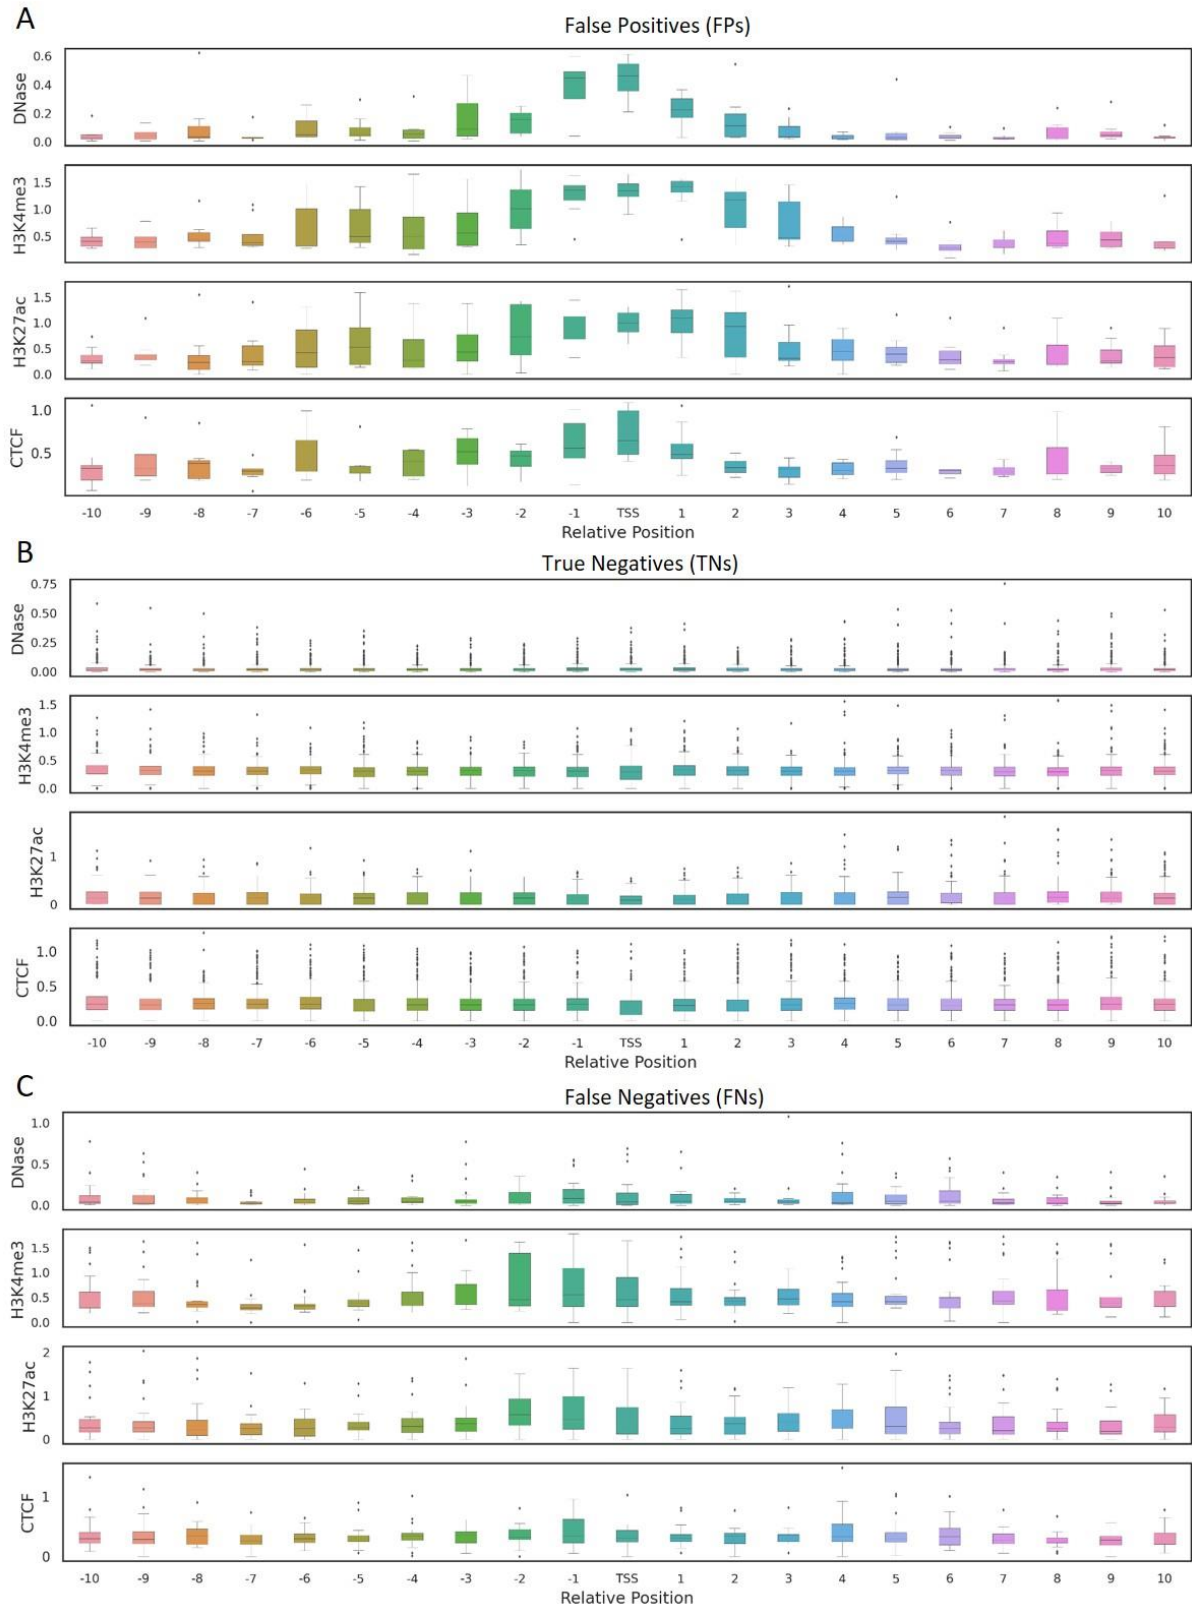

**Supplemental Fig S6: Different patterns found in false positives (FPs), true negatives (TNs), and false negatives (FNs) of K562.** (A) a pattern similar to TPs in which the distribution of four chromatin signals follow a normal distribution was found in FPs. (B) a linear distribution of the four chromatin signals, with DNase and H3K27ac signals close to zero, was found in TNs. (C) a linear distribution of the chromatin signals, with DNase signals close to zero, was found in FNs.
