# Supplementary material for: A scalable computational framework for predicting gene expression from candidate cis -regulatory elements
Source: HighWire-hosted journal article supplement (doi:10.1101/gr.281219.125), 2026-01-16
Supplement: Supplemental_Fig_S7.pdf [file Supplemental_Fig_S7.pdf]

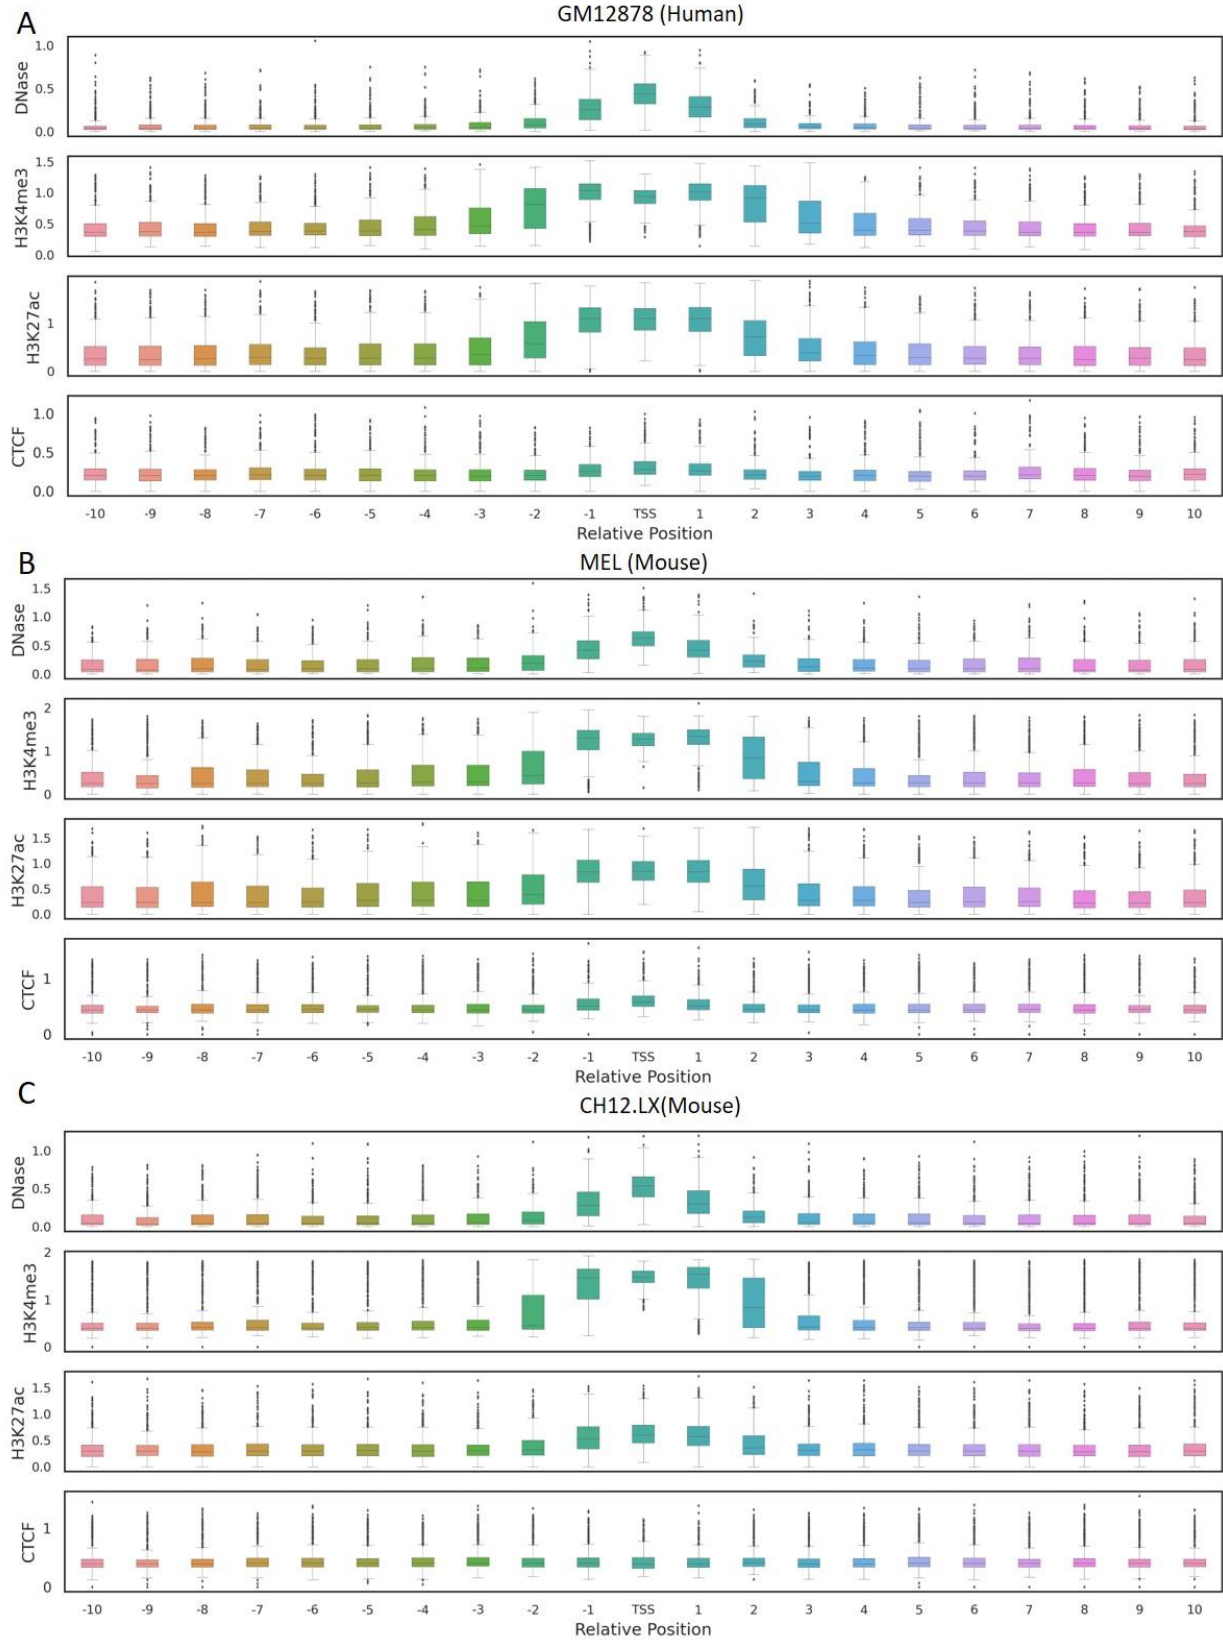

**Supplemental Fig S7: Similar patterns found in true positives of different cell types or species.** (A) a pattern that the intensity of the chromatin signals decreases with distance was found in true positives of GM12878 (Human). (B) a pattern that the intensity of the chromatin signals decreases with distance was found in true positives of MEL (Mouse). (C) a pattern that the intensity of the chromatin signals decreases with distance was found in true positives of CH12.LX (Mouse).
