# Supplementary material for: A scalable computational framework for predicting gene expression from candidate cis -regulatory elements
Source: HighWire-hosted journal article supplement (doi:10.1101/gr.281219.125), 2026-01-16
Supplement: Supplemental_Fig_S8.pdf [file Supplemental_Fig_S8.pdf]

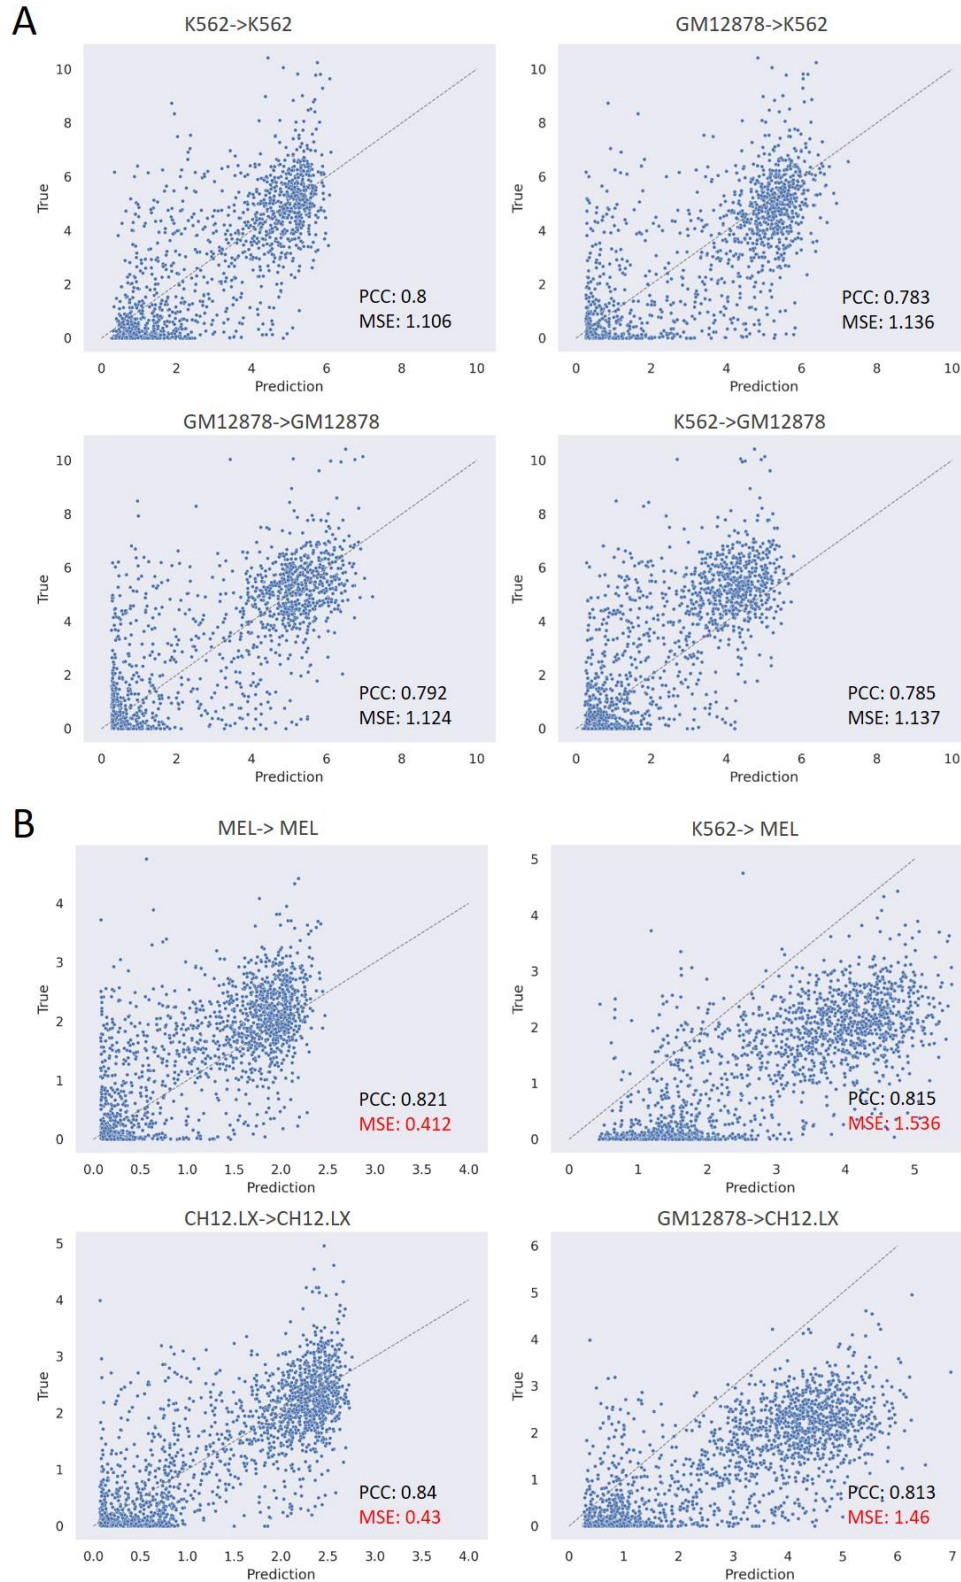

**Supplemental Fig S8: Cross-cell type or cross-species predictive performance of ScPGE.** (A) The predictive performance of ScPGE when or across cell type, where GM12878->GM12878 indicates using a model trained on GM12878 data to predict GM12878 data while K562->GM12878 indicates using a model trained on K562 data to predict GM12878 data. (B) The predictive performance of ScPGE when or across species, where MEL->MEL indicates using a model trained on MEL data (Mouse) to predict MEL data (Mouse) while K562->MEL indicates using a model trained on K562 data (Human) to predict MEL data (Mouse).
