# Supplementary material for: A scalable computational framework for predicting gene expression from candidate cis -regulatory elements
Source: HighWire-hosted journal article supplement (doi:10.1101/gr.281219.125), 2026-01-16
Supplement: Supplemental_Fig_S9.pdf [file Supplemental_Fig_S9.pdf]

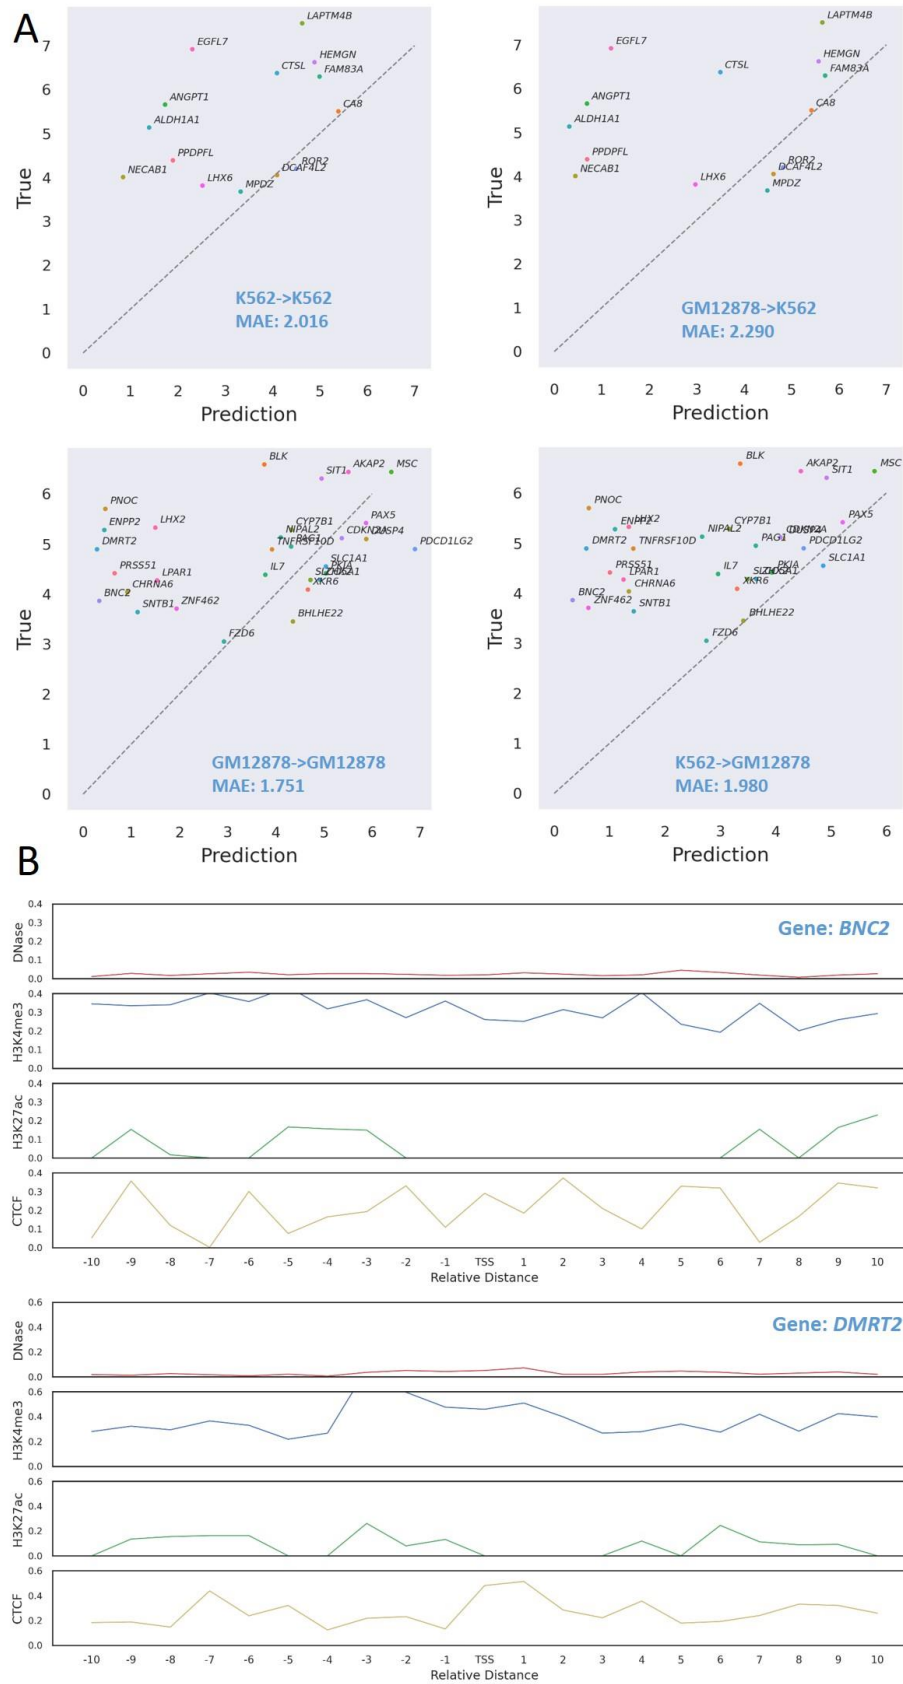

**Supplemental Fig S9: Prediction of cell-type-specific genes.** (A) The performance of ScPGE for predicting cell-type-specific genes was evaluated by the MAE metric. (B) The epigenomic signal distributions of two mispredicted genes: *BNC2* and *DMRT2*.
