# Supplementary material for: A scalable computational framework for predicting gene expression from candidate cis -regulatory elements
Source: HighWire-hosted journal article supplement (doi:10.1101/gr.281219.125), 2026-01-16
Supplement: Supplemental_Fig_S10.pdf [file Supplemental_Fig_S10.pdf]

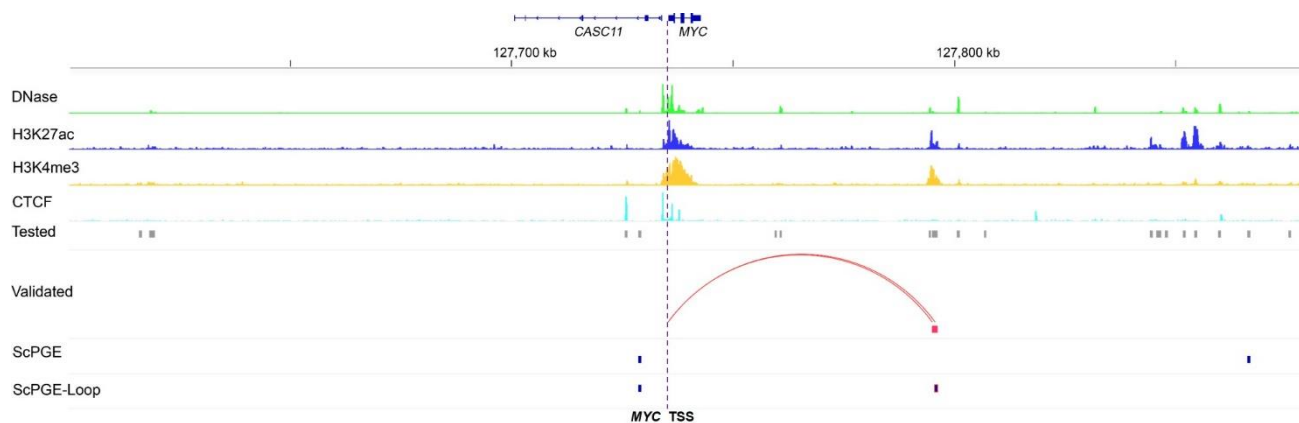

**Supplemental Fig S10: Visualization of active cCREs of the *MYC* gene.** These cCREs were missed by ScPGE but identified by ScPGE-Loop, where validated cCREs are represented by red squares and correctly identified cCREs are represented by red boxes.
