# Supplementary material for: A scalable computational framework for predicting gene expression from candidate cis -regulatory elements
Source: HighWire-hosted journal article supplement (doi:10.1101/gr.281219.125), 2026-01-16
Supplement: Supplemental_Fig_S11.pdf [file Supplemental_Fig_S11.pdf]

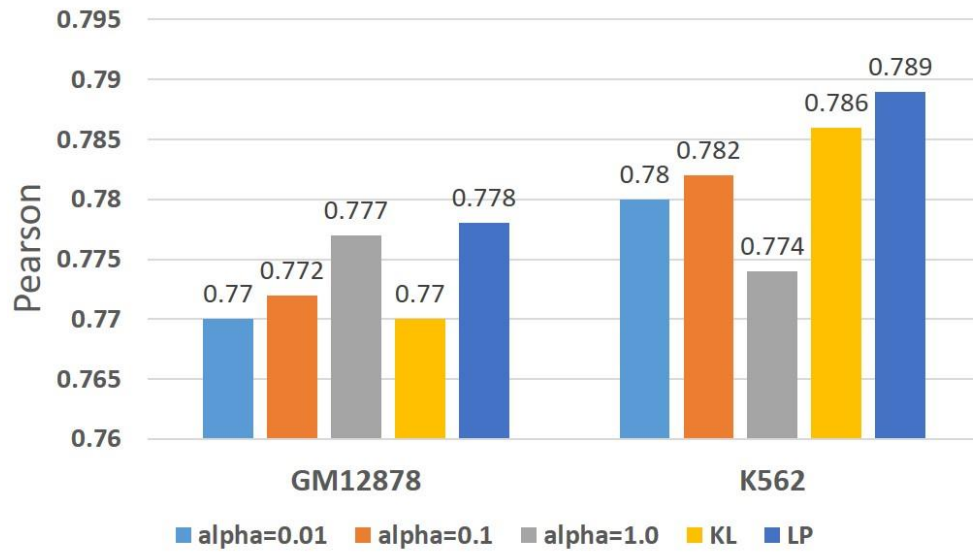

**Supplemental Fig S11: The performance comparison of the combined methods under different alpha.** The performance was evaluated by the Pearson correlation metric by comparing the combined methods with ScPGE-LP and ScPGE-KL.
