# Supplementary material for: A scalable computational framework for predicting gene expression from candidate cis -regulatory elements
Source: HighWire-hosted journal article supplement (doi:10.1101/gr.281219.125), 2026-01-16
Supplement: Supplemental_Fig_S12.pdf [file Supplemental_Fig_S12.pdf]

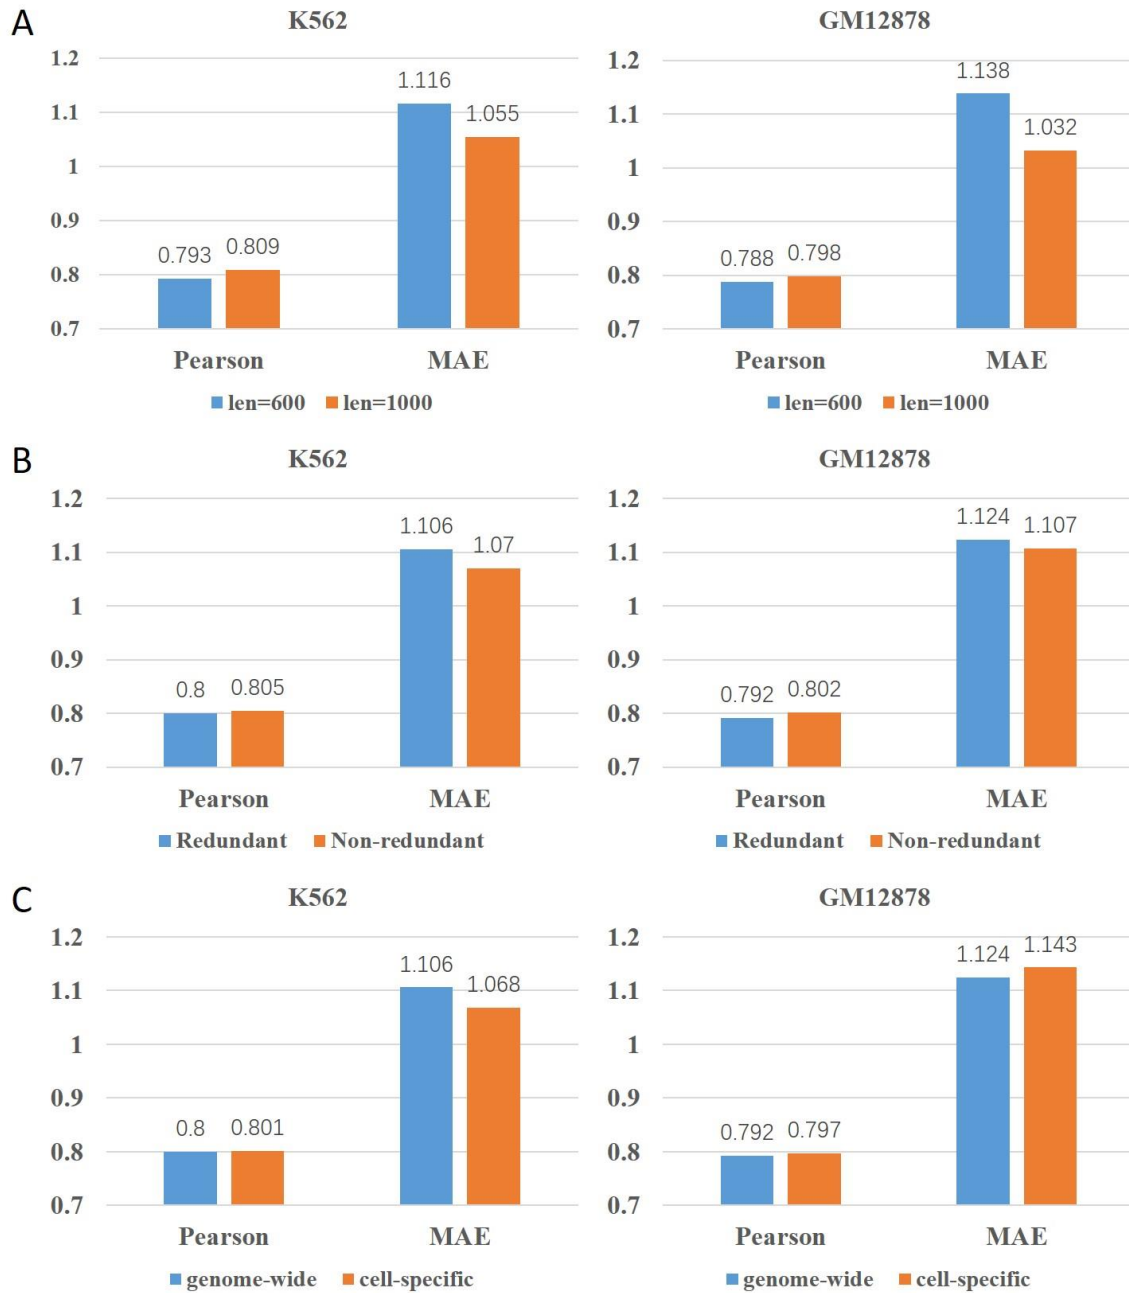

**Supplemental Fig S12: The performance of ScPGE using several key hyper-parameters—such as DNA sequence length, non-redundant TF motifs, and cell-specific cCREs.** (A) The performance comparison of ScPGE using different sequence lengths. (B) The performance comparison of ScPGE using redundant or non-redundant TF motifs. (C) The performance comparison of ScPGE using genome-wide or cell-specific cCREs.
