# Supplementary material for: A scalable computational framework for predicting gene expression from candidate cis -regulatory elements
Source: HighWire-hosted journal article supplement (doi:10.1101/gr.281219.125), 2026-01-16
Supplement: Supplemental_Table_S1.docx [file Supplemental_Table_S1.docx]

**Supplemental Table S1. Comparison of model complexity from different perspectives**

| Methods | Training time (s) | Inference time (s) | Flops (Mb) | Params (Mb) |
| --- | --- | --- | --- | --- |
| Enformer | 1.34 | 0.4 | 24834102 | 481 |
| CREaTor | 0.21 | 0.127 | 12210 | 5.1 |
| EPInformer | 0.044 | 0.02 | 34038 | 0.73 |
| ScPGE | 0.029 | 0.011 | 9387 | 4.1 |

Note: we evaluated the model complexity from four perspectives, including the training/inference time, number of flops, and number of parameters. For calculating the training/inference time, we set batch size to 4 and repeated each experiment 100 times, ultimately using the average as the training/inference time.
