# Supplementary material for: A scalable computational framework for predicting gene expression from candidate cis -regulatory elements
Source: HighWire-hosted journal article supplement (doi:10.1101/gr.281219.125), 2026-01-16
Supplement: Supplemental_Table_S2.xlsx [file Supplemental_Table_S2.xlsx]

## Sheet: Supplemental_Table_S2
Summary of human data from different cell types/lines in this study
File accession	File format	Output type	Experiment accession	Assay	Biosample term name	Biosample type	Experiment target	Library size range	Biological replicate(s)	Technical replicate(s)
ENCFF781RJW	tsv	transcript quantifications	ENCSR558SEE	total RNA-seq	A673	cell line			2	2_1
ENCFF898FKI	tsv	transcript quantifications	ENCSR558SEE	total RNA-seq	A673	cell line			1	1_1
ENCFF814ZWE	tsv	transcript quantifications	ENCSR558SEE	total RNA-seq	A673	cell line			2	2_1
ENCFF199FVF	tsv	transcript quantifications	ENCSR558SEE	total RNA-seq	A673	cell line			1	1_1
ENCFF816IIS	bigWig	read-depth normalized signal	ENCSR346JWH	DNase-seq	A673	cell line			1	1_1
ENCFF854FEY	bigWig	read-depth normalized signal	ENCSR346JWH	DNase-seq	A673	cell line			2	2_1
ENCFF052IDF	bigWig	fold change over control	ENCSR714TJD	Histone ChIP-seq	A673	cell line	H3K27ac-human	200-600	1	1_1
ENCFF331LHH	bigWig	fold change over control	ENCSR714TJD	Histone ChIP-seq	A673	cell line	H3K27ac-human	200-600	2	2_1
ENCFF213BSP	bigWig	fold change over control	ENCSR714TJD	Histone ChIP-seq	A673	cell line	H3K27ac-human	200-600	1, 2	1_1, 2_1
ENCFF448MXP	bigWig	fold change over control	ENCSR435FGK	Histone ChIP-seq	A673	cell line	H3K4me3-human	200-600	1	1_1
ENCFF958CFK	bigWig	fold change over control	ENCSR435FGK	Histone ChIP-seq	A673	cell line	H3K4me3-human	200-600	1, 2	1_1, 2_1
ENCFF742MPS	bigWig	fold change over control	ENCSR435FGK	Histone ChIP-seq	A673	cell line	H3K4me3-human	200-600	2	2_1
ENCFF146LTQ	bigWig	fold change over control	ENCSR611JJS	TF ChIP-seq	A673	cell line	CTCF-human	300-800, 200-600	1	1_1
ENCFF864KEM	bigWig	fold change over control	ENCSR611JJS	TF ChIP-seq	A673	cell line	CTCF-human	300-800, 200-600	2	2_1
ENCFF070LLG	bigWig	fold change over control	ENCSR611JJS	TF ChIP-seq	A673	cell line	CTCF-human	300-800, 200-600	1, 2	1_1, 2_1
ENCFF203WRP	tsv	transcript quantifications	ENCSR233IJT	total RNA-seq	astrocyte	primary cell		>200	1	1_1
ENCFF771DZG	tsv	transcript quantifications	ENCSR233IJT	total RNA-seq	astrocyte	primary cell		>200	2	2_1
ENCFF927CZM	tsv	transcript quantifications	ENCSR233IJT	total RNA-seq	astrocyte	primary cell		>200	2	2_1
ENCFF761KDQ	tsv	transcript quantifications	ENCSR233IJT	total RNA-seq	astrocyte	primary cell		>200	1	1_1
ENCFF963PFR	bigWig	read-depth normalized signal	ENCSR000EPM	DNase-seq	astrocyte	primary cell			1	1_1
ENCFF908ZDO	bigWig	read-depth normalized signal	ENCSR000EPM	DNase-seq	astrocyte	primary cell			2	2_1
ENCFF643ZMC	bigWig	fold change over control	ENCSR000AOQ	Histone ChIP-seq	astrocyte	primary cell	H3K27ac-human		1, 2	1_1, 2_1
ENCFF245XQY	bigWig	fold change over control	ENCSR000AOQ	Histone ChIP-seq	astrocyte	primary cell	H3K27ac-human		2	2_1
ENCFF627YWW	bigWig	fold change over control	ENCSR000AOQ	Histone ChIP-seq	astrocyte	primary cell	H3K27ac-human		1	1_1
ENCFF727VTY	bigWig	fold change over control	ENCSR000AOU	Histone ChIP-seq	astrocyte	primary cell	H3K4me3-human		1	1_1
ENCFF168IXO	bigWig	fold change over control	ENCSR000AOU	Histone ChIP-seq	astrocyte	primary cell	H3K4me3-human		2	2_1
ENCFF577BWJ	bigWig	fold change over control	ENCSR000AOU	Histone ChIP-seq	astrocyte	primary cell	H3K4me3-human		1, 2	1_1, 2_1
ENCFF135TMQ	bigWig	fold change over control	ENCSR000AOO	TF ChIP-seq	astrocyte	primary cell	CTCF-human		1	1_1
ENCFF837HAF	bigWig	fold change over control	ENCSR000AOO	TF ChIP-seq	astrocyte	primary cell	CTCF-human		2	2_1
ENCFF714NPP	bigWig	fold change over control	ENCSR000AOO	TF ChIP-seq	astrocyte	primary cell	CTCF-human		1, 2	1_1, 2_1
ENCFF614VJE	tsv	transcript quantifications	ENCSR000CTV	polyA plus RNA-seq	B cell	primary cell		>200	2	2_1
ENCFF113WEJ	tsv	transcript quantifications	ENCSR000CTV	polyA plus RNA-seq	B cell	primary cell		>200	2	2_1
ENCFF544EQA	tsv	transcript quantifications	ENCSR000CTV	polyA plus RNA-seq	B cell	primary cell		>200	1	1_1
ENCFF268BYA	tsv	transcript quantifications	ENCSR000CTV	polyA plus RNA-seq	B cell	primary cell		>200	1	1_1
ENCFF917JIG	bigWig	fold change over control	ENCSR878JSF	Histone ChIP-seq	B cell	primary cell	H3K4me3-human	200-600	1	1_1, 1_2
ENCFF175WBS	bigWig	fold change over control	ENCSR000AUV	TF ChIP-seq	B cell	primary cell	CTCF-human		1	1_1
ENCFF418EBS	bigWig	fold change over control	ENCSR000AUV	TF ChIP-seq	B cell	primary cell	CTCF-human		2	2_1
ENCFF035DJL	bigWig	fold change over control	ENCSR000AUV	TF ChIP-seq	B cell	primary cell	CTCF-human		1, 2	1_1, 2_1
ENCFF781ZDY	bigWig	fold change over control	ENCSR000AUP	Histone ChIP-seq	B cell	primary cell	H3K27ac-human		1, 2	1_1, 2_1
ENCFF474MNE	bigWig	fold change over control	ENCSR000AUP	Histone ChIP-seq	B cell	primary cell	H3K27ac-human		1	1_1
ENCFF286JPM	bigWig	fold change over control	ENCSR000AUP	Histone ChIP-seq	B cell	primary cell	H3K27ac-human		2	2_1
ENCFF851PJG	bigWig	fold change over control	ENCSR269OVV	Histone ChIP-seq	B cell	primary cell	H3K4me3-human		1	1_1
ENCFF588PNQ	bigWig	fold change over control	ENCSR269OVV	Histone ChIP-seq	B cell	primary cell	H3K4me3-human		2	2_1
ENCFF682CXH	bigWig	fold change over control	ENCSR269OVV	Histone ChIP-seq	B cell	primary cell	H3K4me3-human		1, 2	1_1, 2_1
ENCFF112YXL	bigWig	read-depth normalized signal	ENCSR000EMJ	DNase-seq	B cell	primary cell			2	2_1
ENCFF452URQ	bigWig	read-depth normalized signal	ENCSR000EMJ	DNase-seq	B cell	primary cell			1	1_1
ENCFF807GVN	bigWig	fold change over control	ENCSR939UQD	Histone ChIP-seq	B cell	primary cell	H3K4me3-human		1	1_2
ENCFF134KAD	bigWig	read-depth normalized signal	ENCSR381PXW	DNase-seq	B cell	primary cell			1	1_1, 1_2
ENCFF993MFJ	bigWig	read-depth normalized signal	ENCSR247IUJ	DNase-seq	B cell	primary cell			1	1_2
ENCFF089VAB	bigWig	fold change over control	ENCSR191ZQT	Histone ChIP-seq	B cell	primary cell	H3K27ac-human		1	1_2
ENCFF540YWF	tsv	transcript quantifications	ENCSR023VVO	polyA plus RNA-seq	bipolar neuron	in vitro differentiated cells		>200	1	1_1
ENCFF111UUR	tsv	transcript quantifications	ENCSR023VVO	polyA plus RNA-seq	bipolar neuron	in vitro differentiated cells		>200	2	2_1
ENCFF995EDB	tsv	transcript quantifications	ENCSR968WKR	total RNA-seq	bipolar neuron	in vitro differentiated cells		>200	1	1_1
ENCFF218WPZ	tsv	transcript quantifications	ENCSR968WKR	total RNA-seq	bipolar neuron	in vitro differentiated cells		>200	2	2_1
ENCFF952KRD	tsv	transcript quantifications	ENCSR968WKR	total RNA-seq	bipolar neuron	in vitro differentiated cells		>200	1	1_1
ENCFF114DLF	tsv	transcript quantifications	ENCSR968WKR	total RNA-seq	bipolar neuron	in vitro differentiated cells		>200	2	2_1
ENCFF386FNE	bigWig	read-depth normalized signal	ENCSR626RVD	DNase-seq	bipolar neuron	in vitro differentiated cells			1	1_1
ENCFF928GOH	bigWig	read-depth normalized signal	ENCSR626RVD	DNase-seq	bipolar neuron	in vitro differentiated cells			2	2_1
ENCFF596ZSJ	bigWig	fold change over control	ENCSR066BZZ	TF ChIP-seq	bipolar neuron	in vitro differentiated cells	CTCF-human	200-600	1, 2	1_1, 2_1
ENCFF723ZNV	bigWig	fold change over control	ENCSR066BZZ	TF ChIP-seq	bipolar neuron	in vitro differentiated cells	CTCF-human	200-600	1	1_1
ENCFF294YRB	bigWig	fold change over control	ENCSR066BZZ	TF ChIP-seq	bipolar neuron	in vitro differentiated cells	CTCF-human	200-600	2	2_1
ENCFF788ORL	bigWig	fold change over control	ENCSR066BZZ	TF ChIP-seq	bipolar neuron	in vitro differentiated cells	CTCF-human	200-600	1	1_1
ENCFF145UJA	bigWig	fold change over control	ENCSR066BZZ	TF ChIP-seq	bipolar neuron	in vitro differentiated cells	CTCF-human	200-600	2	2_1
ENCFF815AAU	bigWig	fold change over control	ENCSR066BZZ	TF ChIP-seq	bipolar neuron	in vitro differentiated cells	CTCF-human	200-600	1, 2	1_1, 2_1
ENCFF435NQW	bigWig	fold change over control	ENCSR905TYC	Histone ChIP-seq	bipolar neuron	in vitro differentiated cells	H3K27ac-human	200-600	1, 2	1_1, 2_1
ENCFF265AKD	bigWig	fold change over control	ENCSR905TYC	Histone ChIP-seq	bipolar neuron	in vitro differentiated cells	H3K27ac-human	200-600	1	1_1
ENCFF372KXN	bigWig	fold change over control	ENCSR905TYC	Histone ChIP-seq	bipolar neuron	in vitro differentiated cells	H3K27ac-human	200-600	2	2_1
ENCFF192EVW	bigWig	fold change over control	ENCSR849YFO	Histone ChIP-seq	bipolar neuron	in vitro differentiated cells	H3K4me3-human	200-600	1	1_1
ENCFF167RAV	bigWig	fold change over control	ENCSR849YFO	Histone ChIP-seq	bipolar neuron	in vitro differentiated cells	H3K4me3-human	200-600	2	2_1
ENCFF768NPJ	bigWig	fold change over control	ENCSR849YFO	Histone ChIP-seq	bipolar neuron	in vitro differentiated cells	H3K4me3-human	200-600	1, 2	1_1, 2_1
ENCFF950RGT	tsv	transcript quantifications	ENCSR000CUC	polyA plus RNA-seq	CD14-positive monocyte	primary cell		>200	1	1_1
ENCFF737DWM	tsv	transcript quantifications	ENCSR000CUC	polyA plus RNA-seq	CD14-positive monocyte	primary cell		>200	2	2_1
ENCFF553EXB	tsv	transcript quantifications	ENCSR000CUC	polyA plus RNA-seq	CD14-positive monocyte	primary cell		>200	1	1_1
ENCFF477OSF	tsv	transcript quantifications	ENCSR000CUC	polyA plus RNA-seq	CD14-positive monocyte	primary cell		>200	2	2_1
ENCFF587XGD	bigWig	fold change over control	ENCSR000ASN	Histone ChIP-seq	CD14-positive monocyte	primary cell	H3K4me3-human	200-600	1, 2	1_1, 1_2, 2_1
ENCFF367ZHA	bigWig	fold change over control	ENCSR000ASN	Histone ChIP-seq	CD14-positive monocyte	primary cell	H3K4me3-human	200-600	2	2_1
ENCFF439PJT	bigWig	fold change over control	ENCSR000ASN	Histone ChIP-seq	CD14-positive monocyte	primary cell	H3K4me3-human	200-600	1	1_1, 1_2
ENCFF302MMA	bigWig	fold change over control	ENCSR000ATN	TF ChIP-seq	CD14-positive monocyte	primary cell	CTCF-human		1	1_1
ENCFF271KMB	bigWig	fold change over control	ENCSR000ATN	TF ChIP-seq	CD14-positive monocyte	primary cell	CTCF-human		2	2_1
ENCFF496PSJ	bigWig	fold change over control	ENCSR000ATN	TF ChIP-seq	CD14-positive monocyte	primary cell	CTCF-human		1, 2	1_1, 2_1
ENCFF389PZY	bigWig	read-depth normalized signal	ENCSR000EPK	DNase-seq	CD14-positive monocyte	primary cell			2	2_1
ENCFF123VGW	bigWig	read-depth normalized signal	ENCSR674JIL	DNase-seq	CD14-positive monocyte	primary cell			1	1_1
ENCFF078DZN	bigWig	fold change over control	ENCSR000ASJ	Histone ChIP-seq	CD14-positive monocyte	primary cell	H3K27ac-human		2	2_1
ENCFF948MET	bigWig	fold change over control	ENCSR000ASJ	Histone ChIP-seq	CD14-positive monocyte	primary cell	H3K27ac-human		1	1_1
ENCFF184NWF	bigWig	fold change over control	ENCSR000ASJ	Histone ChIP-seq	CD14-positive monocyte	primary cell	H3K27ac-human		1, 2	1_1, 2_1
ENCFF739LQS	bigWig	fold change over control	ENCSR796FCS	Histone ChIP-seq	CD14-positive monocyte	primary cell	H3K4me3-human		1	1_2
ENCFF116NCG	bigWig	fold change over control	ENCSR012PII	Histone ChIP-seq	CD14-positive monocyte	primary cell	H3K27ac-human		1	1_2
ENCFF353UAY	bigWig	read-depth normalized signal	ENCSR695AUY	DNase-seq	CD14-positive monocyte	primary cell			1	1_1
ENCFF086OJK	tsv	transcript quantifications	ENCSR000CUH	total RNA-seq	fibroblast of dermis	primary cell		>200	2	2_1
ENCFF371RTQ	tsv	transcript quantifications	ENCSR000CUH	total RNA-seq	fibroblast of dermis	primary cell		>200	1	1_1
ENCFF283GYJ	tsv	transcript quantifications	ENCSR000CUH	total RNA-seq	fibroblast of dermis	primary cell		>200	1	1_1
ENCFF337IWP	tsv	transcript quantifications	ENCSR000CUH	total RNA-seq	fibroblast of dermis	primary cell		>200	2	2_1
ENCFF466ZZY	bigWig	read-depth normalized signal	ENCSR000EPO	DNase-seq	fibroblast of dermis	primary cell			2	2_1
ENCFF361BTT	bigWig	read-depth normalized signal	ENCSR000EPO	DNase-seq	fibroblast of dermis	primary cell			1	1_1
ENCFF317VTJ	bigWig	fold change over control	ENCSR000APR	Histone ChIP-seq	fibroblast of dermis	primary cell	H3K4me3-human	200-600	2	2_1
ENCFF529WWT	bigWig	fold change over control	ENCSR000APR	Histone ChIP-seq	fibroblast of dermis	primary cell	H3K4me3-human	200-600	1	1_1
ENCFF125WTJ	bigWig	fold change over control	ENCSR000APR	Histone ChIP-seq	fibroblast of dermis	primary cell	H3K4me3-human	200-600	1, 2	1_1, 2_1
ENCFF254VOR	bigWig	fold change over control	ENCSR000APN	Histone ChIP-seq	fibroblast of dermis	primary cell	H3K27ac-human		2	2_1
ENCFF411OBU	bigWig	fold change over control	ENCSR000APN	Histone ChIP-seq	fibroblast of dermis	primary cell	H3K27ac-human		1	1_1
ENCFF500IPG	bigWig	fold change over control	ENCSR000APN	Histone ChIP-seq	fibroblast of dermis	primary cell	H3K27ac-human		1, 2	1_1, 2_1
ENCFF720GFK	bigWig	fold change over control	ENCSR000APM	TF ChIP-seq	fibroblast of dermis	primary cell	CTCF-human		1, 2	1_1, 2_1
ENCFF231WLH	bigWig	fold change over control	ENCSR000APM	TF ChIP-seq	fibroblast of dermis	primary cell	CTCF-human		1	1_1
ENCFF316KBU	bigWig	fold change over control	ENCSR000APM	TF ChIP-seq	fibroblast of dermis	primary cell	CTCF-human		2	2_1
ENCFF461CEJ	tsv	transcript quantifications	ENCSR000COQ	polyA plus RNA-seq	GM12878	cell line		>200	1	1_1
ENCFF891RHZ	tsv	transcript quantifications	ENCSR000COQ	polyA plus RNA-seq	GM12878	cell line		>200	2	2_1
ENCFF150FKV	tsv	transcript quantifications	ENCSR000COQ	polyA plus RNA-seq	GM12878	cell line		>200	2	2_1
ENCFF201ROL	tsv	transcript quantifications	ENCSR000COQ	polyA plus RNA-seq	GM12878	cell line		>200	1	1_1
ENCFF768RJJ	tsv	transcript quantifications	ENCSR000AEE	total RNA-seq	GM12878	cell line		>200	1	1_1
ENCFF907ZEE	tsv	transcript quantifications	ENCSR000AEE	total RNA-seq	GM12878	cell line		>200	2	2_1
ENCFF817VBW	tsv	transcript quantifications	ENCSR000AEE	total RNA-seq	GM12878	cell line		>200	2	2_1
ENCFF204RYI	tsv	transcript quantifications	ENCSR000AEE	total RNA-seq	GM12878	cell line		>200	1	1_1
ENCFF783CHM	tsv	transcript quantifications	ENCSR000AED	polyA plus RNA-seq	GM12878	cell line		>200	1	1_1
ENCFF485OUK	tsv	transcript quantifications	ENCSR000AED	polyA plus RNA-seq	GM12878	cell line		>200	2	2_1
ENCFF673WNZ	tsv	transcript quantifications	ENCSR000AED	polyA plus RNA-seq	GM12878	cell line		>200	1	1_1
ENCFF741PAY	tsv	transcript quantifications	ENCSR000AED	polyA plus RNA-seq	GM12878	cell line		>200	2	2_1
ENCFF874RRW	bigWig	fold change over control	ENCSR000AKA	Histone ChIP-seq	GM12878	cell line	H3K4me3-human		2	2_1
ENCFF346GYG	bigWig	fold change over control	ENCSR000AKA	Histone ChIP-seq	GM12878	cell line	H3K4me3-human		1	1_1
ENCFF927KAJ	bigWig	fold change over control	ENCSR000AKA	Histone ChIP-seq	GM12878	cell line	H3K4me3-human		1, 2	1_1, 2_1
ENCFF736DCK	bigWig	fold change over control	ENCSR057BWO	Histone ChIP-seq	GM12878	cell line	H3K4me3-human	200-600	1	1_1
ENCFF736COV	bigWig	fold change over control	ENCSR057BWO	Histone ChIP-seq	GM12878	cell line	H3K4me3-human	200-600	2	2_1
ENCFF287HAO	bigWig	fold change over control	ENCSR057BWO	Histone ChIP-seq	GM12878	cell line	H3K4me3-human	200-600	1, 2	1_1, 2_1
ENCFF960FMM	bigWig	read-depth normalized signal	ENCSR000EMT	DNase-seq	GM12878	cell line			2	2_1
ENCFF428XFI	bigWig	read-depth normalized signal	ENCSR000EMT	DNase-seq	GM12878	cell line			1	1_1
ENCFF485CGE	bigWig	fold change over control	ENCSR000DZN	TF ChIP-seq	GM12878	cell line	CTCF-human		1, 2	1_1, 2_1
ENCFF484SOD	bigWig	fold change over control	ENCSR000DZN	TF ChIP-seq	GM12878	cell line	CTCF-human		1	1_1
ENCFF092OIL	bigWig	fold change over control	ENCSR000DZN	TF ChIP-seq	GM12878	cell line	CTCF-human		2	2_1
ENCFF716VWO	bigWig	fold change over control	ENCSR000AKC	Histone ChIP-seq	GM12878	cell line	H3K27ac-human		2	2_1
ENCFF469WVA	bigWig	fold change over control	ENCSR000AKC	Histone ChIP-seq	GM12878	cell line	H3K27ac-human		1, 2	1_1, 2_1
ENCFF458CRP	bigWig	fold change over control	ENCSR000AKC	Histone ChIP-seq	GM12878	cell line	H3K27ac-human		1	1_1
ENCFF579OIG	tsv	transcript quantifications	ENCSR938LSP	total RNA-seq	GM23338	cell line		>200	1	1_1
ENCFF502XXC	tsv	transcript quantifications	ENCSR938LSP	total RNA-seq	GM23338	cell line		>200	2	2_1
ENCFF198ZHN	tsv	transcript quantifications	ENCSR938LSP	total RNA-seq	GM23338	cell line		>200	1	1_1
ENCFF193DMT	tsv	transcript quantifications	ENCSR938LSP	total RNA-seq	GM23338	cell line		>200	2	2_1
ENCFF660BYF	tsv	transcript quantifications	ENCSR748GVH	polyA plus RNA-seq	GM23338	cell line		>200	2	2_1
ENCFF688VGT	tsv	transcript quantifications	ENCSR748GVH	polyA plus RNA-seq	GM23338	cell line		>200	1	1_1
ENCFF193NSG	bigWig	fold change over control	ENCSR729ENO	Histone ChIP-seq	GM23338	cell line	H3K27ac-human	200-600	1	1_1
ENCFF336OMS	bigWig	fold change over control	ENCSR729ENO	Histone ChIP-seq	GM23338	cell line	H3K27ac-human	200-600	2	2_1
ENCFF641QBD	bigWig	fold change over control	ENCSR729ENO	Histone ChIP-seq	GM23338	cell line	H3K27ac-human	200-600	1, 2	1_1, 2_1
ENCFF395HEQ	bigWig	read-depth normalized signal	ENCSR004SUL	DNase-seq	GM23338	cell line			2	2_1
ENCFF766CUM	bigWig	read-depth normalized signal	ENCSR004SUL	DNase-seq	GM23338	cell line			1	1_1
ENCFF101UCD	bigWig	fold change over control	ENCSR932ZMX	TF ChIP-seq	GM23338	cell line	CTCF-human		1	1_1
ENCFF188MNF	bigWig	fold change over control	ENCSR932ZMX	TF ChIP-seq	GM23338	cell line	CTCF-human		2	2_1
ENCFF369MIX	bigWig	fold change over control	ENCSR932ZMX	TF ChIP-seq	GM23338	cell line	CTCF-human		1, 2	1_1, 2_1
ENCFF242ICY	bigWig	fold change over control	ENCSR657DYL	Histone ChIP-seq	GM23338	cell line	H3K4me3-human	200-600	1	1_1
ENCFF860DIY	bigWig	fold change over control	ENCSR657DYL	Histone ChIP-seq	GM23338	cell line	H3K4me3-human	200-600	2	2_1
ENCFF446OPT	bigWig	fold change over control	ENCSR657DYL	Histone ChIP-seq	GM23338	cell line	H3K4me3-human	200-600	1, 2	1_1, 2_1
ENCFF378PRL	tsv	transcript quantifications	ENCSR043RSE	polyA plus RNA-seq	H1	cell line		200-250	1	1_1
ENCFF268JIS	tsv	transcript quantifications	ENCSR043RSE	polyA plus RNA-seq	H1	cell line		200-250	1	1_1
ENCFF676WBW	tsv	transcript quantifications	ENCSR670WQY	polyA plus RNA-seq	H1	cell line		200-250	1	1_1
ENCFF898DOH	tsv	transcript quantifications	ENCSR670WQY	polyA plus RNA-seq	H1	cell line		200-250	1	1_1
ENCFF302OKG	tsv	transcript quantifications	ENCSR000COU	polyA plus RNA-seq	H1	cell line		>200	1	1_1
ENCFF050XZF	tsv	transcript quantifications	ENCSR000COU	polyA plus RNA-seq	H1	cell line		>200	2	2_1
ENCFF888GIJ	tsv	transcript quantifications	ENCSR000COU	polyA plus RNA-seq	H1	cell line		>200	1	1_1
ENCFF590YJL	tsv	transcript quantifications	ENCSR000COU	polyA plus RNA-seq	H1	cell line		>200	2	2_1
ENCFF658AFW	tsv	transcript quantifications	ENCSR895ZTB	total RNA-seq	H1	cell line			1	1_1
ENCFF371NWP	tsv	transcript quantifications	ENCSR895ZTB	total RNA-seq	H1	cell line			2	2_1
ENCFF465VMY	tsv	transcript quantifications	ENCSR895ZTB	total RNA-seq	H1	cell line			1	1_1
ENCFF132IXN	tsv	transcript quantifications	ENCSR895ZTB	total RNA-seq	H1	cell line			2	2_1
ENCFF573NKX	bigWig	read-depth normalized signal	ENCSR000EMU	DNase-seq	H1	cell line			1	1_1
ENCFF314KQD	bigWig	fold change over control	ENCSR880SUY	Histone ChIP-seq	H1	cell line	H3K27ac-human		1, 2	1_2, 2_1
ENCFF038XPO	bigWig	fold change over control	ENCSR880SUY	Histone ChIP-seq	H1	cell line	H3K27ac-human		1	1_2
ENCFF779NOX	bigWig	fold change over control	ENCSR880SUY	Histone ChIP-seq	H1	cell line	H3K27ac-human		2	2_1
ENCFF583ZDO	bigWig	fold change over control	ENCSR814XPE	Histone ChIP-seq	H1	cell line	H3K4me3-human	300-600, 200-600	1	1_1
ENCFF760NUN	bigWig	fold change over control	ENCSR814XPE	Histone ChIP-seq	H1	cell line	H3K4me3-human	300-600, 200-600	1, 2	1_1, 2_1, 2_2
ENCFF509FFZ	bigWig	fold change over control	ENCSR814XPE	Histone ChIP-seq	H1	cell line	H3K4me3-human	300-600, 200-600	2	2_1, 2_2
ENCFF038RVZ	bigWig	fold change over control	ENCSR000BNH	TF ChIP-seq	H1	cell line	CTCF-human		1, 2	1_1, 2_1
ENCFF059STN	bigWig	fold change over control	ENCSR000BNH	TF ChIP-seq	H1	cell line	CTCF-human		1	1_1
ENCFF930WWO	bigWig	fold change over control	ENCSR000BNH	TF ChIP-seq	H1	cell line	CTCF-human		2	2_1
ENCFF041PVS	bigWig	fold change over control	ENCSR019SQX	Histone ChIP-seq	H1	cell line	H3K4me3-human		2	2_1
ENCFF493QWY	bigWig	fold change over control	ENCSR019SQX	Histone ChIP-seq	H1	cell line	H3K4me3-human		1, 2	1_1, 2_1
ENCFF475VJE	bigWig	fold change over control	ENCSR019SQX	Histone ChIP-seq	H1	cell line	H3K4me3-human		1	1_1
ENCFF738XDE	bigWig	fold change over control	ENCSR000ANP	Histone ChIP-seq	H1	cell line	H3K27ac-human		1	1_1
ENCFF779KCX	bigWig	fold change over control	ENCSR000ANP	Histone ChIP-seq	H1	cell line	H3K27ac-human		2	2_2
ENCFF919FBG	bigWig	fold change over control	ENCSR000ANP	Histone ChIP-seq	H1	cell line	H3K27ac-human		1, 2	1_1, 2_2
ENCFF602IAY	bigWig	fold change over control	ENCSR443YAS	Histone ChIP-seq	H1	cell line	H3K4me3-human		1, 2	1_1, 2_1
ENCFF438GVD	bigWig	fold change over control	ENCSR443YAS	Histone ChIP-seq	H1	cell line	H3K4me3-human		2	2_1
ENCFF138BOI	bigWig	fold change over control	ENCSR443YAS	Histone ChIP-seq	H1	cell line	H3K4me3-human		1	1_1
ENCFF008ZEQ	bigWig	fold change over control	ENCSR003SSR	Histone ChIP-seq	H1	cell line	H3K4me3-human		1	1_1
ENCFF782FXI	bigWig	fold change over control	ENCSR003SSR	Histone ChIP-seq	H1	cell line	H3K4me3-human		1, 2	1_1, 2_1
ENCFF096KWZ	bigWig	fold change over control	ENCSR003SSR	Histone ChIP-seq	H1	cell line	H3K4me3-human		2	2_1
ENCFF654QMA	tsv	transcript quantifications	ENCSR000CWM	polyA plus RNA-seq	HCT116	cell line		>200	1	1_1
ENCFF003PGO	tsv	transcript quantifications	ENCSR000CWM	polyA plus RNA-seq	HCT116	cell line		>200	1	1_1
ENCFF651GQO	tsv	transcript quantifications	ENCSR000CWM	polyA plus RNA-seq	HCT116	cell line		>200	2	2_1
ENCFF964VPA	tsv	transcript quantifications	ENCSR000CWM	polyA plus RNA-seq	HCT116	cell line		>200	2	2_1
ENCFF147EDS	tsv	transcript quantifications	ENCSR698RPL	total RNA-seq	HCT116	cell line			1	1_1
ENCFF198XLB	tsv	transcript quantifications	ENCSR698RPL	total RNA-seq	HCT116	cell line			1	1_1
ENCFF169MCH	bigWig	fold change over control	ENCSR000EUT	Histone ChIP-seq	HCT116	cell line	H3K27ac-human		1, 2	1_1, 2_1
ENCFF566DAG	bigWig	fold change over control	ENCSR000EUT	Histone ChIP-seq	HCT116	cell line	H3K27ac-human		1	1_1
ENCFF490DXB	bigWig	fold change over control	ENCSR000EUT	Histone ChIP-seq	HCT116	cell line	H3K27ac-human		2	2_1
ENCFF218DKI	bigWig	fold change over control	ENCSR000DTQ	Histone ChIP-seq	HCT116	cell line	H3K4me3-human		1	1_1
ENCFF184EQN	bigWig	fold change over control	ENCSR000DTQ	Histone ChIP-seq	HCT116	cell line	H3K4me3-human		2	2_1
ENCFF964OOU	bigWig	fold change over control	ENCSR000DTQ	Histone ChIP-seq	HCT116	cell line	H3K4me3-human		1, 2	1_1, 2_1
ENCFF906MKW	bigWig	read-depth normalized signal	ENCSR000ENM	DNase-seq	HCT116	cell line			2	2_1
ENCFF431JDU	bigWig	read-depth normalized signal	ENCSR000ENM	DNase-seq	HCT116	cell line			1	1_1
ENCFF417BKP	bigWig	fold change over control	ENCSR661KMA	Histone ChIP-seq	HCT116	cell line	H3K27ac-human	200-600	1	1_1
ENCFF953TWH	bigWig	fold change over control	ENCSR661KMA	Histone ChIP-seq	HCT116	cell line	H3K27ac-human	200-600	2	2_2
ENCFF787LMI	bigWig	fold change over control	ENCSR661KMA	Histone ChIP-seq	HCT116	cell line	H3K27ac-human	200-600	1, 2	1_1, 2_2
ENCFF825ECI	bigWig	fold change over control	ENCSR240PRQ	TF ChIP-seq	HCT116	cell line	CTCF-human	200-600	1, 2	1_1, 2_1
ENCFF028PUM	bigWig	fold change over control	ENCSR240PRQ	TF ChIP-seq	HCT116	cell line	CTCF-human	200-600	1	1_1
ENCFF304JSD	bigWig	fold change over control	ENCSR240PRQ	TF ChIP-seq	HCT116	cell line	CTCF-human	200-600	2	2_1
ENCFF457ZWF	bigWig	fold change over control	ENCSR333OPW	Histone ChIP-seq	HCT116	cell line	H3K4me3-human	200-600	1	1_1
ENCFF283FLI	bigWig	fold change over control	ENCSR333OPW	Histone ChIP-seq	HCT116	cell line	H3K4me3-human	200-600	2	2_1
ENCFF649ZLF	bigWig	fold change over control	ENCSR333OPW	Histone ChIP-seq	HCT116	cell line	H3K4me3-human	200-600	1, 2	1_1, 2_1
ENCFF798WQM	tsv	transcript quantifications	ENCSR000CPR	polyA plus RNA-seq	HeLa-S3	cell line		>200	2	2_1
ENCFF975NGG	tsv	transcript quantifications	ENCSR000CPR	polyA plus RNA-seq	HeLa-S3	cell line		>200	1	1_1
ENCFF364YCB	tsv	transcript quantifications	ENCSR000CPR	polyA plus RNA-seq	HeLa-S3	cell line		>200	1	1_1
ENCFF008ARC	tsv	transcript quantifications	ENCSR000CPR	polyA plus RNA-seq	HeLa-S3	cell line		>200	2	2_1
ENCFF194NJI	bigWig	read-depth normalized signal	ENCSR000ENO	DNase-seq	HeLa-S3	cell line			1	1_1
ENCFF949GHX	bigWig	read-depth normalized signal	ENCSR000ENO	DNase-seq	HeLa-S3	cell line			2	2_1
ENCFF010QGR	bigWig	fold change over control	ENCSR000AOC	Histone ChIP-seq	HeLa-S3	cell line	H3K27ac-human		1	1_1
ENCFF855XCJ	bigWig	fold change over control	ENCSR000AOC	Histone ChIP-seq	HeLa-S3	cell line	H3K27ac-human		2	2_1
ENCFF658XKZ	bigWig	fold change over control	ENCSR000AOC	Histone ChIP-seq	HeLa-S3	cell line	H3K27ac-human		1, 2	1_1, 2_1
ENCFF215FZM	bigWig	fold change over control	ENCSR000AOA	TF ChIP-seq	HeLa-S3	cell line	CTCF-human		1	1_1
ENCFF464OSE	bigWig	fold change over control	ENCSR000AOA	TF ChIP-seq	HeLa-S3	cell line	CTCF-human		2	2_1
ENCFF179RSE	bigWig	fold change over control	ENCSR000AOA	TF ChIP-seq	HeLa-S3	cell line	CTCF-human		1, 2	1_1, 2_1
ENCFF532TVQ	bigWig	fold change over control	ENCSR000AOF	Histone ChIP-seq	HeLa-S3	cell line	H3K4me3-human		1	1_1
ENCFF933NWW	bigWig	fold change over control	ENCSR000AOF	Histone ChIP-seq	HeLa-S3	cell line	H3K4me3-human		2	2_1
ENCFF460QIU	bigWig	fold change over control	ENCSR000AOF	Histone ChIP-seq	HeLa-S3	cell line	H3K4me3-human		1, 2	1_1, 2_1
ENCFF757GHL	bigWig	read-depth normalized signal	ENCSR959ZXU	DNase-seq	HeLa-S3	cell line			1	1_1
ENCFF660ZUF	bigWig	read-depth normalized signal	ENCSR959ZXU	DNase-seq	HeLa-S3	cell line			2	2_1
ENCFF977QAI	tsv	transcript quantifications	ENCSR000CPE	polyA plus RNA-seq	HepG2	cell line		>200	2	2_1
ENCFF642NRP	tsv	transcript quantifications	ENCSR000CPE	polyA plus RNA-seq	HepG2	cell line		>200	1	1_1
ENCFF416RHJ	tsv	transcript quantifications	ENCSR000CPE	polyA plus RNA-seq	HepG2	cell line		>200	1	1_1
ENCFF938LTW	tsv	transcript quantifications	ENCSR000CPE	polyA plus RNA-seq	HepG2	cell line		>200	2	2_1
ENCFF996UCI	tsv	transcript quantifications	ENCSR181ZGR	total RNA-seq	HepG2	cell line		>200	2	2_1
ENCFF841EMY	tsv	transcript quantifications	ENCSR181ZGR	total RNA-seq	HepG2	cell line		>200	1	1_1
ENCFF646HZV	tsv	transcript quantifications	ENCSR181ZGR	total RNA-seq	HepG2	cell line		>200	2	2_1
ENCFF859XKH	tsv	transcript quantifications	ENCSR181ZGR	total RNA-seq	HepG2	cell line		>200	1	1_1
ENCFF108DRB	tsv	transcript quantifications	ENCSR985KAT	polyA plus RNA-seq	HepG2	cell line		>200	2	2_1
ENCFF578FBF	tsv	transcript quantifications	ENCSR985KAT	polyA plus RNA-seq	HepG2	cell line		>200	1	1_1
ENCFF458NJB	tsv	transcript quantifications	ENCSR985KAT	polyA plus RNA-seq	HepG2	cell line		>200	1	1_1
ENCFF371KBB	tsv	transcript quantifications	ENCSR985KAT	polyA plus RNA-seq	HepG2	cell line		>200	2	2_1
ENCFF785EQB	bigWig	fold change over control	ENCSR000AMP	Histone ChIP-seq	HepG2	cell line	H3K4me3-human		1	1_1
ENCFF284FVP	bigWig	fold change over control	ENCSR000AMP	Histone ChIP-seq	HepG2	cell line	H3K4me3-human		1, 2	1_1, 2_1
ENCFF053XDJ	bigWig	fold change over control	ENCSR000AMP	Histone ChIP-seq	HepG2	cell line	H3K4me3-human		2	2_1
ENCFF113VII	bigWig	read-depth normalized signal	ENCSR149XIL	DNase-seq	HepG2	cell line			2	2_1
ENCFF546MZK	bigWig	read-depth normalized signal	ENCSR149XIL	DNase-seq	HepG2	cell line			1	1_1
ENCFF981UER	bigWig	fold change over control	ENCSR607XFI	TF ChIP-seq	HepG2	cell line	CTCF-human		2	2_1
ENCFF301SGJ	bigWig	fold change over control	ENCSR607XFI	TF ChIP-seq	HepG2	cell line	CTCF-human		1, 2	1_1, 2_1
ENCFF989NNN	bigWig	fold change over control	ENCSR607XFI	TF ChIP-seq	HepG2	cell line	CTCF-human		1	1_1
ENCFF153WDH	bigWig	fold change over control	ENCSR000AMO	Histone ChIP-seq	HepG2	cell line	H3K27ac-human		2	2_1
ENCFF401PIF	bigWig	fold change over control	ENCSR000AMO	Histone ChIP-seq	HepG2	cell line	H3K27ac-human		1	1_1
ENCFF795ONN	bigWig	fold change over control	ENCSR000AMO	Histone ChIP-seq	HepG2	cell line	H3K27ac-human		1, 2	1_1, 2_1
ENCFF992REP	bigWig	fold change over control	ENCSR575RRX	Histone ChIP-seq	HepG2	cell line	H3K4me3-human	200-600	1	1_1
ENCFF981CDI	bigWig	fold change over control	ENCSR575RRX	Histone ChIP-seq	HepG2	cell line	H3K4me3-human	200-600	2	2_1
ENCFF500VAH	bigWig	fold change over control	ENCSR575RRX	Histone ChIP-seq	HepG2	cell line	H3K4me3-human	200-600	1, 2	1_1, 2_1
ENCFF940GYO	tsv	transcript quantifications	ENCSR000CPH	polyA plus RNA-seq	K562	cell line		>200	2	2_1
ENCFF823JHX	tsv	transcript quantifications	ENCSR000CPH	polyA plus RNA-seq	K562	cell line		>200	1	1_1
ENCFF254AJX	tsv	transcript quantifications	ENCSR000CPH	polyA plus RNA-seq	K562	cell line		>200	1	1_1
ENCFF142FDI	tsv	transcript quantifications	ENCSR000CPH	polyA plus RNA-seq	K562	cell line		>200	2	2_1
ENCFF964MZP	tsv	transcript quantifications	ENCSR000AEP	polyA plus RNA-seq	K562	cell line		>200	1	1_1
ENCFF060YKD	tsv	transcript quantifications	ENCSR000AEP	polyA plus RNA-seq	K562	cell line		>200	2	2_1
ENCFF122TNW	tsv	transcript quantifications	ENCSR000AEP	polyA plus RNA-seq	K562	cell line		>200	1	1_1
ENCFF959YEC	tsv	transcript quantifications	ENCSR000AEP	polyA plus RNA-seq	K562	cell line		>200	2	2_1
ENCFF591YGQ	tsv	transcript quantifications	ENCSR109IQO	total RNA-seq	K562	cell line		>200	1	1_1
ENCFF908CTD	tsv	transcript quantifications	ENCSR109IQO	total RNA-seq	K562	cell line		>200	2	2_1
ENCFF012LGS	tsv	transcript quantifications	ENCSR109IQO	total RNA-seq	K562	cell line		>200	1	1_1
ENCFF714FKW	tsv	transcript quantifications	ENCSR109IQO	total RNA-seq	K562	cell line		>200	2	2_1
ENCFF545JLB	bigWig	fold change over control	ENCSR000AKU	Histone ChIP-seq	K562	cell line	H3K4me3-human		1	1_1
ENCFF617VRS	bigWig	fold change over control	ENCSR000AKU	Histone ChIP-seq	K562	cell line	H3K4me3-human		2	2_1
ENCFF660WUG	bigWig	fold change over control	ENCSR000AKU	Histone ChIP-seq	K562	cell line	H3K4me3-human		1, 2	1_1, 2_1
ENCFF254FRH	bigWig	fold change over control	ENCSR000EGM	TF ChIP-seq	K562	cell line	CTCF-human		1	1_1
ENCFF682MFJ	bigWig	fold change over control	ENCSR000EGM	TF ChIP-seq	K562	cell line	CTCF-human		1, 2	1_1, 2_1
ENCFF952NHK	bigWig	fold change over control	ENCSR000EGM	TF ChIP-seq	K562	cell line	CTCF-human		2	2_1
ENCFF414OGC	bigWig	read-depth normalized signal	ENCSR000EOT	DNase-seq	K562	cell line			1	1_1, 1_2
ENCFF338LXW	bigWig	read-depth normalized signal	ENCSR000EOT	DNase-seq	K562	cell line			2	2_1
ENCFF977KGH	bigWig	fold change over control	ENCSR000AKP	Histone ChIP-seq	K562	cell line	H3K27ac-human		1	1_1
ENCFF745TSK	bigWig	fold change over control	ENCSR000AKP	Histone ChIP-seq	K562	cell line	H3K27ac-human		2	2_1
ENCFF849TDM	bigWig	fold change over control	ENCSR000AKP	Histone ChIP-seq	K562	cell line	H3K27ac-human		1, 2	1_1, 2_1
ENCFF253TOF	bigWig	fold change over control	ENCSR668LDD	Histone ChIP-seq	K562	cell line	H3K4me3-human	200-600	1, 2	1_1, 2_1
ENCFF089RDX	bigWig	fold change over control	ENCSR668LDD	Histone ChIP-seq	K562	cell line	H3K4me3-human	200-600	1	1_1
ENCFF941IYM	bigWig	fold change over control	ENCSR668LDD	Histone ChIP-seq	K562	cell line	H3K4me3-human	200-600	2	2_1
ENCFF062DRT	tsv	transcript quantifications	ENCSR000CPL	polyA plus RNA-seq	keratinocyte	primary cell		>200	5	5_1
ENCFF441BPU	tsv	transcript quantifications	ENCSR000CPL	polyA plus RNA-seq	keratinocyte	primary cell		>200	1	1_1
ENCFF268QJZ	tsv	transcript quantifications	ENCSR000CPL	polyA plus RNA-seq	keratinocyte	primary cell		>200	2	2_1
ENCFF404HZO	tsv	transcript quantifications	ENCSR000CPL	polyA plus RNA-seq	keratinocyte	primary cell		>200	2	2_1
ENCFF085RUN	tsv	transcript quantifications	ENCSR000CPL	polyA plus RNA-seq	keratinocyte	primary cell		>200	1	1_1
ENCFF205ANP	tsv	transcript quantifications	ENCSR000CPL	polyA plus RNA-seq	keratinocyte	primary cell		>200	5	5_1
ENCFF107CUR	bigWig	fold change over control	ENCSR000ALO	Histone ChIP-seq	keratinocyte	primary cell	H3K4me3-human		2	2_1
ENCFF079YXO	bigWig	fold change over control	ENCSR000ALO	Histone ChIP-seq	keratinocyte	primary cell	H3K4me3-human		1, 2, 3	1_1, 2_1, 3_1
ENCFF421HXW	bigWig	fold change over control	ENCSR000ALO	Histone ChIP-seq	keratinocyte	primary cell	H3K4me3-human		3	3_1
ENCFF539ZRC	bigWig	fold change over control	ENCSR000ALO	Histone ChIP-seq	keratinocyte	primary cell	H3K4me3-human		1	1_1
ENCFF404ILZ	bigWig	read-depth normalized signal	ENCSR000EPQ	DNase-seq	keratinocyte	primary cell			2	2_1
ENCFF494IGD	bigWig	read-depth normalized signal	ENCSR000EPQ	DNase-seq	keratinocyte	primary cell			1	1_1
ENCFF318UHZ	bigWig	fold change over control	ENCSR000DNC	TF ChIP-seq	keratinocyte	primary cell	CTCF-human		2	2_1
ENCFF771DBH	bigWig	fold change over control	ENCSR000DNC	TF ChIP-seq	keratinocyte	primary cell	CTCF-human		1	1_1
ENCFF261CVM	bigWig	fold change over control	ENCSR000DNC	TF ChIP-seq	keratinocyte	primary cell	CTCF-human		1, 2	1_1, 2_1
ENCFF411GZX	bigWig	fold change over control	ENCSR000DNC	TF ChIP-seq	keratinocyte	primary cell	CTCF-human		2	2_1
ENCFF298JJU	bigWig	fold change over control	ENCSR000DNC	TF ChIP-seq	keratinocyte	primary cell	CTCF-human		1, 2	1_1, 2_1
ENCFF013ROK	bigWig	fold change over control	ENCSR000DNC	TF ChIP-seq	keratinocyte	primary cell	CTCF-human		1	1_1
ENCFF233IOE	bigWig	fold change over control	ENCSR970FPM	Histone ChIP-seq	keratinocyte	primary cell	H3K4me3-human	200-600	2	2_1
ENCFF632PUY	bigWig	fold change over control	ENCSR970FPM	Histone ChIP-seq	keratinocyte	primary cell	H3K4me3-human	200-600	1, 2	1_1, 2_1
ENCFF339PFJ	bigWig	fold change over control	ENCSR970FPM	Histone ChIP-seq	keratinocyte	primary cell	H3K4me3-human	200-600	1	1_1
ENCFF443TJZ	bigWig	fold change over control	ENCSR000ALK	Histone ChIP-seq	keratinocyte	primary cell	H3K27ac-human		1, 2	1_1, 2_1
ENCFF575SBG	bigWig	fold change over control	ENCSR000ALK	Histone ChIP-seq	keratinocyte	primary cell	H3K27ac-human		1	1_1
ENCFF360XRT	bigWig	fold change over control	ENCSR000ALK	Histone ChIP-seq	keratinocyte	primary cell	H3K27ac-human		2	2_1
ENCFF030IUO	tsv	transcript quantifications	ENCSR000CPT	polyA plus RNA-seq	MCF-7	cell line		>200	2	2_1
ENCFF930TQB	tsv	transcript quantifications	ENCSR000CPT	polyA plus RNA-seq	MCF-7	cell line		>200	2	2_1
ENCFF328CKZ	tsv	transcript quantifications	ENCSR000CPT	polyA plus RNA-seq	MCF-7	cell line		>200	1	1_1
ENCFF296ZWB	tsv	transcript quantifications	ENCSR000CPT	polyA plus RNA-seq	MCF-7	cell line		>200	1	1_1
ENCFF289IJV	tsv	transcript quantifications	ENCSR355JZC	total RNA-seq	MCF-7	cell line			1	1_1
ENCFF482JVG	tsv	transcript quantifications	ENCSR355JZC	total RNA-seq	MCF-7	cell line			1	1_1
ENCFF395YPR	bigWig	fold change over control	ENCSR752UOD	Histone ChIP-seq	MCF-7	cell line	H3K27ac-human	200-600	1	1_1, 1_2
ENCFF047PAZ	bigWig	fold change over control	ENCSR752UOD	Histone ChIP-seq	MCF-7	cell line	H3K27ac-human	200-600	2	2_1
ENCFF063VLJ	bigWig	fold change over control	ENCSR752UOD	Histone ChIP-seq	MCF-7	cell line	H3K27ac-human	200-600	1, 2	1_1, 1_2, 2_1
ENCFF631QXL	bigWig	read-depth normalized signal	ENCSR000EPH	DNase-seq	MCF-7	cell line			1	1_1
ENCFF134COA	bigWig	read-depth normalized signal	ENCSR000EPH	DNase-seq	MCF-7	cell line			2	2_1
ENCFF559CLH	bigWig	fold change over control	ENCSR985MIB	Histone ChIP-seq	MCF-7	cell line	H3K4me3-human	200-600	1	1_1
ENCFF267OQQ	bigWig	fold change over control	ENCSR985MIB	Histone ChIP-seq	MCF-7	cell line	H3K4me3-human	200-600	1, 2	1_1, 2_1
ENCFF763FZF	bigWig	fold change over control	ENCSR985MIB	Histone ChIP-seq	MCF-7	cell line	H3K4me3-human	200-600	2	2_1
ENCFF157EYO	bigWig	fold change over control	ENCSR560BUE	TF ChIP-seq	MCF-7	cell line	CTCF-human	200-600	1, 2	1_1, 2_1
ENCFF981ABA	bigWig	fold change over control	ENCSR560BUE	TF ChIP-seq	MCF-7	cell line	CTCF-human	200-600	2	2_1
ENCFF770ZRW	bigWig	fold change over control	ENCSR560BUE	TF ChIP-seq	MCF-7	cell line	CTCF-human	200-600	1	1_1
ENCFF013UVO	tsv	transcript quantifications	ENCSR244ISQ	total RNA-seq	neural progenitor cell	in vitro differentiated cells		>200	2	2_1
ENCFF670GKO	tsv	transcript quantifications	ENCSR244ISQ	total RNA-seq	neural progenitor cell	in vitro differentiated cells		>200	2	2_1
ENCFF666QCX	tsv	transcript quantifications	ENCSR244ISQ	total RNA-seq	neural progenitor cell	in vitro differentiated cells		>200	1	1_1
ENCFF607DUH	tsv	transcript quantifications	ENCSR244ISQ	total RNA-seq	neural progenitor cell	in vitro differentiated cells		>200	1	1_1
ENCFF174IIR	bigWig	fold change over control	ENCSR449AXO	Histone ChIP-seq	neural progenitor cell	in vitro differentiated cells	H3K27ac-human	200-600	1	1_1
ENCFF004OPR	bigWig	fold change over control	ENCSR449AXO	Histone ChIP-seq	neural progenitor cell	in vitro differentiated cells	H3K27ac-human	200-600	2	2_1
ENCFF618RAO	bigWig	fold change over control	ENCSR449AXO	Histone ChIP-seq	neural progenitor cell	in vitro differentiated cells	H3K27ac-human	200-600	1, 2	1_1, 2_1
ENCFF104ELH	bigWig	fold change over control	ENCSR661MUS	Histone ChIP-seq	neural progenitor cell	in vitro differentiated cells	H3K4me3-human	200-600	2	2_1, 2_2
ENCFF957WNV	bigWig	fold change over control	ENCSR661MUS	Histone ChIP-seq	neural progenitor cell	in vitro differentiated cells	H3K4me3-human	200-600	1	1_1, 1_2
ENCFF835JIA	bigWig	fold change over control	ENCSR661MUS	Histone ChIP-seq	neural progenitor cell	in vitro differentiated cells	H3K4me3-human	200-600	1, 2	1_1, 1_2, 2_1, 2_2
ENCFF286QGB	bigWig	read-depth normalized signal	ENCSR963ALV	DNase-seq	neural progenitor cell	in vitro differentiated cells			1	1_1
ENCFF142KTI	bigWig	read-depth normalized signal	ENCSR963ALV	DNase-seq	neural progenitor cell	in vitro differentiated cells			2	2_1
ENCFF572SFB	bigWig	fold change over control	ENCSR125NBL	TF ChIP-seq	neural progenitor cell	in vitro differentiated cells	CTCF-human	200-600	1	1_1, 1_2
ENCFF700SCP	bigWig	fold change over control	ENCSR125NBL	TF ChIP-seq	neural progenitor cell	in vitro differentiated cells	CTCF-human	200-600	1, 2	1_1, 1_2, 2_1
ENCFF896TQG	bigWig	fold change over control	ENCSR125NBL	TF ChIP-seq	neural progenitor cell	in vitro differentiated cells	CTCF-human	200-600	2	2_1
ENCFF902CCF	tsv	transcript quantifications	ENCSR001HHK	total RNA-seq	OCI-LY7	cell line		>200	2	2_1
ENCFF073BFP	tsv	transcript quantifications	ENCSR001HHK	total RNA-seq	OCI-LY7	cell line		>200	2	2_1
ENCFF410ULZ	tsv	transcript quantifications	ENCSR001HHK	total RNA-seq	OCI-LY7	cell line		>200	1	1_1
ENCFF247HMV	tsv	transcript quantifications	ENCSR001HHK	total RNA-seq	OCI-LY7	cell line		>200	1	1_1
ENCFF975BGM	bigWig	fold change over control	ENCSR027HML	TF ChIP-seq	OCI-LY7	cell line	CTCF-human	200-600	1, 2	1_1, 2_1
ENCFF684IUB	bigWig	fold change over control	ENCSR027HML	TF ChIP-seq	OCI-LY7	cell line	CTCF-human	200-600	1	1_1
ENCFF161GVV	bigWig	fold change over control	ENCSR027HML	TF ChIP-seq	OCI-LY7	cell line	CTCF-human	200-600	2	2_1
ENCFF739TLM	bigWig	read-depth normalized signal	ENCSR489NAM	DNase-seq	OCI-LY7	cell line			2	2_1
ENCFF136RNO	bigWig	read-depth normalized signal	ENCSR489NAM	DNase-seq	OCI-LY7	cell line			1	1_1
ENCFF741DRQ	bigWig	fold change over control	ENCSR005SXO	Histone ChIP-seq	OCI-LY7	cell line	H3K4me3-human	200-600	1	1_1
ENCFF108EGJ	bigWig	fold change over control	ENCSR005SXO	Histone ChIP-seq	OCI-LY7	cell line	H3K4me3-human	200-600	2	2_1
ENCFF630BQS	bigWig	fold change over control	ENCSR005SXO	Histone ChIP-seq	OCI-LY7	cell line	H3K4me3-human	200-600	1, 2	1_1, 2_1
ENCFF931SDF	bigWig	fold change over control	ENCSR447ZGY	Histone ChIP-seq	OCI-LY7	cell line	H3K27ac-human	200-600	1	1_1
ENCFF646GON	bigWig	fold change over control	ENCSR447ZGY	Histone ChIP-seq	OCI-LY7	cell line	H3K27ac-human	200-600	2	2_1
ENCFF611XLA	bigWig	fold change over control	ENCSR447ZGY	Histone ChIP-seq	OCI-LY7	cell line	H3K27ac-human	200-600	1, 2	1_1, 2_1
ENCFF838DGE	tsv	transcript quantifications	ENCSR128CYL	total RNA-seq	Panc1	cell line			1	1_1
ENCFF937ZIY	tsv	transcript quantifications	ENCSR128CYL	total RNA-seq	Panc1	cell line			1	1_1
ENCFF875IHG	tsv	transcript quantifications	ENCSR000BYM	polyA plus RNA-seq	Panc1	cell line		>200	1	1_1
ENCFF480KEG	tsv	transcript quantifications	ENCSR000BYM	polyA plus RNA-seq	Panc1	cell line		>200	2	2_1
ENCFF569TEU	bigWig	fold change over control	ENCSR000EXK	Histone ChIP-seq	Panc1	cell line	H3K27ac-human		1	1_1
ENCFF240BXE	bigWig	fold change over control	ENCSR000EXK	Histone ChIP-seq	Panc1	cell line	H3K27ac-human		2	2_1
ENCFF493AZX	bigWig	fold change over control	ENCSR000EXK	Histone ChIP-seq	Panc1	cell line	H3K27ac-human		1, 2	1_1, 2_1
ENCFF611GRX	bigWig	fold change over control	ENCSR203QEB	TF ChIP-seq	Panc1	cell line	CTCF-human	450-650	1	1_1
ENCFF189OWQ	bigWig	fold change over control	ENCSR203QEB	TF ChIP-seq	Panc1	cell line	CTCF-human	450-650	2	2_1
ENCFF004ITE	bigWig	fold change over control	ENCSR203QEB	TF ChIP-seq	Panc1	cell line	CTCF-human	450-650	1, 2	1_1, 2_1
ENCFF877RMP	bigWig	fold change over control	ENCSR000DXB	Histone ChIP-seq	Panc1	cell line	H3K4me3-human		1	1_1
ENCFF293TBM	bigWig	fold change over control	ENCSR000DXB	Histone ChIP-seq	Panc1	cell line	H3K4me3-human		2	2_1
ENCFF860FUS	bigWig	fold change over control	ENCSR000DXB	Histone ChIP-seq	Panc1	cell line	H3K4me3-human		1, 2	1_1, 2_1
ENCFF172JTU	bigWig	read-depth normalized signal	ENCSR000EPT	DNase-seq	Panc1	cell line			2	2_1
ENCFF857RXA	bigWig	read-depth normalized signal	ENCSR000EPT	DNase-seq	Panc1	cell line			1	1_1
ENCFF721CBA	tsv	transcript quantifications	ENCSR420NLC	total RNA-seq	PC-3	cell line		>200	1	1_1
ENCFF620OLW	tsv	transcript quantifications	ENCSR420NLC	total RNA-seq	PC-3	cell line		>200	2	2_1
ENCFF507MQQ	tsv	transcript quantifications	ENCSR420NLC	total RNA-seq	PC-3	cell line		>200	1	1_1
ENCFF479SJK	tsv	transcript quantifications	ENCSR420NLC	total RNA-seq	PC-3	cell line		>200	2	2_1
ENCFF705DKP	bigWig	fold change over control	ENCSR359LOD	TF ChIP-seq	PC-3	cell line	CTCF-human	300-600	1	1_1
ENCFF186ZNC	bigWig	fold change over control	ENCSR359LOD	TF ChIP-seq	PC-3	cell line	CTCF-human	300-600	2	2_1
ENCFF756ESH	bigWig	fold change over control	ENCSR359LOD	TF ChIP-seq	PC-3	cell line	CTCF-human	300-600	1, 2	1_1, 2_1
ENCFF698WSG	bigWig	fold change over control	ENCSR826UTD	Histone ChIP-seq	PC-3	cell line	H3K27ac-human	300-600	1	1_1
ENCFF537PUA	bigWig	fold change over control	ENCSR826UTD	Histone ChIP-seq	PC-3	cell line	H3K27ac-human	300-600	1, 2	1_1, 2_1
ENCFF651PFC	bigWig	fold change over control	ENCSR826UTD	Histone ChIP-seq	PC-3	cell line	H3K27ac-human	300-600	2	2_1
ENCFF823ZMT	bigWig	fold change over control	ENCSR275NCH	Histone ChIP-seq	PC-3	cell line	H3K4me3-human	300-600	1	1_1
ENCFF159LMA	bigWig	fold change over control	ENCSR275NCH	Histone ChIP-seq	PC-3	cell line	H3K4me3-human	300-600	2	2_1
ENCFF319OET	bigWig	fold change over control	ENCSR275NCH	Histone ChIP-seq	PC-3	cell line	H3K4me3-human	300-600	1, 2	1_1, 2_1
ENCFF599UKS	bigWig	read-depth normalized signal	ENCSR052AWE	DNase-seq	PC-3	cell line			1	1_1
ENCFF835RBO	bigWig	read-depth normalized signal	ENCSR052AWE	DNase-seq	PC-3	cell line			2	2_1
