# Supplementary material for: A scalable computational framework for predicting gene expression from candidate cis -regulatory elements
Source: HighWire-hosted journal article supplement (doi:10.1101/gr.281219.125), 2026-01-16
Supplement: Supplemental_Table_S3.xlsx [file Supplemental_Table_S3.xlsx]

## Sheet: Supplemental_Table_S3
Summary of mouse data from different cell types/lines in this study
File accession	File format	Output type	Experiment accession	Assay	Biosample term name	Biosample type	Experiment target	Library size range	Biological replicate(s)	Technical replicate(s)
ENCFF552IHH	tsv	transcript quantifications	ENCSR000CWD	total RNA-seq	CH12.LX	cell line		mm10	1	1_1
ENCFF135VPP	tsv	transcript quantifications	ENCSR000CWD	total RNA-seq	CH12.LX	cell line		mm10	2	2_1
ENCFF237FHG	tsv	transcript quantifications	ENCSR000CWD	total RNA-seq	CH12.LX	cell line		mm10	1	1_1
ENCFF657QFG	tsv	transcript quantifications	ENCSR000CWD	total RNA-seq	CH12.LX	cell line		mm10	2	2_1
ENCFF820VIR	tsv	transcript quantifications	ENCSR000CHR	polyA plus RNA-seq	CH12.LX	cell line		mm10	2	2_1
ENCFF561BOW	tsv	transcript quantifications	ENCSR000CHR	polyA plus RNA-seq	CH12.LX	cell line		mm10	1	1_1
ENCFF233HAB	tsv	transcript quantifications	ENCSR000AJV	total RNA-seq	CH12.LX	cell line		mm10	1	1_1
ENCFF477PSN	tsv	transcript quantifications	ENCSR000AJV	total RNA-seq	CH12.LX	cell line		mm10	2	2_1
ENCFF895QRR	tsv	transcript quantifications	ENCSR000AJV	total RNA-seq	CH12.LX	cell line		mm10	1	1_1
ENCFF072KSX	tsv	transcript quantifications	ENCSR000AJV	total RNA-seq	CH12.LX	cell line		mm10	2	2_1
ENCFF315JOG	bigWig	read-depth normalized signal	ENCSR000CMQ	DNase-seq	CH12.LX	cell line		mm10	2	2_1
ENCFF228LWM	bigWig	read-depth normalized signal	ENCSR000CMQ	DNase-seq	CH12.LX	cell line		mm10	1	1_1
ENCFF682RGY	bigWig	read-depth normalized signal	ENCSR000CMQ	DNase-seq	CH12.LX	cell line		mm10	1	1_1
ENCFF578APN	bigWig	read-depth normalized signal	ENCSR000CMQ	DNase-seq	CH12.LX	cell line		mm10	2	2_1
ENCFF738ICM	bigWig	fold change over control	ENCSR000DHU	Histone ChIP-seq	CH12.LX	cell line	H3K4me3-mouse	mm10	1	1_1
ENCFF554TFI	bigWig	fold change over control	ENCSR000DHU	Histone ChIP-seq	CH12.LX	cell line	H3K4me3-mouse	mm10	1	1_1
ENCFF149VRJ	bigWig	fold change over control	ENCSR000DHU	Histone ChIP-seq	CH12.LX	cell line	H3K4me3-mouse	mm10	2	2_1
ENCFF288OKN	bigWig	fold change over control	ENCSR000DHU	Histone ChIP-seq	CH12.LX	cell line	H3K4me3-mouse	mm10	1, 2	1_1, 2_1
ENCFF367BSO	bigWig	fold change over control	ENCSR000DHU	Histone ChIP-seq	CH12.LX	cell line	H3K4me3-mouse	mm10	2	2_1
ENCFF171TNA	bigWig	fold change over control	ENCSR000DHU	Histone ChIP-seq	CH12.LX	cell line	H3K4me3-mouse	mm10	1, 2	1_1, 2_1
ENCFF096TSJ	bigWig	fold change over control	ENCSR000CGJ	Histone ChIP-seq	CH12.LX	cell line	H3K27ac-mouse	mm10	1	1_1
ENCFF970NYL	bigWig	fold change over control	ENCSR000CGJ	Histone ChIP-seq	CH12.LX	cell line	H3K27ac-mouse	mm10	2	2_1
ENCFF867PYD	bigWig	fold change over control	ENCSR000CGJ	Histone ChIP-seq	CH12.LX	cell line	H3K27ac-mouse	mm10	1, 2	1_1, 2_1
ENCFF883PUL	bigWig	fold change over control	ENCSR000CGJ	Histone ChIP-seq	CH12.LX	cell line	H3K27ac-mouse	mm10	2	2_1
ENCFF672JRS	bigWig	fold change over control	ENCSR000CGJ	Histone ChIP-seq	CH12.LX	cell line	H3K27ac-mouse	mm10	1	1_1
ENCFF666CND	bigWig	fold change over control	ENCSR000CGJ	Histone ChIP-seq	CH12.LX	cell line	H3K27ac-mouse	mm10	1, 2	1_1, 2_1
ENCFF011TAF	bigWig	fold change over control	ENCSR000CGK	Histone ChIP-seq	CH12.LX	cell line	H3K4me3-mouse	mm10	1	1_1
ENCFF704ZVD	bigWig	fold change over control	ENCSR000CGK	Histone ChIP-seq	CH12.LX	cell line	H3K4me3-mouse	mm10	2	2_1
ENCFF500BXF	bigWig	fold change over control	ENCSR000CGK	Histone ChIP-seq	CH12.LX	cell line	H3K4me3-mouse	mm10	1, 2	1_1, 2_1
ENCFF672OAB	bigWig	fold change over control	ENCSR000CGK	Histone ChIP-seq	CH12.LX	cell line	H3K4me3-mouse	mm10	1	1_1
ENCFF420ORJ	bigWig	fold change over control	ENCSR000CGK	Histone ChIP-seq	CH12.LX	cell line	H3K4me3-mouse	mm10	1, 2	1_1, 2_1
ENCFF132HID	bigWig	fold change over control	ENCSR000CGK	Histone ChIP-seq	CH12.LX	cell line	H3K4me3-mouse	mm10	2	2_1
ENCFF289QMU	bigWig	fold change over control	ENCSR000ADI	Histone ChIP-seq	CH12.LX	cell line	H3K4me3-mouse	mm10	1	1_1
ENCFF186GLL	bigWig	fold change over control	ENCSR000ADI	Histone ChIP-seq	CH12.LX	cell line	H3K4me3-mouse	mm10	2	2_1
ENCFF426ODS	bigWig	fold change over control	ENCSR000ADI	Histone ChIP-seq	CH12.LX	cell line	H3K4me3-mouse	mm10	1, 2	1_1, 2_1
ENCFF727COH	bigWig	fold change over control	ENCSR000ADI	Histone ChIP-seq	CH12.LX	cell line	H3K4me3-mouse	mm10	1	1_1
ENCFF351YRY	bigWig	fold change over control	ENCSR000ADI	Histone ChIP-seq	CH12.LX	cell line	H3K4me3-mouse	mm10	2	2_1
ENCFF495OUR	bigWig	fold change over control	ENCSR000ADI	Histone ChIP-seq	CH12.LX	cell line	H3K4me3-mouse	mm10	1, 2	1_1, 2_1
ENCFF248ADF	bigWig	fold change over control	ENCSR000ERM	TF ChIP-seq	CH12.LX	cell line	CTCF-mouse	mm10	1	1_1
ENCFF527MQZ	bigWig	fold change over control	ENCSR000ERM	TF ChIP-seq	CH12.LX	cell line	CTCF-mouse	mm10	2	2_1
ENCFF641JPY	bigWig	fold change over control	ENCSR000ERM	TF ChIP-seq	CH12.LX	cell line	CTCF-mouse	mm10	1	1_1
ENCFF504YYO	bigWig	fold change over control	ENCSR000ERM	TF ChIP-seq	CH12.LX	cell line	CTCF-mouse	mm10	2	2_1
ENCFF025UEN	bigWig	fold change over control	ENCSR000ERM	TF ChIP-seq	CH12.LX	cell line	CTCF-mouse	mm10	1, 2	1_1, 2_1
ENCFF499GIZ	bigWig	fold change over control	ENCSR000ERM	TF ChIP-seq	CH12.LX	cell line	CTCF-mouse	mm10	1, 2	1_1, 2_1
ENCFF980OLE	bigWig	fold change over control	ENCSR000DIU	TF ChIP-seq	CH12.LX	cell line	CTCF-mouse	mm10	2	2_1
ENCFF504OHG	bigWig	fold change over control	ENCSR000DIU	TF ChIP-seq	CH12.LX	cell line	CTCF-mouse	mm10	1	1_1
ENCFF844EOO	bigWig	fold change over control	ENCSR000DIU	TF ChIP-seq	CH12.LX	cell line	CTCF-mouse	mm10	1, 2	1_1, 2_1
ENCFF367MVS	bigWig	fold change over control	ENCSR000DIU	TF ChIP-seq	CH12.LX	cell line	CTCF-mouse	mm10	1	1_1
ENCFF054XOV	bigWig	fold change over control	ENCSR000DIU	TF ChIP-seq	CH12.LX	cell line	CTCF-mouse	mm10	2	2_1
ENCFF137XUJ	bigWig	fold change over control	ENCSR000DIU	TF ChIP-seq	CH12.LX	cell line	CTCF-mouse	mm10	1, 2	1_1, 2_1
ENCFF866TGF	tsv	transcript quantifications	ENCSR000CWE	total RNA-seq	MEL	cell line		mm10	2	2_1
ENCFF967ANC	tsv	transcript quantifications	ENCSR000CWE	total RNA-seq	MEL	cell line		mm10	1	1_1
ENCFF113RIY	tsv	transcript quantifications	ENCSR000CWE	total RNA-seq	MEL	cell line		mm10	1	1_1
ENCFF219QEJ	tsv	transcript quantifications	ENCSR000CWE	total RNA-seq	MEL	cell line		mm10	2	2_1
ENCFF880SAT	tsv	transcript quantifications	ENCSR000CID	polyA plus RNA-seq	MEL	cell line		mm10	1	1_1
ENCFF203FKR	tsv	transcript quantifications	ENCSR000CID	polyA plus RNA-seq	MEL	cell line		mm10	2	2_1
ENCFF278XPT	tsv	transcript quantifications	ENCSR000CHM	polyA plus RNA-seq	MEL	cell line		mm10	1	1_1
ENCFF781CDV	tsv	transcript quantifications	ENCSR000CHM	polyA plus RNA-seq	MEL	cell line		mm10	2	2_1
ENCFF990ATO	bigWig	read-depth normalized signal	ENCSR000CNN	DNase-seq	MEL	cell line		mm10	1	1_1
ENCFF384WSZ	bigWig	read-depth normalized signal	ENCSR000CNN	DNase-seq	MEL	cell line		mm10	2	2_1
ENCFF056RRE	bigWig	read-depth normalized signal	ENCSR000CNN	DNase-seq	MEL	cell line		mm10	3	3_1
ENCFF145VWQ	bigWig	read-depth normalized signal	ENCSR000CNN	DNase-seq	MEL	cell line		mm10	1	1_1
ENCFF630ILP	bigWig	read-depth normalized signal	ENCSR000CNN	DNase-seq	MEL	cell line		mm10	2	2_1
ENCFF359CLY	bigWig	read-depth normalized signal	ENCSR000CNN	DNase-seq	MEL	cell line		mm10	3	3_1
ENCFF108VAK	bigWig	read-depth normalized signal	ENCSR372SMH	DNase-seq	MEL	cell line		mm10	1	1_1, 1_3
ENCFF226UXQ	bigWig	read-depth normalized signal	ENCSR372SMH	DNase-seq	MEL	cell line		mm10	2	2_1
ENCFF963PGF	bigWig	read-depth normalized signal	ENCSR372SMH	DNase-seq	MEL	cell line		mm10	1	1_1, 1_3
ENCFF394XTF	bigWig	read-depth normalized signal	ENCSR372SMH	DNase-seq	MEL	cell line		mm10	2	2_1
ENCFF132TWB	bigWig	fold change over control	ENCSR000CEX	Histone ChIP-seq	MEL	cell line	H3K4me3-mouse	mm10	1	1_1
ENCFF496UKK	bigWig	fold change over control	ENCSR000CEX	Histone ChIP-seq	MEL	cell line	H3K4me3-mouse	mm10	1, 2	1_1, 2_1
ENCFF999ETR	bigWig	fold change over control	ENCSR000CEX	Histone ChIP-seq	MEL	cell line	H3K4me3-mouse	mm10	2	2_1
ENCFF842OAY	bigWig	fold change over control	ENCSR000CEX	Histone ChIP-seq	MEL	cell line	H3K4me3-mouse	mm10	1	1_1
ENCFF344WXX	bigWig	fold change over control	ENCSR000CEX	Histone ChIP-seq	MEL	cell line	H3K4me3-mouse	mm10	2	2_1
ENCFF430CHA	bigWig	fold change over control	ENCSR000CEX	Histone ChIP-seq	MEL	cell line	H3K4me3-mouse	mm10	1, 2	1_1, 2_1
ENCFF404TDY	bigWig	fold change over control	ENCSR000ADR	Histone ChIP-seq	MEL	cell line	H3K4me3-mouse	mm10	1	1_1
ENCFF116EAC	bigWig	fold change over control	ENCSR000ADR	Histone ChIP-seq	MEL	cell line	H3K4me3-mouse	mm10	2	2_1
ENCFF583MBD	bigWig	fold change over control	ENCSR000ADR	Histone ChIP-seq	MEL	cell line	H3K4me3-mouse	mm10	1, 2	1_1, 2_1
ENCFF225CYA	bigWig	fold change over control	ENCSR000ADR	Histone ChIP-seq	MEL	cell line	H3K4me3-mouse	mm10	1	1_1
ENCFF903ZON	bigWig	fold change over control	ENCSR000ADR	Histone ChIP-seq	MEL	cell line	H3K4me3-mouse	mm10	1, 2	1_1, 2_1
ENCFF864MPD	bigWig	fold change over control	ENCSR000ADR	Histone ChIP-seq	MEL	cell line	H3K4me3-mouse	mm10	2	2_1
ENCFF997SNR	bigWig	fold change over control	ENCSR000CEV	Histone ChIP-seq	MEL	cell line	H3K27ac-mouse	mm10	2	2_1
ENCFF353LFI	bigWig	fold change over control	ENCSR000CEV	Histone ChIP-seq	MEL	cell line	H3K27ac-mouse	mm10	1	1_1
ENCFF414TDD	bigWig	fold change over control	ENCSR000CEV	Histone ChIP-seq	MEL	cell line	H3K27ac-mouse	mm10	1, 2	1_1, 2_1
ENCFF280WKL	bigWig	fold change over control	ENCSR000CEV	Histone ChIP-seq	MEL	cell line	H3K27ac-mouse	mm10	2	2_1
ENCFF073SLS	bigWig	fold change over control	ENCSR000CEV	Histone ChIP-seq	MEL	cell line	H3K27ac-mouse	mm10	1	1_1
ENCFF770LBL	bigWig	fold change over control	ENCSR000CEV	Histone ChIP-seq	MEL	cell line	H3K27ac-mouse	mm10	1, 2	1_1, 2_1
ENCFF515BPN	bigWig	fold change over control	ENCSR000ETQ	TF ChIP-seq	MEL	cell line	CTCF-mouse	mm10	1, 2	1_1, 2_1
ENCFF496YAK	bigWig	fold change over control	ENCSR000ETQ	TF ChIP-seq	MEL	cell line	CTCF-mouse	mm10	2	2_1
ENCFF460LZI	bigWig	fold change over control	ENCSR000ETQ	TF ChIP-seq	MEL	cell line	CTCF-mouse	mm10	1	1_1
ENCFF801OKH	bigWig	fold change over control	ENCSR000ETQ	TF ChIP-seq	MEL	cell line	CTCF-mouse	mm10	2	2_1
ENCFF525CJK	bigWig	fold change over control	ENCSR000ETQ	TF ChIP-seq	MEL	cell line	CTCF-mouse	mm10	1	1_1
ENCFF771JRH	bigWig	fold change over control	ENCSR000ETQ	TF ChIP-seq	MEL	cell line	CTCF-mouse	mm10	1, 2	1_1, 2_1
ENCFF344IDA	bigWig	fold change over control	ENCSR000DIP	TF ChIP-seq	MEL	cell line	CTCF-mouse	mm10	1	1_1
ENCFF117JXG	bigWig	fold change over control	ENCSR000DIP	TF ChIP-seq	MEL	cell line	CTCF-mouse	mm10	2	2_1
ENCFF498RZJ	bigWig	fold change over control	ENCSR000DIP	TF ChIP-seq	MEL	cell line	CTCF-mouse	mm10	1, 2	1_1, 2_1
ENCFF258QKE	bigWig	fold change over control	ENCSR000DIP	TF ChIP-seq	MEL	cell line	CTCF-mouse	mm10	1	1_1
ENCFF576CDJ	bigWig	fold change over control	ENCSR000DIP	TF ChIP-seq	MEL	cell line	CTCF-mouse	mm10	2	2_1
ENCFF798PJA	bigWig	fold change over control	ENCSR000DIP	TF ChIP-seq	MEL	cell line	CTCF-mouse	mm10	1, 2	1_1, 2_1
ENCFF795MJA	bigWig	fold change over control	ENCSR000CFH	TF ChIP-seq	MEL	cell line	CTCF-mouse	mm10	2	2_1
ENCFF244ZJY	bigWig	fold change over control	ENCSR000CFH	TF ChIP-seq	MEL	cell line	CTCF-mouse	mm10	1, 2	1_1, 2_1
ENCFF387HCI	bigWig	fold change over control	ENCSR000CFH	TF ChIP-seq	MEL	cell line	CTCF-mouse	mm10	1	1_1
ENCFF771PZS	bigWig	fold change over control	ENCSR000CFH	TF ChIP-seq	MEL	cell line	CTCF-mouse	mm10	1, 2	1_1, 2_1
ENCFF863SNW	bigWig	fold change over control	ENCSR000CFH	TF ChIP-seq	MEL	cell line	CTCF-mouse	mm10	2	2_1
ENCFF829PWB	bigWig	fold change over control	ENCSR000CFH	TF ChIP-seq	MEL	cell line	CTCF-mouse	mm10	1	1_1
