# Supplementary material for: A scalable computational framework for predicting gene expression from candidate cis -regulatory elements
Source: HighWire-hosted journal article supplement (doi:10.1101/gr.281219.125), 2026-01-16
Supplement: Supplemental_Table_S4.xlsx [file Supplemental_Table_S4.xlsx]

## Sheet: Supplemental_Table_S4
Summary of expanded human data from different cell types/lines in this study
File accession	File format	Output type	Experiment accession	Assay	Biosample term name	Biosample type	Experiment target	Library size range	Biological replicate(s)	Technical replicate(s)
ENCFF461CEJ	tsv	transcript quantifications	ENCSR000COQ	polyA plus RNA-seq	GM12878	cell line		>200	1	1_1
ENCFF891RHZ	tsv	transcript quantifications	ENCSR000COQ	polyA plus RNA-seq	GM12878	cell line		>200	2	2_1
ENCFF150FKV	tsv	transcript quantifications	ENCSR000COQ	polyA plus RNA-seq	GM12878	cell line		>200	2	2_1
ENCFF201ROL	tsv	transcript quantifications	ENCSR000COQ	polyA plus RNA-seq	GM12878	cell line		>200	1	1_1
ENCFF768RJJ	tsv	transcript quantifications	ENCSR000AEE	total RNA-seq	GM12878	cell line		>200	1	1_1
ENCFF907ZEE	tsv	transcript quantifications	ENCSR000AEE	total RNA-seq	GM12878	cell line		>200	2	2_1
ENCFF817VBW	tsv	transcript quantifications	ENCSR000AEE	total RNA-seq	GM12878	cell line		>200	2	2_1
ENCFF204RYI	tsv	transcript quantifications	ENCSR000AEE	total RNA-seq	GM12878	cell line		>200	1	1_1
ENCFF783CHM	tsv	transcript quantifications	ENCSR000AED	polyA plus RNA-seq	GM12878	cell line		>200	1	1_1
ENCFF485OUK	tsv	transcript quantifications	ENCSR000AED	polyA plus RNA-seq	GM12878	cell line		>200	2	2_1
ENCFF673WNZ	tsv	transcript quantifications	ENCSR000AED	polyA plus RNA-seq	GM12878	cell line		>200	1	1_1
ENCFF741PAY	tsv	transcript quantifications	ENCSR000AED	polyA plus RNA-seq	GM12878	cell line		>200	2	2_1
ENCFF939DCB	bigWig	fold change over control	ENCSR000AKH	Histone ChIP-seq	GM12878	cell line	H3K9ac-human		1	1_1
ENCFF182NGV	bigWig	fold change over control	ENCSR000AKH	Histone ChIP-seq	GM12878	cell line	H3K9ac-human		2	2_1
ENCFF028KBY	bigWig	fold change over control	ENCSR000AKH	Histone ChIP-seq	GM12878	cell line	H3K9ac-human		1, 2	1_1, 2_1
ENCFF028DRR	bigWig	fold change over control	ENCSR000AKG	Histone ChIP-seq	GM12878	cell line	H3K4me2-human		1	1_1
ENCFF922IYX	bigWig	fold change over control	ENCSR000AKG	Histone ChIP-seq	GM12878	cell line	H3K4me2-human		2	2_1
ENCFF627OKN	bigWig	fold change over control	ENCSR000AKG	Histone ChIP-seq	GM12878	cell line	H3K4me2-human		1, 2	1_1, 2_1
ENCFF874RRW	bigWig	fold change over control	ENCSR000AKA	Histone ChIP-seq	GM12878	cell line	H3K4me3-human		2	2_1
ENCFF346GYG	bigWig	fold change over control	ENCSR000AKA	Histone ChIP-seq	GM12878	cell line	H3K4me3-human		1	1_1
ENCFF927KAJ	bigWig	fold change over control	ENCSR000AKA	Histone ChIP-seq	GM12878	cell line	H3K4me3-human		1, 2	1_1, 2_1
ENCFF553GSY	bigWig	fold change over control	ENCSR000AOV	Histone ChIP-seq	GM12878	cell line	H2AFZ-human		2	2_1
ENCFF477ZQM	bigWig	fold change over control	ENCSR000AOV	Histone ChIP-seq	GM12878	cell line	H2AFZ-human		1	1_1
ENCFF935EGN	bigWig	fold change over control	ENCSR000AOV	Histone ChIP-seq	GM12878	cell line	H2AFZ-human		1, 2	1_1, 2_1
ENCFF312MUY	bigWig	fold change over control	ENCSR000AKE	Histone ChIP-seq	GM12878	cell line	H3K36me3-human		1, 2	1_1, 2_1
ENCFF269OIU	bigWig	fold change over control	ENCSR000AKE	Histone ChIP-seq	GM12878	cell line	H3K36me3-human		1	1_1
ENCFF831NQV	bigWig	fold change over control	ENCSR000AKE	Histone ChIP-seq	GM12878	cell line	H3K36me3-human		2	2_1
ENCFF224HNL	bigWig	fold change over control	ENCSR000BGD	TF ChIP-seq	GM12878	cell line	POLR2A-human		2	2_1
ENCFF890SYC	bigWig	fold change over control	ENCSR000BGD	TF ChIP-seq	GM12878	cell line	POLR2A-human		1	1_1
ENCFF203NVD	bigWig	fold change over control	ENCSR000BGD	TF ChIP-seq	GM12878	cell line	POLR2A-human		1, 2	1_1, 2_1
ENCFF736CNQ	bigWig	fold change over control	ENCSR000AKD	Histone ChIP-seq	GM12878	cell line	H3K27me3-human		2	2_1
ENCFF119CAV	bigWig	fold change over control	ENCSR000AKD	Histone ChIP-seq	GM12878	cell line	H3K27me3-human		1	1_1
ENCFF919DOR	bigWig	fold change over control	ENCSR000AKD	Histone ChIP-seq	GM12878	cell line	H3K27me3-human		1, 2	1_1, 2_1
ENCFF136ZHC	bigWig	fold change over control	ENCSR000DZD	TF ChIP-seq	GM12878	cell line	EP300-human	150-350	1	1_1
ENCFF482JMC	bigWig	fold change over control	ENCSR000DZD	TF ChIP-seq	GM12878	cell line	EP300-human	150-350	1, 2	1_1, 2_1
ENCFF138QKA	bigWig	fold change over control	ENCSR000DZD	TF ChIP-seq	GM12878	cell line	EP300-human	150-350	2	2_1
ENCFF736DCK	bigWig	fold change over control	ENCSR057BWO	Histone ChIP-seq	GM12878	cell line	H3K4me3-human	200-600	1	1_1
ENCFF736COV	bigWig	fold change over control	ENCSR057BWO	Histone ChIP-seq	GM12878	cell line	H3K4me3-human	200-600	2	2_1
ENCFF287HAO	bigWig	fold change over control	ENCSR057BWO	Histone ChIP-seq	GM12878	cell line	H3K4me3-human	200-600	1, 2	1_1, 2_1
ENCFF785YET	bigWig	fold change over control	ENCSR000AKF	Histone ChIP-seq	GM12878	cell line	H3K4me1-human		1	1_1
ENCFF564KBE	bigWig	fold change over control	ENCSR000AKF	Histone ChIP-seq	GM12878	cell line	H3K4me1-human		1, 2	1_1, 2_1
ENCFF721OOX	bigWig	fold change over control	ENCSR000AKF	Histone ChIP-seq	GM12878	cell line	H3K4me1-human		2	2_1
ENCFF960FMM	bigWig	read-depth normalized signal	ENCSR000EMT	DNase-seq	GM12878	cell line			2	2_1
ENCFF428XFI	bigWig	read-depth normalized signal	ENCSR000EMT	DNase-seq	GM12878	cell line			1	1_1
ENCFF856REE	bigWig	fold change over control	ENCSR000AOX	Histone ChIP-seq	GM12878	cell line	H3K9me3-human		2	2_1
ENCFF698SKV	bigWig	fold change over control	ENCSR000AOX	Histone ChIP-seq	GM12878	cell line	H3K9me3-human		1	1_1
ENCFF683HCZ	bigWig	fold change over control	ENCSR000AOX	Histone ChIP-seq	GM12878	cell line	H3K9me3-human		1, 2, 3	1_1, 2_1, 3_1
ENCFF094AOS	bigWig	fold change over control	ENCSR000AOX	Histone ChIP-seq	GM12878	cell line	H3K9me3-human		3	3_1
ENCFF485CGE	bigWig	fold change over control	ENCSR000DZN	TF ChIP-seq	GM12878	cell line	CTCF-human		1, 2	1_1, 2_1
ENCFF484SOD	bigWig	fold change over control	ENCSR000DZN	TF ChIP-seq	GM12878	cell line	CTCF-human		1	1_1
ENCFF092OIL	bigWig	fold change over control	ENCSR000DZN	TF ChIP-seq	GM12878	cell line	CTCF-human		2	2_1
ENCFF716VWO	bigWig	fold change over control	ENCSR000AKC	Histone ChIP-seq	GM12878	cell line	H3K27ac-human		2	2_1
ENCFF469WVA	bigWig	fold change over control	ENCSR000AKC	Histone ChIP-seq	GM12878	cell line	H3K27ac-human		1, 2	1_1, 2_1
ENCFF458CRP	bigWig	fold change over control	ENCSR000AKC	Histone ChIP-seq	GM12878	cell line	H3K27ac-human		1	1_1
ENCFF040JPE	bigWig	fold change over control	ENCSR000DRW	Histone ChIP-seq	GM12878	cell line	H3K36me3-human		1	1_1
ENCFF115NNN	bigWig	fold change over control	ENCSR000DRW	Histone ChIP-seq	GM12878	cell line	H3K36me3-human		2	2_1
ENCFF380LZI	bigWig	fold change over control	ENCSR000DRW	Histone ChIP-seq	GM12878	cell line	H3K36me3-human		1, 2	1_1, 2_1
ENCFF940GYO	tsv	transcript quantifications	ENCSR000CPH	polyA plus RNA-seq	K562	cell line		>200	2	2_1
ENCFF823JHX	tsv	transcript quantifications	ENCSR000CPH	polyA plus RNA-seq	K562	cell line		>200	1	1_1
ENCFF254AJX	tsv	transcript quantifications	ENCSR000CPH	polyA plus RNA-seq	K562	cell line		>200	1	1_1
ENCFF142FDI	tsv	transcript quantifications	ENCSR000CPH	polyA plus RNA-seq	K562	cell line		>200	2	2_1
ENCFF964MZP	tsv	transcript quantifications	ENCSR000AEP	polyA plus RNA-seq	K562	cell line		>200	1	1_1
ENCFF060YKD	tsv	transcript quantifications	ENCSR000AEP	polyA plus RNA-seq	K562	cell line		>200	2	2_1
ENCFF122TNW	tsv	transcript quantifications	ENCSR000AEP	polyA plus RNA-seq	K562	cell line		>200	1	1_1
ENCFF959YEC	tsv	transcript quantifications	ENCSR000AEP	polyA plus RNA-seq	K562	cell line		>200	2	2_1
ENCFF591YGQ	tsv	transcript quantifications	ENCSR109IQO	total RNA-seq	K562	cell line		>200	1	1_1
ENCFF908CTD	tsv	transcript quantifications	ENCSR109IQO	total RNA-seq	K562	cell line		>200	2	2_1
ENCFF012LGS	tsv	transcript quantifications	ENCSR109IQO	total RNA-seq	K562	cell line		>200	1	1_1
ENCFF714FKW	tsv	transcript quantifications	ENCSR109IQO	total RNA-seq	K562	cell line		>200	2	2_1
ENCFF782UNG	bigWig	fold change over control	ENCSR000AKR	Histone ChIP-seq	K562	cell line	H3K36me3-human		1	1_1
ENCFF860PQP	bigWig	fold change over control	ENCSR000AKR	Histone ChIP-seq	K562	cell line	H3K36me3-human		2	2_1
ENCFF163NTH	bigWig	fold change over control	ENCSR000AKR	Histone ChIP-seq	K562	cell line	H3K36me3-human		1, 2	1_1, 2_1
ENCFF679YZC	bigWig	fold change over control	ENCSR000AKQ	Histone ChIP-seq	K562	cell line	H3K27me3-human		2	2_1
ENCFF585RVP	bigWig	fold change over control	ENCSR000AKQ	Histone ChIP-seq	K562	cell line	H3K27me3-human		1	1_1
ENCFF405HIO	bigWig	fold change over control	ENCSR000AKQ	Histone ChIP-seq	K562	cell line	H3K27me3-human		1, 2	1_1, 2_1
ENCFF545JLB	bigWig	fold change over control	ENCSR000AKU	Histone ChIP-seq	K562	cell line	H3K4me3-human		1	1_1
ENCFF617VRS	bigWig	fold change over control	ENCSR000AKU	Histone ChIP-seq	K562	cell line	H3K4me3-human		2	2_1
ENCFF660WUG	bigWig	fold change over control	ENCSR000AKU	Histone ChIP-seq	K562	cell line	H3K4me3-human		1, 2	1_1, 2_1
ENCFF229IJV	bigWig	fold change over control	ENCSR000AKT	Histone ChIP-seq	K562	cell line	H3K4me2-human		1	1_1
ENCFF386XDJ	bigWig	fold change over control	ENCSR000AKT	Histone ChIP-seq	K562	cell line	H3K4me2-human		2	2_1
ENCFF959YJV	bigWig	fold change over control	ENCSR000AKT	Histone ChIP-seq	K562	cell line	H3K4me2-human		1, 2	1_1, 2_1
ENCFF621DJP	bigWig	fold change over control	ENCSR000APC	Histone ChIP-seq	K562	cell line	H2AFZ-human		1, 2	1_1, 2_1
ENCFF242WQK	bigWig	fold change over control	ENCSR000APC	Histone ChIP-seq	K562	cell line	H2AFZ-human		1	1_1
ENCFF964BCA	bigWig	fold change over control	ENCSR000APC	Histone ChIP-seq	K562	cell line	H2AFZ-human		2	2_1
ENCFF806LCJ	bigWig	fold change over control	ENCSR388QZF	TF ChIP-seq	K562	cell line	POLR2A-human	450-650	1, 2	1_1, 2_1
ENCFF447IUT	bigWig	fold change over control	ENCSR388QZF	TF ChIP-seq	K562	cell line	POLR2A-human	450-650	1	1_1
ENCFF202BSU	bigWig	fold change over control	ENCSR388QZF	TF ChIP-seq	K562	cell line	POLR2A-human	450-650	2	2_1
ENCFF286WRJ	bigWig	fold change over control	ENCSR000AKV	Histone ChIP-seq	K562	cell line	H3K9ac-human		1, 2	1_1, 2_1
ENCFF236VCK	bigWig	fold change over control	ENCSR000AKV	Histone ChIP-seq	K562	cell line	H3K9ac-human		1	1_1
ENCFF650QTM	bigWig	fold change over control	ENCSR000AKV	Histone ChIP-seq	K562	cell line	H3K9ac-human		2	2_1
ENCFF254FRH	bigWig	fold change over control	ENCSR000EGM	TF ChIP-seq	K562	cell line	CTCF-human		1	1_1
ENCFF682MFJ	bigWig	fold change over control	ENCSR000EGM	TF ChIP-seq	K562	cell line	CTCF-human		1, 2	1_1, 2_1
ENCFF952NHK	bigWig	fold change over control	ENCSR000EGM	TF ChIP-seq	K562	cell line	CTCF-human		2	2_1
ENCFF830FQU	bigWig	fold change over control	ENCSR000DWB	Histone ChIP-seq	K562	cell line	H3K36me3-human		2	2_1
ENCFF160XCK	bigWig	fold change over control	ENCSR000DWB	Histone ChIP-seq	K562	cell line	H3K36me3-human		1	1_1
ENCFF347YYH	bigWig	fold change over control	ENCSR000DWB	Histone ChIP-seq	K562	cell line	H3K36me3-human		1, 2	1_1, 2_1
ENCFF414OGC	bigWig	read-depth normalized signal	ENCSR000EOT	DNase-seq	K562	cell line			1	1_1, 1_2
ENCFF338LXW	bigWig	read-depth normalized signal	ENCSR000EOT	DNase-seq	K562	cell line			2	2_1
ENCFF977KGH	bigWig	fold change over control	ENCSR000AKP	Histone ChIP-seq	K562	cell line	H3K27ac-human		1	1_1
ENCFF745TSK	bigWig	fold change over control	ENCSR000AKP	Histone ChIP-seq	K562	cell line	H3K27ac-human		2	2_1
ENCFF849TDM	bigWig	fold change over control	ENCSR000AKP	Histone ChIP-seq	K562	cell line	H3K27ac-human		1, 2	1_1, 2_1
ENCFF155DUF	bigWig	fold change over control	ENCSR000EGE	TF ChIP-seq	K562	cell line	EP300-human		1	1_1
ENCFF513GVS	bigWig	fold change over control	ENCSR000EGE	TF ChIP-seq	K562	cell line	EP300-human		2	2_1
ENCFF636VVR	bigWig	fold change over control	ENCSR000EGE	TF ChIP-seq	K562	cell line	EP300-human		1, 2	1_1, 2_1
ENCFF490RQD	bigWig	fold change over control	ENCSR000AKS	Histone ChIP-seq	K562	cell line	H3K4me1-human		1	1_1
ENCFF149FZG	bigWig	fold change over control	ENCSR000AKS	Histone ChIP-seq	K562	cell line	H3K4me1-human		2	2_1
ENCFF834SEY	bigWig	fold change over control	ENCSR000AKS	Histone ChIP-seq	K562	cell line	H3K4me1-human		1, 2	1_1, 2_1
ENCFF103IHG	bigWig	fold change over control	ENCSR000APE	Histone ChIP-seq	K562	cell line	H3K9me3-human		1	1_1
ENCFF600IBI	bigWig	fold change over control	ENCSR000APE	Histone ChIP-seq	K562	cell line	H3K9me3-human		2	2_1
ENCFF601JGK	bigWig	fold change over control	ENCSR000APE	Histone ChIP-seq	K562	cell line	H3K9me3-human		1, 2	1_1, 2_1
ENCFF253TOF	bigWig	fold change over control	ENCSR668LDD	Histone ChIP-seq	K562	cell line	H3K4me3-human	200-600	1, 2	1_1, 2_1
ENCFF089RDX	bigWig	fold change over control	ENCSR668LDD	Histone ChIP-seq	K562	cell line	H3K4me3-human	200-600	1	1_1
ENCFF941IYM	bigWig	fold change over control	ENCSR668LDD	Histone ChIP-seq	K562	cell line	H3K4me3-human	200-600	2	2_1
ENCFF036VRF	bigWig	fold change over control	ENCSR000EWB	Histone ChIP-seq	K562	cell line	H3K27me3-human		1	1_1
ENCFF971QDI	bigWig	fold change over control	ENCSR000EWB	Histone ChIP-seq	K562	cell line	H3K27me3-human		2	2_1
ENCFF139KZL	bigWig	fold change over control	ENCSR000EWB	Histone ChIP-seq	K562	cell line	H3K27me3-human		1, 2	1_1, 2_1
