# Supplementary material for: A scalable computational framework for predicting gene expression from candidate cis -regulatory elements
Source: HighWire-hosted journal article supplement (doi:10.1101/gr.281219.125), 2026-01-16
Supplement: Supplemental_Table_S5.xlsx [file Supplemental_Table_S5.xlsx]

## Sheet: Supplemental_Table_S5
Summary of chromatin loops from GM12878 at the 5kb resolution
chr1	775000	780000	chr1:805000-810000	3.85534
chr1	775000	780000	chr1:820000-825000	14.4085
chr1	805000	810000	chr1:775000-780000	3.85534
chr1	820000	825000	chr1:775000-780000	14.4085
chr1	900000	905000	chr1:975000-980000	5.38739
chr1	955000	960000	chr1:1060000-1065000	2.32504
chr1	960000	965000	chr1:1060000-1065000	2.24032
chr1	965000	970000	chr1:1060000-1065000	4.89204
chr1	975000	980000	chr1:900000-905000	5.38739
chr1	990000	995000	chr1:1010000-1015000	11.128
chr1	990000	995000	chr1:1030000-1035000	2.76303
chr1	990000	995000	chr1:1060000-1065000	8.14582
chr1	1000000	1005000	chr1:1060000-1065000	2.27293
chr1	1010000	1015000	chr1:1060000-1065000	2.68665
chr1	1010000	1015000	chr1:1065000-1070000	5.13998
chr1	1010000	1015000	chr1:1230000-1235000	3.02738
chr1	1010000	1015000	chr1:1250000-1255000	2.89556
chr1	1010000	1015000	chr1:1270000-1275000	3.23654
chr1	1010000	1015000	chr1:1305000-1310000	2.71875
chr1	1010000	1015000	chr1:990000-995000	11.128
chr1	1015000	1020000	chr1:1060000-1065000	9.29472
chr1	1020000	1025000	chr1:1060000-1065000	8.47524
chr1	1030000	1035000	chr1:1060000-1065000	13.5076
chr1	1030000	1035000	chr1:1250000-1255000	2.93053
chr1	1030000	1035000	chr1:990000-995000	2.76303
chr1	1060000	1065000	chr1:1000000-1005000	2.27293
chr1	1060000	1065000	chr1:1010000-1015000	2.68665
chr1	1060000	1065000	chr1:1015000-1020000	9.29472
chr1	1060000	1065000	chr1:1020000-1025000	8.47524
chr1	1060000	1065000	chr1:1030000-1035000	13.5076
chr1	1060000	1065000	chr1:1095000-1100000	4.83074
chr1	1060000	1065000	chr1:1205000-1210000	6.32434
chr1	1060000	1065000	chr1:1250000-1255000	8.82439
chr1	1060000	1065000	chr1:955000-960000	2.32504
chr1	1060000	1065000	chr1:960000-965000	2.24032
chr1	1060000	1065000	chr1:965000-970000	4.89204
chr1	1060000	1065000	chr1:990000-995000	8.14582
chr1	1065000	1070000	chr1:1010000-1015000	5.13998
chr1	1095000	1100000	chr1:1060000-1065000	4.83074
chr1	1095000	1100000	chr1:1250000-1255000	2.55278
chr1	1095000	1100000	chr1:1270000-1275000	3.50928
chr1	1135000	1140000	chr1:1170000-1175000	4.37396
chr1	1135000	1140000	chr1:1205000-1210000	5.4794
chr1	1135000	1140000	chr1:1215000-1220000	3.06754
chr1	1135000	1140000	chr1:1230000-1235000	4.93987
chr1	1135000	1140000	chr1:1240000-1245000	2.14581
chr1	1135000	1140000	chr1:1245000-1250000	2.42614
chr1	1140000	1145000	chr1:1230000-1235000	3.32114
chr1	1140000	1145000	chr1:1250000-1255000	2.66673
chr1	1145000	1150000	chr1:1170000-1175000	4.22072
chr1	1145000	1150000	chr1:1230000-1235000	2.02884
chr1	1145000	1150000	chr1:1250000-1255000	2.64534
chr1	1155000	1160000	chr1:1205000-1210000	3.79849
chr1	1155000	1160000	chr1:1230000-1235000	4.7441
chr1	1155000	1160000	chr1:1270000-1275000	2.47574
chr1	1170000	1175000	chr1:1135000-1140000	4.37396
chr1	1170000	1175000	chr1:1145000-1150000	4.22072
chr1	1170000	1175000	chr1:1200000-1205000	3.69899
chr1	1170000	1175000	chr1:1205000-1210000	2.45938
chr1	1170000	1175000	chr1:1230000-1235000	3.86897
chr1	1200000	1205000	chr1:1170000-1175000	3.69899
chr1	1205000	1210000	chr1:1060000-1065000	6.32434
chr1	1205000	1210000	chr1:1135000-1140000	5.4794
chr1	1205000	1210000	chr1:1155000-1160000	3.79849
chr1	1205000	1210000	chr1:1170000-1175000	2.45938
chr1	1215000	1220000	chr1:1135000-1140000	3.06754
chr1	1230000	1235000	chr1:1010000-1015000	3.02738
chr1	1230000	1235000	chr1:1135000-1140000	4.93987
chr1	1230000	1235000	chr1:1140000-1145000	3.32114
chr1	1230000	1235000	chr1:1145000-1150000	2.02884
chr1	1230000	1235000	chr1:1155000-1160000	4.7441
chr1	1230000	1235000	chr1:1170000-1175000	3.86897
chr1	1230000	1235000	chr1:1250000-1255000	2.11465
chr1	1240000	1245000	chr1:1135000-1140000	2.14581
chr1	1245000	1250000	chr1:1135000-1140000	2.42614
chr1	1250000	1255000	chr1:1010000-1015000	2.89556
chr1	1250000	1255000	chr1:1030000-1035000	2.93053
chr1	1250000	1255000	chr1:1060000-1065000	8.82439
chr1	1250000	1255000	chr1:1095000-1100000	2.55278
chr1	1250000	1255000	chr1:1140000-1145000	2.66673
chr1	1250000	1255000	chr1:1145000-1150000	2.64534
chr1	1250000	1255000	chr1:1230000-1235000	2.11465
chr1	1250000	1255000	chr1:1270000-1275000	6.77622
chr1	1270000	1275000	chr1:1010000-1015000	3.23654
chr1	1270000	1275000	chr1:1095000-1100000	3.50928
chr1	1270000	1275000	chr1:1155000-1160000	2.47574
chr1	1270000	1275000	chr1:1250000-1255000	6.77622
chr1	1305000	1310000	chr1:1010000-1015000	2.71875
chr1	1305000	1310000	chr1:1505000-1510000	2.1314
chr1	1320000	1325000	chr1:1460000-1465000	3.36359
chr1	1320000	1325000	chr1:1510000-1515000	3.89102
chr1	1375000	1380000	chr1:1395000-1400000	2.51708
chr1	1375000	1380000	chr1:1435000-1440000	5.4427
chr1	1375000	1380000	chr1:1500000-1505000	3.77277
chr1	1375000	1380000	chr1:1505000-1510000	3.69761
chr1	1375000	1380000	chr1:1510000-1515000	9.76649
chr1	1395000	1400000	chr1:1375000-1380000	2.51708
chr1	1395000	1400000	chr1:1435000-1440000	9.33445
chr1	1395000	1400000	chr1:1460000-1465000	3.17099
chr1	1395000	1400000	chr1:1465000-1470000	6.65969
chr1	1395000	1400000	chr1:1470000-1475000	2.97009
chr1	1395000	1400000	chr1:1505000-1510000	4.55095
chr1	1395000	1400000	chr1:1510000-1515000	3.1713
chr1	1400000	1405000	chr1:1435000-1440000	5.37718
chr1	1400000	1405000	chr1:1470000-1475000	3.28209
chr1	1400000	1405000	chr1:1505000-1510000	2.27542
chr1	1400000	1405000	chr1:1510000-1515000	2.09806
chr1	1405000	1410000	chr1:1435000-1440000	20.6537
chr1	1405000	1410000	chr1:1460000-1465000	3.57995
chr1	1405000	1410000	chr1:1505000-1510000	4.00438
chr1	1405000	1410000	chr1:1510000-1515000	2.25912
chr1	1410000	1415000	chr1:1435000-1440000	4.26623
chr1	1410000	1415000	chr1:1460000-1465000	2.60615
chr1	1415000	1420000	chr1:1435000-1440000	18.1691
chr1	1435000	1440000	chr1:1375000-1380000	5.4427
chr1	1435000	1440000	chr1:1395000-1400000	9.33445
chr1	1435000	1440000	chr1:1400000-1405000	5.37718
chr1	1435000	1440000	chr1:1405000-1410000	20.6537
chr1	1435000	1440000	chr1:1410000-1415000	4.26623
chr1	1435000	1440000	chr1:1415000-1420000	18.1691
chr1	1435000	1440000	chr1:1460000-1465000	2.70944
chr1	1460000	1465000	chr1:1320000-1325000	3.36359
chr1	1460000	1465000	chr1:1395000-1400000	3.17099
chr1	1460000	1465000	chr1:1405000-1410000	3.57995
chr1	1460000	1465000	chr1:1410000-1415000	2.60615
chr1	1460000	1465000	chr1:1435000-1440000	2.70944
chr1	1465000	1470000	chr1:1395000-1400000	6.65969
chr1	1470000	1475000	chr1:1395000-1400000	2.97009
chr1	1470000	1475000	chr1:1400000-1405000	3.28209
chr1	1500000	1505000	chr1:1375000-1380000	3.77277
chr1	1505000	1510000	chr1:1305000-1310000	2.1314
chr1	1505000	1510000	chr1:1375000-1380000	3.69761
chr1	1505000	1510000	chr1:1395000-1400000	4.55095
chr1	1505000	1510000	chr1:1400000-1405000	2.27542
chr1	1505000	1510000	chr1:1405000-1410000	4.00438
chr1	1510000	1515000	chr1:1320000-1325000	3.89102
chr1	1510000	1515000	chr1:1375000-1380000	9.76649
chr1	1510000	1515000	chr1:1395000-1400000	3.1713
chr1	1510000	1515000	chr1:1400000-1405000	2.09806
chr1	1510000	1515000	chr1:1405000-1410000	2.25912
chr1	1655000	1660000	chr1:1675000-1680000	2.2015
chr1	1655000	1660000	chr1:1720000-1725000	9.01555
chr1	1660000	1665000	chr1:1725000-1730000	9.70233
chr1	1675000	1680000	chr1:1655000-1660000	2.2015
chr1	1675000	1680000	chr1:1745000-1750000	12.9327
chr1	1685000	1690000	chr1:1745000-1750000	7.89204
chr1	1690000	1695000	chr1:1740000-1745000	2.38091
chr1	1690000	1695000	chr1:1745000-1750000	15.9957
chr1	1720000	1725000	chr1:1655000-1660000	9.01555
chr1	1725000	1730000	chr1:1660000-1665000	9.70233
chr1	1740000	1745000	chr1:1690000-1695000	2.38091
chr1	1745000	1750000	chr1:1675000-1680000	12.9327
chr1	1745000	1750000	chr1:1685000-1690000	7.89204
chr1	1745000	1750000	chr1:1690000-1695000	15.9957
chr1	1765000	1770000	chr1:1905000-1910000	8.60465
chr1	1770000	1775000	chr1:1905000-1910000	5.91417
chr1	1775000	1780000	chr1:1825000-1830000	2.22579
chr1	1775000	1780000	chr1:1835000-1840000	2.12512
chr1	1775000	1780000	chr1:1885000-1890000	3.27126
chr1	1775000	1780000	chr1:1890000-1895000	5.77943
chr1	1775000	1780000	chr1:1895000-1900000	4.84415
chr1	1775000	1780000	chr1:1900000-1905000	3.95161
chr1	1775000	1780000	chr1:1905000-1910000	41.7081
chr1	1780000	1785000	chr1:1825000-1830000	3.10017
chr1	1780000	1785000	chr1:1905000-1910000	24.7056
chr1	1795000	1800000	chr1:1905000-1910000	4.82306
chr1	1825000	1830000	chr1:1775000-1780000	2.22579
chr1	1825000	1830000	chr1:1780000-1785000	3.10017
chr1	1825000	1830000	chr1:1905000-1910000	17.3289
chr1	1830000	1835000	chr1:1885000-1890000	4.37522
chr1	1830000	1835000	chr1:1905000-1910000	7.49482
chr1	1835000	1840000	chr1:1775000-1780000	2.12512
chr1	1835000	1840000	chr1:1900000-1905000	2.34277
chr1	1860000	1865000	chr1:1905000-1910000	2.09332
chr1	1885000	1890000	chr1:1775000-1780000	3.27126
chr1	1885000	1890000	chr1:1830000-1835000	4.37522
chr1	1890000	1895000	chr1:1775000-1780000	5.77943
chr1	1895000	1900000	chr1:1775000-1780000	4.84415
chr1	1900000	1905000	chr1:1775000-1780000	3.95161
chr1	1900000	1905000	chr1:1835000-1840000	2.34277
chr1	1905000	1910000	chr1:1765000-1770000	8.60465
chr1	1905000	1910000	chr1:1770000-1775000	5.91417
chr1	1905000	1910000	chr1:1775000-1780000	41.7081
chr1	1905000	1910000	chr1:1780000-1785000	24.7056
chr1	1905000	1910000	chr1:1795000-1800000	4.82306
chr1	1905000	1910000	chr1:1825000-1830000	17.3289
chr1	1905000	1910000	chr1:1830000-1835000	7.49482
chr1	1905000	1910000	chr1:1860000-1865000	2.09332
chr1	1905000	1910000	chr1:2545000-2550000	2.12513
chr1	1905000	1910000	chr1:2575000-2580000	2.71839
chr1	2190000	2195000	chr1:2375000-2380000	7.22465
chr1	2190000	2195000	chr1:2385000-2390000	5.38339
chr1	2190000	2195000	chr1:2390000-2395000	3.54788
chr1	2190000	2195000	chr1:2395000-2400000	6.28847
chr1	2190000	2195000	chr1:2410000-2415000	2.99385
chr1	2190000	2195000	chr1:2545000-2550000	6.02569
chr1	2190000	2195000	chr1:2575000-2580000	4.72256
chr1	2195000	2200000	chr1:2300000-2305000	6.27451
chr1	2195000	2200000	chr1:2375000-2380000	9.66959
chr1	2195000	2200000	chr1:2385000-2390000	7.41256
chr1	2195000	2200000	chr1:2390000-2395000	7.48183
chr1	2195000	2200000	chr1:2410000-2415000	10.2481
chr1	2195000	2200000	chr1:2545000-2550000	8.56909
chr1	2230000	2235000	chr1:2255000-2260000	8.46605
chr1	2230000	2235000	chr1:2300000-2305000	7.08796
chr1	2255000	2260000	chr1:2230000-2235000	8.46605
chr1	2255000	2260000	chr1:2285000-2290000	4.70371
chr1	2255000	2260000	chr1:2300000-2305000	3.2888
chr1	2285000	2290000	chr1:2255000-2260000	4.70371
chr1	2300000	2305000	chr1:2195000-2200000	6.27451
chr1	2300000	2305000	chr1:2230000-2235000	7.08796
chr1	2300000	2305000	chr1:2255000-2260000	3.2888
chr1	2375000	2380000	chr1:2190000-2195000	7.22465
chr1	2375000	2380000	chr1:2195000-2200000	9.66959
chr1	2385000	2390000	chr1:2190000-2195000	5.38339
chr1	2385000	2390000	chr1:2195000-2200000	7.41256
chr1	2390000	2395000	chr1:2190000-2195000	3.54788
chr1	2390000	2395000	chr1:2195000-2200000	7.48183
chr1	2390000	2395000	chr1:2410000-2415000	4.76921
chr1	2390000	2395000	chr1:2545000-2550000	9.71028
chr1	2390000	2395000	chr1:2575000-2580000	4.45442
chr1	2390000	2395000	chr1:2585000-2590000	2.61554
chr1	2395000	2400000	chr1:2190000-2195000	6.28847
chr1	2395000	2400000	chr1:2545000-2550000	7.31545
chr1	2395000	2400000	chr1:2575000-2580000	3.47259
chr1	2410000	2415000	chr1:2190000-2195000	2.99385
chr1	2410000	2415000	chr1:2195000-2200000	10.2481
chr1	2410000	2415000	chr1:2390000-2395000	4.76921
chr1	2410000	2415000	chr1:2495000-2500000	2.35351
chr1	2410000	2415000	chr1:2520000-2525000	7.65998
chr1	2410000	2415000	chr1:2525000-2530000	6.67091
chr1	2410000	2415000	chr1:2540000-2545000	3.79544
chr1	2410000	2415000	chr1:2545000-2550000	115.94
chr1	2410000	2415000	chr1:2550000-2555000	10.1826
chr1	2410000	2415000	chr1:2555000-2560000	11.8158
chr1	2410000	2415000	chr1:2575000-2580000	18.2768
chr1	2410000	2415000	chr1:2580000-2585000	13.1537
chr1	2410000	2415000	chr1:2585000-2590000	12.0413
chr1	2410000	2415000	chr1:2780000-2785000	3.20248
chr1	2415000	2420000	chr1:2545000-2550000	5.83287
chr1	2420000	2425000	chr1:2545000-2550000	3.26042
chr1	2425000	2430000	chr1:2545000-2550000	6.28554
chr1	2430000	2435000	chr1:2545000-2550000	6.04567
chr1	2495000	2500000	chr1:2410000-2415000	2.35351
chr1	2495000	2500000	chr1:2545000-2550000	2.52547
chr1	2520000	2525000	chr1:2410000-2415000	7.65998
chr1	2520000	2525000	chr1:2545000-2550000	2.02184
chr1	2525000	2530000	chr1:2410000-2415000	6.67091
chr1	2525000	2530000	chr1:2545000-2550000	18.4821
chr1	2525000	2530000	chr1:2575000-2580000	2.60423
chr1	2540000	2545000	chr1:2410000-2415000	3.79544
chr1	2545000	2550000	chr1:1905000-1910000	2.12513
chr1	2545000	2550000	chr1:2190000-2195000	6.02569
chr1	2545000	2550000	chr1:2195000-2200000	8.56909
chr1	2545000	2550000	chr1:2390000-2395000	9.71028
chr1	2545000	2550000	chr1:2395000-2400000	7.31545
chr1	2545000	2550000	chr1:2410000-2415000	115.94
chr1	2545000	2550000	chr1:2415000-2420000	5.83287
chr1	2545000	2550000	chr1:2420000-2425000	3.26042
chr1	2545000	2550000	chr1:2425000-2430000	6.28554
chr1	2545000	2550000	chr1:2430000-2435000	6.04567
chr1	2545000	2550000	chr1:2495000-2500000	2.52547
chr1	2545000	2550000	chr1:2520000-2525000	2.02184
chr1	2545000	2550000	chr1:2525000-2530000	18.4821
chr1	2545000	2550000	chr1:2570000-2575000	3.0746
chr1	2545000	2550000	chr1:2575000-2580000	31.0213
chr1	2545000	2550000	chr1:2580000-2585000	18.0142
chr1	2545000	2550000	chr1:2585000-2590000	9.98678
chr1	2545000	2550000	chr1:3655000-3660000	4.59771
chr1	2545000	2550000	chr1:3660000-3665000	3.90712
chr1	2545000	2550000	chr1:3665000-3670000	2.62407
chr1	2550000	2555000	chr1:2410000-2415000	10.1826
chr1	2550000	2555000	chr1:2575000-2580000	6.40712
chr1	2555000	2560000	chr1:2410000-2415000	11.8158
chr1	2555000	2560000	chr1:2575000-2580000	16.9955
chr1	2555000	2560000	chr1:2580000-2585000	9.58451
chr1	2570000	2575000	chr1:2545000-2550000	3.0746
chr1	2575000	2580000	chr1:1905000-1910000	2.71839
chr1	2575000	2580000	chr1:2190000-2195000	4.72256
chr1	2575000	2580000	chr1:2390000-2395000	4.45442
chr1	2575000	2580000	chr1:2395000-2400000	3.47259
chr1	2575000	2580000	chr1:2410000-2415000	18.2768
chr1	2575000	2580000	chr1:2525000-2530000	2.60423
chr1	2575000	2580000	chr1:2545000-2550000	31.0213
chr1	2575000	2580000	chr1:2550000-2555000	6.40712
chr1	2575000	2580000	chr1:2555000-2560000	16.9955
chr1	2575000	2580000	chr1:3655000-3660000	5.97227
chr1	2580000	2585000	chr1:2410000-2415000	13.1537
chr1	2580000	2585000	chr1:2545000-2550000	18.0142
chr1	2580000	2585000	chr1:2555000-2560000	9.58451
chr1	2580000	2585000	chr1:3655000-3660000	2.30798
chr1	2585000	2590000	chr1:2390000-2395000	2.61554
chr1	2585000	2590000	chr1:2410000-2415000	12.0413
chr1	2585000	2590000	chr1:2545000-2550000	9.98678
chr1	2585000	2590000	chr1:2635000-2640000	2.90924
chr1	2635000	2640000	chr1:2585000-2590000	2.90924
chr1	2780000	2785000	chr1:2410000-2415000	3.20248
chr1	3620000	3625000	chr1:3675000-3680000	4.27819
chr1	3625000	3630000	chr1:3675000-3680000	3.76047
chr1	3650000	3655000	chr1:3675000-3680000	25.1989
chr1	3655000	3660000	chr1:2545000-2550000	4.59771
chr1	3655000	3660000	chr1:2575000-2580000	5.97227
chr1	3655000	3660000	chr1:2580000-2585000	2.30798
chr1	3655000	3660000	chr1:3675000-3680000	39.4801
chr1	3660000	3665000	chr1:2545000-2550000	3.90712
chr1	3665000	3670000	chr1:2545000-2550000	2.62407
chr1	3675000	3680000	chr1:3620000-3625000	4.27819
chr1	3675000	3680000	chr1:3625000-3630000	3.76047
chr1	3675000	3680000	chr1:3650000-3655000	25.1989
chr1	3675000	3680000	chr1:3655000-3660000	39.4801
chr1	3675000	3680000	chr1:3720000-3725000	7.6281
chr1	3720000	3725000	chr1:3675000-3680000	7.6281
chr1	3775000	3780000	chr1:3795000-3800000	4.20132
chr1	3795000	3800000	chr1:3775000-3780000	4.20132
chr1	3855000	3860000	chr1:3895000-3900000	5.2021
chr1	3895000	3900000	chr1:3855000-3860000	5.2021
chr1	4265000	4270000	chr1:4340000-4345000	5.30904
chr1	4265000	4270000	chr1:4345000-4350000	2.27796
chr1	4340000	4345000	chr1:4265000-4270000	5.30904
chr1	4345000	4350000	chr1:4265000-4270000	2.27796
chr1	4790000	4795000	chr1:4825000-4830000	2.06518
chr1	4790000	4795000	chr1:4845000-4850000	9.21493
chr1	4790000	4795000	chr1:4850000-4855000	2.06783
chr1	4790000	4795000	chr1:4855000-4860000	3.0878
chr1	4795000	4800000	chr1:4830000-4835000	2.24623
chr1	4795000	4800000	chr1:4845000-4850000	9.58198
chr1	4795000	4800000	chr1:4850000-4855000	4.59336
chr1	4825000	4830000	chr1:4790000-4795000	2.06518
chr1	4825000	4830000	chr1:4845000-4850000	3.84313
chr1	4830000	4835000	chr1:4795000-4800000	2.24623
chr1	4845000	4850000	chr1:4790000-4795000	9.21493
chr1	4845000	4850000	chr1:4795000-4800000	9.58198
chr1	4845000	4850000	chr1:4825000-4830000	3.84313
chr1	4850000	4855000	chr1:4790000-4795000	2.06783
chr1	4850000	4855000	chr1:4795000-4800000	4.59336
chr1	4855000	4860000	chr1:4790000-4795000	3.0878
chr1	5990000	5995000	chr1:6025000-6030000	4.51733
chr1	5995000	6000000	chr1:6025000-6030000	2.96233
chr1	6005000	6010000	chr1:6025000-6030000	2.61586
chr1	6025000	6030000	chr1:5990000-5995000	4.51733
chr1	6025000	6030000	chr1:5995000-6000000	2.96233
chr1	6025000	6030000	chr1:6005000-6010000	2.61586
chr1	6025000	6030000	chr1:6195000-6200000	2.27241
chr1	6025000	6030000	chr1:6200000-6205000	2.03965
chr1	6025000	6030000	chr1:6205000-6210000	2.85348
chr1	6195000	6200000	chr1:6025000-6030000	2.27241
chr1	6195000	6200000	chr1:6235000-6240000	2.03612
chr1	6195000	6200000	chr1:6390000-6395000	3.50664
chr1	6195000	6200000	chr1:6410000-6415000	2.43434
chr1	6200000	6205000	chr1:6025000-6030000	2.03965
chr1	6200000	6205000	chr1:6410000-6415000	2.6995
chr1	6205000	6210000	chr1:6025000-6030000	2.85348
chr1	6205000	6210000	chr1:6230000-6235000	2.10344
chr1	6215000	6220000	chr1:6410000-6415000	2.04871
chr1	6230000	6235000	chr1:6205000-6210000	2.10344
chr1	6230000	6235000	chr1:6410000-6415000	7.01734
chr1	6235000	6240000	chr1:6195000-6200000	2.03612
chr1	6235000	6240000	chr1:6355000-6360000	2.13895
chr1	6235000	6240000	chr1:6410000-6415000	3.83793
chr1	6265000	6270000	chr1:6290000-6295000	4.06278
chr1	6290000	6295000	chr1:6265000-6270000	4.06278
chr1	6290000	6295000	chr1:6310000-6315000	3.80419
chr1	6290000	6295000	chr1:6340000-6345000	3.86212
chr1	6310000	6315000	chr1:6290000-6295000	3.80419
chr1	6340000	6345000	chr1:6290000-6295000	3.86212
chr1	6340000	6345000	chr1:6410000-6415000	4.01498
chr1	6345000	6350000	chr1:6390000-6395000	3.54036
chr1	6345000	6350000	chr1:6400000-6405000	5.13715
chr1	6345000	6350000	chr1:6410000-6415000	3.44481
chr1	6355000	6360000	chr1:6235000-6240000	2.13895
chr1	6355000	6360000	chr1:6390000-6395000	18.9431
chr1	6355000	6360000	chr1:6395000-6400000	18.4585
chr1	6355000	6360000	chr1:6400000-6405000	30.3067
chr1	6355000	6360000	chr1:6410000-6415000	6.37282
chr1	6360000	6365000	chr1:6390000-6395000	8.9503
chr1	6360000	6365000	chr1:6400000-6405000	3.88163
chr1	6360000	6365000	chr1:6410000-6415000	2.73883
chr1	6390000	6395000	chr1:6195000-6200000	3.50664
chr1	6390000	6395000	chr1:6345000-6350000	3.54036
chr1	6390000	6395000	chr1:6355000-6360000	18.9431
chr1	6390000	6395000	chr1:6360000-6365000	8.9503
chr1	6395000	6400000	chr1:6355000-6360000	18.4585
chr1	6400000	6405000	chr1:6345000-6350000	5.13715
chr1	6400000	6405000	chr1:6355000-6360000	30.3067
chr1	6400000	6405000	chr1:6360000-6365000	3.88163
chr1	6410000	6415000	chr1:6195000-6200000	2.43434
chr1	6410000	6415000	chr1:6200000-6205000	2.6995
chr1	6410000	6415000	chr1:6215000-6220000	2.04871
chr1	6410000	6415000	chr1:6230000-6235000	7.01734
chr1	6410000	6415000	chr1:6235000-6240000	3.83793
chr1	6410000	6415000	chr1:6340000-6345000	4.01498
chr1	6410000	6415000	chr1:6345000-6350000	3.44481
chr1	6410000	6415000	chr1:6355000-6360000	6.37282
chr1	6410000	6415000	chr1:6360000-6365000	2.73883
chr1	6410000	6415000	chr1:6435000-6440000	11.5938
chr1	6435000	6440000	chr1:6410000-6415000	11.5938
chr1	6490000	6495000	chr1:6510000-6515000	2.79315
chr1	6490000	6495000	chr1:6550000-6555000	2.12944
chr1	6490000	6495000	chr1:6625000-6630000	5.08984
chr1	6510000	6515000	chr1:6490000-6495000	2.79315
chr1	6550000	6555000	chr1:6490000-6495000	2.12944
chr1	6625000	6630000	chr1:6490000-6495000	5.08984
chr1	6700000	6705000	chr1:6780000-6785000	2.85291
chr1	6700000	6705000	chr1:6820000-6825000	3.25735
chr1	6720000	6725000	chr1:6775000-6780000	5.35487
chr1	6720000	6725000	chr1:6865000-6870000	5.30226
chr1	6740000	6745000	chr1:6775000-6780000	3.93988
chr1	6740000	6745000	chr1:6780000-6785000	5.08054
chr1	6740000	6745000	chr1:6820000-6825000	5.92332
chr1	6740000	6745000	chr1:7400000-7405000	3.78738
chr1	6745000	6750000	chr1:6775000-6780000	7.6798
chr1	6745000	6750000	chr1:6780000-6785000	2.86613
chr1	6745000	6750000	chr1:7400000-7405000	5.67134
chr1	6775000	6780000	chr1:6720000-6725000	5.35487
chr1	6775000	6780000	chr1:6740000-6745000	3.93988
chr1	6775000	6780000	chr1:6745000-6750000	7.6798
chr1	6780000	6785000	chr1:6700000-6705000	2.85291
chr1	6780000	6785000	chr1:6740000-6745000	5.08054
chr1	6780000	6785000	chr1:6745000-6750000	2.86613
chr1	6785000	6790000	chr1:6820000-6825000	5.78619
chr1	6800000	6805000	chr1:6820000-6825000	9.19367
chr1	6815000	6820000	chr1:7400000-7405000	3.8278
chr1	6820000	6825000	chr1:6700000-6705000	3.25735
chr1	6820000	6825000	chr1:6740000-6745000	5.92332
chr1	6820000	6825000	chr1:6785000-6790000	5.78619
chr1	6820000	6825000	chr1:6800000-6805000	9.19367
chr1	6820000	6825000	chr1:6855000-6860000	5.06028
chr1	6820000	6825000	chr1:6860000-6865000	10.5545
chr1	6820000	6825000	chr1:6865000-6870000	12.2598
chr1	6820000	6825000	chr1:6880000-6885000	15.4514
chr1	6820000	6825000	chr1:6890000-6895000	8.28258
chr1	6820000	6825000	chr1:7400000-7405000	10.0945
chr1	6820000	6825000	chr1:8095000-8100000	3.22398
chr1	6820000	6825000	chr1:8180000-8185000	3.51134
chr1	6825000	6830000	chr1:6860000-6865000	3.28161
chr1	6830000	6835000	chr1:6860000-6865000	2.74634
chr1	6855000	6860000	chr1:6820000-6825000	5.06028
chr1	6860000	6865000	chr1:6820000-6825000	10.5545
chr1	6860000	6865000	chr1:6825000-6830000	3.28161
chr1	6860000	6865000	chr1:6830000-6835000	2.74634
chr1	6860000	6865000	chr1:7400000-7405000	2.56095
chr1	6865000	6870000	chr1:6720000-6725000	5.30226
chr1	6865000	6870000	chr1:6820000-6825000	12.2598
chr1	6880000	6885000	chr1:6820000-6825000	15.4514
chr1	6890000	6895000	chr1:6820000-6825000	8.28258
chr1	7265000	7270000	chr1:7400000-7405000	2.26795
chr1	7400000	7405000	chr1:6740000-6745000	3.78738
chr1	7400000	7405000	chr1:6745000-6750000	5.67134
chr1	7400000	7405000	chr1:6815000-6820000	3.8278
chr1	7400000	7405000	chr1:6820000-6825000	10.0945
chr1	7400000	7405000	chr1:6860000-6865000	2.56095
chr1	7400000	7405000	chr1:7265000-7270000	2.26795
chr1	7400000	7405000	chr1:7435000-7440000	2.92258
chr1	7400000	7405000	chr1:7450000-7455000	5.78702
chr1	7400000	7405000	chr1:7470000-7475000	11.2218
chr1	7400000	7405000	chr1:7535000-7540000	47.9778
chr1	7400000	7405000	chr1:7545000-7550000	9.2506
chr1	7400000	7405000	chr1:7550000-7555000	11.7833
chr1	7400000	7405000	chr1:7590000-7595000	3.0865
chr1	7400000	7405000	chr1:7645000-7650000	17.047
chr1	7400000	7405000	chr1:7650000-7655000	2.44207
chr1	7405000	7410000	chr1:7535000-7540000	2.8966
chr1	7435000	7440000	chr1:7400000-7405000	2.92258
chr1	7450000	7455000	chr1:7400000-7405000	5.78702
chr1	7450000	7455000	chr1:7535000-7540000	3.35543
chr1	7470000	7475000	chr1:7400000-7405000	11.2218
chr1	7535000	7540000	chr1:7400000-7405000	47.9778
chr1	7535000	7540000	chr1:7405000-7410000	2.8966
chr1	7535000	7540000	chr1:7450000-7455000	3.35543
chr1	7545000	7550000	chr1:7400000-7405000	9.2506
chr1	7550000	7555000	chr1:7400000-7405000	11.7833
chr1	7590000	7595000	chr1:7400000-7405000	3.0865
chr1	7645000	7650000	chr1:7400000-7405000	17.047
chr1	7650000	7655000	chr1:7400000-7405000	2.44207
chr1	7670000	7675000	chr1:7745000-7750000	2.37872
chr1	7670000	7675000	chr1:7750000-7755000	11.3202
chr1	7745000	7750000	chr1:7670000-7675000	2.37872
chr1	7750000	7755000	chr1:7670000-7675000	11.3202
chr1	7770000	7775000	chr1:7950000-7955000	2.68661
chr1	7950000	7955000	chr1:7770000-7775000	2.68661
chr1	7960000	7965000	chr1:8280000-8285000	2.28823
chr1	7985000	7990000	chr1:8165000-8170000	3.04489
chr1	7985000	7990000	chr1:8180000-8185000	5.83149
chr1	7990000	7995000	chr1:8010000-8015000	4.62521
chr1	7990000	7995000	chr1:8165000-8170000	10.917
chr1	7990000	7995000	chr1:8170000-8175000	3.49147
chr1	7990000	7995000	chr1:8180000-8185000	14.3786
chr1	7990000	7995000	chr1:8195000-8200000	2.28964
chr1	7990000	7995000	chr1:8285000-8290000	4.0529
chr1	7990000	7995000	chr1:8300000-8305000	2.68947
chr1	7990000	7995000	chr1:8305000-8310000	3.06493
chr1	7990000	7995000	chr1:8310000-8315000	11.9818
chr1	7990000	7995000	chr1:8315000-8320000	6.58905
chr1	7990000	7995000	chr1:8425000-8430000	5.50313
chr1	7995000	8000000	chr1:8180000-8185000	2.63909
chr1	7995000	8000000	chr1:8310000-8315000	4.47021
chr1	8010000	8015000	chr1:7990000-7995000	4.62521
chr1	8010000	8015000	chr1:8165000-8170000	5.02933
chr1	8010000	8015000	chr1:8280000-8285000	3.95021
chr1	8010000	8015000	chr1:8310000-8315000	3.52849
chr1	8015000	8020000	chr1:8095000-8100000	3.56271
chr1	8015000	8020000	chr1:8165000-8170000	6.67462
chr1	8015000	8020000	chr1:8180000-8185000	10.0635
chr1	8015000	8020000	chr1:8265000-8270000	2.12336
chr1	8015000	8020000	chr1:8280000-8285000	8.34377
chr1	8015000	8020000	chr1:8310000-8315000	20.8139
chr1	8015000	8020000	chr1:8315000-8320000	10.8062
chr1	8015000	8020000	chr1:8345000-8350000	2.64976
chr1	8020000	8025000	chr1:8095000-8100000	3.80057
chr1	8020000	8025000	chr1:8165000-8170000	10.9302
chr1	8020000	8025000	chr1:8170000-8175000	2.8406
chr1	8020000	8025000	chr1:8180000-8185000	17.4227
chr1	8020000	8025000	chr1:8280000-8285000	9.98508
chr1	8020000	8025000	chr1:8310000-8315000	5.50063
chr1	8020000	8025000	chr1:8315000-8320000	3.3625
chr1	8020000	8025000	chr1:8395000-8400000	2.04501
chr1	8035000	8040000	chr1:8095000-8100000	9.63216
chr1	8035000	8040000	chr1:8165000-8170000	19.5364
chr1	8035000	8040000	chr1:8180000-8185000	17.9795
chr1	8035000	8040000	chr1:8280000-8285000	3.91212
chr1	8035000	8040000	chr1:8310000-8315000	2.77881
chr1	8060000	8065000	chr1:8095000-8100000	4.68194
chr1	8060000	8065000	chr1:8165000-8170000	2.90198
chr1	8060000	8065000	chr1:8180000-8185000	5.02299
chr1	8065000	8070000	chr1:8095000-8100000	2.37576
chr1	8065000	8070000	chr1:8180000-8185000	2.87395
chr1	8070000	8075000	chr1:8095000-8100000	2.03068
chr1	8080000	8085000	chr1:8165000-8170000	4.79405
chr1	8080000	8085000	chr1:8180000-8185000	2.55207
chr1	8090000	8095000	chr1:8165000-8170000	6.70506
chr1	8090000	8095000	chr1:8180000-8185000	3.49163
chr1	8095000	8100000	chr1:6820000-6825000	3.22398
chr1	8095000	8100000	chr1:8015000-8020000	3.56271
chr1	8095000	8100000	chr1:8020000-8025000	3.80057
chr1	8095000	8100000	chr1:8035000-8040000	9.63216
chr1	8095000	8100000	chr1:8060000-8065000	4.68194
chr1	8095000	8100000	chr1:8065000-8070000	2.37576
chr1	8095000	8100000	chr1:8070000-8075000	2.03068
chr1	8095000	8100000	chr1:8145000-8150000	3.17272
chr1	8095000	8100000	chr1:8155000-8160000	2.87935
chr1	8095000	8100000	chr1:8165000-8170000	166.439
chr1	8095000	8100000	chr1:8170000-8175000	31.7349
chr1	8095000	8100000	chr1:8180000-8185000	111.084
chr1	8095000	8100000	chr1:8220000-8225000	5.8419
chr1	8095000	8100000	chr1:8225000-8230000	15.0382
chr1	8095000	8100000	chr1:8265000-8270000	4.43591
chr1	8095000	8100000	chr1:8280000-8285000	40.6999
chr1	8095000	8100000	chr1:8285000-8290000	23.1809
chr1	8095000	8100000	chr1:8295000-8300000	3.26125
chr1	8095000	8100000	chr1:8305000-8310000	4.06477
chr1	8095000	8100000	chr1:8310000-8315000	17.89
chr1	8095000	8100000	chr1:8315000-8320000	5.74646
chr1	8095000	8100000	chr1:8345000-8350000	2.82718
chr1	8095000	8100000	chr1:8395000-8400000	2.11946
chr1	8095000	8100000	chr1:8425000-8430000	2.58085
chr1	8095000	8100000	chr1:8625000-8630000	3.34362
chr1	8095000	8100000	chr1:8660000-8665000	4.18474
chr1	8095000	8100000	chr1:8700000-8705000	2.41842
chr1	8095000	8100000	chr1:8875000-8880000	3.94059
chr1	8105000	8110000	chr1:8165000-8170000	7.70716
chr1	8105000	8110000	chr1:8180000-8185000	2.64262
chr1	8145000	8150000	chr1:8095000-8100000	3.17272
chr1	8155000	8160000	chr1:8095000-8100000	2.87935
chr1	8165000	8170000	chr1:7985000-7990000	3.04489
chr1	8165000	8170000	chr1:7990000-7995000	10.917
chr1	8165000	8170000	chr1:8010000-8015000	5.02933
chr1	8165000	8170000	chr1:8015000-8020000	6.67462
chr1	8165000	8170000	chr1:8020000-8025000	10.9302
chr1	8165000	8170000	chr1:8035000-8040000	19.5364
chr1	8165000	8170000	chr1:8060000-8065000	2.90198
chr1	8165000	8170000	chr1:8080000-8085000	4.79405
chr1	8165000	8170000	chr1:8090000-8095000	6.70506
chr1	8165000	8170000	chr1:8095000-8100000	166.439
chr1	8165000	8170000	chr1:8105000-8110000	7.70716
chr1	8165000	8170000	chr1:8280000-8285000	11.8741
chr1	8165000	8170000	chr1:8285000-8290000	7.3212
chr1	8165000	8170000	chr1:8310000-8315000	13.9081
chr1	8165000	8170000	chr1:8315000-8320000	2.75629
chr1	8165000	8170000	chr1:8345000-8350000	9.29858
chr1	8170000	8175000	chr1:7990000-7995000	3.49147
chr1	8170000	8175000	chr1:8020000-8025000	2.8406
chr1	8170000	8175000	chr1:8095000-8100000	31.7349
chr1	8170000	8175000	chr1:8280000-8285000	3.00522
chr1	8180000	8185000	chr1:6820000-6825000	3.51134
chr1	8180000	8185000	chr1:7985000-7990000	5.83149
chr1	8180000	8185000	chr1:7990000-7995000	14.3786
chr1	8180000	8185000	chr1:7995000-8000000	2.63909
chr1	8180000	8185000	chr1:8015000-8020000	10.0635
chr1	8180000	8185000	chr1:8020000-8025000	17.4227
chr1	8180000	8185000	chr1:8035000-8040000	17.9795
chr1	8180000	8185000	chr1:8060000-8065000	5.02299
chr1	8180000	8185000	chr1:8065000-8070000	2.87395
chr1	8180000	8185000	chr1:8080000-8085000	2.55207
chr1	8180000	8185000	chr1:8090000-8095000	3.49163
chr1	8180000	8185000	chr1:8095000-8100000	111.084
chr1	8180000	8185000	chr1:8105000-8110000	2.64262
chr1	8180000	8185000	chr1:8280000-8285000	14.6341
chr1	8180000	8185000	chr1:8285000-8290000	4.22811
chr1	8180000	8185000	chr1:8295000-8300000	2.51686
chr1	8180000	8185000	chr1:8310000-8315000	19.7681
chr1	8180000	8185000	chr1:8660000-8665000	3.68582
chr1	8195000	8200000	chr1:7990000-7995000	2.28964
chr1	8195000	8200000	chr1:8280000-8285000	2.48221
chr1	8220000	8225000	chr1:8095000-8100000	5.8419
chr1	8225000	8230000	chr1:8095000-8100000	15.0382
chr1	8265000	8270000	chr1:8015000-8020000	2.12336
chr1	8265000	8270000	chr1:8095000-8100000	4.43591
chr1	8280000	8285000	chr1:7960000-7965000	2.28823
chr1	8280000	8285000	chr1:8010000-8015000	3.95021
chr1	8280000	8285000	chr1:8015000-8020000	8.34377
chr1	8280000	8285000	chr1:8020000-8025000	9.98508
chr1	8280000	8285000	chr1:8035000-8040000	3.91212
chr1	8280000	8285000	chr1:8095000-8100000	40.6999
chr1	8280000	8285000	chr1:8165000-8170000	11.8741
chr1	8280000	8285000	chr1:8170000-8175000	3.00522
chr1	8280000	8285000	chr1:8180000-8185000	14.6341
chr1	8280000	8285000	chr1:8195000-8200000	2.48221
chr1	8285000	8290000	chr1:7990000-7995000	4.0529
chr1	8285000	8290000	chr1:8095000-8100000	23.1809
chr1	8285000	8290000	chr1:8165000-8170000	7.3212
chr1	8285000	8290000	chr1:8180000-8185000	4.22811
chr1	8295000	8300000	chr1:8095000-8100000	3.26125
chr1	8295000	8300000	chr1:8180000-8185000	2.51686
chr1	8300000	8305000	chr1:7990000-7995000	2.68947
chr1	8305000	8310000	chr1:7990000-7995000	3.06493
chr1	8305000	8310000	chr1:8095000-8100000	4.06477
chr1	8310000	8315000	chr1:7990000-7995000	11.9818
chr1	8310000	8315000	chr1:7995000-8000000	4.47021
chr1	8310000	8315000	chr1:8010000-8015000	3.52849
chr1	8310000	8315000	chr1:8015000-8020000	20.8139
chr1	8310000	8315000	chr1:8020000-8025000	5.50063
chr1	8310000	8315000	chr1:8035000-8040000	2.77881
chr1	8310000	8315000	chr1:8095000-8100000	17.89
chr1	8310000	8315000	chr1:8165000-8170000	13.9081
chr1	8310000	8315000	chr1:8180000-8185000	19.7681
chr1	8315000	8320000	chr1:7990000-7995000	6.58905
chr1	8315000	8320000	chr1:8015000-8020000	10.8062
chr1	8315000	8320000	chr1:8020000-8025000	3.3625
chr1	8315000	8320000	chr1:8095000-8100000	5.74646
chr1	8315000	8320000	chr1:8165000-8170000	2.75629
chr1	8345000	8350000	chr1:8015000-8020000	2.64976
chr1	8345000	8350000	chr1:8095000-8100000	2.82718
chr1	8345000	8350000	chr1:8165000-8170000	9.29858
chr1	8395000	8400000	chr1:8020000-8025000	2.04501
chr1	8395000	8400000	chr1:8095000-8100000	2.11946
chr1	8395000	8400000	chr1:8420000-8425000	6.99405
chr1	8395000	8400000	chr1:8425000-8430000	8.38828
chr1	8395000	8400000	chr1:8470000-8475000	7.20987
chr1	8395000	8400000	chr1:8525000-8530000	3.27354
chr1	8395000	8400000	chr1:8540000-8545000	3.22302
chr1	8395000	8400000	chr1:8660000-8665000	9.16009
chr1	8395000	8400000	chr1:8700000-8705000	4.17685
chr1	8395000	8400000	chr1:8710000-8715000	3.17732
chr1	8395000	8400000	chr1:8725000-8730000	3.65711
chr1	8395000	8400000	chr1:8875000-8880000	12.7789
chr1	8420000	8425000	chr1:8395000-8400000	6.99405
chr1	8420000	8425000	chr1:8470000-8475000	2.65153
chr1	8420000	8425000	chr1:8475000-8480000	2.70134
chr1	8420000	8425000	chr1:8660000-8665000	6.44361
chr1	8420000	8425000	chr1:8875000-8880000	5.55633
chr1	8425000	8430000	chr1:7990000-7995000	5.50313
chr1	8425000	8430000	chr1:8095000-8100000	2.58085
chr1	8425000	8430000	chr1:8395000-8400000	8.38828
chr1	8425000	8430000	chr1:8470000-8475000	12.8859
chr1	8425000	8430000	chr1:8475000-8480000	11.5389
chr1	8425000	8430000	chr1:8660000-8665000	7.42563
chr1	8425000	8430000	chr1:8875000-8880000	2.49699
chr1	8435000	8440000	chr1:8470000-8475000	7.07834
chr1	8470000	8475000	chr1:8395000-8400000	7.20987
chr1	8470000	8475000	chr1:8420000-8425000	2.65153
chr1	8470000	8475000	chr1:8425000-8430000	12.8859
chr1	8470000	8475000	chr1:8435000-8440000	7.07834
chr1	8470000	8475000	chr1:8660000-8665000	3.30177
chr1	8470000	8475000	chr1:8725000-8730000	10.2064
chr1	8470000	8475000	chr1:8875000-8880000	5.67722
chr1	8475000	8480000	chr1:8420000-8425000	2.70134
chr1	8475000	8480000	chr1:8425000-8430000	11.5389
chr1	8520000	8525000	chr1:8875000-8880000	2.32929
chr1	8525000	8530000	chr1:8395000-8400000	3.27354
chr1	8530000	8535000	chr1:8875000-8880000	2.51476
chr1	8540000	8545000	chr1:8395000-8400000	3.22302
chr1	8540000	8545000	chr1:8700000-8705000	2.09397
chr1	8540000	8545000	chr1:8710000-8715000	2.17637
chr1	8540000	8545000	chr1:8725000-8730000	5.26195
chr1	8540000	8545000	chr1:8815000-8820000	7.69065
chr1	8540000	8545000	chr1:8875000-8880000	4.94735
chr1	8560000	8565000	chr1:8625000-8630000	2.58066
chr1	8560000	8565000	chr1:8640000-8645000	12.776
chr1	8560000	8565000	chr1:8650000-8655000	3.0512
chr1	8560000	8565000	chr1:8660000-8665000	13.6139
chr1	8560000	8565000	chr1:8670000-8675000	11.2974
chr1	8560000	8565000	chr1:8695000-8700000	4.31676
chr1	8560000	8565000	chr1:8700000-8705000	6.68717
chr1	8560000	8565000	chr1:8710000-8715000	18.3062
chr1	8560000	8565000	chr1:8725000-8730000	41.9252
chr1	8560000	8565000	chr1:8760000-8765000	2.21551
chr1	8600000	8605000	chr1:8625000-8630000	2.44923
chr1	8600000	8605000	chr1:8640000-8645000	2.14246
chr1	8600000	8605000	chr1:8670000-8675000	2.89664
chr1	8600000	8605000	chr1:8725000-8730000	2.5332
chr1	8605000	8610000	chr1:8625000-8630000	2.01865
chr1	8605000	8610000	chr1:8640000-8645000	7.34609
chr1	8625000	8630000	chr1:8095000-8100000	3.34362
chr1	8625000	8630000	chr1:8560000-8565000	2.58066
chr1	8625000	8630000	chr1:8600000-8605000	2.44923
chr1	8625000	8630000	chr1:8605000-8610000	2.01865
chr1	8625000	8630000	chr1:8700000-8705000	2.60681
chr1	8640000	8645000	chr1:8560000-8565000	12.776
chr1	8640000	8645000	chr1:8600000-8605000	2.14246
chr1	8640000	8645000	chr1:8605000-8610000	7.34609
chr1	8640000	8645000	chr1:8660000-8665000	11.9023
chr1	8640000	8645000	chr1:8700000-8705000	4.92467
chr1	8650000	8655000	chr1:8560000-8565000	3.0512
chr1	8660000	8665000	chr1:8095000-8100000	4.18474
chr1	8660000	8665000	chr1:8180000-8185000	3.68582
chr1	8660000	8665000	chr1:8395000-8400000	9.16009
chr1	8660000	8665000	chr1:8420000-8425000	6.44361
chr1	8660000	8665000	chr1:8425000-8430000	7.42563
chr1	8660000	8665000	chr1:8470000-8475000	3.30177
chr1	8660000	8665000	chr1:8560000-8565000	13.6139
chr1	8660000	8665000	chr1:8640000-8645000	11.9023
chr1	8660000	8665000	chr1:8875000-8880000	2.31827
chr1	8670000	8675000	chr1:8560000-8565000	11.2974
chr1	8670000	8675000	chr1:8600000-8605000	2.89664
chr1	8680000	8685000	chr1:8700000-8705000	2.9437
chr1	8695000	8700000	chr1:8560000-8565000	4.31676
chr1	8700000	8705000	chr1:8095000-8100000	2.41842
chr1	8700000	8705000	chr1:8395000-8400000	4.17685
chr1	8700000	8705000	chr1:8540000-8545000	2.09397
chr1	8700000	8705000	chr1:8560000-8565000	6.68717
chr1	8700000	8705000	chr1:8625000-8630000	2.60681
chr1	8700000	8705000	chr1:8640000-8645000	4.92467
chr1	8700000	8705000	chr1:8680000-8685000	2.9437
chr1	8710000	8715000	chr1:8395000-8400000	3.17732
chr1	8710000	8715000	chr1:8540000-8545000	2.17637
chr1	8710000	8715000	chr1:8560000-8565000	18.3062
chr1	8725000	8730000	chr1:8395000-8400000	3.65711
chr1	8725000	8730000	chr1:8470000-8475000	10.2064
chr1	8725000	8730000	chr1:8540000-8545000	5.26195
chr1	8725000	8730000	chr1:8560000-8565000	41.9252
chr1	8725000	8730000	chr1:8600000-8605000	2.5332
chr1	8760000	8765000	chr1:8560000-8565000	2.21551
chr1	8760000	8765000	chr1:8815000-8820000	4.44742
chr1	8815000	8820000	chr1:8540000-8545000	7.69065
chr1	8815000	8820000	chr1:8760000-8765000	4.44742
chr1	8875000	8880000	chr1:8095000-8100000	3.94059
chr1	8875000	8880000	chr1:8395000-8400000	12.7789
chr1	8875000	8880000	chr1:8420000-8425000	5.55633
chr1	8875000	8880000	chr1:8425000-8430000	2.49699
chr1	8875000	8880000	chr1:8470000-8475000	5.67722
chr1	8875000	8880000	chr1:8520000-8525000	2.32929
chr1	8875000	8880000	chr1:8530000-8535000	2.51476
chr1	8875000	8880000	chr1:8540000-8545000	4.94735
chr1	8875000	8880000	chr1:8660000-8665000	2.31827
chr1	8875000	8880000	chr1:8900000-8905000	2.31819
chr1	8875000	8880000	chr1:9035000-9040000	2.43583
chr1	8875000	8880000	chr1:9065000-9070000	4.69363
chr1	8875000	8880000	chr1:9075000-9080000	15.8394
chr1	8875000	8880000	chr1:9080000-9085000	13.5275
chr1	8875000	8880000	chr1:9125000-9130000	3.67609
chr1	8875000	8880000	chr1:9160000-9165000	4.74244
chr1	8875000	8880000	chr1:9180000-9185000	14.6577
chr1	8875000	8880000	chr1:9195000-9200000	8.18209
chr1	8875000	8880000	chr1:9215000-9220000	2.81967
chr1	8875000	8880000	chr1:9230000-9235000	5.99985
chr1	8875000	8880000	chr1:9235000-9240000	3.2832
chr1	8875000	8880000	chr1:9425000-9430000	2.4427
chr1	8875000	8880000	chr1:9530000-9535000	2.99933
chr1	8875000	8880000	chr1:9650000-9655000	2.54174
chr1	8900000	8905000	chr1:8875000-8880000	2.31819
chr1	9010000	9015000	chr1:9065000-9070000	2.34846
chr1	9010000	9015000	chr1:9080000-9085000	9.31408
chr1	9010000	9015000	chr1:9095000-9100000	2.3983
chr1	9015000	9020000	chr1:9075000-9080000	2.68264
chr1	9035000	9040000	chr1:8875000-8880000	2.43583
chr1	9035000	9040000	chr1:9100000-9105000	3.5369
chr1	9065000	9070000	chr1:8875000-8880000	4.69363
chr1	9065000	9070000	chr1:9010000-9015000	2.34846
chr1	9065000	9070000	chr1:9095000-9100000	3.35655
chr1	9075000	9080000	chr1:8875000-8880000	15.8394
chr1	9075000	9080000	chr1:9015000-9020000	2.68264
chr1	9080000	9085000	chr1:8875000-8880000	13.5275
chr1	9080000	9085000	chr1:9010000-9015000	9.31408
chr1	9095000	9100000	chr1:9010000-9015000	2.3983
chr1	9095000	9100000	chr1:9065000-9070000	3.35655
chr1	9100000	9105000	chr1:9035000-9040000	3.5369
chr1	9105000	9110000	chr1:9195000-9200000	10.6677
chr1	9115000	9120000	chr1:9180000-9185000	6.36577
chr1	9115000	9120000	chr1:9195000-9200000	7.07109
chr1	9115000	9120000	chr1:9230000-9235000	3.49236
chr1	9120000	9125000	chr1:9195000-9200000	8.426
chr1	9120000	9125000	chr1:9235000-9240000	3.0782
chr1	9125000	9130000	chr1:8875000-8880000	3.67609
chr1	9125000	9130000	chr1:9160000-9165000	8.09367
chr1	9125000	9130000	chr1:9180000-9185000	4.51629
chr1	9125000	9130000	chr1:9195000-9200000	2.80146
chr1	9130000	9135000	chr1:9160000-9165000	4.20371
chr1	9130000	9135000	chr1:9180000-9185000	2.75318
chr1	9135000	9140000	chr1:9160000-9165000	5.8128
chr1	9135000	9140000	chr1:9180000-9185000	4.48131
chr1	9135000	9140000	chr1:9195000-9200000	11.2927
chr1	9140000	9145000	chr1:9195000-9200000	4.64945
chr1	9145000	9150000	chr1:9180000-9185000	3.48358
chr1	9145000	9150000	chr1:9195000-9200000	3.37251
chr1	9160000	9165000	chr1:8875000-8880000	4.74244
chr1	9160000	9165000	chr1:9125000-9130000	8.09367
chr1	9160000	9165000	chr1:9130000-9135000	4.20371
chr1	9160000	9165000	chr1:9135000-9140000	5.8128
chr1	9160000	9165000	chr1:9195000-9200000	5.79592
chr1	9180000	9185000	chr1:8875000-8880000	14.6577
chr1	9180000	9185000	chr1:9115000-9120000	6.36577
chr1	9180000	9185000	chr1:9125000-9130000	4.51629
chr1	9180000	9185000	chr1:9130000-9135000	2.75318
chr1	9180000	9185000	chr1:9135000-9140000	4.48131
chr1	9180000	9185000	chr1:9145000-9150000	3.48358
chr1	9195000	9200000	chr1:8875000-8880000	8.18209
chr1	9195000	9200000	chr1:9105000-9110000	10.6677
chr1	9195000	9200000	chr1:9115000-9120000	7.07109
chr1	9195000	9200000	chr1:9120000-9125000	8.426
chr1	9195000	9200000	chr1:9125000-9130000	2.80146
chr1	9195000	9200000	chr1:9135000-9140000	11.2927
chr1	9195000	9200000	chr1:9140000-9145000	4.64945
chr1	9195000	9200000	chr1:9145000-9150000	3.37251
chr1	9195000	9200000	chr1:9160000-9165000	5.79592
chr1	9205000	9210000	chr1:9230000-9235000	2.75969
chr1	9215000	9220000	chr1:8875000-8880000	2.81967
chr1	9230000	9235000	chr1:8875000-8880000	5.99985
chr1	9230000	9235000	chr1:9115000-9120000	3.49236
chr1	9230000	9235000	chr1:9205000-9210000	2.75969
chr1	9235000	9240000	chr1:8875000-8880000	3.2832
chr1	9235000	9240000	chr1:9120000-9125000	3.0782
chr1	9285000	9290000	chr1:9490000-9495000	2.23596
chr1	9425000	9430000	chr1:8875000-8880000	2.4427
chr1	9490000	9495000	chr1:9285000-9290000	2.23596
chr1	9500000	9505000	chr1:9535000-9540000	2.13779
chr1	9530000	9535000	chr1:8875000-8880000	2.99933
chr1	9535000	9540000	chr1:9500000-9505000	2.13779
chr1	9585000	9590000	chr1:9860000-9865000	7.63873
chr1	9625000	9630000	chr1:10170000-10175000	5.66036
chr1	9625000	9630000	chr1:9650000-9655000	57.83
chr1	9625000	9630000	chr1:9655000-9660000	62.2941
chr1	9625000	9630000	chr1:9670000-9675000	12.0441
chr1	9625000	9630000	chr1:9680000-9685000	7.24111
chr1	9625000	9630000	chr1:9685000-9690000	30.4477
chr1	9625000	9630000	chr1:9700000-9705000	4.27734
chr1	9625000	9630000	chr1:9705000-9710000	12.4451
chr1	9625000	9630000	chr1:9710000-9715000	10.8062
chr1	9625000	9630000	chr1:9715000-9720000	7.67508
chr1	9625000	9630000	chr1:9725000-9730000	12.5851
chr1	9625000	9630000	chr1:9780000-9785000	2.68172
chr1	9625000	9630000	chr1:9785000-9790000	5.50363
chr1	9625000	9630000	chr1:9820000-9825000	3.12269
chr1	9625000	9630000	chr1:9825000-9830000	2.71949
chr1	9625000	9630000	chr1:9860000-9865000	10.3584
chr1	9625000	9630000	chr1:9865000-9870000	13.9278
chr1	9625000	9630000	chr1:9870000-9875000	4.86286
chr1	9625000	9630000	chr1:9940000-9945000	4.23739
chr1	9630000	9635000	chr1:9650000-9655000	50.0006
chr1	9630000	9635000	chr1:9655000-9660000	9.06791
chr1	9630000	9635000	chr1:9685000-9690000	7.06889
chr1	9630000	9635000	chr1:9860000-9865000	2.59813
chr1	9630000	9635000	chr1:9865000-9870000	2.06489
chr1	9650000	9655000	chr1:10510000-10515000	2.35616
chr1	9650000	9655000	chr1:8875000-8880000	2.54174
chr1	9650000	9655000	chr1:9625000-9630000	57.83
chr1	9650000	9655000	chr1:9630000-9635000	50.0006
chr1	9650000	9655000	chr1:9680000-9685000	2.21164
chr1	9650000	9655000	chr1:9685000-9690000	7.30605
chr1	9650000	9655000	chr1:9725000-9730000	2.62615
chr1	9655000	9660000	chr1:9625000-9630000	62.2941
chr1	9655000	9660000	chr1:9630000-9635000	9.06791
chr1	9655000	9660000	chr1:9680000-9685000	2.69239
chr1	9655000	9660000	chr1:9685000-9690000	17.6552
chr1	9655000	9660000	chr1:9940000-9945000	2.53433
chr1	9670000	9675000	chr1:9625000-9630000	12.0441
chr1	9680000	9685000	chr1:9625000-9630000	7.24111
chr1	9680000	9685000	chr1:9650000-9655000	2.21164
chr1	9680000	9685000	chr1:9655000-9660000	2.69239
chr1	9685000	9690000	chr1:9625000-9630000	30.4477
chr1	9685000	9690000	chr1:9630000-9635000	7.06889
chr1	9685000	9690000	chr1:9650000-9655000	7.30605
chr1	9685000	9690000	chr1:9655000-9660000	17.6552
chr1	9700000	9705000	chr1:9625000-9630000	4.27734
chr1	9705000	9710000	chr1:9625000-9630000	12.4451
chr1	9710000	9715000	chr1:9625000-9630000	10.8062
chr1	9715000	9720000	chr1:9625000-9630000	7.67508
chr1	9725000	9730000	chr1:9625000-9630000	12.5851
chr1	9725000	9730000	chr1:9650000-9655000	2.62615
chr1	9780000	9785000	chr1:9625000-9630000	2.68172
chr1	9780000	9785000	chr1:9860000-9865000	20.0616
chr1	9780000	9785000	chr1:9865000-9870000	11.7776
chr1	9780000	9785000	chr1:9870000-9875000	2.10474
chr1	9785000	9790000	chr1:10170000-10175000	5.67561
chr1	9785000	9790000	chr1:9625000-9630000	5.50363
chr1	9785000	9790000	chr1:9805000-9810000	4.9523
chr1	9785000	9790000	chr1:9810000-9815000	4.7321
chr1	9785000	9790000	chr1:9820000-9825000	11.927
chr1	9785000	9790000	chr1:9825000-9830000	4.10914
chr1	9785000	9790000	chr1:9860000-9865000	41.1368
chr1	9785000	9790000	chr1:9865000-9870000	37.4717
chr1	9785000	9790000	chr1:9870000-9875000	14.0335
chr1	9785000	9790000	chr1:9875000-9880000	3.60483
chr1	9785000	9790000	chr1:9940000-9945000	5.4656
chr1	9805000	9810000	chr1:9785000-9790000	4.9523
chr1	9810000	9815000	chr1:9785000-9790000	4.7321
chr1	9820000	9825000	chr1:9625000-9630000	3.12269
chr1	9820000	9825000	chr1:9785000-9790000	11.927
chr1	9825000	9830000	chr1:9625000-9630000	2.71949
chr1	9825000	9830000	chr1:9785000-9790000	4.10914
chr1	9825000	9830000	chr1:9860000-9865000	2.28753
chr1	9860000	9865000	chr1:9585000-9590000	7.63873
chr1	9860000	9865000	chr1:9625000-9630000	10.3584
chr1	9860000	9865000	chr1:9630000-9635000	2.59813
chr1	9860000	9865000	chr1:9780000-9785000	20.0616
chr1	9860000	9865000	chr1:9785000-9790000	41.1368
chr1	9860000	9865000	chr1:9825000-9830000	2.28753
chr1	9865000	9870000	chr1:10030000-10035000	4.12583
chr1	9865000	9870000	chr1:9625000-9630000	13.9278
chr1	9865000	9870000	chr1:9630000-9635000	2.06489
chr1	9865000	9870000	chr1:9780000-9785000	11.7776
chr1	9865000	9870000	chr1:9785000-9790000	37.4717
chr1	9870000	9875000	chr1:9625000-9630000	4.86286
chr1	9870000	9875000	chr1:9780000-9785000	2.10474
chr1	9870000	9875000	chr1:9785000-9790000	14.0335
chr1	9870000	9875000	chr1:9940000-9945000	4.35577
chr1	9875000	9880000	chr1:10030000-10035000	2.9924
chr1	9875000	9880000	chr1:9785000-9790000	3.60483
chr1	9875000	9880000	chr1:9940000-9945000	3.44279
chr1	9925000	9930000	chr1:10030000-10035000	2.31372
chr1	9935000	9940000	chr1:10030000-10035000	3.19062
chr1	9940000	9945000	chr1:10030000-10035000	16.7617
chr1	9940000	9945000	chr1:10170000-10175000	4.02845
chr1	9940000	9945000	chr1:10395000-10400000	2.59969
chr1	9940000	9945000	chr1:10495000-10500000	3.76739
chr1	9940000	9945000	chr1:9625000-9630000	4.23739
chr1	9940000	9945000	chr1:9655000-9660000	2.53433
chr1	9940000	9945000	chr1:9785000-9790000	5.4656
chr1	9940000	9945000	chr1:9870000-9875000	4.35577
chr1	9940000	9945000	chr1:9875000-9880000	3.44279
chr1	9945000	9950000	chr1:10030000-10035000	2.20926
chr1	9950000	9955000	chr1:10030000-10035000	16.5468
chr1	9950000	9955000	chr1:10170000-10175000	5.33726
chr1	9950000	9955000	chr1:10430000-10435000	3.78632
chr1	10030000	10035000	chr1:10165000-10170000	2.19086
chr1	10030000	10035000	chr1:10170000-10175000	2.57944
chr1	10030000	10035000	chr1:10430000-10435000	4.45748
chr1	10030000	10035000	chr1:9865000-9870000	4.12583
chr1	10030000	10035000	chr1:9875000-9880000	2.9924
chr1	10030000	10035000	chr1:9925000-9930000	2.31372
chr1	10030000	10035000	chr1:9935000-9940000	3.19062
chr1	10030000	10035000	chr1:9940000-9945000	16.7617
chr1	10030000	10035000	chr1:9945000-9950000	2.20926
chr1	10030000	10035000	chr1:9950000-9955000	16.5468
chr1	10110000	10115000	chr1:10165000-10170000	2.33597
chr1	10165000	10170000	chr1:10030000-10035000	2.19086
chr1	10165000	10170000	chr1:10110000-10115000	2.33597
chr1	10170000	10175000	chr1:10030000-10035000	2.57944
chr1	10170000	10175000	chr1:10210000-10215000	4.19767
chr1	10170000	10175000	chr1:10280000-10285000	4.6537
chr1	10170000	10175000	chr1:10300000-10305000	2.30084
chr1	10170000	10175000	chr1:10395000-10400000	6.782
chr1	10170000	10175000	chr1:10400000-10405000	5.02502
chr1	10170000	10175000	chr1:10470000-10475000	5.33408
chr1	10170000	10175000	chr1:9625000-9630000	5.66036
chr1	10170000	10175000	chr1:9785000-9790000	5.67561
chr1	10170000	10175000	chr1:9940000-9945000	4.02845
chr1	10170000	10175000	chr1:9950000-9955000	5.33726
chr1	10210000	10215000	chr1:10170000-10175000	4.19767
chr1	10210000	10215000	chr1:10250000-10255000	5.14771
chr1	10210000	10215000	chr1:10280000-10285000	6.97374
chr1	10215000	10220000	chr1:10280000-10285000	5.48088
chr1	10250000	10255000	chr1:10210000-10215000	5.14771
chr1	10280000	10285000	chr1:10170000-10175000	4.6537
chr1	10280000	10285000	chr1:10210000-10215000	6.97374
chr1	10280000	10285000	chr1:10215000-10220000	5.48088
chr1	10280000	10285000	chr1:10305000-10310000	4.94231
chr1	10300000	10305000	chr1:10170000-10175000	2.30084
chr1	10305000	10310000	chr1:10280000-10285000	4.94231
chr1	10395000	10400000	chr1:10170000-10175000	6.782
chr1	10395000	10400000	chr1:9940000-9945000	2.59969
chr1	10400000	10405000	chr1:10170000-10175000	5.02502
chr1	10425000	10430000	chr1:10490000-10495000	3.43024
chr1	10425000	10430000	chr1:10495000-10500000	8.93082
chr1	10430000	10435000	chr1:10030000-10035000	4.45748
chr1	10430000	10435000	chr1:10475000-10480000	2.86676
chr1	10430000	10435000	chr1:10490000-10495000	12.5183
chr1	10430000	10435000	chr1:10495000-10500000	7.66247
chr1	10430000	10435000	chr1:9950000-9955000	3.78632
chr1	10470000	10475000	chr1:10170000-10175000	5.33408
chr1	10470000	10475000	chr1:10985000-10990000	3.125
chr1	10470000	10475000	chr1:11010000-11015000	2.31924
chr1	10475000	10480000	chr1:10430000-10435000	2.86676
chr1	10475000	10480000	chr1:10985000-10990000	4.30112
chr1	10490000	10495000	chr1:10425000-10430000	3.43024
chr1	10490000	10495000	chr1:10430000-10435000	12.5183
chr1	10490000	10495000	chr1:10865000-10870000	3.9334
chr1	10490000	10495000	chr1:10940000-10945000	3.66746
chr1	10490000	10495000	chr1:10960000-10965000	2.17804
chr1	10490000	10495000	chr1:10985000-10990000	2.73318
chr1	10495000	10500000	chr1:10425000-10430000	8.93082
chr1	10495000	10500000	chr1:10430000-10435000	7.66247
chr1	10495000	10500000	chr1:10615000-10620000	2.52719
chr1	10495000	10500000	chr1:10690000-10695000	36.3582
chr1	10495000	10500000	chr1:10745000-10750000	2.15482
chr1	10495000	10500000	chr1:10860000-10865000	2.38008
chr1	10495000	10500000	chr1:10865000-10870000	27.821
chr1	10495000	10500000	chr1:10870000-10875000	7.67394
chr1	10495000	10500000	chr1:10890000-10895000	2.04893
chr1	10495000	10500000	chr1:10905000-10910000	6.6112
chr1	10495000	10500000	chr1:10930000-10935000	2.18969
chr1	10495000	10500000	chr1:10935000-10940000	17.7241
chr1	10495000	10500000	chr1:10940000-10945000	16.0689
chr1	10495000	10500000	chr1:10950000-10955000	2.31953
chr1	10495000	10500000	chr1:10955000-10960000	2.80383
chr1	10495000	10500000	chr1:10960000-10965000	19.3286
chr1	10495000	10500000	chr1:10965000-10970000	22.2484
chr1	10495000	10500000	chr1:10980000-10985000	4.40965
chr1	10495000	10500000	chr1:10985000-10990000	22.4541
chr1	10495000	10500000	chr1:11005000-11010000	4.28738
chr1	10495000	10500000	chr1:11010000-11015000	12.236
chr1	10495000	10500000	chr1:11020000-11025000	2.47512
chr1	10495000	10500000	chr1:11030000-11035000	4.83636
chr1	10495000	10500000	chr1:11060000-11065000	2.94315
chr1	10495000	10500000	chr1:9940000-9945000	3.76739
chr1	10505000	10510000	chr1:10630000-10635000	3.19499
chr1	10505000	10510000	chr1:10685000-10690000	2.03973
chr1	10505000	10510000	chr1:10690000-10695000	15.4877
chr1	10505000	10510000	chr1:10860000-10865000	2.94171
chr1	10505000	10510000	chr1:10865000-10870000	13.7946
chr1	10505000	10510000	chr1:10920000-10925000	2.2355
chr1	10505000	10510000	chr1:10930000-10935000	2.73648
chr1	10505000	10510000	chr1:10935000-10940000	7.03736
chr1	10505000	10510000	chr1:10940000-10945000	4.87153
chr1	10505000	10510000	chr1:10960000-10965000	12.3278
chr1	10505000	10510000	chr1:10965000-10970000	9.94258
chr1	10505000	10510000	chr1:10985000-10990000	16.8389
chr1	10505000	10510000	chr1:11005000-11010000	3.39701
chr1	10505000	10510000	chr1:11010000-11015000	3.62215
chr1	10510000	10515000	chr1:10580000-10585000	4.98965
chr1	10510000	10515000	chr1:10615000-10620000	2.55899
chr1	10510000	10515000	chr1:10630000-10635000	2.14834
chr1	10510000	10515000	chr1:10685000-10690000	4.77514
chr1	10510000	10515000	chr1:10690000-10695000	33.035
chr1	10510000	10515000	chr1:10695000-10700000	4.12769
chr1	10510000	10515000	chr1:10710000-10715000	2.94719
chr1	10510000	10515000	chr1:10850000-10855000	2.091
chr1	10510000	10515000	chr1:10860000-10865000	11.8268
chr1	10510000	10515000	chr1:10865000-10870000	40.4349
chr1	10510000	10515000	chr1:10870000-10875000	6.40298
chr1	10510000	10515000	chr1:10875000-10880000	3.47602
chr1	10510000	10515000	chr1:10880000-10885000	4.48677
chr1	10510000	10515000	chr1:10905000-10910000	7.45825
chr1	10510000	10515000	chr1:10910000-10915000	3.8932
chr1	10510000	10515000	chr1:10920000-10925000	7.20758
chr1	10510000	10515000	chr1:10925000-10930000	2.14024
chr1	10510000	10515000	chr1:10930000-10935000	11.4942
chr1	10510000	10515000	chr1:10935000-10940000	30.8396
chr1	10510000	10515000	chr1:10940000-10945000	28.0255
chr1	10510000	10515000	chr1:10950000-10955000	4.95702
chr1	10510000	10515000	chr1:10955000-10960000	5.73887
chr1	10510000	10515000	chr1:10960000-10965000	23.5384
chr1	10510000	10515000	chr1:10965000-10970000	42.4475
chr1	10510000	10515000	chr1:10975000-10980000	10.4916
chr1	10510000	10515000	chr1:10980000-10985000	5.84946
chr1	10510000	10515000	chr1:10985000-10990000	31.8245
chr1	10510000	10515000	chr1:10990000-10995000	4.57769
chr1	10510000	10515000	chr1:10995000-11000000	2.76905
chr1	10510000	10515000	chr1:11010000-11015000	11.2084
chr1	10510000	10515000	chr1:11050000-11055000	2.18593
chr1	10510000	10515000	chr1:11060000-11065000	11.4108
chr1	10510000	10515000	chr1:11095000-11100000	4.69636
chr1	10510000	10515000	chr1:9650000-9655000	2.35616
chr1	10515000	10520000	chr1:10690000-10695000	11.991
chr1	10515000	10520000	chr1:10865000-10870000	9.97175
chr1	10515000	10520000	chr1:10905000-10910000	5.25858
chr1	10515000	10520000	chr1:10935000-10940000	7.1655
chr1	10515000	10520000	chr1:10940000-10945000	9.86331
chr1	10515000	10520000	chr1:10960000-10965000	11.3672
chr1	10515000	10520000	chr1:10965000-10970000	9.08455
chr1	10515000	10520000	chr1:10985000-10990000	19.0219
chr1	10515000	10520000	chr1:11010000-11015000	2.61723
chr1	10520000	10525000	chr1:10985000-10990000	2.01564
chr1	10555000	10560000	chr1:10985000-10990000	2.99607
chr1	10580000	10585000	chr1:10510000-10515000	4.98965
chr1	10615000	10620000	chr1:10495000-10500000	2.52719
chr1	10615000	10620000	chr1:10510000-10515000	2.55899
chr1	10630000	10635000	chr1:10505000-10510000	3.19499
chr1	10630000	10635000	chr1:10510000-10515000	2.14834
chr1	10685000	10690000	chr1:10505000-10510000	2.03973
chr1	10685000	10690000	chr1:10510000-10515000	4.77514
chr1	10690000	10695000	chr1:10495000-10500000	36.3582
chr1	10690000	10695000	chr1:10505000-10510000	15.4877
chr1	10690000	10695000	chr1:10510000-10515000	33.035
chr1	10690000	10695000	chr1:10515000-10520000	11.991
chr1	10690000	10695000	chr1:10800000-10805000	2.22866
chr1	10690000	10695000	chr1:10865000-10870000	18.1992
chr1	10690000	10695000	chr1:10940000-10945000	2.86388
chr1	10690000	10695000	chr1:10960000-10965000	5.95275
chr1	10690000	10695000	chr1:10965000-10970000	3.52991
chr1	10690000	10695000	chr1:10985000-10990000	3.61958
chr1	10695000	10700000	chr1:10510000-10515000	4.12769
chr1	10710000	10715000	chr1:10510000-10515000	2.94719
chr1	10745000	10750000	chr1:10495000-10500000	2.15482
chr1	10800000	10805000	chr1:10690000-10695000	2.22866
chr1	10850000	10855000	chr1:10510000-10515000	2.091
chr1	10860000	10865000	chr1:10495000-10500000	2.38008
chr1	10860000	10865000	chr1:10505000-10510000	2.94171
chr1	10860000	10865000	chr1:10510000-10515000	11.8268
chr1	10865000	10870000	chr1:10490000-10495000	3.9334
chr1	10865000	10870000	chr1:10495000-10500000	27.821
chr1	10865000	10870000	chr1:10505000-10510000	13.7946
chr1	10865000	10870000	chr1:10510000-10515000	40.4349
chr1	10865000	10870000	chr1:10515000-10520000	9.97175
chr1	10865000	10870000	chr1:10690000-10695000	18.1992
chr1	10870000	10875000	chr1:10495000-10500000	7.67394
chr1	10870000	10875000	chr1:10510000-10515000	6.40298
chr1	10875000	10880000	chr1:10510000-10515000	3.47602
chr1	10880000	10885000	chr1:10510000-10515000	4.48677
chr1	10890000	10895000	chr1:10495000-10500000	2.04893
chr1	10905000	10910000	chr1:10495000-10500000	6.6112
chr1	10905000	10910000	chr1:10510000-10515000	7.45825
chr1	10905000	10910000	chr1:10515000-10520000	5.25858
chr1	10910000	10915000	chr1:10510000-10515000	3.8932
chr1	10920000	10925000	chr1:10505000-10510000	2.2355
chr1	10920000	10925000	chr1:10510000-10515000	7.20758
chr1	10925000	10930000	chr1:10510000-10515000	2.14024
chr1	10930000	10935000	chr1:10495000-10500000	2.18969
chr1	10930000	10935000	chr1:10505000-10510000	2.73648
chr1	10930000	10935000	chr1:10510000-10515000	11.4942
chr1	10935000	10940000	chr1:10495000-10500000	17.7241
chr1	10935000	10940000	chr1:10505000-10510000	7.03736
chr1	10935000	10940000	chr1:10510000-10515000	30.8396
chr1	10935000	10940000	chr1:10515000-10520000	7.1655
chr1	10940000	10945000	chr1:10490000-10495000	3.66746
chr1	10940000	10945000	chr1:10495000-10500000	16.0689
chr1	10940000	10945000	chr1:10505000-10510000	4.87153
chr1	10940000	10945000	chr1:10510000-10515000	28.0255
chr1	10940000	10945000	chr1:10515000-10520000	9.86331
chr1	10940000	10945000	chr1:10690000-10695000	2.86388
chr1	10950000	10955000	chr1:10495000-10500000	2.31953
chr1	10950000	10955000	chr1:10510000-10515000	4.95702
chr1	10955000	10960000	chr1:10495000-10500000	2.80383
chr1	10955000	10960000	chr1:10510000-10515000	5.73887
chr1	10960000	10965000	chr1:10490000-10495000	2.17804
chr1	10960000	10965000	chr1:10495000-10500000	19.3286
chr1	10960000	10965000	chr1:10505000-10510000	12.3278
chr1	10960000	10965000	chr1:10510000-10515000	23.5384
chr1	10960000	10965000	chr1:10515000-10520000	11.3672
chr1	10960000	10965000	chr1:10690000-10695000	5.95275
chr1	10960000	10965000	chr1:10985000-10990000	8.28767
chr1	10960000	10965000	chr1:11010000-11015000	2.81768
chr1	10965000	10970000	chr1:10495000-10500000	22.2484
chr1	10965000	10970000	chr1:10505000-10510000	9.94258
chr1	10965000	10970000	chr1:10510000-10515000	42.4475
chr1	10965000	10970000	chr1:10515000-10520000	9.08455
chr1	10965000	10970000	chr1:10690000-10695000	3.52991
chr1	10965000	10970000	chr1:10985000-10990000	31.8052
chr1	10965000	10970000	chr1:11000000-11005000	4.02979
chr1	10965000	10970000	chr1:11010000-11015000	4.74526
chr1	10975000	10980000	chr1:10510000-10515000	10.4916
chr1	10980000	10985000	chr1:10495000-10500000	4.40965
chr1	10980000	10985000	chr1:10510000-10515000	5.84946
chr1	10985000	10990000	chr1:10470000-10475000	3.125
chr1	10985000	10990000	chr1:10475000-10480000	4.30112
chr1	10985000	10990000	chr1:10490000-10495000	2.73318
chr1	10985000	10990000	chr1:10495000-10500000	22.4541
chr1	10985000	10990000	chr1:10505000-10510000	16.8389
chr1	10985000	10990000	chr1:10510000-10515000	31.8245
chr1	10985000	10990000	chr1:10515000-10520000	19.0219
chr1	10985000	10990000	chr1:10520000-10525000	2.01564
chr1	10985000	10990000	chr1:10555000-10560000	2.99607
chr1	10985000	10990000	chr1:10690000-10695000	3.61958
chr1	10985000	10990000	chr1:10960000-10965000	8.28767
chr1	10985000	10990000	chr1:10965000-10970000	31.8052
chr1	10985000	10990000	chr1:11005000-11010000	6.64579
chr1	10985000	10990000	chr1:11010000-11015000	10.7426
chr1	10985000	10990000	chr1:12155000-12160000	2.49445
chr1	10990000	10995000	chr1:10510000-10515000	4.57769
chr1	10995000	11000000	chr1:10510000-10515000	2.76905
chr1	11000000	11005000	chr1:10965000-10970000	4.02979
chr1	11005000	11010000	chr1:10495000-10500000	4.28738
chr1	11005000	11010000	chr1:10505000-10510000	3.39701
chr1	11005000	11010000	chr1:10985000-10990000	6.64579
chr1	11010000	11015000	chr1:10470000-10475000	2.31924
chr1	11010000	11015000	chr1:10495000-10500000	12.236
chr1	11010000	11015000	chr1:10505000-10510000	3.62215
chr1	11010000	11015000	chr1:10510000-10515000	11.2084
chr1	11010000	11015000	chr1:10515000-10520000	2.61723
chr1	11010000	11015000	chr1:10960000-10965000	2.81768
chr1	11010000	11015000	chr1:10965000-10970000	4.74526
chr1	11010000	11015000	chr1:10985000-10990000	10.7426
chr1	11020000	11025000	chr1:10495000-10500000	2.47512
chr1	11030000	11035000	chr1:10495000-10500000	4.83636
chr1	11050000	11055000	chr1:10510000-10515000	2.18593
chr1	11060000	11065000	chr1:10495000-10500000	2.94315
chr1	11060000	11065000	chr1:10510000-10515000	11.4108
chr1	11060000	11065000	chr1:11080000-11085000	2.11636
chr1	11060000	11065000	chr1:11275000-11280000	2.37876
chr1	11070000	11075000	chr1:11095000-11100000	2.27188
chr1	11080000	11085000	chr1:11060000-11065000	2.11636
chr1	11095000	11100000	chr1:10510000-10515000	4.69636
chr1	11095000	11100000	chr1:11070000-11075000	2.27188
chr1	11275000	11280000	chr1:11060000-11065000	2.37876
chr1	11655000	11660000	chr1:11715000-11720000	2.35403
chr1	11660000	11665000	chr1:11680000-11685000	2.70366
chr1	11660000	11665000	chr1:11715000-11720000	3.61885
chr1	11680000	11685000	chr1:11660000-11665000	2.70366
chr1	11715000	11720000	chr1:11655000-11660000	2.35403
chr1	11715000	11720000	chr1:11660000-11665000	3.61885
chr1	11805000	11810000	chr1:11905000-11910000	4.22358
chr1	11905000	11910000	chr1:11805000-11810000	4.22358
chr1	11905000	11910000	chr1:11980000-11985000	5.76427
chr1	11905000	11910000	chr1:12045000-12050000	4.33046
chr1	11910000	11915000	chr1:12075000-12080000	2.57127
chr1	11980000	11985000	chr1:11905000-11910000	5.76427
chr1	12000000	12005000	chr1:12045000-12050000	2.65598
chr1	12000000	12005000	chr1:12075000-12080000	5.04914
chr1	12040000	12045000	chr1:12060000-12065000	2.67555
chr1	12040000	12045000	chr1:12065000-12070000	2.69266
chr1	12040000	12045000	chr1:12075000-12080000	6.55025
chr1	12045000	12050000	chr1:11905000-11910000	4.33046
chr1	12045000	12050000	chr1:12000000-12005000	2.65598
chr1	12045000	12050000	chr1:12065000-12070000	22.4221
chr1	12045000	12050000	chr1:12075000-12080000	12.3415
chr1	12060000	12065000	chr1:12040000-12045000	2.67555
chr1	12065000	12070000	chr1:12040000-12045000	2.69266
chr1	12065000	12070000	chr1:12045000-12050000	22.4221
chr1	12075000	12080000	chr1:11910000-11915000	2.57127
chr1	12075000	12080000	chr1:12000000-12005000	5.04914
chr1	12075000	12080000	chr1:12040000-12045000	6.55025
chr1	12075000	12080000	chr1:12045000-12050000	12.3415
chr1	12125000	12130000	chr1:12195000-12200000	10.2638
chr1	12125000	12130000	chr1:12200000-12205000	7.27088
chr1	12125000	12130000	chr1:12205000-12210000	12.356
chr1	12130000	12135000	chr1:12195000-12200000	2.2534
chr1	12145000	12150000	chr1:12165000-12170000	9.91812
chr1	12145000	12150000	chr1:12195000-12200000	7.763
chr1	12145000	12150000	chr1:12200000-12205000	8.76433
chr1	12145000	12150000	chr1:12205000-12210000	8.5493
chr1	12145000	12150000	chr1:12215000-12220000	2.20283
chr1	12155000	12160000	chr1:10985000-10990000	2.49445
chr1	12165000	12170000	chr1:12145000-12150000	9.91812
chr1	12170000	12175000	chr1:12195000-12200000	2.82577
chr1	12195000	12200000	chr1:12125000-12130000	10.2638
chr1	12195000	12200000	chr1:12130000-12135000	2.2534
chr1	12195000	12200000	chr1:12145000-12150000	7.763
chr1	12195000	12200000	chr1:12170000-12175000	2.82577
chr1	12200000	12205000	chr1:12125000-12130000	7.27088
chr1	12200000	12205000	chr1:12145000-12150000	8.76433
chr1	12205000	12210000	chr1:12125000-12130000	12.356
chr1	12205000	12210000	chr1:12145000-12150000	8.5493
chr1	12215000	12220000	chr1:12145000-12150000	2.20283
chr1	12270000	12275000	chr1:12615000-12620000	3.74429
chr1	12285000	12290000	chr1:12435000-12440000	2.28919
chr1	12285000	12290000	chr1:12615000-12620000	6.74959
chr1	12295000	12300000	chr1:12435000-12440000	14.3312
chr1	12295000	12300000	chr1:12615000-12620000	12.3532
chr1	12310000	12315000	chr1:12615000-12620000	4.17937
chr1	12315000	12320000	chr1:12615000-12620000	6.93601
chr1	12320000	12325000	chr1:12615000-12620000	6.17647
chr1	12325000	12330000	chr1:12615000-12620000	4.15704
chr1	12340000	12345000	chr1:12435000-12440000	5.5362
chr1	12340000	12345000	chr1:12615000-12620000	3.30955
chr1	12345000	12350000	chr1:12435000-12440000	6.86737
chr1	12345000	12350000	chr1:12445000-12450000	3.47401
chr1	12345000	12350000	chr1:12615000-12620000	2.51965
chr1	12430000	12435000	chr1:12615000-12620000	6.9277
chr1	12435000	12440000	chr1:12285000-12290000	2.28919
chr1	12435000	12440000	chr1:12295000-12300000	14.3312
chr1	12435000	12440000	chr1:12340000-12345000	5.5362
chr1	12435000	12440000	chr1:12345000-12350000	6.86737
chr1	12435000	12440000	chr1:12515000-12520000	4.08093
chr1	12435000	12440000	chr1:12590000-12595000	4.93326
chr1	12435000	12440000	chr1:12600000-12605000	24.0197
chr1	12435000	12440000	chr1:12610000-12615000	2.65374
chr1	12435000	12440000	chr1:12615000-12620000	101.291
chr1	12435000	12440000	chr1:12620000-12625000	2.22014
chr1	12435000	12440000	chr1:13700000-13705000	4.20393
chr1	12445000	12450000	chr1:12345000-12350000	3.47401
chr1	12445000	12450000	chr1:12600000-12605000	5.69632
chr1	12445000	12450000	chr1:12615000-12620000	7.64073
chr1	12450000	12455000	chr1:12615000-12620000	5.78396
chr1	12515000	12520000	chr1:12435000-12440000	4.08093
chr1	12590000	12595000	chr1:12435000-12440000	4.93326
chr1	12600000	12605000	chr1:12435000-12440000	24.0197
chr1	12600000	12605000	chr1:12445000-12450000	5.69632
chr1	12610000	12615000	chr1:12435000-12440000	2.65374
chr1	12615000	12620000	chr1:12270000-12275000	3.74429
chr1	12615000	12620000	chr1:12285000-12290000	6.74959
chr1	12615000	12620000	chr1:12295000-12300000	12.3532
chr1	12615000	12620000	chr1:12310000-12315000	4.17937
chr1	12615000	12620000	chr1:12315000-12320000	6.93601
chr1	12615000	12620000	chr1:12320000-12325000	6.17647
chr1	12615000	12620000	chr1:12325000-12330000	4.15704
chr1	12615000	12620000	chr1:12340000-12345000	3.30955
chr1	12615000	12620000	chr1:12345000-12350000	2.51965
chr1	12615000	12620000	chr1:12430000-12435000	6.9277
chr1	12615000	12620000	chr1:12435000-12440000	101.291
chr1	12615000	12620000	chr1:12445000-12450000	7.64073
chr1	12615000	12620000	chr1:12450000-12455000	5.78396
chr1	12620000	12625000	chr1:12435000-12440000	2.22014
chr1	13665000	13670000	chr1:13700000-13705000	11.2234
chr1	13665000	13670000	chr1:13725000-13730000	10.6657
chr1	13665000	13670000	chr1:13795000-13800000	4.13613
chr1	13670000	13675000	chr1:13700000-13705000	7.88192
chr1	13670000	13675000	chr1:13725000-13730000	3.53122
chr1	13695000	13700000	chr1:14515000-14520000	3.16972
chr1	13695000	13700000	chr1:14520000-14525000	4.85114
chr1	13700000	13705000	chr1:12435000-12440000	4.20393
chr1	13700000	13705000	chr1:13665000-13670000	11.2234
chr1	13700000	13705000	chr1:13670000-13675000	7.88192
chr1	13700000	13705000	chr1:13725000-13730000	57.5632
chr1	13700000	13705000	chr1:13730000-13735000	17.8091
chr1	13700000	13705000	chr1:13735000-13740000	7.45074
chr1	13700000	13705000	chr1:13740000-13745000	12.3572
chr1	13700000	13705000	chr1:13745000-13750000	10.6893
chr1	13700000	13705000	chr1:13750000-13755000	20.5386
chr1	13700000	13705000	chr1:13765000-13770000	3.36106
chr1	13700000	13705000	chr1:13795000-13800000	3.96009
chr1	13700000	13705000	chr1:14510000-14515000	3.99513
chr1	13700000	13705000	chr1:14515000-14520000	26.9993
chr1	13700000	13705000	chr1:14520000-14525000	26.6149
chr1	13700000	13705000	chr1:14540000-14545000	4.51864
chr1	13700000	13705000	chr1:14545000-14550000	2.07905
chr1	13700000	13705000	chr1:14620000-14625000	4.11922
chr1	13700000	13705000	chr1:14625000-14630000	2.5647
chr1	13700000	13705000	chr1:14630000-14635000	2.31568
chr1	13700000	13705000	chr1:14730000-14735000	4.72255
chr1	13700000	13705000	chr1:14735000-14740000	11.2363
chr1	13700000	13705000	chr1:14740000-14745000	14.0645
chr1	13700000	13705000	chr1:14745000-14750000	8.75216
chr1	13700000	13705000	chr1:14750000-14755000	12.1413
chr1	13700000	13705000	chr1:14755000-14760000	17.61
chr1	13700000	13705000	chr1:14760000-14765000	3.80979
chr1	13700000	13705000	chr1:14770000-14775000	2.93026
chr1	13700000	13705000	chr1:14905000-14910000	9.07095
chr1	13700000	13705000	chr1:15170000-15175000	2.95707
chr1	13700000	13705000	chr1:15175000-15180000	2.36352
chr1	13700000	13705000	chr1:15250000-15255000	6.09178
chr1	13700000	13705000	chr1:15410000-15415000	3.17432
chr1	13700000	13705000	chr1:15525000-15530000	2.53023
chr1	13710000	13715000	chr1:14515000-14520000	2.48085
chr1	13710000	13715000	chr1:14520000-14525000	5.52924
chr1	13725000	13730000	chr1:13665000-13670000	10.6657
chr1	13725000	13730000	chr1:13670000-13675000	3.53122
chr1	13725000	13730000	chr1:13700000-13705000	57.5632
chr1	13725000	13730000	chr1:14520000-14525000	4.62064
chr1	13725000	13730000	chr1:14740000-14745000	2.86527
chr1	13725000	13730000	chr1:14750000-14755000	4.30514
chr1	13730000	13735000	chr1:13700000-13705000	17.8091
chr1	13735000	13740000	chr1:13700000-13705000	7.45074
chr1	13740000	13745000	chr1:13700000-13705000	12.3572
chr1	13745000	13750000	chr1:13700000-13705000	10.6893
chr1	13750000	13755000	chr1:13700000-13705000	20.5386
chr1	13750000	13755000	chr1:14520000-14525000	2.10823
chr1	13765000	13770000	chr1:13700000-13705000	3.36106
chr1	13795000	13800000	chr1:13665000-13670000	4.13613
chr1	13795000	13800000	chr1:13700000-13705000	3.96009
chr1	14110000	14115000	chr1:14520000-14525000	4.51178
chr1	14110000	14115000	chr1:15045000-15050000	3.2223
chr1	14435000	14440000	chr1:14515000-14520000	2.90236
chr1	14510000	14515000	chr1:13700000-13705000	3.99513
chr1	14515000	14520000	chr1:13695000-13700000	3.16972
chr1	14515000	14520000	chr1:13700000-13705000	26.9993
chr1	14515000	14520000	chr1:13710000-13715000	2.48085
chr1	14515000	14520000	chr1:14435000-14440000	2.90236
chr1	14515000	14520000	chr1:14730000-14735000	11.7362
chr1	14515000	14520000	chr1:14735000-14740000	7.75862
chr1	14515000	14520000	chr1:14740000-14745000	13.5753
chr1	14515000	14520000	chr1:14745000-14750000	11.4283
chr1	14515000	14520000	chr1:14750000-14755000	6.8616
chr1	14515000	14520000	chr1:14755000-14760000	14.5839
chr1	14515000	14520000	chr1:14770000-14775000	3.48891
chr1	14515000	14520000	chr1:14780000-14785000	2.94581
chr1	14515000	14520000	chr1:14835000-14840000	10.1423
chr1	14515000	14520000	chr1:14845000-14850000	2.41775
chr1	14515000	14520000	chr1:14905000-14910000	11.2394
chr1	14515000	14520000	chr1:15045000-15050000	3.81776
chr1	14520000	14525000	chr1:13695000-13700000	4.85114
chr1	14520000	14525000	chr1:13700000-13705000	26.6149
chr1	14520000	14525000	chr1:13710000-13715000	5.52924
chr1	14520000	14525000	chr1:13725000-13730000	4.62064
chr1	14520000	14525000	chr1:13750000-13755000	2.10823
chr1	14520000	14525000	chr1:14110000-14115000	4.51178
chr1	14520000	14525000	chr1:14540000-14545000	2.35835
chr1	14520000	14525000	chr1:14570000-14575000	3.22221
chr1	14520000	14525000	chr1:14730000-14735000	18.0169
chr1	14520000	14525000	chr1:14735000-14740000	38.845
chr1	14520000	14525000	chr1:14740000-14745000	31.7135
chr1	14520000	14525000	chr1:14745000-14750000	16.1127
chr1	14520000	14525000	chr1:14750000-14755000	24.3546
chr1	14520000	14525000	chr1:14755000-14760000	19.1989
chr1	14520000	14525000	chr1:14760000-14765000	2.45483
chr1	14520000	14525000	chr1:14765000-14770000	2.57031
chr1	14520000	14525000	chr1:14770000-14775000	6.2946
chr1	14520000	14525000	chr1:14775000-14780000	2.56725
chr1	14520000	14525000	chr1:14810000-14815000	2.18294
chr1	14520000	14525000	chr1:14825000-14830000	11.0356
chr1	14520000	14525000	chr1:14835000-14840000	16.4196
chr1	14520000	14525000	chr1:14845000-14850000	4.43659
chr1	14520000	14525000	chr1:14850000-14855000	3.58515
chr1	14520000	14525000	chr1:14875000-14880000	2.48047
chr1	14520000	14525000	chr1:14900000-14905000	2.02691
chr1	14520000	14525000	chr1:14905000-14910000	18.5998
chr1	14520000	14525000	chr1:14910000-14915000	14.6317
chr1	14520000	14525000	chr1:15045000-15050000	7.66687
chr1	14520000	14525000	chr1:15110000-15115000	7.16596
chr1	14520000	14525000	chr1:15155000-15160000	5.77503
chr1	14520000	14525000	chr1:15160000-15165000	2.12706
chr1	14520000	14525000	chr1:15165000-15170000	3.87734
chr1	14520000	14525000	chr1:15170000-15175000	6.57884
chr1	14520000	14525000	chr1:15175000-15180000	3.69829
chr1	14520000	14525000	chr1:15230000-15235000	3.789
chr1	14520000	14525000	chr1:15245000-15250000	2.00058
chr1	14520000	14525000	chr1:15250000-15255000	5.0538
chr1	14520000	14525000	chr1:15255000-15260000	10.0501
chr1	14520000	14525000	chr1:15260000-15265000	2.68916
chr1	14520000	14525000	chr1:15280000-15285000	6.38285
chr1	14520000	14525000	chr1:15340000-15345000	4.16656
chr1	14520000	14525000	chr1:15410000-15415000	4.33196
chr1	14540000	14545000	chr1:13700000-13705000	4.51864
chr1	14540000	14545000	chr1:14520000-14525000	2.35835
chr1	14540000	14545000	chr1:14835000-14840000	3.67675
chr1	14540000	14545000	chr1:15045000-15050000	2.15784
chr1	14545000	14550000	chr1:13700000-13705000	2.07905
chr1	14565000	14570000	chr1:14730000-14735000	5.62565
chr1	14565000	14570000	chr1:15045000-15050000	15.7926
chr1	14570000	14575000	chr1:14520000-14525000	3.22221
chr1	14570000	14575000	chr1:15045000-15050000	2.12997
chr1	14600000	14605000	chr1:14730000-14735000	7.78056
chr1	14600000	14605000	chr1:14740000-14745000	6.95697
chr1	14600000	14605000	chr1:14750000-14755000	2.21899
chr1	14600000	14605000	chr1:14835000-14840000	4.23514
chr1	14600000	14605000	chr1:14905000-14910000	2.60073
chr1	14600000	14605000	chr1:14910000-14915000	3.07215
chr1	14600000	14605000	chr1:15045000-15050000	3.80228
chr1	14605000	14610000	chr1:15045000-15050000	13.7496
chr1	14610000	14615000	chr1:14730000-14735000	12.0978
chr1	14610000	14615000	chr1:14735000-14740000	7.08356
chr1	14610000	14615000	chr1:14740000-14745000	18.2823
chr1	14610000	14615000	chr1:14745000-14750000	7.34647
chr1	14610000	14615000	chr1:14750000-14755000	4.27574
chr1	14610000	14615000	chr1:14755000-14760000	12.9655
chr1	14610000	14615000	chr1:14825000-14830000	7.26362
chr1	14610000	14615000	chr1:14835000-14840000	4.30244
chr1	14610000	14615000	chr1:14845000-14850000	6.94379
chr1	14610000	14615000	chr1:14850000-14855000	5.98297
chr1	14610000	14615000	chr1:14905000-14910000	7.20118
chr1	14610000	14615000	chr1:14920000-14925000	2.21829
chr1	14610000	14615000	chr1:15045000-15050000	11.3223
chr1	14610000	14615000	chr1:15110000-15115000	2.36767
chr1	14615000	14620000	chr1:14730000-14735000	2.26704
chr1	14615000	14620000	chr1:14740000-14745000	4.22002
chr1	14615000	14620000	chr1:14745000-14750000	2.00378
chr1	14615000	14620000	chr1:14755000-14760000	2.82004
chr1	14615000	14620000	chr1:14780000-14785000	2.20054
chr1	14615000	14620000	chr1:14835000-14840000	2.55275
chr1	14620000	14625000	chr1:13700000-13705000	4.11922
chr1	14620000	14625000	chr1:14730000-14735000	6.72288
chr1	14620000	14625000	chr1:14735000-14740000	6.55851
chr1	14620000	14625000	chr1:14740000-14745000	4.85029
chr1	14620000	14625000	chr1:14745000-14750000	3.45028
chr1	14620000	14625000	chr1:14755000-14760000	5.53379
chr1	14620000	14625000	chr1:14775000-14780000	2.79364
chr1	14620000	14625000	chr1:14835000-14840000	5.88188
chr1	14620000	14625000	chr1:14845000-14850000	3.5112
chr1	14625000	14630000	chr1:13700000-13705000	2.5647
chr1	14625000	14630000	chr1:14710000-14715000	5.42637
chr1	14625000	14630000	chr1:14720000-14725000	2.66294
chr1	14625000	14630000	chr1:14730000-14735000	5.29937
chr1	14625000	14630000	chr1:14735000-14740000	5.71096
chr1	14625000	14630000	chr1:14740000-14745000	9.6454
chr1	14625000	14630000	chr1:14745000-14750000	4.77118
chr1	14625000	14630000	chr1:14750000-14755000	4.51638
chr1	14625000	14630000	chr1:14755000-14760000	5.50724
chr1	14625000	14630000	chr1:14825000-14830000	2.43513
chr1	14625000	14630000	chr1:14835000-14840000	5.88867
chr1	14625000	14630000	chr1:14845000-14850000	2.8987
chr1	14625000	14630000	chr1:14850000-14855000	4.02807
chr1	14625000	14630000	chr1:14905000-14910000	8.03354
chr1	14625000	14630000	chr1:14910000-14915000	3.20689
chr1	14625000	14630000	chr1:14915000-14920000	2.17376
chr1	14625000	14630000	chr1:15045000-15050000	2.82093
chr1	14630000	14635000	chr1:13700000-13705000	2.31568
chr1	14630000	14635000	chr1:14730000-14735000	2.16241
chr1	14650000	14655000	chr1:14905000-14910000	2.24698
chr1	14660000	14665000	chr1:14905000-14910000	2.70333
chr1	14710000	14715000	chr1:14625000-14630000	5.42637
chr1	14710000	14715000	chr1:14835000-14840000	2.25782
chr1	14720000	14725000	chr1:14625000-14630000	2.66294
chr1	14730000	14735000	chr1:13700000-13705000	4.72255
chr1	14730000	14735000	chr1:14515000-14520000	11.7362
chr1	14730000	14735000	chr1:14520000-14525000	18.0169
chr1	14730000	14735000	chr1:14565000-14570000	5.62565
chr1	14730000	14735000	chr1:14600000-14605000	7.78056
chr1	14730000	14735000	chr1:14610000-14615000	12.0978
chr1	14730000	14735000	chr1:14615000-14620000	2.26704
chr1	14730000	14735000	chr1:14620000-14625000	6.72288
chr1	14730000	14735000	chr1:14625000-14630000	5.29937
chr1	14730000	14735000	chr1:14630000-14635000	2.16241
chr1	14730000	14735000	chr1:14835000-14840000	4.70383
chr1	14730000	14735000	chr1:14845000-14850000	5.55769
chr1	14730000	14735000	chr1:14850000-14855000	3.27818
chr1	14730000	14735000	chr1:15045000-15050000	5.07203
chr1	14735000	14740000	chr1:13700000-13705000	11.2363
chr1	14735000	14740000	chr1:14515000-14520000	7.75862
chr1	14735000	14740000	chr1:14520000-14525000	38.845
chr1	14735000	14740000	chr1:14610000-14615000	7.08356
chr1	14735000	14740000	chr1:14620000-14625000	6.55851
chr1	14735000	14740000	chr1:14625000-14630000	5.71096
chr1	14735000	14740000	chr1:14850000-14855000	2.1524
chr1	14735000	14740000	chr1:14905000-14910000	5.38741
chr1	14735000	14740000	chr1:14910000-14915000	5.67492
chr1	14735000	14740000	chr1:15025000-15030000	3.21066
chr1	14735000	14740000	chr1:15045000-15050000	2.02172
chr1	14735000	14740000	chr1:15230000-15235000	2.77679
chr1	14735000	14740000	chr1:15250000-15255000	3.2171
chr1	14735000	14740000	chr1:15340000-15345000	2.91189
chr1	14740000	14745000	chr1:13700000-13705000	14.0645
chr1	14740000	14745000	chr1:13725000-13730000	2.86527
chr1	14740000	14745000	chr1:14515000-14520000	13.5753
chr1	14740000	14745000	chr1:14520000-14525000	31.7135
chr1	14740000	14745000	chr1:14600000-14605000	6.95697
chr1	14740000	14745000	chr1:14610000-14615000	18.2823
chr1	14740000	14745000	chr1:14615000-14620000	4.22002
chr1	14740000	14745000	chr1:14620000-14625000	4.85029
chr1	14740000	14745000	chr1:14625000-14630000	9.6454
chr1	14740000	14745000	chr1:14835000-14840000	5.14134
chr1	14740000	14745000	chr1:14905000-14910000	4.84287
chr1	14740000	14745000	chr1:14910000-14915000	7.17699
chr1	14740000	14745000	chr1:15045000-15050000	3.9242
chr1	14740000	14745000	chr1:15110000-15115000	2.49025
chr1	14740000	14745000	chr1:15165000-15170000	2.1817
chr1	14740000	14745000	chr1:15230000-15235000	3.60772
chr1	14745000	14750000	chr1:13700000-13705000	8.75216
chr1	14745000	14750000	chr1:14515000-14520000	11.4283
chr1	14745000	14750000	chr1:14520000-14525000	16.1127
chr1	14745000	14750000	chr1:14610000-14615000	7.34647
chr1	14745000	14750000	chr1:14615000-14620000	2.00378
chr1	14745000	14750000	chr1:14620000-14625000	3.45028
chr1	14745000	14750000	chr1:14625000-14630000	4.77118
chr1	14745000	14750000	chr1:14845000-14850000	2.88249
chr1	14745000	14750000	chr1:15045000-15050000	2.21782
chr1	14745000	14750000	chr1:15165000-15170000	2.55203
chr1	14745000	14750000	chr1:15250000-15255000	5.07624
chr1	14750000	14755000	chr1:13700000-13705000	12.1413
chr1	14750000	14755000	chr1:13725000-13730000	4.30514
chr1	14750000	14755000	chr1:14515000-14520000	6.8616
chr1	14750000	14755000	chr1:14520000-14525000	24.3546
chr1	14750000	14755000	chr1:14600000-14605000	2.21899
chr1	14750000	14755000	chr1:14610000-14615000	4.27574
chr1	14750000	14755000	chr1:14625000-14630000	4.51638
chr1	14755000	14760000	chr1:13700000-13705000	17.61
chr1	14755000	14760000	chr1:14515000-14520000	14.5839
chr1	14755000	14760000	chr1:14520000-14525000	19.1989
chr1	14755000	14760000	chr1:14610000-14615000	12.9655
chr1	14755000	14760000	chr1:14615000-14620000	2.82004
chr1	14755000	14760000	chr1:14620000-14625000	5.53379
chr1	14755000	14760000	chr1:14625000-14630000	5.50724
chr1	14755000	14760000	chr1:14845000-14850000	2.54843
chr1	14755000	14760000	chr1:14905000-14910000	8.78651
chr1	14755000	14760000	chr1:14910000-14915000	3.98978
chr1	14755000	14760000	chr1:14915000-14920000	2.72202
chr1	14755000	14760000	chr1:15045000-15050000	5.65594
chr1	14760000	14765000	chr1:13700000-13705000	3.80979
chr1	14760000	14765000	chr1:14520000-14525000	2.45483
chr1	14765000	14770000	chr1:14520000-14525000	2.57031
chr1	14770000	14775000	chr1:13700000-13705000	2.93026
chr1	14770000	14775000	chr1:14515000-14520000	3.48891
chr1	14770000	14775000	chr1:14520000-14525000	6.2946
chr1	14775000	14780000	chr1:14520000-14525000	2.56725
chr1	14775000	14780000	chr1:14620000-14625000	2.79364
chr1	14775000	14780000	chr1:15045000-15050000	2.13455
chr1	14780000	14785000	chr1:14515000-14520000	2.94581
chr1	14780000	14785000	chr1:14615000-14620000	2.20054
chr1	14810000	14815000	chr1:14520000-14525000	2.18294
chr1	14825000	14830000	chr1:14520000-14525000	11.0356
chr1	14825000	14830000	chr1:14610000-14615000	7.26362
chr1	14825000	14830000	chr1:14625000-14630000	2.43513
chr1	14835000	14840000	chr1:14515000-14520000	10.1423
chr1	14835000	14840000	chr1:14520000-14525000	16.4196
chr1	14835000	14840000	chr1:14540000-14545000	3.67675
chr1	14835000	14840000	chr1:14600000-14605000	4.23514
chr1	14835000	14840000	chr1:14610000-14615000	4.30244
chr1	14835000	14840000	chr1:14615000-14620000	2.55275
chr1	14835000	14840000	chr1:14620000-14625000	5.88188
chr1	14835000	14840000	chr1:14625000-14630000	5.88867
chr1	14835000	14840000	chr1:14710000-14715000	2.25782
chr1	14835000	14840000	chr1:14730000-14735000	4.70383
chr1	14835000	14840000	chr1:14740000-14745000	5.14134
chr1	14835000	14840000	chr1:15045000-15050000	2.87084
chr1	14845000	14850000	chr1:14515000-14520000	2.41775
chr1	14845000	14850000	chr1:14520000-14525000	4.43659
chr1	14845000	14850000	chr1:14610000-14615000	6.94379
chr1	14845000	14850000	chr1:14620000-14625000	3.5112
chr1	14845000	14850000	chr1:14625000-14630000	2.8987
chr1	14845000	14850000	chr1:14730000-14735000	5.55769
chr1	14845000	14850000	chr1:14745000-14750000	2.88249
chr1	14845000	14850000	chr1:14755000-14760000	2.54843
chr1	14850000	14855000	chr1:14520000-14525000	3.58515
chr1	14850000	14855000	chr1:14610000-14615000	5.98297
chr1	14850000	14855000	chr1:14625000-14630000	4.02807
chr1	14850000	14855000	chr1:14730000-14735000	3.27818
chr1	14850000	14855000	chr1:14735000-14740000	2.1524
chr1	14850000	14855000	chr1:15045000-15050000	4.1034
chr1	14875000	14880000	chr1:14520000-14525000	2.48047
chr1	14900000	14905000	chr1:14520000-14525000	2.02691
chr1	14905000	14910000	chr1:13700000-13705000	9.07095
chr1	14905000	14910000	chr1:14515000-14520000	11.2394
chr1	14905000	14910000	chr1:14520000-14525000	18.5998
chr1	14905000	14910000	chr1:14600000-14605000	2.60073
chr1	14905000	14910000	chr1:14610000-14615000	7.20118
chr1	14905000	14910000	chr1:14625000-14630000	8.03354
chr1	14905000	14910000	chr1:14650000-14655000	2.24698
chr1	14905000	14910000	chr1:14660000-14665000	2.70333
chr1	14905000	14910000	chr1:14735000-14740000	5.38741
chr1	14905000	14910000	chr1:14740000-14745000	4.84287
chr1	14905000	14910000	chr1:14755000-14760000	8.78651
chr1	14910000	14915000	chr1:14520000-14525000	14.6317
chr1	14910000	14915000	chr1:14600000-14605000	3.07215
chr1	14910000	14915000	chr1:14625000-14630000	3.20689
chr1	14910000	14915000	chr1:14735000-14740000	5.67492
chr1	14910000	14915000	chr1:14740000-14745000	7.17699
chr1	14910000	14915000	chr1:14755000-14760000	3.98978
chr1	14915000	14920000	chr1:14625000-14630000	2.17376
chr1	14915000	14920000	chr1:14755000-14760000	2.72202
chr1	14920000	14925000	chr1:14610000-14615000	2.21829
chr1	15025000	15030000	chr1:14735000-14740000	3.21066
chr1	15045000	15050000	chr1:14110000-14115000	3.2223
chr1	15045000	15050000	chr1:14515000-14520000	3.81776
chr1	15045000	15050000	chr1:14520000-14525000	7.66687
chr1	15045000	15050000	chr1:14540000-14545000	2.15784
chr1	15045000	15050000	chr1:14565000-14570000	15.7926
chr1	15045000	15050000	chr1:14570000-14575000	2.12997
chr1	15045000	15050000	chr1:14600000-14605000	3.80228
chr1	15045000	15050000	chr1:14605000-14610000	13.7496
chr1	15045000	15050000	chr1:14610000-14615000	11.3223
chr1	15045000	15050000	chr1:14625000-14630000	2.82093
chr1	15045000	15050000	chr1:14730000-14735000	5.07203
chr1	15045000	15050000	chr1:14735000-14740000	2.02172
chr1	15045000	15050000	chr1:14740000-14745000	3.9242
chr1	15045000	15050000	chr1:14745000-14750000	2.21782
chr1	15045000	15050000	chr1:14755000-14760000	5.65594
chr1	15045000	15050000	chr1:14775000-14780000	2.13455
chr1	15045000	15050000	chr1:14835000-14840000	2.87084
chr1	15045000	15050000	chr1:14850000-14855000	4.1034
chr1	15110000	15115000	chr1:14520000-14525000	7.16596
chr1	15110000	15115000	chr1:14610000-14615000	2.36767
chr1	15110000	15115000	chr1:14740000-14745000	2.49025
chr1	15110000	15115000	chr1:15270000-15275000	3.09201
chr1	15110000	15115000	chr1:15280000-15285000	4.6552
chr1	15110000	15115000	chr1:15300000-15305000	3.07647
chr1	15125000	15130000	chr1:15230000-15235000	10.5498
chr1	15125000	15130000	chr1:15250000-15255000	5.35283
chr1	15125000	15130000	chr1:15265000-15270000	2.11922
chr1	15125000	15130000	chr1:15270000-15275000	21.1422
chr1	15125000	15130000	chr1:15280000-15285000	6.18472
chr1	15125000	15130000	chr1:15300000-15305000	15.1197
chr1	15130000	15135000	chr1:15250000-15255000	4.63477
chr1	15130000	15135000	chr1:15255000-15260000	5.69841
chr1	15130000	15135000	chr1:15270000-15275000	6.96783
chr1	15130000	15135000	chr1:15300000-15305000	3.43501
chr1	15135000	15140000	chr1:15230000-15235000	3.00212
chr1	15135000	15140000	chr1:15250000-15255000	2.90593
chr1	15135000	15140000	chr1:15255000-15260000	2.34404
chr1	15135000	15140000	chr1:15270000-15275000	6.01189
chr1	15135000	15140000	chr1:15300000-15305000	2.26992
chr1	15150000	15155000	chr1:15230000-15235000	2.92793
chr1	15150000	15155000	chr1:15250000-15255000	7.59353
chr1	15150000	15155000	chr1:15255000-15260000	3.47762
chr1	15150000	15155000	chr1:15260000-15265000	2.22218
chr1	15150000	15155000	chr1:15265000-15270000	2.44447
chr1	15150000	15155000	chr1:15270000-15275000	8.71517
chr1	15150000	15155000	chr1:15280000-15285000	9.27907
chr1	15150000	15155000	chr1:15285000-15290000	2.45622
chr1	15150000	15155000	chr1:15300000-15305000	4.49852
chr1	15155000	15160000	chr1:14520000-14525000	5.77503
chr1	15155000	15160000	chr1:15250000-15255000	16.6672
chr1	15155000	15160000	chr1:15255000-15260000	3.30302
chr1	15155000	15160000	chr1:15260000-15265000	4.05571
chr1	15155000	15160000	chr1:15265000-15270000	3.84922
chr1	15155000	15160000	chr1:15270000-15275000	9.96868
chr1	15155000	15160000	chr1:15280000-15285000	3.79199
chr1	15155000	15160000	chr1:15300000-15305000	5.44675
chr1	15160000	15165000	chr1:14520000-14525000	2.12706
chr1	15160000	15165000	chr1:15250000-15255000	6.7307
chr1	15160000	15165000	chr1:15270000-15275000	5.07959
chr1	15165000	15170000	chr1:14520000-14525000	3.87734
chr1	15165000	15170000	chr1:14740000-14745000	2.1817
chr1	15165000	15170000	chr1:14745000-14750000	2.55203
chr1	15165000	15170000	chr1:15250000-15255000	6.28998
chr1	15165000	15170000	chr1:15255000-15260000	5.16396
chr1	15165000	15170000	chr1:15260000-15265000	3.33992
chr1	15165000	15170000	chr1:15265000-15270000	2.59585
chr1	15165000	15170000	chr1:15270000-15275000	3.38694
chr1	15165000	15170000	chr1:15280000-15285000	5.92207
chr1	15170000	15175000	chr1:13700000-13705000	2.95707
chr1	15170000	15175000	chr1:14520000-14525000	6.57884
chr1	15170000	15175000	chr1:15250000-15255000	4.5701
chr1	15170000	15175000	chr1:15270000-15275000	3.35113
chr1	15175000	15180000	chr1:13700000-13705000	2.36352
chr1	15175000	15180000	chr1:14520000-14525000	3.69829
chr1	15175000	15180000	chr1:15230000-15235000	3.43799
chr1	15175000	15180000	chr1:15250000-15255000	5.3197
chr1	15175000	15180000	chr1:15270000-15275000	4.88976
chr1	15175000	15180000	chr1:15280000-15285000	4.58752
chr1	15190000	15195000	chr1:15270000-15275000	2.20568
chr1	15230000	15235000	chr1:14520000-14525000	3.789
chr1	15230000	15235000	chr1:14735000-14740000	2.77679
chr1	15230000	15235000	chr1:14740000-14745000	3.60772
chr1	15230000	15235000	chr1:15125000-15130000	10.5498
chr1	15230000	15235000	chr1:15135000-15140000	3.00212
chr1	15230000	15235000	chr1:15150000-15155000	2.92793
chr1	15230000	15235000	chr1:15175000-15180000	3.43799
chr1	15230000	15235000	chr1:15250000-15255000	9.93304
chr1	15245000	15250000	chr1:14520000-14525000	2.00058
chr1	15250000	15255000	chr1:13700000-13705000	6.09178
chr1	15250000	15255000	chr1:14520000-14525000	5.0538
chr1	15250000	15255000	chr1:14735000-14740000	3.2171
chr1	15250000	15255000	chr1:14745000-14750000	5.07624
chr1	15250000	15255000	chr1:15125000-15130000	5.35283
chr1	15250000	15255000	chr1:15130000-15135000	4.63477
chr1	15250000	15255000	chr1:15135000-15140000	2.90593
chr1	15250000	15255000	chr1:15150000-15155000	7.59353
chr1	15250000	15255000	chr1:15155000-15160000	16.6672
chr1	15250000	15255000	chr1:15160000-15165000	6.7307
chr1	15250000	15255000	chr1:15165000-15170000	6.28998
chr1	15250000	15255000	chr1:15170000-15175000	4.5701
chr1	15250000	15255000	chr1:15175000-15180000	5.3197
chr1	15250000	15255000	chr1:15230000-15235000	9.93304
chr1	15255000	15260000	chr1:14520000-14525000	10.0501
chr1	15255000	15260000	chr1:15130000-15135000	5.69841
chr1	15255000	15260000	chr1:15135000-15140000	2.34404
chr1	15255000	15260000	chr1:15150000-15155000	3.47762
chr1	15255000	15260000	chr1:15155000-15160000	3.30302
chr1	15255000	15260000	chr1:15165000-15170000	5.16396
chr1	15260000	15265000	chr1:14520000-14525000	2.68916
chr1	15260000	15265000	chr1:15150000-15155000	2.22218
chr1	15260000	15265000	chr1:15155000-15160000	4.05571
chr1	15260000	15265000	chr1:15165000-15170000	3.33992
chr1	15265000	15270000	chr1:15125000-15130000	2.11922
chr1	15265000	15270000	chr1:15150000-15155000	2.44447
chr1	15265000	15270000	chr1:15155000-15160000	3.84922
chr1	15265000	15270000	chr1:15165000-15170000	2.59585
chr1	15270000	15275000	chr1:15110000-15115000	3.09201
chr1	15270000	15275000	chr1:15125000-15130000	21.1422
chr1	15270000	15275000	chr1:15130000-15135000	6.96783
chr1	15270000	15275000	chr1:15135000-15140000	6.01189
chr1	15270000	15275000	chr1:15150000-15155000	8.71517
chr1	15270000	15275000	chr1:15155000-15160000	9.96868
chr1	15270000	15275000	chr1:15160000-15165000	5.07959
chr1	15270000	15275000	chr1:15165000-15170000	3.38694
chr1	15270000	15275000	chr1:15170000-15175000	3.35113
chr1	15270000	15275000	chr1:15175000-15180000	4.88976
chr1	15270000	15275000	chr1:15190000-15195000	2.20568
chr1	15280000	15285000	chr1:14520000-14525000	6.38285
chr1	15280000	15285000	chr1:15110000-15115000	4.6552
chr1	15280000	15285000	chr1:15125000-15130000	6.18472
chr1	15280000	15285000	chr1:15150000-15155000	9.27907
chr1	15280000	15285000	chr1:15155000-15160000	3.79199
chr1	15280000	15285000	chr1:15165000-15170000	5.92207
chr1	15280000	15285000	chr1:15175000-15180000	4.58752
chr1	15285000	15290000	chr1:15150000-15155000	2.45622
chr1	15300000	15305000	chr1:15110000-15115000	3.07647
chr1	15300000	15305000	chr1:15125000-15130000	15.1197
chr1	15300000	15305000	chr1:15130000-15135000	3.43501
chr1	15300000	15305000	chr1:15135000-15140000	2.26992
chr1	15300000	15305000	chr1:15150000-15155000	4.49852
chr1	15300000	15305000	chr1:15155000-15160000	5.44675
chr1	15340000	15345000	chr1:14520000-14525000	4.16656
chr1	15340000	15345000	chr1:14735000-14740000	2.91189
chr1	15340000	15345000	chr1:15405000-15410000	2.64827
chr1	15340000	15345000	chr1:15410000-15415000	9.64978
chr1	15340000	15345000	chr1:15415000-15420000	4.79026
chr1	15340000	15345000	chr1:15425000-15430000	2.12431
chr1	15340000	15345000	chr1:15435000-15440000	3.82096
chr1	15345000	15350000	chr1:15410000-15415000	5.69569
chr1	15345000	15350000	chr1:15415000-15420000	4.6104
chr1	15405000	15410000	chr1:15340000-15345000	2.64827
chr1	15410000	15415000	chr1:13700000-13705000	3.17432
chr1	15410000	15415000	chr1:14520000-14525000	4.33196
chr1	15410000	15415000	chr1:15340000-15345000	9.64978
chr1	15410000	15415000	chr1:15345000-15350000	5.69569
chr1	15415000	15420000	chr1:15340000-15345000	4.79026
chr1	15415000	15420000	chr1:15345000-15350000	4.6104
chr1	15425000	15430000	chr1:15340000-15345000	2.12431
chr1	15435000	15440000	chr1:15340000-15345000	3.82096
chr1	15525000	15530000	chr1:13700000-13705000	2.53023
chr1	15525000	15530000	chr1:15615000-15620000	2.08002
chr1	15525000	15530000	chr1:15625000-15630000	2.62194
chr1	15525000	15530000	chr1:15960000-15965000	2.52415
chr1	15595000	15600000	chr1:15695000-15700000	2.36332
chr1	15615000	15620000	chr1:15525000-15530000	2.08002
chr1	15625000	15630000	chr1:15525000-15530000	2.62194
chr1	15695000	15700000	chr1:15595000-15600000	2.36332
chr1	15790000	15795000	chr1:15915000-15920000	4.0459
chr1	15790000	15795000	chr1:15960000-15965000	3.01314
chr1	15795000	15800000	chr1:15915000-15920000	4.40082
chr1	15795000	15800000	chr1:15960000-15965000	3.00876
chr1	15795000	15800000	chr1:15965000-15970000	3.88996
chr1	15795000	15800000	chr1:15975000-15980000	2.68631
chr1	15795000	15800000	chr1:16005000-16010000	5.06775
chr1	15795000	15800000	chr1:16045000-16050000	3.08917
chr1	15815000	15820000	chr1:15915000-15920000	9.44507
chr1	15815000	15820000	chr1:15960000-15965000	2.59994
chr1	15830000	15835000	chr1:15850000-15855000	4.3817
chr1	15830000	15835000	chr1:15915000-15920000	3.83705
chr1	15830000	15835000	chr1:15960000-15965000	6.40424
chr1	15830000	15835000	chr1:15965000-15970000	5.12162
chr1	15840000	15845000	chr1:15965000-15970000	3.4221
chr1	15845000	15850000	chr1:15915000-15920000	5.19339
chr1	15845000	15850000	chr1:15960000-15965000	3.39472
chr1	15845000	15850000	chr1:15965000-15970000	2.74552
chr1	15850000	15855000	chr1:15830000-15835000	4.3817
chr1	15850000	15855000	chr1:15915000-15920000	7.02491
chr1	15850000	15855000	chr1:15965000-15970000	5.57641
chr1	15850000	15855000	chr1:16365000-16370000	3.22091
chr1	15915000	15920000	chr1:15790000-15795000	4.0459
chr1	15915000	15920000	chr1:15795000-15800000	4.40082
chr1	15915000	15920000	chr1:15815000-15820000	9.44507
chr1	15915000	15920000	chr1:15830000-15835000	3.83705
chr1	15915000	15920000	chr1:15845000-15850000	5.19339
chr1	15915000	15920000	chr1:15850000-15855000	7.02491
chr1	15915000	15920000	chr1:15960000-15965000	2.22839
chr1	15915000	15920000	chr1:15965000-15970000	4.46381
chr1	15960000	15965000	chr1:15525000-15530000	2.52415
chr1	15960000	15965000	chr1:15790000-15795000	3.01314
chr1	15960000	15965000	chr1:15795000-15800000	3.00876
chr1	15960000	15965000	chr1:15815000-15820000	2.59994
chr1	15960000	15965000	chr1:15830000-15835000	6.40424
chr1	15960000	15965000	chr1:15845000-15850000	3.39472
chr1	15960000	15965000	chr1:15915000-15920000	2.22839
chr1	15965000	15970000	chr1:15795000-15800000	3.88996
chr1	15965000	15970000	chr1:15830000-15835000	5.12162
chr1	15965000	15970000	chr1:15840000-15845000	3.4221
chr1	15965000	15970000	chr1:15845000-15850000	2.74552
chr1	15965000	15970000	chr1:15850000-15855000	5.57641
chr1	15965000	15970000	chr1:15915000-15920000	4.46381
chr1	15965000	15970000	chr1:16365000-16370000	2.22904
chr1	15975000	15980000	chr1:15795000-15800000	2.68631
chr1	16005000	16010000	chr1:15795000-15800000	5.06775
chr1	16005000	16010000	chr1:16045000-16050000	2.43411
chr1	16010000	16015000	chr1:16045000-16050000	3.81892
chr1	16010000	16015000	chr1:16050000-16055000	6.40133
chr1	16010000	16015000	chr1:16055000-16060000	4.0004
chr1	16010000	16015000	chr1:16075000-16080000	3.93823
chr1	16010000	16015000	chr1:16235000-16240000	3.82576
chr1	16045000	16050000	chr1:15795000-15800000	3.08917
chr1	16045000	16050000	chr1:16005000-16010000	2.43411
chr1	16045000	16050000	chr1:16010000-16015000	3.81892
chr1	16050000	16055000	chr1:16010000-16015000	6.40133
chr1	16055000	16060000	chr1:16010000-16015000	4.0004
chr1	16075000	16080000	chr1:16010000-16015000	3.93823
chr1	16075000	16080000	chr1:16180000-16185000	10.2229
chr1	16075000	16080000	chr1:16185000-16190000	25.4782
chr1	16075000	16080000	chr1:16235000-16240000	13.5965
chr1	16075000	16080000	chr1:16365000-16370000	2.24784
chr1	16080000	16085000	chr1:16150000-16155000	2.0397
chr1	16080000	16085000	chr1:16180000-16185000	21.189
chr1	16080000	16085000	chr1:16185000-16190000	47.9793
chr1	16080000	16085000	chr1:16205000-16210000	4.03065
chr1	16080000	16085000	chr1:16235000-16240000	9.27513
chr1	16090000	16095000	chr1:16185000-16190000	3.56794
chr1	16110000	16115000	chr1:16165000-16170000	2.30516
chr1	16120000	16125000	chr1:16140000-16145000	2.20279
chr1	16140000	16145000	chr1:16120000-16125000	2.20279
chr1	16150000	16155000	chr1:16080000-16085000	2.0397
chr1	16165000	16170000	chr1:16110000-16115000	2.30516
chr1	16180000	16185000	chr1:16075000-16080000	10.2229
chr1	16180000	16185000	chr1:16080000-16085000	21.189
chr1	16185000	16190000	chr1:16075000-16080000	25.4782
chr1	16185000	16190000	chr1:16080000-16085000	47.9793
chr1	16185000	16190000	chr1:16090000-16095000	3.56794
chr1	16185000	16190000	chr1:16235000-16240000	2.68239
chr1	16195000	16200000	chr1:16235000-16240000	3.53236
chr1	16205000	16210000	chr1:16080000-16085000	4.03065
chr1	16205000	16210000	chr1:16235000-16240000	7.29174
chr1	16210000	16215000	chr1:16235000-16240000	6.09802
chr1	16215000	16220000	chr1:16235000-16240000	5.5356
chr1	16215000	16220000	chr1:16365000-16370000	2.29287
chr1	16235000	16240000	chr1:16010000-16015000	3.82576
chr1	16235000	16240000	chr1:16075000-16080000	13.5965
chr1	16235000	16240000	chr1:16080000-16085000	9.27513
chr1	16235000	16240000	chr1:16185000-16190000	2.68239
chr1	16235000	16240000	chr1:16195000-16200000	3.53236
chr1	16235000	16240000	chr1:16205000-16210000	7.29174
chr1	16235000	16240000	chr1:16210000-16215000	6.09802
chr1	16235000	16240000	chr1:16215000-16220000	5.5356
chr1	16235000	16240000	chr1:16365000-16370000	3.69507
chr1	16320000	16325000	chr1:16350000-16355000	3.34224
chr1	16350000	16355000	chr1:16320000-16325000	3.34224
chr1	16365000	16370000	chr1:15850000-15855000	3.22091
chr1	16365000	16370000	chr1:15965000-15970000	2.22904
chr1	16365000	16370000	chr1:16075000-16080000	2.24784
chr1	16365000	16370000	chr1:16215000-16220000	2.29287
chr1	16365000	16370000	chr1:16235000-16240000	3.69507
chr1	16365000	16370000	chr1:16385000-16390000	13.5831
chr1	16365000	16370000	chr1:16420000-16425000	2.81873
chr1	16365000	16370000	chr1:16430000-16435000	4.30927
chr1	16365000	16370000	chr1:16440000-16445000	10.383
chr1	16365000	16370000	chr1:16450000-16455000	4.55085
chr1	16365000	16370000	chr1:16495000-16500000	2.47211
chr1	16365000	16370000	chr1:16510000-16515000	14.4297
chr1	16370000	16375000	chr1:16420000-16425000	3.74958
chr1	16385000	16390000	chr1:16365000-16370000	13.5831
chr1	16385000	16390000	chr1:16420000-16425000	2.744
chr1	16385000	16390000	chr1:16440000-16445000	2.08983
chr1	16390000	16395000	chr1:16420000-16425000	2.31905
chr1	16420000	16425000	chr1:16365000-16370000	2.81873
chr1	16420000	16425000	chr1:16370000-16375000	3.74958
chr1	16420000	16425000	chr1:16385000-16390000	2.744
chr1	16420000	16425000	chr1:16390000-16395000	2.31905
chr1	16420000	16425000	chr1:16440000-16445000	4.12712
chr1	16430000	16435000	chr1:16365000-16370000	4.30927
chr1	16440000	16445000	chr1:16365000-16370000	10.383
chr1	16440000	16445000	chr1:16385000-16390000	2.08983
chr1	16440000	16445000	chr1:16420000-16425000	4.12712
chr1	16440000	16445000	chr1:16490000-16495000	3.20178
chr1	16440000	16445000	chr1:16510000-16515000	7.93055
chr1	16450000	16455000	chr1:16365000-16370000	4.55085
chr1	16450000	16455000	chr1:16470000-16475000	2.48392
chr1	16450000	16455000	chr1:16490000-16495000	6.21035
chr1	16470000	16475000	chr1:16450000-16455000	2.48392
chr1	16470000	16475000	chr1:16490000-16495000	2.76172
chr1	16490000	16495000	chr1:16440000-16445000	3.20178
chr1	16490000	16495000	chr1:16450000-16455000	6.21035
chr1	16490000	16495000	chr1:16470000-16475000	2.76172
chr1	16495000	16500000	chr1:16365000-16370000	2.47211
chr1	16510000	16515000	chr1:16365000-16370000	14.4297
chr1	16510000	16515000	chr1:16440000-16445000	7.93055
chr1	16510000	16515000	chr1:16635000-16640000	4.95059
chr1	16510000	16515000	chr1:16640000-16645000	9.74783
chr1	16510000	16515000	chr1:16895000-16900000	13.4896
chr1	16510000	16515000	chr1:16900000-16905000	5.56606
chr1	16565000	16570000	chr1:16640000-16645000	4.69583
chr1	16635000	16640000	chr1:16510000-16515000	4.95059
chr1	16640000	16645000	chr1:16510000-16515000	9.74783
chr1	16640000	16645000	chr1:16565000-16570000	4.69583
chr1	16895000	16900000	chr1:16510000-16515000	13.4896
chr1	16900000	16905000	chr1:16510000-16515000	5.56606
chr1	17060000	17065000	chr1:17120000-17125000	4.9453
chr1	17075000	17080000	chr1:17110000-17115000	3.17439
chr1	17075000	17080000	chr1:17120000-17125000	4.51634
chr1	17095000	17100000	chr1:17120000-17125000	4.12116
chr1	17110000	17115000	chr1:17075000-17080000	3.17439
chr1	17120000	17125000	chr1:17060000-17065000	4.9453
chr1	17120000	17125000	chr1:17075000-17080000	4.51634
chr1	17120000	17125000	chr1:17095000-17100000	4.12116
chr1	17120000	17125000	chr1:17230000-17235000	4.41982
chr1	17120000	17125000	chr1:17235000-17240000	10.1775
chr1	17125000	17130000	chr1:17205000-17210000	2.49267
chr1	17125000	17130000	chr1:17230000-17235000	26.8024
chr1	17125000	17130000	chr1:17235000-17240000	22.655
chr1	17140000	17145000	chr1:17195000-17200000	2.93434
chr1	17140000	17145000	chr1:17200000-17205000	2.93656
chr1	17140000	17145000	chr1:17210000-17215000	2.69665
chr1	17140000	17145000	chr1:17230000-17235000	17.2302
chr1	17140000	17145000	chr1:17235000-17240000	4.85636
chr1	17140000	17145000	chr1:17245000-17250000	2.56408
chr1	17195000	17200000	chr1:17140000-17145000	2.93434
chr1	17200000	17205000	chr1:17140000-17145000	2.93656
chr1	17205000	17210000	chr1:17125000-17130000	2.49267
chr1	17210000	17215000	chr1:17140000-17145000	2.69665
chr1	17230000	17235000	chr1:17120000-17125000	4.41982
chr1	17230000	17235000	chr1:17125000-17130000	26.8024
chr1	17230000	17235000	chr1:17140000-17145000	17.2302
chr1	17235000	17240000	chr1:17120000-17125000	10.1775
chr1	17235000	17240000	chr1:17125000-17130000	22.655
chr1	17235000	17240000	chr1:17140000-17145000	4.85636
chr1	17245000	17250000	chr1:17140000-17145000	2.56408
chr1	17440000	17445000	chr1:17485000-17490000	9.08289
chr1	17485000	17490000	chr1:17440000-17445000	9.08289
chr1	17485000	17490000	chr1:17605000-17610000	3.76844
chr1	17490000	17495000	chr1:17580000-17585000	2.90277
chr1	17490000	17495000	chr1:17600000-17605000	4.56908
chr1	17490000	17495000	chr1:17605000-17610000	4.37459
chr1	17500000	17505000	chr1:17600000-17605000	3.68057
chr1	17500000	17505000	chr1:17605000-17610000	4.02792
chr1	17535000	17540000	chr1:18280000-18285000	2.91912
chr1	17550000	17555000	chr1:17600000-17605000	2.35374
chr1	17580000	17585000	chr1:17490000-17495000	2.90277
chr1	17600000	17605000	chr1:17490000-17495000	4.56908
chr1	17600000	17605000	chr1:17500000-17505000	3.68057
chr1	17600000	17605000	chr1:17550000-17555000	2.35374
chr1	17605000	17610000	chr1:17485000-17490000	3.76844
chr1	17605000	17610000	chr1:17490000-17495000	4.37459
chr1	17605000	17610000	chr1:17500000-17505000	4.02792
chr1	18280000	18285000	chr1:17535000-17540000	2.91912
chr1	18280000	18285000	chr1:18300000-18305000	5.79052
chr1	18280000	18285000	chr1:18320000-18325000	2.68519
chr1	18280000	18285000	chr1:18335000-18340000	7.90768
chr1	18280000	18285000	chr1:18340000-18345000	12.2669
chr1	18280000	18285000	chr1:18345000-18350000	2.61721
chr1	18280000	18285000	chr1:18950000-18955000	5.88401
chr1	18285000	18290000	chr1:18340000-18345000	2.38308
chr1	18300000	18305000	chr1:18280000-18285000	5.79052
chr1	18320000	18325000	chr1:18280000-18285000	2.68519
chr1	18335000	18340000	chr1:18280000-18285000	7.90768
chr1	18340000	18345000	chr1:18280000-18285000	12.2669
[truncated: 325,166+ more rows]
