# Supplementary material for: A scalable computational framework for predicting gene expression from candidate cis -regulatory elements
Source: HighWire-hosted journal article supplement (doi:10.1101/gr.281219.125), 2026-01-16
Supplement: Supplemental_Table_S6.xlsx [file Supplemental_Table_S6.xlsx]

## Sheet: Supplemental_Table_S6
Summary of chromatin loops from K562 at the 5kb resolution
chr1	775000	780000	chr1:815000-820000	2.10925
chr1	775000	780000	chr1:820000-825000	28.4294
chr1	775000	780000	chr1:825000-830000	11.6859
chr1	775000	780000	chr1:840000-845000	5.85712
chr1	775000	780000	chr1:960000-965000	2.39045
chr1	815000	820000	chr1:775000-780000	2.10925
chr1	820000	825000	chr1:775000-780000	28.4294
chr1	825000	830000	chr1:775000-780000	11.6859
chr1	840000	845000	chr1:775000-780000	5.85712
chr1	900000	905000	chr1:1000000-1005000	2.48031
chr1	900000	905000	chr1:940000-945000	2.50844
chr1	900000	905000	chr1:955000-960000	5.92312
chr1	900000	905000	chr1:965000-970000	2.7184
chr1	910000	915000	chr1:1270000-1275000	2.99114
chr1	910000	915000	chr1:955000-960000	3.73792
chr1	920000	925000	chr1:1000000-1005000	2.2815
chr1	920000	925000	chr1:955000-960000	2.65294
chr1	925000	930000	chr1:955000-960000	3.10078
chr1	940000	945000	chr1:900000-905000	2.50844
chr1	955000	960000	chr1:1065000-1070000	2.36704
chr1	955000	960000	chr1:900000-905000	5.92312
chr1	955000	960000	chr1:910000-915000	3.73792
chr1	955000	960000	chr1:920000-925000	2.65294
chr1	955000	960000	chr1:925000-930000	3.10078
chr1	960000	965000	chr1:1230000-1235000	4.75596
chr1	960000	965000	chr1:1270000-1275000	5.09465
chr1	960000	965000	chr1:775000-780000	2.39045
chr1	965000	970000	chr1:900000-905000	2.7184
chr1	975000	980000	chr1:1230000-1235000	2.15974
chr1	1000000	1005000	chr1:1020000-1025000	4.70962
chr1	1000000	1005000	chr1:1030000-1035000	6.59185
chr1	1000000	1005000	chr1:1060000-1065000	5.05827
chr1	1000000	1005000	chr1:1065000-1070000	3.20415
chr1	1000000	1005000	chr1:1110000-1115000	3.44598
chr1	1000000	1005000	chr1:1200000-1205000	2.03605
chr1	1000000	1005000	chr1:1230000-1235000	4.59718
chr1	1000000	1005000	chr1:1240000-1245000	2.9257
chr1	1000000	1005000	chr1:1250000-1255000	2.21381
chr1	1000000	1005000	chr1:1260000-1265000	7.83739
chr1	1000000	1005000	chr1:1270000-1275000	4.62969
chr1	1000000	1005000	chr1:1300000-1305000	7.73352
chr1	1000000	1005000	chr1:1305000-1310000	3.34595
chr1	1000000	1005000	chr1:900000-905000	2.48031
chr1	1000000	1005000	chr1:920000-925000	2.2815
chr1	1005000	1010000	chr1:1060000-1065000	3.16054
chr1	1005000	1010000	chr1:1110000-1115000	2.47667
chr1	1005000	1010000	chr1:1230000-1235000	6.66655
chr1	1005000	1010000	chr1:1250000-1255000	4.25098
chr1	1005000	1010000	chr1:1260000-1265000	2.72072
chr1	1005000	1010000	chr1:1270000-1275000	5.52669
chr1	1005000	1010000	chr1:1300000-1305000	3.51621
chr1	1005000	1010000	chr1:1305000-1310000	3.44354
chr1	1010000	1015000	chr1:1200000-1205000	3.24253
chr1	1010000	1015000	chr1:1260000-1265000	2.85254
chr1	1010000	1015000	chr1:1270000-1275000	4.59876
chr1	1010000	1015000	chr1:1305000-1310000	3.66521
chr1	1015000	1020000	chr1:1065000-1070000	2.66941
chr1	1015000	1020000	chr1:1200000-1205000	2.42777
chr1	1015000	1020000	chr1:1230000-1235000	2.57042
chr1	1015000	1020000	chr1:1270000-1275000	2.72582
chr1	1015000	1020000	chr1:1305000-1310000	2.26297
chr1	1020000	1025000	chr1:1000000-1005000	4.70962
chr1	1030000	1035000	chr1:1000000-1005000	6.59185
chr1	1030000	1035000	chr1:1200000-1205000	3.23833
chr1	1030000	1035000	chr1:1230000-1235000	2.42984
chr1	1030000	1035000	chr1:1270000-1275000	3.57859
chr1	1030000	1035000	chr1:1305000-1310000	2.31504
chr1	1055000	1060000	chr1:1230000-1235000	3.4797
chr1	1055000	1060000	chr1:1305000-1310000	3.20303
chr1	1060000	1065000	chr1:1000000-1005000	5.05827
chr1	1060000	1065000	chr1:1005000-1010000	3.16054
chr1	1060000	1065000	chr1:1230000-1235000	7.09694
chr1	1060000	1065000	chr1:1305000-1310000	3.43033
chr1	1065000	1070000	chr1:1000000-1005000	3.20415
chr1	1065000	1070000	chr1:1015000-1020000	2.66941
chr1	1065000	1070000	chr1:1230000-1235000	5.69791
chr1	1065000	1070000	chr1:955000-960000	2.36704
chr1	1100000	1105000	chr1:1200000-1205000	4.32433
chr1	1100000	1105000	chr1:1230000-1235000	4.59424
chr1	1110000	1115000	chr1:1000000-1005000	3.44598
chr1	1110000	1115000	chr1:1005000-1010000	2.47667
chr1	1110000	1115000	chr1:1200000-1205000	6.98332
chr1	1110000	1115000	chr1:1230000-1235000	18.9164
chr1	1110000	1115000	chr1:1270000-1275000	3.6729
chr1	1110000	1115000	chr1:1305000-1310000	4.03068
chr1	1115000	1120000	chr1:1200000-1205000	6.94943
chr1	1115000	1120000	chr1:1230000-1235000	8.03751
chr1	1115000	1120000	chr1:1250000-1255000	2.00084
chr1	1115000	1120000	chr1:1270000-1275000	2.25676
chr1	1120000	1125000	chr1:1200000-1205000	9.89881
chr1	1120000	1125000	chr1:1230000-1235000	5.0575
chr1	1120000	1125000	chr1:1250000-1255000	3.2181
chr1	1135000	1140000	chr1:1200000-1205000	6.44064
chr1	1135000	1140000	chr1:1205000-1210000	2.53629
chr1	1135000	1140000	chr1:1225000-1230000	4.33981
chr1	1135000	1140000	chr1:1230000-1235000	5.95401
chr1	1135000	1140000	chr1:1240000-1245000	2.20356
chr1	1135000	1140000	chr1:1250000-1255000	2.89114
chr1	1140000	1145000	chr1:1180000-1185000	3.14822
chr1	1140000	1145000	chr1:1200000-1205000	3.39259
chr1	1140000	1145000	chr1:1230000-1235000	5.73996
chr1	1145000	1150000	chr1:1200000-1205000	3.98141
chr1	1155000	1160000	chr1:1185000-1190000	8.48737
chr1	1155000	1160000	chr1:1195000-1200000	5.04612
chr1	1155000	1160000	chr1:1200000-1205000	4.78576
chr1	1155000	1160000	chr1:1205000-1210000	5.33152
chr1	1155000	1160000	chr1:1225000-1230000	4.85058
chr1	1155000	1160000	chr1:1240000-1245000	3.71232
chr1	1155000	1160000	chr1:1250000-1255000	5.01286
chr1	1155000	1160000	chr1:1260000-1265000	3.12385
chr1	1170000	1175000	chr1:1200000-1205000	4.65823
chr1	1170000	1175000	chr1:1230000-1235000	3.19715
chr1	1180000	1185000	chr1:1140000-1145000	3.14822
chr1	1180000	1185000	chr1:1200000-1205000	10.6735
chr1	1180000	1185000	chr1:1230000-1235000	2.09227
chr1	1185000	1190000	chr1:1155000-1160000	8.48737
chr1	1185000	1190000	chr1:1230000-1235000	2.8794
chr1	1195000	1200000	chr1:1155000-1160000	5.04612
chr1	1200000	1205000	chr1:1000000-1005000	2.03605
chr1	1200000	1205000	chr1:1010000-1015000	3.24253
chr1	1200000	1205000	chr1:1015000-1020000	2.42777
chr1	1200000	1205000	chr1:1030000-1035000	3.23833
chr1	1200000	1205000	chr1:1100000-1105000	4.32433
chr1	1200000	1205000	chr1:1110000-1115000	6.98332
chr1	1200000	1205000	chr1:1115000-1120000	6.94943
chr1	1200000	1205000	chr1:1120000-1125000	9.89881
chr1	1200000	1205000	chr1:1135000-1140000	6.44064
chr1	1200000	1205000	chr1:1140000-1145000	3.39259
chr1	1200000	1205000	chr1:1145000-1150000	3.98141
chr1	1200000	1205000	chr1:1155000-1160000	4.78576
chr1	1200000	1205000	chr1:1170000-1175000	4.65823
chr1	1200000	1205000	chr1:1180000-1185000	10.6735
chr1	1200000	1205000	chr1:1250000-1255000	3.56306
chr1	1205000	1210000	chr1:1135000-1140000	2.53629
chr1	1205000	1210000	chr1:1155000-1160000	5.33152
chr1	1225000	1230000	chr1:1135000-1140000	4.33981
chr1	1225000	1230000	chr1:1155000-1160000	4.85058
chr1	1230000	1235000	chr1:1000000-1005000	4.59718
chr1	1230000	1235000	chr1:1005000-1010000	6.66655
chr1	1230000	1235000	chr1:1015000-1020000	2.57042
chr1	1230000	1235000	chr1:1030000-1035000	2.42984
chr1	1230000	1235000	chr1:1055000-1060000	3.4797
chr1	1230000	1235000	chr1:1060000-1065000	7.09694
chr1	1230000	1235000	chr1:1065000-1070000	5.69791
chr1	1230000	1235000	chr1:1100000-1105000	4.59424
chr1	1230000	1235000	chr1:1110000-1115000	18.9164
chr1	1230000	1235000	chr1:1115000-1120000	8.03751
chr1	1230000	1235000	chr1:1120000-1125000	5.0575
chr1	1230000	1235000	chr1:1135000-1140000	5.95401
chr1	1230000	1235000	chr1:1140000-1145000	5.73996
chr1	1230000	1235000	chr1:1170000-1175000	3.19715
chr1	1230000	1235000	chr1:1180000-1185000	2.09227
chr1	1230000	1235000	chr1:1185000-1190000	2.8794
chr1	1230000	1235000	chr1:1260000-1265000	2.01788
chr1	1230000	1235000	chr1:960000-965000	4.75596
chr1	1230000	1235000	chr1:975000-980000	2.15974
chr1	1240000	1245000	chr1:1000000-1005000	2.9257
chr1	1240000	1245000	chr1:1135000-1140000	2.20356
chr1	1240000	1245000	chr1:1155000-1160000	3.71232
chr1	1250000	1255000	chr1:1000000-1005000	2.21381
chr1	1250000	1255000	chr1:1005000-1010000	4.25098
chr1	1250000	1255000	chr1:1115000-1120000	2.00084
chr1	1250000	1255000	chr1:1120000-1125000	3.2181
chr1	1250000	1255000	chr1:1135000-1140000	2.89114
chr1	1250000	1255000	chr1:1155000-1160000	5.01286
chr1	1250000	1255000	chr1:1200000-1205000	3.56306
chr1	1260000	1265000	chr1:1000000-1005000	7.83739
chr1	1260000	1265000	chr1:1005000-1010000	2.72072
chr1	1260000	1265000	chr1:1010000-1015000	2.85254
chr1	1260000	1265000	chr1:1155000-1160000	3.12385
chr1	1260000	1265000	chr1:1230000-1235000	2.01788
chr1	1270000	1275000	chr1:1000000-1005000	4.62969
chr1	1270000	1275000	chr1:1005000-1010000	5.52669
chr1	1270000	1275000	chr1:1010000-1015000	4.59876
chr1	1270000	1275000	chr1:1015000-1020000	2.72582
chr1	1270000	1275000	chr1:1030000-1035000	3.57859
chr1	1270000	1275000	chr1:1110000-1115000	3.6729
chr1	1270000	1275000	chr1:1115000-1120000	2.25676
chr1	1270000	1275000	chr1:1300000-1305000	2.15183
chr1	1270000	1275000	chr1:910000-915000	2.99114
chr1	1270000	1275000	chr1:960000-965000	5.09465
chr1	1300000	1305000	chr1:1000000-1005000	7.73352
chr1	1300000	1305000	chr1:1005000-1010000	3.51621
chr1	1300000	1305000	chr1:1270000-1275000	2.15183
chr1	1305000	1310000	chr1:1000000-1005000	3.34595
chr1	1305000	1310000	chr1:1005000-1010000	3.44354
chr1	1305000	1310000	chr1:1010000-1015000	3.66521
chr1	1305000	1310000	chr1:1015000-1020000	2.26297
chr1	1305000	1310000	chr1:1030000-1035000	2.31504
chr1	1305000	1310000	chr1:1055000-1060000	3.20303
chr1	1305000	1310000	chr1:1060000-1065000	3.43033
chr1	1305000	1310000	chr1:1110000-1115000	4.03068
chr1	1305000	1310000	chr1:1500000-1505000	2.52674
chr1	1305000	1310000	chr1:1510000-1515000	4.36958
chr1	1325000	1330000	chr1:1510000-1515000	3.14147
chr1	1335000	1340000	chr1:1355000-1360000	5.55086
chr1	1335000	1340000	chr1:1505000-1510000	3.5914
chr1	1335000	1340000	chr1:1510000-1515000	2.29666
chr1	1345000	1350000	chr1:1510000-1515000	5.82993
chr1	1355000	1360000	chr1:1335000-1340000	5.55086
chr1	1355000	1360000	chr1:1470000-1475000	5.22022
chr1	1355000	1360000	chr1:1480000-1485000	2.1902
chr1	1355000	1360000	chr1:1490000-1495000	7.62538
chr1	1355000	1360000	chr1:1500000-1505000	5.07847
chr1	1355000	1360000	chr1:1505000-1510000	14.8951
chr1	1355000	1360000	chr1:1510000-1515000	9.98676
chr1	1355000	1360000	chr1:1550000-1555000	2.17456
chr1	1365000	1370000	chr1:1510000-1515000	3.54822
chr1	1370000	1375000	chr1:1470000-1475000	4.04159
chr1	1370000	1375000	chr1:1510000-1515000	5.91357
chr1	1375000	1380000	chr1:1470000-1475000	3.1246
chr1	1375000	1380000	chr1:1505000-1510000	2.97127
chr1	1375000	1380000	chr1:1510000-1515000	6.20693
chr1	1395000	1400000	chr1:1430000-1435000	6.27162
chr1	1395000	1400000	chr1:1435000-1440000	16.7316
chr1	1395000	1400000	chr1:1440000-1445000	2.52008
chr1	1395000	1400000	chr1:1445000-1450000	2.42948
chr1	1395000	1400000	chr1:1455000-1460000	5.80922
chr1	1395000	1400000	chr1:1470000-1475000	10.9523
chr1	1395000	1400000	chr1:1480000-1485000	6.95322
chr1	1395000	1400000	chr1:1490000-1495000	8.07375
chr1	1395000	1400000	chr1:1500000-1505000	14.1569
chr1	1395000	1400000	chr1:1505000-1510000	10.8275
chr1	1395000	1400000	chr1:1510000-1515000	6.4018
chr1	1395000	1400000	chr1:1515000-1520000	3.26163
chr1	1400000	1405000	chr1:1430000-1435000	14.9723
chr1	1400000	1405000	chr1:1435000-1440000	3.62532
chr1	1400000	1405000	chr1:1440000-1445000	2.10205
chr1	1400000	1405000	chr1:1470000-1475000	5.59631
chr1	1400000	1405000	chr1:1505000-1510000	2.56388
chr1	1400000	1405000	chr1:1510000-1515000	5.61539
chr1	1405000	1410000	chr1:1430000-1435000	23.135
chr1	1405000	1410000	chr1:1435000-1440000	12.5788
chr1	1405000	1410000	chr1:1440000-1445000	7.75459
chr1	1405000	1410000	chr1:1445000-1450000	2.45537
chr1	1405000	1410000	chr1:1470000-1475000	6.21284
chr1	1405000	1410000	chr1:1480000-1485000	2.04575
chr1	1405000	1410000	chr1:1505000-1510000	5.71239
chr1	1405000	1410000	chr1:1510000-1515000	3.90016
chr1	1430000	1435000	chr1:1395000-1400000	6.27162
chr1	1430000	1435000	chr1:1400000-1405000	14.9723
chr1	1430000	1435000	chr1:1405000-1410000	23.135
chr1	1430000	1435000	chr1:1470000-1475000	6.25102
chr1	1430000	1435000	chr1:1500000-1505000	4.32549
chr1	1435000	1440000	chr1:1395000-1400000	16.7316
chr1	1435000	1440000	chr1:1400000-1405000	3.62532
chr1	1435000	1440000	chr1:1405000-1410000	12.5788
chr1	1440000	1445000	chr1:1395000-1400000	2.52008
chr1	1440000	1445000	chr1:1400000-1405000	2.10205
chr1	1440000	1445000	chr1:1405000-1410000	7.75459
chr1	1445000	1450000	chr1:1395000-1400000	2.42948
chr1	1445000	1450000	chr1:1405000-1410000	2.45537
chr1	1455000	1460000	chr1:1395000-1400000	5.80922
chr1	1470000	1475000	chr1:1355000-1360000	5.22022
chr1	1470000	1475000	chr1:1370000-1375000	4.04159
chr1	1470000	1475000	chr1:1375000-1380000	3.1246
chr1	1470000	1475000	chr1:1395000-1400000	10.9523
chr1	1470000	1475000	chr1:1400000-1405000	5.59631
chr1	1470000	1475000	chr1:1405000-1410000	6.21284
chr1	1470000	1475000	chr1:1430000-1435000	6.25102
chr1	1480000	1485000	chr1:1355000-1360000	2.1902
chr1	1480000	1485000	chr1:1395000-1400000	6.95322
chr1	1480000	1485000	chr1:1405000-1410000	2.04575
chr1	1490000	1495000	chr1:1355000-1360000	7.62538
chr1	1490000	1495000	chr1:1395000-1400000	8.07375
chr1	1500000	1505000	chr1:1305000-1310000	2.52674
chr1	1500000	1505000	chr1:1355000-1360000	5.07847
chr1	1500000	1505000	chr1:1395000-1400000	14.1569
chr1	1500000	1505000	chr1:1430000-1435000	4.32549
chr1	1505000	1510000	chr1:1335000-1340000	3.5914
chr1	1505000	1510000	chr1:1355000-1360000	14.8951
chr1	1505000	1510000	chr1:1375000-1380000	2.97127
chr1	1505000	1510000	chr1:1395000-1400000	10.8275
chr1	1505000	1510000	chr1:1400000-1405000	2.56388
chr1	1505000	1510000	chr1:1405000-1410000	5.71239
chr1	1510000	1515000	chr1:1305000-1310000	4.36958
chr1	1510000	1515000	chr1:1325000-1330000	3.14147
chr1	1510000	1515000	chr1:1335000-1340000	2.29666
chr1	1510000	1515000	chr1:1345000-1350000	5.82993
chr1	1510000	1515000	chr1:1355000-1360000	9.98676
chr1	1510000	1515000	chr1:1365000-1370000	3.54822
chr1	1510000	1515000	chr1:1370000-1375000	5.91357
chr1	1510000	1515000	chr1:1375000-1380000	6.20693
chr1	1510000	1515000	chr1:1395000-1400000	6.4018
chr1	1510000	1515000	chr1:1400000-1405000	5.61539
chr1	1510000	1515000	chr1:1405000-1410000	3.90016
chr1	1510000	1515000	chr1:1530000-1535000	2.81679
chr1	1510000	1515000	chr1:1550000-1555000	3.3742
chr1	1510000	1515000	chr1:1655000-1660000	2.24829
chr1	1510000	1515000	chr1:1685000-1690000	3.85486
chr1	1515000	1520000	chr1:1395000-1400000	3.26163
chr1	1530000	1535000	chr1:1510000-1515000	2.81679
chr1	1550000	1555000	chr1:1355000-1360000	2.17456
chr1	1550000	1555000	chr1:1510000-1515000	3.3742
chr1	1570000	1575000	chr1:1610000-1615000	8.70546
chr1	1570000	1575000	chr1:1620000-1625000	4.93653
chr1	1570000	1575000	chr1:1655000-1660000	3.56164
chr1	1570000	1575000	chr1:1685000-1690000	2.72379
chr1	1570000	1575000	chr1:1745000-1750000	2.27178
chr1	1570000	1575000	chr1:1905000-1910000	3.49936
chr1	1575000	1580000	chr1:1610000-1615000	11.4054
chr1	1575000	1580000	chr1:1655000-1660000	3.7067
chr1	1575000	1580000	chr1:1685000-1690000	4.227
chr1	1575000	1580000	chr1:1905000-1910000	3.51731
chr1	1585000	1590000	chr1:1610000-1615000	2.19819
chr1	1590000	1595000	chr1:1610000-1615000	2.48215
chr1	1610000	1615000	chr1:1570000-1575000	8.70546
chr1	1610000	1615000	chr1:1575000-1580000	11.4054
chr1	1610000	1615000	chr1:1585000-1590000	2.19819
chr1	1610000	1615000	chr1:1590000-1595000	2.48215
chr1	1620000	1625000	chr1:1570000-1575000	4.93653
chr1	1635000	1640000	chr1:1745000-1750000	2.10009
chr1	1655000	1660000	chr1:1510000-1515000	2.24829
chr1	1655000	1660000	chr1:1570000-1575000	3.56164
chr1	1655000	1660000	chr1:1575000-1580000	3.7067
chr1	1655000	1660000	chr1:1720000-1725000	3.85815
chr1	1655000	1660000	chr1:1745000-1750000	2.02512
chr1	1655000	1660000	chr1:1905000-1910000	2.17243
chr1	1660000	1665000	chr1:1725000-1730000	5.51475
chr1	1665000	1670000	chr1:1730000-1735000	3.43831
chr1	1665000	1670000	chr1:1745000-1750000	2.70571
chr1	1675000	1680000	chr1:1745000-1750000	4.06404
chr1	1685000	1690000	chr1:1510000-1515000	3.85486
chr1	1685000	1690000	chr1:1570000-1575000	2.72379
chr1	1685000	1690000	chr1:1575000-1580000	4.227
chr1	1685000	1690000	chr1:1740000-1745000	2.29782
chr1	1685000	1690000	chr1:1745000-1750000	25.8123
chr1	1690000	1695000	chr1:1730000-1735000	2.06382
chr1	1690000	1695000	chr1:1740000-1745000	10.8968
chr1	1690000	1695000	chr1:1745000-1750000	19.0356
chr1	1690000	1695000	chr1:1755000-1760000	4.81834
chr1	1690000	1695000	chr1:1905000-1910000	2.10287
chr1	1720000	1725000	chr1:1655000-1660000	3.85815
chr1	1725000	1730000	chr1:1660000-1665000	5.51475
chr1	1730000	1735000	chr1:1665000-1670000	3.43831
chr1	1730000	1735000	chr1:1690000-1695000	2.06382
chr1	1730000	1735000	chr1:1905000-1910000	8.28551
chr1	1740000	1745000	chr1:1685000-1690000	2.29782
chr1	1740000	1745000	chr1:1690000-1695000	10.8968
chr1	1745000	1750000	chr1:1570000-1575000	2.27178
chr1	1745000	1750000	chr1:1635000-1640000	2.10009
chr1	1745000	1750000	chr1:1655000-1660000	2.02512
chr1	1745000	1750000	chr1:1665000-1670000	2.70571
chr1	1745000	1750000	chr1:1675000-1680000	4.06404
chr1	1745000	1750000	chr1:1685000-1690000	25.8123
chr1	1745000	1750000	chr1:1690000-1695000	19.0356
chr1	1755000	1760000	chr1:1690000-1695000	4.81834
chr1	1755000	1760000	chr1:1775000-1780000	2.00395
chr1	1755000	1760000	chr1:1905000-1910000	8.02424
chr1	1775000	1780000	chr1:1755000-1760000	2.00395
chr1	1775000	1780000	chr1:1855000-1860000	5.13723
chr1	1775000	1780000	chr1:1880000-1885000	13.916
chr1	1775000	1780000	chr1:1885000-1890000	7.57995
chr1	1775000	1780000	chr1:1890000-1895000	6.32856
chr1	1775000	1780000	chr1:1905000-1910000	25.9048
chr1	1775000	1780000	chr1:1910000-1915000	6.84373
chr1	1780000	1785000	chr1:1880000-1885000	3.91585
chr1	1780000	1785000	chr1:1885000-1890000	6.51737
chr1	1780000	1785000	chr1:1905000-1910000	31.7489
chr1	1795000	1800000	chr1:1905000-1910000	6.95097
chr1	1820000	1825000	chr1:1885000-1890000	3.58918
chr1	1820000	1825000	chr1:1905000-1910000	4.50022
chr1	1830000	1835000	chr1:1905000-1910000	9.35149
chr1	1840000	1845000	chr1:1905000-1910000	3.52612
chr1	1845000	1850000	chr1:1880000-1885000	4.55318
chr1	1845000	1850000	chr1:1905000-1910000	4.67959
chr1	1855000	1860000	chr1:1775000-1780000	5.13723
chr1	1855000	1860000	chr1:1885000-1890000	3.97642
chr1	1880000	1885000	chr1:1775000-1780000	13.916
chr1	1880000	1885000	chr1:1780000-1785000	3.91585
chr1	1880000	1885000	chr1:1845000-1850000	4.55318
chr1	1885000	1890000	chr1:1775000-1780000	7.57995
chr1	1885000	1890000	chr1:1780000-1785000	6.51737
chr1	1885000	1890000	chr1:1820000-1825000	3.58918
chr1	1885000	1890000	chr1:1855000-1860000	3.97642
chr1	1890000	1895000	chr1:1775000-1780000	6.32856
chr1	1905000	1910000	chr1:1570000-1575000	3.49936
chr1	1905000	1910000	chr1:1575000-1580000	3.51731
chr1	1905000	1910000	chr1:1655000-1660000	2.17243
chr1	1905000	1910000	chr1:1690000-1695000	2.10287
chr1	1905000	1910000	chr1:1730000-1735000	8.28551
chr1	1905000	1910000	chr1:1755000-1760000	8.02424
chr1	1905000	1910000	chr1:1775000-1780000	25.9048
chr1	1905000	1910000	chr1:1780000-1785000	31.7489
chr1	1905000	1910000	chr1:1795000-1800000	6.95097
chr1	1905000	1910000	chr1:1820000-1825000	4.50022
chr1	1905000	1910000	chr1:1830000-1835000	9.35149
chr1	1905000	1910000	chr1:1840000-1845000	3.52612
chr1	1905000	1910000	chr1:1845000-1850000	4.67959
chr1	1910000	1915000	chr1:1775000-1780000	6.84373
chr1	1910000	1915000	chr1:2195000-2200000	3.24717
chr1	1955000	1960000	chr1:2045000-2050000	2.12016
chr1	2045000	2050000	chr1:1955000-1960000	2.12016
chr1	2135000	2140000	chr1:2195000-2200000	2.18745
chr1	2135000	2140000	chr1:2390000-2395000	3.8628
chr1	2170000	2175000	chr1:2410000-2415000	2.68569
chr1	2175000	2180000	chr1:2195000-2200000	2.07008
chr1	2175000	2180000	chr1:2375000-2380000	3.76365
chr1	2175000	2180000	chr1:2390000-2395000	7.39099
chr1	2175000	2180000	chr1:2395000-2400000	2.1926
chr1	2175000	2180000	chr1:2410000-2415000	3.72263
chr1	2185000	2190000	chr1:2390000-2395000	5.38035
chr1	2185000	2190000	chr1:2395000-2400000	2.62745
chr1	2185000	2190000	chr1:2410000-2415000	5.89786
chr1	2190000	2195000	chr1:2315000-2320000	7.341
chr1	2190000	2195000	chr1:2375000-2380000	12.4367
chr1	2190000	2195000	chr1:2390000-2395000	29.0702
chr1	2190000	2195000	chr1:2395000-2400000	18.1976
chr1	2190000	2195000	chr1:2410000-2415000	31.8839
chr1	2190000	2195000	chr1:2540000-2545000	2.81915
chr1	2190000	2195000	chr1:2545000-2550000	4.88245
chr1	2195000	2200000	chr1:1910000-1915000	3.24717
chr1	2195000	2200000	chr1:2135000-2140000	2.18745
chr1	2195000	2200000	chr1:2175000-2180000	2.07008
chr1	2195000	2200000	chr1:2220000-2225000	13.9374
chr1	2195000	2200000	chr1:2225000-2230000	5.21318
chr1	2195000	2200000	chr1:2230000-2235000	19.8754
chr1	2195000	2200000	chr1:2245000-2250000	3.85068
chr1	2195000	2200000	chr1:2255000-2260000	7.16331
chr1	2195000	2200000	chr1:2265000-2270000	4.46812
chr1	2195000	2200000	chr1:2275000-2280000	5.27035
chr1	2195000	2200000	chr1:2280000-2285000	6.01071
chr1	2195000	2200000	chr1:2285000-2290000	5.40613
chr1	2195000	2200000	chr1:2290000-2295000	4.20037
chr1	2195000	2200000	chr1:2310000-2315000	10.1305
chr1	2195000	2200000	chr1:2315000-2320000	9.10419
chr1	2195000	2200000	chr1:2340000-2345000	6.70015
chr1	2195000	2200000	chr1:2355000-2360000	8.30004
chr1	2195000	2200000	chr1:2370000-2375000	5.55209
chr1	2195000	2200000	chr1:2375000-2380000	57.0314
chr1	2195000	2200000	chr1:2380000-2385000	9.46746
chr1	2195000	2200000	chr1:2385000-2390000	7.62315
chr1	2195000	2200000	chr1:2390000-2395000	54.1939
chr1	2195000	2200000	chr1:2395000-2400000	39.5244
chr1	2195000	2200000	chr1:2410000-2415000	39.4465
chr1	2195000	2200000	chr1:2525000-2530000	5.88518
chr1	2195000	2200000	chr1:2540000-2545000	17.1867
chr1	2195000	2200000	chr1:2545000-2550000	10.9527
chr1	2195000	2200000	chr1:2560000-2565000	3.18041
chr1	2195000	2200000	chr1:2580000-2585000	5.93137
chr1	2195000	2200000	chr1:2585000-2590000	7.69031
chr1	2200000	2205000	chr1:2375000-2380000	3.25034
chr1	2200000	2205000	chr1:2390000-2395000	2.04099
chr1	2200000	2205000	chr1:2410000-2415000	4.46616
chr1	2205000	2210000	chr1:2390000-2395000	3.10987
chr1	2220000	2225000	chr1:2195000-2200000	13.9374
chr1	2220000	2225000	chr1:2410000-2415000	5.14295
chr1	2225000	2230000	chr1:2195000-2200000	5.21318
chr1	2225000	2230000	chr1:2390000-2395000	2.73435
chr1	2230000	2235000	chr1:2195000-2200000	19.8754
chr1	2230000	2235000	chr1:2255000-2260000	2.1611
chr1	2245000	2250000	chr1:2195000-2200000	3.85068
chr1	2255000	2260000	chr1:2195000-2200000	7.16331
chr1	2255000	2260000	chr1:2230000-2235000	2.1611
chr1	2255000	2260000	chr1:2315000-2320000	2.09975
chr1	2255000	2260000	chr1:2390000-2395000	3.81667
chr1	2265000	2270000	chr1:2195000-2200000	4.46812
chr1	2275000	2280000	chr1:2195000-2200000	5.27035
chr1	2280000	2285000	chr1:2195000-2200000	6.01071
chr1	2285000	2290000	chr1:2195000-2200000	5.40613
chr1	2290000	2295000	chr1:2195000-2200000	4.20037
chr1	2310000	2315000	chr1:2195000-2200000	10.1305
chr1	2315000	2320000	chr1:2190000-2195000	7.341
chr1	2315000	2320000	chr1:2195000-2200000	9.10419
chr1	2315000	2320000	chr1:2255000-2260000	2.09975
chr1	2340000	2345000	chr1:2195000-2200000	6.70015
chr1	2355000	2360000	chr1:2195000-2200000	8.30004
chr1	2370000	2375000	chr1:2195000-2200000	5.55209
chr1	2375000	2380000	chr1:2175000-2180000	3.76365
chr1	2375000	2380000	chr1:2190000-2195000	12.4367
chr1	2375000	2380000	chr1:2195000-2200000	57.0314
chr1	2375000	2380000	chr1:2200000-2205000	3.25034
chr1	2380000	2385000	chr1:2195000-2200000	9.46746
chr1	2385000	2390000	chr1:2195000-2200000	7.62315
chr1	2390000	2395000	chr1:2135000-2140000	3.8628
chr1	2390000	2395000	chr1:2175000-2180000	7.39099
chr1	2390000	2395000	chr1:2185000-2190000	5.38035
chr1	2390000	2395000	chr1:2190000-2195000	29.0702
chr1	2390000	2395000	chr1:2195000-2200000	54.1939
chr1	2390000	2395000	chr1:2200000-2205000	2.04099
chr1	2390000	2395000	chr1:2205000-2210000	3.10987
chr1	2390000	2395000	chr1:2225000-2230000	2.73435
chr1	2390000	2395000	chr1:2255000-2260000	3.81667
chr1	2390000	2395000	chr1:2410000-2415000	11.7589
chr1	2390000	2395000	chr1:2540000-2545000	4.89106
chr1	2395000	2400000	chr1:2175000-2180000	2.1926
chr1	2395000	2400000	chr1:2185000-2190000	2.62745
chr1	2395000	2400000	chr1:2190000-2195000	18.1976
chr1	2395000	2400000	chr1:2195000-2200000	39.5244
chr1	2395000	2400000	chr1:2540000-2545000	2.26114
chr1	2395000	2400000	chr1:2545000-2550000	3.80045
chr1	2395000	2400000	chr1:2585000-2590000	3.32535
chr1	2410000	2415000	chr1:2170000-2175000	2.68569
chr1	2410000	2415000	chr1:2175000-2180000	3.72263
chr1	2410000	2415000	chr1:2185000-2190000	5.89786
chr1	2410000	2415000	chr1:2190000-2195000	31.8839
chr1	2410000	2415000	chr1:2195000-2200000	39.4465
chr1	2410000	2415000	chr1:2200000-2205000	4.46616
chr1	2410000	2415000	chr1:2220000-2225000	5.14295
chr1	2410000	2415000	chr1:2390000-2395000	11.7589
chr1	2410000	2415000	chr1:2525000-2530000	20.3273
chr1	2410000	2415000	chr1:2540000-2545000	52.6124
chr1	2410000	2415000	chr1:2545000-2550000	39.4436
chr1	2410000	2415000	chr1:2560000-2565000	10.2632
chr1	2410000	2415000	chr1:2570000-2575000	6.80539
chr1	2410000	2415000	chr1:2575000-2580000	3.187
chr1	2410000	2415000	chr1:2580000-2585000	22.4041
chr1	2410000	2415000	chr1:2585000-2590000	15.2177
chr1	2410000	2415000	chr1:2590000-2595000	2.98256
chr1	2410000	2415000	chr1:2595000-2600000	8.50406
chr1	2410000	2415000	chr1:2640000-2645000	4.88079
chr1	2425000	2430000	chr1:2545000-2550000	2.62865
chr1	2525000	2530000	chr1:2195000-2200000	5.88518
chr1	2525000	2530000	chr1:2410000-2415000	20.3273
chr1	2540000	2545000	chr1:2190000-2195000	2.81915
chr1	2540000	2545000	chr1:2195000-2200000	17.1867
chr1	2540000	2545000	chr1:2390000-2395000	4.89106
chr1	2540000	2545000	chr1:2395000-2400000	2.26114
chr1	2540000	2545000	chr1:2410000-2415000	52.6124
chr1	2545000	2550000	chr1:2190000-2195000	4.88245
chr1	2545000	2550000	chr1:2195000-2200000	10.9527
chr1	2545000	2550000	chr1:2395000-2400000	3.80045
chr1	2545000	2550000	chr1:2410000-2415000	39.4436
chr1	2545000	2550000	chr1:2425000-2430000	2.62865
chr1	2545000	2550000	chr1:2580000-2585000	2.90439
chr1	2545000	2550000	chr1:2590000-2595000	2.15671
chr1	2545000	2550000	chr1:2595000-2600000	2.41693
chr1	2560000	2565000	chr1:2195000-2200000	3.18041
chr1	2560000	2565000	chr1:2410000-2415000	10.2632
chr1	2570000	2575000	chr1:2410000-2415000	6.80539
chr1	2575000	2580000	chr1:2410000-2415000	3.187
chr1	2580000	2585000	chr1:2195000-2200000	5.93137
chr1	2580000	2585000	chr1:2410000-2415000	22.4041
chr1	2580000	2585000	chr1:2545000-2550000	2.90439
chr1	2585000	2590000	chr1:2195000-2200000	7.69031
chr1	2585000	2590000	chr1:2395000-2400000	3.32535
chr1	2585000	2590000	chr1:2410000-2415000	15.2177
chr1	2585000	2590000	chr1:2640000-2645000	10.4161
chr1	2590000	2595000	chr1:2410000-2415000	2.98256
chr1	2590000	2595000	chr1:2545000-2550000	2.15671
chr1	2595000	2600000	chr1:2410000-2415000	8.50406
chr1	2595000	2600000	chr1:2545000-2550000	2.41693
chr1	2640000	2645000	chr1:2410000-2415000	4.88079
chr1	2640000	2645000	chr1:2585000-2590000	10.4161
chr1	3620000	3625000	chr1:3650000-3655000	2.63539
chr1	3625000	3630000	chr1:3645000-3650000	4.91118
chr1	3625000	3630000	chr1:3795000-3800000	7.857
chr1	3630000	3635000	chr1:3650000-3655000	5.87837
chr1	3645000	3650000	chr1:3625000-3630000	4.91118
chr1	3645000	3650000	chr1:3795000-3800000	2.00518
chr1	3650000	3655000	chr1:3620000-3625000	2.63539
chr1	3650000	3655000	chr1:3630000-3635000	5.87837
chr1	3650000	3655000	chr1:3680000-3685000	2.12363
chr1	3650000	3655000	chr1:3770000-3775000	10.2335
chr1	3650000	3655000	chr1:3795000-3800000	7.4714
chr1	3650000	3655000	chr1:3880000-3885000	2.13775
chr1	3680000	3685000	chr1:3650000-3655000	2.12363
chr1	3725000	3730000	chr1:3795000-3800000	2.9152
chr1	3745000	3750000	chr1:3770000-3775000	4.69771
chr1	3745000	3750000	chr1:3775000-3780000	7.50194
chr1	3745000	3750000	chr1:3795000-3800000	3.23919
chr1	3770000	3775000	chr1:3650000-3655000	10.2335
chr1	3770000	3775000	chr1:3745000-3750000	4.69771
chr1	3770000	3775000	chr1:3795000-3800000	2.89053
chr1	3775000	3780000	chr1:3745000-3750000	7.50194
chr1	3775000	3780000	chr1:3795000-3800000	6.41487
chr1	3795000	3800000	chr1:3625000-3630000	7.857
chr1	3795000	3800000	chr1:3645000-3650000	2.00518
chr1	3795000	3800000	chr1:3650000-3655000	7.4714
chr1	3795000	3800000	chr1:3725000-3730000	2.9152
chr1	3795000	3800000	chr1:3745000-3750000	3.23919
chr1	3795000	3800000	chr1:3770000-3775000	2.89053
chr1	3795000	3800000	chr1:3775000-3780000	6.41487
chr1	3855000	3860000	chr1:3895000-3900000	5.04554
chr1	3855000	3860000	chr1:3900000-3905000	2.78716
chr1	3865000	3870000	chr1:3895000-3900000	3.47639
chr1	3870000	3875000	chr1:3895000-3900000	2.79612
chr1	3880000	3885000	chr1:3650000-3655000	2.13775
chr1	3895000	3900000	chr1:3855000-3860000	5.04554
chr1	3895000	3900000	chr1:3865000-3870000	3.47639
chr1	3895000	3900000	chr1:3870000-3875000	2.79612
chr1	3900000	3905000	chr1:3855000-3860000	2.78716
chr1	6000000	6005000	chr1:6200000-6205000	2.55841
chr1	6145000	6150000	chr1:6205000-6210000	2.06424
chr1	6195000	6200000	chr1:6230000-6235000	2.92188
chr1	6195000	6200000	chr1:6390000-6395000	2.09053
chr1	6195000	6200000	chr1:6410000-6415000	2.08284
chr1	6200000	6205000	chr1:6000000-6005000	2.55841
chr1	6200000	6205000	chr1:6230000-6235000	4.91135
chr1	6205000	6210000	chr1:6145000-6150000	2.06424
chr1	6205000	6210000	chr1:6230000-6235000	9.9231
chr1	6230000	6235000	chr1:6195000-6200000	2.92188
chr1	6230000	6235000	chr1:6200000-6205000	4.91135
chr1	6230000	6235000	chr1:6205000-6210000	9.9231
chr1	6235000	6240000	chr1:6390000-6395000	3.20604
chr1	6245000	6250000	chr1:6390000-6395000	4.89735
chr1	6250000	6255000	chr1:6315000-6320000	3.69171
chr1	6250000	6255000	chr1:6390000-6395000	2.90438
chr1	6265000	6270000	chr1:6390000-6395000	2.78442
chr1	6315000	6320000	chr1:6250000-6255000	3.69171
chr1	6355000	6360000	chr1:6390000-6395000	5.29646
chr1	6355000	6360000	chr1:6410000-6415000	3.64808
chr1	6365000	6370000	chr1:6390000-6395000	6.66739
chr1	6370000	6375000	chr1:6390000-6395000	9.7491
chr1	6390000	6395000	chr1:6195000-6200000	2.09053
chr1	6390000	6395000	chr1:6235000-6240000	3.20604
chr1	6390000	6395000	chr1:6245000-6250000	4.89735
chr1	6390000	6395000	chr1:6250000-6255000	2.90438
chr1	6390000	6395000	chr1:6265000-6270000	2.78442
chr1	6390000	6395000	chr1:6355000-6360000	5.29646
chr1	6390000	6395000	chr1:6365000-6370000	6.66739
chr1	6390000	6395000	chr1:6370000-6375000	9.7491
chr1	6390000	6395000	chr1:6410000-6415000	4.58211
chr1	6410000	6415000	chr1:6195000-6200000	2.08284
chr1	6410000	6415000	chr1:6355000-6360000	3.64808
chr1	6410000	6415000	chr1:6390000-6395000	4.58211
chr1	6475000	6480000	chr1:6700000-6705000	2.53609
chr1	6550000	6555000	chr1:6575000-6580000	2.24908
chr1	6550000	6555000	chr1:6580000-6585000	8.24599
chr1	6550000	6555000	chr1:6585000-6590000	3.17683
chr1	6555000	6560000	chr1:6580000-6585000	5.6883
chr1	6575000	6580000	chr1:6550000-6555000	2.24908
chr1	6580000	6585000	chr1:6550000-6555000	8.24599
chr1	6580000	6585000	chr1:6555000-6560000	5.6883
chr1	6585000	6590000	chr1:6550000-6555000	3.17683
chr1	6700000	6705000	chr1:6475000-6480000	2.53609
chr1	6700000	6705000	chr1:6780000-6785000	3.9739
chr1	6700000	6705000	chr1:6835000-6840000	3.56705
chr1	6700000	6705000	chr1:6865000-6870000	3.35428
chr1	6700000	6705000	chr1:6910000-6915000	9.05486
chr1	6700000	6705000	chr1:7070000-7075000	3.44658
chr1	6700000	6705000	chr1:7770000-7775000	7.30176
chr1	6780000	6785000	chr1:6700000-6705000	3.9739
chr1	6800000	6805000	chr1:6910000-6915000	3.19216
chr1	6835000	6840000	chr1:6700000-6705000	3.56705
chr1	6865000	6870000	chr1:6700000-6705000	3.35428
chr1	6910000	6915000	chr1:6700000-6705000	9.05486
chr1	6910000	6915000	chr1:6800000-6805000	3.19216
chr1	7070000	7075000	chr1:6700000-6705000	3.44658
chr1	7770000	7775000	chr1:6700000-6705000	7.30176
chr1	7770000	7775000	chr1:7900000-7905000	2.46108
chr1	7770000	7775000	chr1:7950000-7955000	6.12882
chr1	7770000	7775000	chr1:7955000-7960000	7.19025
chr1	7770000	7775000	chr1:7960000-7965000	10.9315
chr1	7770000	7775000	chr1:7985000-7990000	2.10903
chr1	7785000	7790000	chr1:7950000-7955000	4.5754
chr1	7825000	7830000	chr1:7845000-7850000	8.46995
chr1	7825000	7830000	chr1:7850000-7855000	2.59293
chr1	7825000	7830000	chr1:7860000-7865000	6.7171
chr1	7825000	7830000	chr1:7895000-7900000	3.71476
chr1	7825000	7830000	chr1:7900000-7905000	5.30976
chr1	7825000	7830000	chr1:7910000-7915000	6.03998
chr1	7845000	7850000	chr1:7825000-7830000	8.46995
chr1	7850000	7855000	chr1:7825000-7830000	2.59293
chr1	7860000	7865000	chr1:7825000-7830000	6.7171
chr1	7895000	7900000	chr1:7825000-7830000	3.71476
chr1	7900000	7905000	chr1:7770000-7775000	2.46108
chr1	7900000	7905000	chr1:7825000-7830000	5.30976
chr1	7910000	7915000	chr1:7825000-7830000	6.03998
chr1	7950000	7955000	chr1:7770000-7775000	6.12882
chr1	7950000	7955000	chr1:7785000-7790000	4.5754
chr1	7950000	7955000	chr1:8365000-8370000	2.49232
chr1	7950000	7955000	chr1:8875000-8880000	2.73634
chr1	7955000	7960000	chr1:7770000-7775000	7.19025
chr1	7960000	7965000	chr1:7770000-7775000	10.9315
chr1	7960000	7965000	chr1:8345000-8350000	3.82609
chr1	7960000	7965000	chr1:8875000-8880000	5.13084
chr1	7970000	7975000	chr1:8875000-8880000	2.67818
chr1	7985000	7990000	chr1:7770000-7775000	2.10903
chr1	7985000	7990000	chr1:8875000-8880000	3.59661
chr1	8000000	8005000	chr1:8195000-8200000	2.44008
chr1	8195000	8200000	chr1:8000000-8005000	2.44008
chr1	8195000	8200000	chr1:8875000-8880000	3.39182
chr1	8345000	8350000	chr1:7960000-7965000	3.82609
chr1	8365000	8370000	chr1:7950000-7955000	2.49232
chr1	8365000	8370000	chr1:8525000-8530000	2.98086
chr1	8365000	8370000	chr1:8875000-8880000	4.42546
chr1	8370000	8375000	chr1:8875000-8880000	3.18349
chr1	8375000	8380000	chr1:8875000-8880000	2.36264
chr1	8380000	8385000	chr1:8875000-8880000	2.01209
chr1	8385000	8390000	chr1:8875000-8880000	3.83023
chr1	8390000	8395000	chr1:8815000-8820000	7.95135
chr1	8390000	8395000	chr1:8875000-8880000	8.62259
chr1	8405000	8410000	chr1:8520000-8525000	3.842
chr1	8405000	8410000	chr1:8525000-8530000	4.77947
chr1	8405000	8410000	chr1:8875000-8880000	6.18469
chr1	8410000	8415000	chr1:8700000-8705000	2.36575
chr1	8410000	8415000	chr1:8875000-8880000	7.06291
chr1	8420000	8425000	chr1:8525000-8530000	2.7957
chr1	8420000	8425000	chr1:8700000-8705000	5.13014
chr1	8420000	8425000	chr1:8815000-8820000	5.66883
chr1	8420000	8425000	chr1:8875000-8880000	6.89733
chr1	8425000	8430000	chr1:8490000-8495000	2.74231
chr1	8425000	8430000	chr1:8520000-8525000	2.89574
chr1	8425000	8430000	chr1:8700000-8705000	2.66637
chr1	8425000	8430000	chr1:8710000-8715000	3.64316
chr1	8425000	8430000	chr1:8815000-8820000	3.10404
chr1	8425000	8430000	chr1:8875000-8880000	7.2306
chr1	8435000	8440000	chr1:8875000-8880000	2.38432
chr1	8440000	8445000	chr1:8875000-8880000	2.51638
chr1	8460000	8465000	chr1:8700000-8705000	2.08402
chr1	8460000	8465000	chr1:8875000-8880000	3.57079
chr1	8490000	8495000	chr1:8425000-8430000	2.74231
chr1	8505000	8510000	chr1:8875000-8880000	5.02075
chr1	8515000	8520000	chr1:8725000-8730000	2.71962
chr1	8515000	8520000	chr1:8815000-8820000	5.49624
chr1	8515000	8520000	chr1:8825000-8830000	5.45021
chr1	8515000	8520000	chr1:8875000-8880000	5.72429
chr1	8520000	8525000	chr1:8405000-8410000	3.842
chr1	8520000	8525000	chr1:8425000-8430000	2.89574
chr1	8520000	8525000	chr1:8815000-8820000	5.13575
chr1	8520000	8525000	chr1:8875000-8880000	12.6707
chr1	8525000	8530000	chr1:8365000-8370000	2.98086
chr1	8525000	8530000	chr1:8405000-8410000	4.77947
chr1	8525000	8530000	chr1:8420000-8425000	2.7957
chr1	8525000	8530000	chr1:8700000-8705000	2.1054
chr1	8525000	8530000	chr1:8815000-8820000	6.23813
chr1	8525000	8530000	chr1:8875000-8880000	6.65713
chr1	8535000	8540000	chr1:8875000-8880000	10.4388
chr1	8540000	8545000	chr1:8875000-8880000	5.47222
chr1	8550000	8555000	chr1:8815000-8820000	4.18535
chr1	8550000	8555000	chr1:8875000-8880000	2.33324
chr1	8560000	8565000	chr1:8660000-8665000	3.38926
chr1	8560000	8565000	chr1:8665000-8670000	2.15227
chr1	8560000	8565000	chr1:8675000-8680000	2.97828
chr1	8560000	8565000	chr1:8700000-8705000	8.79009
chr1	8560000	8565000	chr1:8710000-8715000	7.19508
chr1	8560000	8565000	chr1:8785000-8790000	2.61872
chr1	8560000	8565000	chr1:8790000-8795000	2.42233
chr1	8560000	8565000	chr1:8815000-8820000	2.96472
chr1	8560000	8565000	chr1:8875000-8880000	7.08615
chr1	8570000	8575000	chr1:8660000-8665000	3.16271
chr1	8570000	8575000	chr1:8665000-8670000	3.8694
chr1	8570000	8575000	chr1:8725000-8730000	2.39095
chr1	8570000	8575000	chr1:8815000-8820000	3.3354
chr1	8605000	8610000	chr1:8660000-8665000	2.14771
chr1	8625000	8630000	chr1:8660000-8665000	2.46228
chr1	8660000	8665000	chr1:8560000-8565000	3.38926
chr1	8660000	8665000	chr1:8570000-8575000	3.16271
chr1	8660000	8665000	chr1:8605000-8610000	2.14771
chr1	8660000	8665000	chr1:8625000-8630000	2.46228
chr1	8660000	8665000	chr1:8875000-8880000	2.525
chr1	8665000	8670000	chr1:8560000-8565000	2.15227
chr1	8665000	8670000	chr1:8570000-8575000	3.8694
chr1	8675000	8680000	chr1:8560000-8565000	2.97828
chr1	8700000	8705000	chr1:8410000-8415000	2.36575
chr1	8700000	8705000	chr1:8420000-8425000	5.13014
chr1	8700000	8705000	chr1:8425000-8430000	2.66637
chr1	8700000	8705000	chr1:8460000-8465000	2.08402
chr1	8700000	8705000	chr1:8525000-8530000	2.1054
chr1	8700000	8705000	chr1:8560000-8565000	8.79009
chr1	8710000	8715000	chr1:8425000-8430000	3.64316
chr1	8710000	8715000	chr1:8560000-8565000	7.19508
chr1	8725000	8730000	chr1:8515000-8520000	2.71962
chr1	8725000	8730000	chr1:8570000-8575000	2.39095
chr1	8725000	8730000	chr1:8815000-8820000	4.11615
chr1	8745000	8750000	chr1:8815000-8820000	7.14494
chr1	8755000	8760000	chr1:8815000-8820000	3.32268
chr1	8760000	8765000	chr1:8785000-8790000	2.91095
chr1	8760000	8765000	chr1:8815000-8820000	2.48106
chr1	8785000	8790000	chr1:8560000-8565000	2.61872
chr1	8785000	8790000	chr1:8760000-8765000	2.91095
chr1	8790000	8795000	chr1:8560000-8565000	2.42233
chr1	8790000	8795000	chr1:8815000-8820000	2.79581
chr1	8815000	8820000	chr1:8390000-8395000	7.95135
chr1	8815000	8820000	chr1:8420000-8425000	5.66883
chr1	8815000	8820000	chr1:8425000-8430000	3.10404
chr1	8815000	8820000	chr1:8515000-8520000	5.49624
chr1	8815000	8820000	chr1:8520000-8525000	5.13575
chr1	8815000	8820000	chr1:8525000-8530000	6.23813
chr1	8815000	8820000	chr1:8550000-8555000	4.18535
chr1	8815000	8820000	chr1:8560000-8565000	2.96472
chr1	8815000	8820000	chr1:8570000-8575000	3.3354
chr1	8815000	8820000	chr1:8725000-8730000	4.11615
chr1	8815000	8820000	chr1:8745000-8750000	7.14494
chr1	8815000	8820000	chr1:8755000-8760000	3.32268
chr1	8815000	8820000	chr1:8760000-8765000	2.48106
chr1	8815000	8820000	chr1:8790000-8795000	2.79581
chr1	8825000	8830000	chr1:8515000-8520000	5.45021
chr1	8875000	8880000	chr1:10030000-10035000	2.21688
chr1	8875000	8880000	chr1:7950000-7955000	2.73634
chr1	8875000	8880000	chr1:7960000-7965000	5.13084
chr1	8875000	8880000	chr1:7970000-7975000	2.67818
chr1	8875000	8880000	chr1:7985000-7990000	3.59661
chr1	8875000	8880000	chr1:8195000-8200000	3.39182
chr1	8875000	8880000	chr1:8365000-8370000	4.42546
chr1	8875000	8880000	chr1:8370000-8375000	3.18349
chr1	8875000	8880000	chr1:8375000-8380000	2.36264
chr1	8875000	8880000	chr1:8380000-8385000	2.01209
chr1	8875000	8880000	chr1:8385000-8390000	3.83023
chr1	8875000	8880000	chr1:8390000-8395000	8.62259
chr1	8875000	8880000	chr1:8405000-8410000	6.18469
chr1	8875000	8880000	chr1:8410000-8415000	7.06291
chr1	8875000	8880000	chr1:8420000-8425000	6.89733
chr1	8875000	8880000	chr1:8425000-8430000	7.2306
chr1	8875000	8880000	chr1:8435000-8440000	2.38432
chr1	8875000	8880000	chr1:8440000-8445000	2.51638
chr1	8875000	8880000	chr1:8460000-8465000	3.57079
chr1	8875000	8880000	chr1:8505000-8510000	5.02075
chr1	8875000	8880000	chr1:8515000-8520000	5.72429
chr1	8875000	8880000	chr1:8520000-8525000	12.6707
chr1	8875000	8880000	chr1:8525000-8530000	6.65713
chr1	8875000	8880000	chr1:8535000-8540000	10.4388
chr1	8875000	8880000	chr1:8540000-8545000	5.47222
chr1	8875000	8880000	chr1:8550000-8555000	2.33324
chr1	8875000	8880000	chr1:8560000-8565000	7.08615
chr1	8875000	8880000	chr1:8660000-8665000	2.525
chr1	8875000	8880000	chr1:8910000-8915000	9.1439
chr1	8875000	8880000	chr1:8990000-8995000	4.84682
chr1	8875000	8880000	chr1:9000000-9005000	6.74809
chr1	8875000	8880000	chr1:9015000-9020000	2.99356
chr1	8875000	8880000	chr1:9125000-9130000	2.18797
chr1	8875000	8880000	chr1:9175000-9180000	2.03544
chr1	8875000	8880000	chr1:9230000-9235000	7.46725
chr1	8875000	8880000	chr1:9235000-9240000	20.5409
chr1	8875000	8880000	chr1:9240000-9245000	21.5079
chr1	8875000	8880000	chr1:9245000-9250000	3.14164
chr1	8875000	8880000	chr1:9425000-9430000	3.28926
chr1	8875000	8880000	chr1:9520000-9525000	2.19487
chr1	8875000	8880000	chr1:9535000-9540000	7.72472
chr1	8875000	8880000	chr1:9540000-9545000	9.3338
chr1	8875000	8880000	chr1:9555000-9560000	5.95776
chr1	8875000	8880000	chr1:9560000-9565000	2.23023
chr1	8875000	8880000	chr1:9585000-9590000	5.26669
chr1	8875000	8880000	chr1:9715000-9720000	9.09886
chr1	8880000	8885000	chr1:9235000-9240000	10.1942
chr1	8880000	8885000	chr1:9240000-9245000	2.27714
chr1	8910000	8915000	chr1:8875000-8880000	9.1439
chr1	8990000	8995000	chr1:8875000-8880000	4.84682
chr1	9000000	9005000	chr1:8875000-8880000	6.74809
chr1	9015000	9020000	chr1:8875000-8880000	2.99356
chr1	9125000	9130000	chr1:8875000-8880000	2.18797
chr1	9125000	9130000	chr1:9240000-9245000	6.36483
chr1	9175000	9180000	chr1:8875000-8880000	2.03544
chr1	9230000	9235000	chr1:8875000-8880000	7.46725
chr1	9235000	9240000	chr1:8875000-8880000	20.5409
chr1	9235000	9240000	chr1:8880000-8885000	10.1942
chr1	9235000	9240000	chr1:9535000-9540000	5.31702
chr1	9235000	9240000	chr1:9540000-9545000	2.54583
chr1	9235000	9240000	chr1:9715000-9720000	5.43638
chr1	9240000	9245000	chr1:8875000-8880000	21.5079
chr1	9240000	9245000	chr1:8880000-8885000	2.27714
chr1	9240000	9245000	chr1:9125000-9130000	6.36483
chr1	9240000	9245000	chr1:9535000-9540000	4.64291
chr1	9240000	9245000	chr1:9715000-9720000	2.06002
chr1	9245000	9250000	chr1:8875000-8880000	3.14164
chr1	9425000	9430000	chr1:8875000-8880000	3.28926
chr1	9520000	9525000	chr1:8875000-8880000	2.19487
chr1	9535000	9540000	chr1:8875000-8880000	7.72472
chr1	9535000	9540000	chr1:9235000-9240000	5.31702
chr1	9535000	9540000	chr1:9240000-9245000	4.64291
chr1	9535000	9540000	chr1:9560000-9565000	3.18311
chr1	9540000	9545000	chr1:8875000-8880000	9.3338
chr1	9540000	9545000	chr1:9235000-9240000	2.54583
chr1	9555000	9560000	chr1:8875000-8880000	5.95776
chr1	9555000	9560000	chr1:9715000-9720000	2.66718
chr1	9560000	9565000	chr1:8875000-8880000	2.23023
chr1	9560000	9565000	chr1:9535000-9540000	3.18311
chr1	9585000	9590000	chr1:8875000-8880000	5.26669
chr1	9585000	9590000	chr1:9715000-9720000	5.97116
chr1	9590000	9595000	chr1:9715000-9720000	7.67564
chr1	9610000	9615000	chr1:9715000-9720000	23.4217
chr1	9625000	9630000	chr1:10395000-10400000	2.79677
chr1	9625000	9630000	chr1:9685000-9690000	13.1149
chr1	9625000	9630000	chr1:9690000-9695000	14.3265
chr1	9625000	9630000	chr1:9700000-9705000	2.77224
chr1	9625000	9630000	chr1:9715000-9720000	102.537
chr1	9625000	9630000	chr1:9865000-9870000	2.68794
chr1	9630000	9635000	chr1:10425000-10430000	2.52695
chr1	9630000	9635000	chr1:10470000-10475000	2.69426
chr1	9630000	9635000	chr1:9650000-9655000	3.20135
chr1	9630000	9635000	chr1:9685000-9690000	13.4996
chr1	9630000	9635000	chr1:9715000-9720000	110.879
chr1	9645000	9650000	chr1:10470000-10475000	2.60958
chr1	9650000	9655000	chr1:9630000-9635000	3.20135
chr1	9650000	9655000	chr1:9715000-9720000	8.35109
chr1	9655000	9660000	chr1:9685000-9690000	3.80076
chr1	9655000	9660000	chr1:9715000-9720000	7.44837
chr1	9660000	9665000	chr1:10470000-10475000	3.57744
chr1	9670000	9675000	chr1:9715000-9720000	11.4279
chr1	9675000	9680000	chr1:9715000-9720000	5.58003
chr1	9685000	9690000	chr1:10395000-10400000	2.17167
chr1	9685000	9690000	chr1:9625000-9630000	13.1149
chr1	9685000	9690000	chr1:9630000-9635000	13.4996
chr1	9685000	9690000	chr1:9655000-9660000	3.80076
chr1	9685000	9690000	chr1:9715000-9720000	2.62213
chr1	9690000	9695000	chr1:9625000-9630000	14.3265
chr1	9690000	9695000	chr1:9715000-9720000	41.7035
chr1	9700000	9705000	chr1:9625000-9630000	2.77224
chr1	9715000	9720000	chr1:10030000-10035000	10.6332
chr1	9715000	9720000	chr1:10035000-10040000	6.18346
chr1	9715000	9720000	chr1:10045000-10050000	4.29862
chr1	9715000	9720000	chr1:10185000-10190000	2.07131
chr1	9715000	9720000	chr1:10205000-10210000	3.56324
chr1	9715000	9720000	chr1:10210000-10215000	9.50768
chr1	9715000	9720000	chr1:10340000-10345000	2.37108
chr1	9715000	9720000	chr1:10350000-10355000	2.98863
chr1	9715000	9720000	chr1:10385000-10390000	3.25323
chr1	9715000	9720000	chr1:10395000-10400000	21.648
chr1	9715000	9720000	chr1:10400000-10405000	13.9478
chr1	9715000	9720000	chr1:10405000-10410000	7.82356
chr1	9715000	9720000	chr1:10410000-10415000	11.1436
chr1	9715000	9720000	chr1:10415000-10420000	17.0453
chr1	9715000	9720000	chr1:10420000-10425000	7.195
chr1	9715000	9720000	chr1:10425000-10430000	14.7302
chr1	9715000	9720000	chr1:10430000-10435000	10.6264
chr1	9715000	9720000	chr1:10435000-10440000	4.51747
chr1	9715000	9720000	chr1:10440000-10445000	3.95127
chr1	9715000	9720000	chr1:10445000-10450000	2.64806
chr1	9715000	9720000	chr1:10455000-10460000	2.57776
chr1	9715000	9720000	chr1:10460000-10465000	6.84915
chr1	9715000	9720000	chr1:10465000-10470000	4.28475
chr1	9715000	9720000	chr1:10470000-10475000	23.7567
chr1	9715000	9720000	chr1:10475000-10480000	7.69756
chr1	9715000	9720000	chr1:11010000-11015000	3.46439
chr1	9715000	9720000	chr1:8875000-8880000	9.09886
chr1	9715000	9720000	chr1:9235000-9240000	5.43638
chr1	9715000	9720000	chr1:9240000-9245000	2.06002
chr1	9715000	9720000	chr1:9555000-9560000	2.66718
chr1	9715000	9720000	chr1:9585000-9590000	5.97116
chr1	9715000	9720000	chr1:9590000-9595000	7.67564
chr1	9715000	9720000	chr1:9610000-9615000	23.4217
chr1	9715000	9720000	chr1:9625000-9630000	102.537
chr1	9715000	9720000	chr1:9630000-9635000	110.879
chr1	9715000	9720000	chr1:9650000-9655000	8.35109
chr1	9715000	9720000	chr1:9655000-9660000	7.44837
chr1	9715000	9720000	chr1:9670000-9675000	11.4279
chr1	9715000	9720000	chr1:9675000-9680000	5.58003
chr1	9715000	9720000	chr1:9685000-9690000	2.62213
chr1	9715000	9720000	chr1:9690000-9695000	41.7035
chr1	9715000	9720000	chr1:9735000-9740000	4.10385
chr1	9715000	9720000	chr1:9750000-9755000	2.04306
chr1	9715000	9720000	chr1:9800000-9805000	3.75131
chr1	9715000	9720000	chr1:9805000-9810000	5.24829
chr1	9715000	9720000	chr1:9820000-9825000	8.22347
chr1	9715000	9720000	chr1:9840000-9845000	3.50051
chr1	9715000	9720000	chr1:9845000-9850000	7.19435
chr1	9715000	9720000	chr1:9850000-9855000	9.32628
chr1	9715000	9720000	chr1:9855000-9860000	7.16559
chr1	9715000	9720000	chr1:9860000-9865000	5.03827
chr1	9715000	9720000	chr1:9865000-9870000	27.685
chr1	9715000	9720000	chr1:9890000-9895000	3.14279
chr1	9715000	9720000	chr1:9940000-9945000	3.21244
chr1	9735000	9740000	chr1:9715000-9720000	4.10385
chr1	9750000	9755000	chr1:9715000-9720000	2.04306
chr1	9765000	9770000	chr1:10395000-10400000	4.44455
chr1	9765000	9770000	chr1:10470000-10475000	2.37242
chr1	9800000	9805000	chr1:10470000-10475000	4.94207
chr1	9800000	9805000	chr1:9715000-9720000	3.75131
chr1	9805000	9810000	chr1:10470000-10475000	3.74247
chr1	9805000	9810000	chr1:9715000-9720000	5.24829
chr1	9820000	9825000	chr1:10470000-10475000	2.82838
chr1	9820000	9825000	chr1:9715000-9720000	8.22347
chr1	9840000	9845000	chr1:9715000-9720000	3.50051
chr1	9845000	9850000	chr1:9715000-9720000	7.19435
chr1	9850000	9855000	chr1:9715000-9720000	9.32628
chr1	9855000	9860000	chr1:9715000-9720000	7.16559
chr1	9860000	9865000	chr1:9715000-9720000	5.03827
chr1	9865000	9870000	chr1:10030000-10035000	3.21015
chr1	9865000	9870000	chr1:9625000-9630000	2.68794
chr1	9865000	9870000	chr1:9715000-9720000	27.685
chr1	9875000	9880000	chr1:10030000-10035000	12.7601
chr1	9875000	9880000	chr1:10395000-10400000	2.76427
chr1	9875000	9880000	chr1:9930000-9935000	2.06956
chr1	9875000	9880000	chr1:9940000-9945000	12.9503
chr1	9880000	9885000	chr1:10030000-10035000	15.0528
chr1	9880000	9885000	chr1:10395000-10400000	2.40314
chr1	9880000	9885000	chr1:9940000-9945000	8.46857
chr1	9890000	9895000	chr1:10030000-10035000	12.3093
chr1	9890000	9895000	chr1:10395000-10400000	3.37821
chr1	9890000	9895000	chr1:10470000-10475000	5.17237
chr1	9890000	9895000	chr1:9715000-9720000	3.14279
chr1	9890000	9895000	chr1:9940000-9945000	6.07821
chr1	9905000	9910000	chr1:10030000-10035000	9.38037
chr1	9905000	9910000	chr1:10395000-10400000	2.73963
chr1	9905000	9910000	chr1:10430000-10435000	3.33285
chr1	9905000	9910000	chr1:10470000-10475000	5.1168
chr1	9910000	9915000	chr1:10395000-10400000	2.99234
chr1	9910000	9915000	chr1:10415000-10420000	4.98772
chr1	9910000	9915000	chr1:10425000-10430000	2.11029
chr1	9910000	9915000	chr1:9930000-9935000	3.04429
chr1	9925000	9930000	chr1:10030000-10035000	4.85948
chr1	9925000	9930000	chr1:10395000-10400000	4.31184
chr1	9925000	9930000	chr1:10425000-10430000	2.52619
chr1	9925000	9930000	chr1:10430000-10435000	3.27954
chr1	9925000	9930000	chr1:10470000-10475000	4.02861
chr1	9930000	9935000	chr1:10395000-10400000	2.26184
chr1	9930000	9935000	chr1:10410000-10415000	2.40245
chr1	9930000	9935000	chr1:10470000-10475000	5.124
chr1	9930000	9935000	chr1:9875000-9880000	2.06956
chr1	9930000	9935000	chr1:9910000-9915000	3.04429
chr1	9940000	9945000	chr1:10025000-10030000	5.39372
chr1	9940000	9945000	chr1:10030000-10035000	44.2844
chr1	9940000	9945000	chr1:10035000-10040000	7.64784
chr1	9940000	9945000	chr1:10210000-10215000	4.75893
chr1	9940000	9945000	chr1:10310000-10315000	2.43679
chr1	9940000	9945000	chr1:10395000-10400000	12.2193
chr1	9940000	9945000	chr1:10400000-10405000	3.25574
chr1	9940000	9945000	chr1:10415000-10420000	6.22968
chr1	9940000	9945000	chr1:10425000-10430000	10.017
chr1	9940000	9945000	chr1:10430000-10435000	2.79019
chr1	9940000	9945000	chr1:10470000-10475000	10.2335
chr1	9940000	9945000	chr1:9715000-9720000	3.21244
chr1	9940000	9945000	chr1:9875000-9880000	12.9503
chr1	9940000	9945000	chr1:9880000-9885000	8.46857
chr1	9940000	9945000	chr1:9890000-9895000	6.07821
chr1	9950000	9955000	chr1:10025000-10030000	5.44885
chr1	9950000	9955000	chr1:10030000-10035000	42.9918
chr1	9950000	9955000	chr1:10470000-10475000	4.58029
chr1	10025000	10030000	chr1:10415000-10420000	2.08404
chr1	10025000	10030000	chr1:9940000-9945000	5.39372
chr1	10025000	10030000	chr1:9950000-9955000	5.44885
chr1	10030000	10035000	chr1:10340000-10345000	3.68723
chr1	10030000	10035000	chr1:10385000-10390000	2.26061
chr1	10030000	10035000	chr1:10395000-10400000	7.85006
chr1	10030000	10035000	chr1:10400000-10405000	6.15834
chr1	10030000	10035000	chr1:10410000-10415000	5.39
chr1	10030000	10035000	chr1:10415000-10420000	5.06149
chr1	10030000	10035000	chr1:10425000-10430000	9.22131
chr1	10030000	10035000	chr1:10430000-10435000	6.93178
chr1	10030000	10035000	chr1:8875000-8880000	2.21688
chr1	10030000	10035000	chr1:9715000-9720000	10.6332
chr1	10030000	10035000	chr1:9865000-9870000	3.21015
chr1	10030000	10035000	chr1:9875000-9880000	12.7601
chr1	10030000	10035000	chr1:9880000-9885000	15.0528
chr1	10030000	10035000	chr1:9890000-9895000	12.3093
chr1	10030000	10035000	chr1:9905000-9910000	9.38037
chr1	10030000	10035000	chr1:9925000-9930000	4.85948
chr1	10030000	10035000	chr1:9940000-9945000	44.2844
chr1	10030000	10035000	chr1:9950000-9955000	42.9918
chr1	10035000	10040000	chr1:10395000-10400000	4.30054
chr1	10035000	10040000	chr1:9715000-9720000	6.18346
chr1	10035000	10040000	chr1:9940000-9945000	7.64784
chr1	10045000	10050000	chr1:10395000-10400000	2.03375
chr1	10045000	10050000	chr1:9715000-9720000	4.29862
chr1	10185000	10190000	chr1:9715000-9720000	2.07131
chr1	10205000	10210000	chr1:10395000-10400000	6.02889
chr1	10205000	10210000	chr1:10425000-10430000	2.15349
chr1	10205000	10210000	chr1:10470000-10475000	3.06885
chr1	10205000	10210000	chr1:9715000-9720000	3.56324
chr1	10210000	10215000	chr1:10335000-10340000	2.16551
chr1	10210000	10215000	chr1:10340000-10345000	2.29468
chr1	10210000	10215000	chr1:10365000-10370000	2.55985
chr1	10210000	10215000	chr1:10395000-10400000	11.6777
chr1	10210000	10215000	chr1:10400000-10405000	8.44687
chr1	10210000	10215000	chr1:10410000-10415000	3.5389
chr1	10210000	10215000	chr1:10415000-10420000	3.15255
chr1	10210000	10215000	chr1:10425000-10430000	8.67064
chr1	10210000	10215000	chr1:10470000-10475000	4.52513
chr1	10210000	10215000	chr1:9715000-9720000	9.50768
chr1	10210000	10215000	chr1:9940000-9945000	4.75893
chr1	10230000	10235000	chr1:10395000-10400000	2.97744
chr1	10310000	10315000	chr1:9940000-9945000	2.43679
chr1	10335000	10340000	chr1:10210000-10215000	2.16551
chr1	10340000	10345000	chr1:10030000-10035000	3.68723
chr1	10340000	10345000	chr1:10210000-10215000	2.29468
chr1	10340000	10345000	chr1:9715000-9720000	2.37108
chr1	10350000	10355000	chr1:9715000-9720000	2.98863
chr1	10365000	10370000	chr1:10210000-10215000	2.55985
chr1	10385000	10390000	chr1:10030000-10035000	2.26061
chr1	10385000	10390000	chr1:9715000-9720000	3.25323
chr1	10395000	10400000	chr1:10030000-10035000	7.85006
chr1	10395000	10400000	chr1:10035000-10040000	4.30054
chr1	10395000	10400000	chr1:10045000-10050000	2.03375
chr1	10395000	10400000	chr1:10205000-10210000	6.02889
chr1	10395000	10400000	chr1:10210000-10215000	11.6777
chr1	10395000	10400000	chr1:10230000-10235000	2.97744
chr1	10395000	10400000	chr1:9625000-9630000	2.79677
chr1	10395000	10400000	chr1:9685000-9690000	2.17167
chr1	10395000	10400000	chr1:9715000-9720000	21.648
chr1	10395000	10400000	chr1:9765000-9770000	4.44455
chr1	10395000	10400000	chr1:9875000-9880000	2.76427
chr1	10395000	10400000	chr1:9880000-9885000	2.40314
chr1	10395000	10400000	chr1:9890000-9895000	3.37821
chr1	10395000	10400000	chr1:9905000-9910000	2.73963
chr1	10395000	10400000	chr1:9910000-9915000	2.99234
chr1	10395000	10400000	chr1:9925000-9930000	4.31184
chr1	10395000	10400000	chr1:9930000-9935000	2.26184
chr1	10395000	10400000	chr1:9940000-9945000	12.2193
chr1	10400000	10405000	chr1:10030000-10035000	6.15834
chr1	10400000	10405000	chr1:10210000-10215000	8.44687
chr1	10400000	10405000	chr1:9715000-9720000	13.9478
chr1	10400000	10405000	chr1:9940000-9945000	3.25574
chr1	10405000	10410000	chr1:9715000-9720000	7.82356
chr1	10410000	10415000	chr1:10030000-10035000	5.39
chr1	10410000	10415000	chr1:10210000-10215000	3.5389
chr1	10410000	10415000	chr1:9715000-9720000	11.1436
chr1	10410000	10415000	chr1:9930000-9935000	2.40245
chr1	10415000	10420000	chr1:10025000-10030000	2.08404
chr1	10415000	10420000	chr1:10030000-10035000	5.06149
chr1	10415000	10420000	chr1:10210000-10215000	3.15255
chr1	10415000	10420000	chr1:9715000-9720000	17.0453
chr1	10415000	10420000	chr1:9910000-9915000	4.98772
chr1	10415000	10420000	chr1:9940000-9945000	6.22968
chr1	10420000	10425000	chr1:9715000-9720000	7.195
chr1	10425000	10430000	chr1:10030000-10035000	9.22131
chr1	10425000	10430000	chr1:10205000-10210000	2.15349
chr1	10425000	10430000	chr1:10210000-10215000	8.67064
chr1	10425000	10430000	chr1:9630000-9635000	2.52695
chr1	10425000	10430000	chr1:9715000-9720000	14.7302
chr1	10425000	10430000	chr1:9910000-9915000	2.11029
chr1	10425000	10430000	chr1:9925000-9930000	2.52619
chr1	10425000	10430000	chr1:9940000-9945000	10.017
chr1	10430000	10435000	chr1:10030000-10035000	6.93178
chr1	10430000	10435000	chr1:10470000-10475000	3.70555
chr1	10430000	10435000	chr1:10490000-10495000	3.13289
chr1	10430000	10435000	chr1:9715000-9720000	10.6264
chr1	10430000	10435000	chr1:9905000-9910000	3.33285
chr1	10430000	10435000	chr1:9925000-9930000	3.27954
chr1	10430000	10435000	chr1:9940000-9945000	2.79019
chr1	10435000	10440000	chr1:10470000-10475000	8.27831
chr1	10435000	10440000	chr1:9715000-9720000	4.51747
chr1	10440000	10445000	chr1:10470000-10475000	3.28747
chr1	10440000	10445000	chr1:9715000-9720000	3.95127
chr1	10445000	10450000	chr1:10470000-10475000	10.84
chr1	10445000	10450000	chr1:9715000-9720000	2.64806
chr1	10455000	10460000	chr1:9715000-9720000	2.57776
chr1	10460000	10465000	chr1:9715000-9720000	6.84915
chr1	10465000	10470000	chr1:9715000-9720000	4.28475
chr1	10470000	10475000	chr1:10205000-10210000	3.06885
chr1	10470000	10475000	chr1:10210000-10215000	4.52513
chr1	10470000	10475000	chr1:10430000-10435000	3.70555
chr1	10470000	10475000	chr1:10435000-10440000	8.27831
chr1	10470000	10475000	chr1:10440000-10445000	3.28747
chr1	10470000	10475000	chr1:10445000-10450000	10.84
chr1	10470000	10475000	chr1:10490000-10495000	12.7753
chr1	10470000	10475000	chr1:10800000-10805000	3.00101
chr1	10470000	10475000	chr1:10875000-10880000	4.21062
chr1	10470000	10475000	chr1:10885000-10890000	3.1529
chr1	10470000	10475000	chr1:10940000-10945000	13.0593
chr1	10470000	10475000	chr1:11010000-11015000	12.9583
chr1	10470000	10475000	chr1:9630000-9635000	2.69426
chr1	10470000	10475000	chr1:9645000-9650000	2.60958
chr1	10470000	10475000	chr1:9660000-9665000	3.57744
chr1	10470000	10475000	chr1:9715000-9720000	23.7567
chr1	10470000	10475000	chr1:9765000-9770000	2.37242
chr1	10470000	10475000	chr1:9800000-9805000	4.94207
chr1	10470000	10475000	chr1:9805000-9810000	3.74247
chr1	10470000	10475000	chr1:9820000-9825000	2.82838
chr1	10470000	10475000	chr1:9890000-9895000	5.17237
chr1	10470000	10475000	chr1:9905000-9910000	5.1168
chr1	10470000	10475000	chr1:9925000-9930000	4.02861
chr1	10470000	10475000	chr1:9930000-9935000	5.124
chr1	10470000	10475000	chr1:9940000-9945000	10.2335
chr1	10470000	10475000	chr1:9950000-9955000	4.58029
chr1	10475000	10480000	chr1:9715000-9720000	7.69756
chr1	10490000	10495000	chr1:10430000-10435000	3.13289
chr1	10490000	10495000	chr1:10470000-10475000	12.7753
chr1	10510000	10515000	chr1:10660000-10665000	4.11834
chr1	10510000	10515000	chr1:10685000-10690000	2.27194
chr1	10510000	10515000	chr1:10875000-10880000	7.27944
chr1	10510000	10515000	chr1:10885000-10890000	4.20947
chr1	10510000	10515000	chr1:10935000-10940000	7.45184
chr1	10510000	10515000	chr1:10940000-10945000	13.2361
chr1	10510000	10515000	chr1:11010000-11015000	4.35523
chr1	10660000	10665000	chr1:10510000-10515000	4.11834
chr1	10685000	10690000	chr1:10510000-10515000	2.27194
chr1	10800000	10805000	chr1:10470000-10475000	3.00101
chr1	10875000	10880000	chr1:10470000-10475000	4.21062
chr1	10875000	10880000	chr1:10510000-10515000	7.27944
chr1	10885000	10890000	chr1:10470000-10475000	3.1529
chr1	10885000	10890000	chr1:10510000-10515000	4.20947
chr1	10935000	10940000	chr1:10510000-10515000	7.45184
chr1	10940000	10945000	chr1:10470000-10475000	13.0593
chr1	10940000	10945000	chr1:10510000-10515000	13.2361
chr1	10940000	10945000	chr1:11010000-11015000	4.25641
chr1	11010000	11015000	chr1:10470000-10475000	12.9583
chr1	11010000	11015000	chr1:10510000-10515000	4.35523
chr1	11010000	11015000	chr1:10940000-10945000	4.25641
chr1	11010000	11015000	chr1:11030000-11035000	2.48439
chr1	11010000	11015000	chr1:11260000-11265000	2.154
chr1	11010000	11015000	chr1:11635000-11640000	2.40582
chr1	11010000	11015000	chr1:11680000-11685000	2.86784
chr1	11010000	11015000	chr1:11730000-11735000	9.54343
chr1	11010000	11015000	chr1:11735000-11740000	8.13591
chr1	11010000	11015000	chr1:11805000-11810000	5.20401
chr1	11010000	11015000	chr1:9715000-9720000	3.46439
chr1	11030000	11035000	chr1:11010000-11015000	2.48439
chr1	11030000	11035000	chr1:11735000-11740000	2.29912
chr1	11045000	11050000	chr1:11270000-11275000	3.11969
chr1	11045000	11050000	chr1:11660000-11665000	3.93151
chr1	11045000	11050000	chr1:11735000-11740000	2.7988
chr1	11045000	11050000	chr1:11795000-11800000	3.09847
chr1	11050000	11055000	chr1:11100000-11105000	2.23341
chr1	11050000	11055000	chr1:11735000-11740000	3.52715
chr1	11050000	11055000	chr1:11795000-11800000	4.65313
chr1	11050000	11055000	chr1:11805000-11810000	2.43935
chr1	11055000	11060000	chr1:11270000-11275000	2.73039
chr1	11055000	11060000	chr1:11660000-11665000	2.05237
chr1	11055000	11060000	chr1:11665000-11670000	2.93279
chr1	11055000	11060000	chr1:11715000-11720000	2.09493
chr1	11055000	11060000	chr1:11735000-11740000	8.91093
chr1	11055000	11060000	chr1:11795000-11800000	3.26448
chr1	11055000	11060000	chr1:11805000-11810000	5.86737
chr1	11060000	11065000	chr1:11080000-11085000	2.85115
chr1	11060000	11065000	chr1:11095000-11100000	4.26088
chr1	11060000	11065000	chr1:11235000-11240000	4.09025
chr1	11060000	11065000	chr1:11260000-11265000	6.51998
chr1	11060000	11065000	chr1:11270000-11275000	5.28226
chr1	11060000	11065000	chr1:11735000-11740000	8.68224
chr1	11060000	11065000	chr1:11795000-11800000	2.57968
chr1	11080000	11085000	chr1:11060000-11065000	2.85115
chr1	11095000	11100000	chr1:11060000-11065000	4.26088
chr1	11100000	11105000	chr1:11050000-11055000	2.23341
chr1	11235000	11240000	chr1:11060000-11065000	4.09025
chr1	11240000	11245000	chr1:11735000-11740000	2.35916
chr1	11260000	11265000	chr1:11010000-11015000	2.154
chr1	11260000	11265000	chr1:11060000-11065000	6.51998
chr1	11260000	11265000	chr1:11725000-11730000	4.36463
chr1	11260000	11265000	chr1:11730000-11735000	5.61961
chr1	11260000	11265000	chr1:11735000-11740000	6.77226
chr1	11260000	11265000	chr1:11740000-11745000	2.54607
chr1	11260000	11265000	chr1:11795000-11800000	2.09815
chr1	11260000	11265000	chr1:11805000-11810000	4.4881
chr1	11270000	11275000	chr1:11045000-11050000	3.11969
chr1	11270000	11275000	chr1:11055000-11060000	2.73039
chr1	11270000	11275000	chr1:11060000-11065000	5.28226
chr1	11270000	11275000	chr1:11650000-11655000	5.23232
chr1	11270000	11275000	chr1:11655000-11660000	3.6656
chr1	11270000	11275000	chr1:11695000-11700000	3.85219
chr1	11270000	11275000	chr1:11725000-11730000	3.66888
chr1	11270000	11275000	chr1:11735000-11740000	12.8718
chr1	11270000	11275000	chr1:11740000-11745000	2.01596
chr1	11270000	11275000	chr1:11795000-11800000	4.24321
chr1	11270000	11275000	chr1:11805000-11810000	7.30874
chr1	11295000	11300000	chr1:11730000-11735000	2.28175
chr1	11295000	11300000	chr1:11735000-11740000	3.30029
chr1	11635000	11640000	chr1:11010000-11015000	2.40582
chr1	11650000	11655000	chr1:11270000-11275000	5.23232
chr1	11655000	11660000	chr1:11270000-11275000	3.6656
chr1	11655000	11660000	chr1:11715000-11720000	4.91614
chr1	11655000	11660000	chr1:11725000-11730000	3.76755
chr1	11655000	11660000	chr1:11735000-11740000	4.33907
chr1	11655000	11660000	chr1:11740000-11745000	4.18429
chr1	11660000	11665000	chr1:11045000-11050000	3.93151
chr1	11660000	11665000	chr1:11055000-11060000	2.05237
chr1	11660000	11665000	chr1:11715000-11720000	8.3416
chr1	11660000	11665000	chr1:11720000-11725000	5.18758
chr1	11660000	11665000	chr1:11725000-11730000	5.68279
chr1	11660000	11665000	chr1:11730000-11735000	2.3112
chr1	11660000	11665000	chr1:11735000-11740000	6.67765
chr1	11660000	11665000	chr1:11795000-11800000	4.11376
chr1	11665000	11670000	chr1:11055000-11060000	2.93279
chr1	11665000	11670000	chr1:11735000-11740000	4.55448
chr1	11680000	11685000	chr1:11010000-11015000	2.86784
chr1	11680000	11685000	chr1:11715000-11720000	4.82755
chr1	11695000	11700000	chr1:11270000-11275000	3.85219
chr1	11715000	11720000	chr1:11055000-11060000	2.09493
chr1	11715000	11720000	chr1:11655000-11660000	4.91614
chr1	11715000	11720000	chr1:11660000-11665000	8.3416
chr1	11715000	11720000	chr1:11680000-11685000	4.82755
chr1	11720000	11725000	chr1:11660000-11665000	5.18758
chr1	11725000	11730000	chr1:11260000-11265000	4.36463
chr1	11725000	11730000	chr1:11270000-11275000	3.66888
chr1	11725000	11730000	chr1:11655000-11660000	3.76755
chr1	11725000	11730000	chr1:11660000-11665000	5.68279
chr1	11730000	11735000	chr1:11010000-11015000	9.54343
chr1	11730000	11735000	chr1:11260000-11265000	5.61961
chr1	11730000	11735000	chr1:11295000-11300000	2.28175
chr1	11730000	11735000	chr1:11660000-11665000	2.3112
chr1	11735000	11740000	chr1:11010000-11015000	8.13591
chr1	11735000	11740000	chr1:11030000-11035000	2.29912
chr1	11735000	11740000	chr1:11045000-11050000	2.7988
chr1	11735000	11740000	chr1:11050000-11055000	3.52715
chr1	11735000	11740000	chr1:11055000-11060000	8.91093
chr1	11735000	11740000	chr1:11060000-11065000	8.68224
chr1	11735000	11740000	chr1:11240000-11245000	2.35916
chr1	11735000	11740000	chr1:11260000-11265000	6.77226
chr1	11735000	11740000	chr1:11270000-11275000	12.8718
chr1	11735000	11740000	chr1:11295000-11300000	3.30029
chr1	11735000	11740000	chr1:11655000-11660000	4.33907
chr1	11735000	11740000	chr1:11660000-11665000	6.67765
chr1	11735000	11740000	chr1:11665000-11670000	4.55448
chr1	11740000	11745000	chr1:11260000-11265000	2.54607
chr1	11740000	11745000	chr1:11270000-11275000	2.01596
chr1	11740000	11745000	chr1:11655000-11660000	4.18429
chr1	11755000	11760000	chr1:11795000-11800000	2.2749
chr1	11755000	11760000	chr1:11805000-11810000	2.74139
chr1	11760000	11765000	chr1:11795000-11800000	3.61845
chr1	11760000	11765000	chr1:11805000-11810000	2.0432
chr1	11795000	11800000	chr1:11045000-11050000	3.09847
chr1	11795000	11800000	chr1:11050000-11055000	4.65313
chr1	11795000	11800000	chr1:11055000-11060000	3.26448
chr1	11795000	11800000	chr1:11060000-11065000	2.57968
chr1	11795000	11800000	chr1:11260000-11265000	2.09815
chr1	11795000	11800000	chr1:11270000-11275000	4.24321
chr1	11795000	11800000	chr1:11660000-11665000	4.11376
chr1	11795000	11800000	chr1:11755000-11760000	2.2749
chr1	11795000	11800000	chr1:11760000-11765000	3.61845
chr1	11805000	11810000	chr1:11010000-11015000	5.20401
chr1	11805000	11810000	chr1:11050000-11055000	2.43935
chr1	11805000	11810000	chr1:11055000-11060000	5.86737
chr1	11805000	11810000	chr1:11260000-11265000	4.4881
chr1	11805000	11810000	chr1:11270000-11275000	7.30874
chr1	11805000	11810000	chr1:11755000-11760000	2.74139
chr1	11805000	11810000	chr1:11760000-11765000	2.0432
chr1	11805000	11810000	chr1:12030000-12035000	2.18727
chr1	11840000	11845000	chr1:11880000-11885000	24.3951
chr1	11840000	11845000	chr1:11905000-11910000	10.3806
chr1	11840000	11845000	chr1:12015000-12020000	2.26425
chr1	11880000	11885000	chr1:11840000-11845000	24.3951
chr1	11905000	11910000	chr1:11840000-11845000	10.3806
chr1	11905000	11910000	chr1:11965000-11970000	2.97121
chr1	11910000	11915000	chr1:11955000-11960000	2.34052
chr1	11910000	11915000	chr1:11975000-11980000	4.15053
chr1	11910000	11915000	chr1:11980000-11985000	2.16012
chr1	11910000	11915000	chr1:12015000-12020000	12.9421
chr1	11925000	11930000	chr1:11955000-11960000	3.50276
chr1	11925000	11930000	chr1:11960000-11965000	3.73615
chr1	11930000	11935000	chr1:11955000-11960000	2.71493
chr1	11945000	11950000	chr1:12015000-12020000	2.38271
chr1	11955000	11960000	chr1:11910000-11915000	2.34052
chr1	11955000	11960000	chr1:11925000-11930000	3.50276
chr1	11955000	11960000	chr1:11930000-11935000	2.71493
chr1	11960000	11965000	chr1:11925000-11930000	3.73615
chr1	11965000	11970000	chr1:11905000-11910000	2.97121
chr1	11975000	11980000	chr1:11910000-11915000	4.15053
chr1	11980000	11985000	chr1:11910000-11915000	2.16012
chr1	12015000	12020000	chr1:11840000-11845000	2.26425
chr1	12015000	12020000	chr1:11910000-11915000	12.9421
chr1	12015000	12020000	chr1:11945000-11950000	2.38271
chr1	12015000	12020000	chr1:12035000-12040000	3.98969
chr1	12015000	12020000	chr1:12045000-12050000	2.87145
chr1	12015000	12020000	chr1:12075000-12080000	10.1894
chr1	12015000	12020000	chr1:12080000-12085000	11.9583
chr1	12015000	12020000	chr1:12105000-12110000	4.16573
chr1	12015000	12020000	chr1:12615000-12620000	2.8338
chr1	12030000	12035000	chr1:11805000-11810000	2.18727
chr1	12035000	12040000	chr1:12015000-12020000	3.98969
chr1	12045000	12050000	chr1:12015000-12020000	2.87145
chr1	12075000	12080000	chr1:12015000-12020000	10.1894
chr1	12080000	12085000	chr1:12015000-12020000	11.9583
chr1	12105000	12110000	chr1:12015000-12020000	4.16573
chr1	12105000	12110000	chr1:12200000-12205000	2.14371
chr1	12105000	12110000	chr1:12215000-12220000	4.99241
chr1	12105000	12110000	chr1:12615000-12620000	5.05045
chr1	12110000	12115000	chr1:12615000-12620000	3.26051
chr1	12115000	12120000	chr1:12615000-12620000	4.25741
chr1	12120000	12125000	chr1:12615000-12620000	6.78611
chr1	12125000	12130000	chr1:12185000-12190000	3.97212
chr1	12125000	12130000	chr1:12195000-12200000	7.06183
chr1	12125000	12130000	chr1:12200000-12205000	12.8804
chr1	12125000	12130000	chr1:12205000-12210000	9.93423
chr1	12125000	12130000	chr1:12215000-12220000	26.9811
chr1	12125000	12130000	chr1:12615000-12620000	9.19573
chr1	12140000	12145000	chr1:12200000-12205000	2.62183
chr1	12140000	12145000	chr1:12215000-12220000	4.23115
chr1	12165000	12170000	chr1:12615000-12620000	4.11491
chr1	12185000	12190000	chr1:12125000-12130000	3.97212
chr1	12195000	12200000	chr1:12125000-12130000	7.06183
chr1	12195000	12200000	chr1:12615000-12620000	2.91554
chr1	12200000	12205000	chr1:12105000-12110000	2.14371
chr1	12200000	12205000	chr1:12125000-12130000	12.8804
chr1	12200000	12205000	chr1:12140000-12145000	2.62183
chr1	12200000	12205000	chr1:12615000-12620000	7.85147
chr1	12205000	12210000	chr1:12125000-12130000	9.93423
chr1	12205000	12210000	chr1:12615000-12620000	7.09383
chr1	12210000	12215000	chr1:12615000-12620000	4.32759
chr1	12215000	12220000	chr1:12105000-12110000	4.99241
chr1	12215000	12220000	chr1:12125000-12130000	26.9811
chr1	12215000	12220000	chr1:12140000-12145000	4.23115
chr1	12215000	12220000	chr1:12615000-12620000	18.9668
chr1	12220000	12225000	chr1:12615000-12620000	3.83256
chr1	12225000	12230000	chr1:12495000-12500000	2.09212
chr1	12225000	12230000	chr1:12615000-12620000	20.5424
chr1	12230000	12235000	chr1:12525000-12530000	3.88975
chr1	12230000	12235000	chr1:12615000-12620000	12.7298
chr1	12235000	12240000	chr1:12615000-12620000	10.0876
chr1	12250000	12255000	chr1:12615000-12620000	7.52415
chr1	12255000	12260000	chr1:12615000-12620000	6.53177
chr1	12260000	12265000	chr1:12615000-12620000	4.96432
chr1	12265000	12270000	chr1:12615000-12620000	43.7971
chr1	12270000	12275000	chr1:12615000-12620000	16.0538
chr1	12275000	12280000	chr1:12615000-12620000	9.19967
chr1	12280000	12285000	chr1:12615000-12620000	3.13062
chr1	12285000	12290000	chr1:12615000-12620000	9.46823
chr1	12290000	12295000	chr1:12615000-12620000	5.47894
chr1	12295000	12300000	chr1:12615000-12620000	4.10961
chr1	12305000	12310000	chr1:12445000-12450000	2.2704
chr1	12305000	12310000	chr1:12615000-12620000	36.6085
chr1	12310000	12315000	chr1:12615000-12620000	36.2339
chr1	12315000	12320000	chr1:12615000-12620000	21.1979
chr1	12320000	12325000	chr1:12615000-12620000	17.6475
chr1	12325000	12330000	chr1:12615000-12620000	9.48329
chr1	12330000	12335000	chr1:12615000-12620000	9.44262
chr1	12335000	12340000	chr1:12615000-12620000	7.61214
chr1	12340000	12345000	chr1:12615000-12620000	2.62638
chr1	12350000	12355000	chr1:12615000-12620000	12.5614
chr1	12355000	12360000	chr1:12615000-12620000	3.96738
chr1	12365000	12370000	chr1:12615000-12620000	2.72245
chr1	12370000	12375000	chr1:12615000-12620000	13.9876
chr1	12385000	12390000	chr1:12615000-12620000	4.03309
chr1	12390000	12395000	chr1:12615000-12620000	5.41907
chr1	12405000	12410000	chr1:12445000-12450000	3.26275
chr1	12405000	12410000	chr1:12475000-12480000	3.64749
chr1	12405000	12410000	chr1:12525000-12530000	7.91188
chr1	12405000	12410000	chr1:12615000-12620000	39.7648
chr1	12430000	12435000	chr1:12525000-12530000	2.60323
chr1	12430000	12435000	chr1:12615000-12620000	15.4483
chr1	12435000	12440000	chr1:12615000-12620000	47.1554
chr1	12445000	12450000	chr1:12305000-12310000	2.2704
chr1	12445000	12450000	chr1:12405000-12410000	3.26275
chr1	12445000	12450000	chr1:12475000-12480000	2.63852
chr1	12445000	12450000	chr1:12510000-12515000	2.73938
chr1	12445000	12450000	chr1:12515000-12520000	2.00518
chr1	12445000	12450000	chr1:12525000-12530000	14.7527
chr1	12445000	12450000	chr1:12540000-12545000	2.21271
chr1	12445000	12450000	chr1:12545000-12550000	4.57258
chr1	12445000	12450000	chr1:12550000-12555000	9.47579
chr1	12445000	12450000	chr1:12570000-12575000	7.1379
chr1	12445000	12450000	chr1:12600000-12605000	9.72469
chr1	12445000	12450000	chr1:12605000-12610000	13.2239
chr1	12445000	12450000	chr1:12615000-12620000	138.105
chr1	12450000	12455000	chr1:12615000-12620000	43.4029
chr1	12460000	12465000	chr1:12525000-12530000	2.59026
chr1	12460000	12465000	chr1:12615000-12620000	24.93
chr1	12470000	12475000	chr1:12605000-12610000	5.68503
chr1	12470000	12475000	chr1:12615000-12620000	57.9616
chr1	12475000	12480000	chr1:12405000-12410000	3.64749
chr1	12475000	12480000	chr1:12445000-12450000	2.63852
chr1	12475000	12480000	chr1:12525000-12530000	3.6767
chr1	12475000	12480000	chr1:12605000-12610000	7.63155
chr1	12475000	12480000	chr1:12615000-12620000	69.7228
chr1	12485000	12490000	chr1:12615000-12620000	5.64208
chr1	12495000	12500000	chr1:12225000-12230000	2.09212
chr1	12495000	12500000	chr1:12615000-12620000	18.9689
chr1	12495000	12500000	chr1:13700000-13705000	3.137
chr1	12510000	12515000	chr1:12445000-12450000	2.73938
chr1	12510000	12515000	chr1:12615000-12620000	12.9041
chr1	12515000	12520000	chr1:12445000-12450000	2.00518
chr1	12515000	12520000	chr1:12615000-12620000	9.03353
chr1	12525000	12530000	chr1:12230000-12235000	3.88975
chr1	12525000	12530000	chr1:12405000-12410000	7.91188
chr1	12525000	12530000	chr1:12430000-12435000	2.60323
chr1	12525000	12530000	chr1:12445000-12450000	14.7527
chr1	12525000	12530000	chr1:12460000-12465000	2.59026
chr1	12525000	12530000	chr1:12475000-12480000	3.6767
chr1	12525000	12530000	chr1:12615000-12620000	22.5867
chr1	12540000	12545000	chr1:12445000-12450000	2.21271
chr1	12545000	12550000	chr1:12445000-12450000	4.57258
chr1	12545000	12550000	chr1:12615000-12620000	2.32405
chr1	12550000	12555000	chr1:12445000-12450000	9.47579
chr1	12570000	12575000	chr1:12445000-12450000	7.1379
chr1	12570000	12575000	chr1:12615000-12620000	2.05878
chr1	12600000	12605000	chr1:12445000-12450000	9.72469
chr1	12605000	12610000	chr1:12445000-12450000	13.2239
chr1	12605000	12610000	chr1:12470000-12475000	5.68503
chr1	12605000	12610000	chr1:12475000-12480000	7.63155
chr1	12615000	12620000	chr1:12015000-12020000	2.8338
chr1	12615000	12620000	chr1:12105000-12110000	5.05045
chr1	12615000	12620000	chr1:12110000-12115000	3.26051
chr1	12615000	12620000	chr1:12115000-12120000	4.25741
chr1	12615000	12620000	chr1:12120000-12125000	6.78611
chr1	12615000	12620000	chr1:12125000-12130000	9.19573
chr1	12615000	12620000	chr1:12165000-12170000	4.11491
chr1	12615000	12620000	chr1:12195000-12200000	2.91554
chr1	12615000	12620000	chr1:12200000-12205000	7.85147
chr1	12615000	12620000	chr1:12205000-12210000	7.09383
chr1	12615000	12620000	chr1:12210000-12215000	4.32759
chr1	12615000	12620000	chr1:12215000-12220000	18.9668
chr1	12615000	12620000	chr1:12220000-12225000	3.83256
chr1	12615000	12620000	chr1:12225000-12230000	20.5424
chr1	12615000	12620000	chr1:12230000-12235000	12.7298
chr1	12615000	12620000	chr1:12235000-12240000	10.0876
chr1	12615000	12620000	chr1:12250000-12255000	7.52415
chr1	12615000	12620000	chr1:12255000-12260000	6.53177
chr1	12615000	12620000	chr1:12260000-12265000	4.96432
chr1	12615000	12620000	chr1:12265000-12270000	43.7971
chr1	12615000	12620000	chr1:12270000-12275000	16.0538
chr1	12615000	12620000	chr1:12275000-12280000	9.19967
chr1	12615000	12620000	chr1:12280000-12285000	3.13062
chr1	12615000	12620000	chr1:12285000-12290000	9.46823
chr1	12615000	12620000	chr1:12290000-12295000	5.47894
chr1	12615000	12620000	chr1:12295000-12300000	4.10961
chr1	12615000	12620000	chr1:12305000-12310000	36.6085
chr1	12615000	12620000	chr1:12310000-12315000	36.2339
chr1	12615000	12620000	chr1:12315000-12320000	21.1979
chr1	12615000	12620000	chr1:12320000-12325000	17.6475
chr1	12615000	12620000	chr1:12325000-12330000	9.48329
chr1	12615000	12620000	chr1:12330000-12335000	9.44262
chr1	12615000	12620000	chr1:12335000-12340000	7.61214
chr1	12615000	12620000	chr1:12340000-12345000	2.62638
chr1	12615000	12620000	chr1:12350000-12355000	12.5614
chr1	12615000	12620000	chr1:12355000-12360000	3.96738
chr1	12615000	12620000	chr1:12365000-12370000	2.72245
chr1	12615000	12620000	chr1:12370000-12375000	13.9876
chr1	12615000	12620000	chr1:12385000-12390000	4.03309
chr1	12615000	12620000	chr1:12390000-12395000	5.41907
chr1	12615000	12620000	chr1:12405000-12410000	39.7648
chr1	12615000	12620000	chr1:12430000-12435000	15.4483
chr1	12615000	12620000	chr1:12435000-12440000	47.1554
chr1	12615000	12620000	chr1:12445000-12450000	138.105
chr1	12615000	12620000	chr1:12450000-12455000	43.4029
chr1	12615000	12620000	chr1:12460000-12465000	24.93
chr1	12615000	12620000	chr1:12470000-12475000	57.9616
chr1	12615000	12620000	chr1:12475000-12480000	69.7228
chr1	12615000	12620000	chr1:12485000-12490000	5.64208
chr1	12615000	12620000	chr1:12495000-12500000	18.9689
chr1	12615000	12620000	chr1:12510000-12515000	12.9041
chr1	12615000	12620000	chr1:12515000-12520000	9.03353
chr1	12615000	12620000	chr1:12525000-12530000	22.5867
chr1	12615000	12620000	chr1:12545000-12550000	2.32405
chr1	12615000	12620000	chr1:12570000-12575000	2.05878
chr1	13695000	13700000	chr1:13745000-13750000	3.02533
chr1	13695000	13700000	chr1:13805000-13810000	8.45469
chr1	13700000	13705000	chr1:12495000-12500000	3.137
chr1	13700000	13705000	chr1:13740000-13745000	9.82172
chr1	13700000	13705000	chr1:13745000-13750000	6.45488
chr1	13700000	13705000	chr1:13750000-13755000	7.0929
chr1	13700000	13705000	chr1:13790000-13795000	10.0491
chr1	13700000	13705000	chr1:13795000-13800000	2.64064
chr1	13700000	13705000	chr1:13800000-13805000	5.1881
chr1	13700000	13705000	chr1:13805000-13810000	11.6334
chr1	13700000	13705000	chr1:13830000-13835000	4.61605
chr1	13700000	13705000	chr1:14435000-14440000	2.42561
chr1	13715000	13720000	chr1:13745000-13750000	3.91507
chr1	13740000	13745000	chr1:13700000-13705000	9.82172
chr1	13745000	13750000	chr1:13695000-13700000	3.02533
chr1	13745000	13750000	chr1:13700000-13705000	6.45488
chr1	13745000	13750000	chr1:13715000-13720000	3.91507
chr1	13750000	13755000	chr1:13700000-13705000	7.0929
chr1	13790000	13795000	chr1:13700000-13705000	10.0491
chr1	13795000	13800000	chr1:13700000-13705000	2.64064
chr1	13800000	13805000	chr1:13700000-13705000	5.1881
chr1	13805000	13810000	chr1:13695000-13700000	8.45469
chr1	13805000	13810000	chr1:13700000-13705000	11.6334
chr1	13830000	13835000	chr1:13700000-13705000	4.61605
chr1	14325000	14330000	chr1:14435000-14440000	8.01244
chr1	14330000	14335000	chr1:14435000-14440000	2.0205
chr1	14335000	14340000	chr1:14435000-14440000	2.96827
chr1	14350000	14355000	chr1:14435000-14440000	2.69124
chr1	14435000	14440000	chr1:13700000-13705000	2.42561
chr1	14435000	14440000	chr1:14325000-14330000	8.01244
chr1	14435000	14440000	chr1:14330000-14335000	2.0205
chr1	14435000	14440000	chr1:14335000-14340000	2.96827
chr1	14435000	14440000	chr1:14350000-14355000	2.69124
chr1	14435000	14440000	chr1:14455000-14460000	10.4696
chr1	14435000	14440000	chr1:14460000-14465000	16.7201
chr1	14435000	14440000	chr1:14475000-14480000	5.96643
chr1	14435000	14440000	chr1:14530000-14535000	9.52543
chr1	14435000	14440000	chr1:14625000-14630000	8.81506
chr1	14435000	14440000	chr1:14775000-14780000	5.3128
chr1	14435000	14440000	chr1:15045000-15050000	8.98087
chr1	14435000	14440000	chr1:15150000-15155000	2.16317
chr1	14435000	14440000	chr1:15175000-15180000	2.05811
chr1	14435000	14440000	chr1:15260000-15265000	2.94428
chr1	14435000	14440000	chr1:15345000-15350000	2.74442
chr1	14455000	14460000	chr1:14435000-14440000	10.4696
chr1	14460000	14465000	chr1:14435000-14440000	16.7201
chr1	14475000	14480000	chr1:14435000-14440000	5.96643
chr1	14530000	14535000	chr1:14435000-14440000	9.52543
chr1	14625000	14630000	chr1:14435000-14440000	8.81506
chr1	14775000	14780000	chr1:14435000-14440000	5.3128
chr1	15045000	15050000	chr1:14435000-14440000	8.98087
chr1	15140000	15145000	chr1:15255000-15260000	2.3616
chr1	15150000	15155000	chr1:14435000-14440000	2.16317
chr1	15150000	15155000	chr1:15235000-15240000	3.10204
chr1	15150000	15155000	chr1:15255000-15260000	4.04806
chr1	15150000	15155000	chr1:15260000-15265000	5.66736
chr1	15150000	15155000	chr1:15270000-15275000	2.26136
chr1	15150000	15155000	chr1:15285000-15290000	3.34156
chr1	15150000	15155000	chr1:15410000-15415000	3.38797
chr1	15175000	15180000	chr1:14435000-14440000	2.05811
chr1	15215000	15220000	chr1:15255000-15260000	3.32135
chr1	15235000	15240000	chr1:15150000-15155000	3.10204
chr1	15255000	15260000	chr1:15140000-15145000	2.3616
chr1	15255000	15260000	chr1:15150000-15155000	4.04806
chr1	15255000	15260000	chr1:15215000-15220000	3.32135
chr1	15260000	15265000	chr1:14435000-14440000	2.94428
chr1	15260000	15265000	chr1:15150000-15155000	5.66736
chr1	15270000	15275000	chr1:15150000-15155000	2.26136
chr1	15285000	15290000	chr1:15150000-15155000	3.34156
chr1	15325000	15330000	chr1:15400000-15405000	2.82031
chr1	15325000	15330000	chr1:15410000-15415000	10.5819
chr1	15325000	15330000	chr1:15415000-15420000	4.91224
chr1	15325000	15330000	chr1:15420000-15425000	5.61621
chr1	15325000	15330000	chr1:15455000-15460000	2.20637
chr1	15345000	15350000	chr1:14435000-14440000	2.74442
chr1	15345000	15350000	chr1:15410000-15415000	4.82752
chr1	15345000	15350000	chr1:15415000-15420000	4.21562
chr1	15350000	15355000	chr1:15410000-15415000	6.96415
chr1	15370000	15375000	chr1:15410000-15415000	5.21729
chr1	15400000	15405000	chr1:15325000-15330000	2.82031
chr1	15410000	15415000	chr1:15150000-15155000	3.38797
chr1	15410000	15415000	chr1:15325000-15330000	10.5819
chr1	15410000	15415000	chr1:15345000-15350000	4.82752
chr1	15410000	15415000	chr1:15350000-15355000	6.96415
chr1	15410000	15415000	chr1:15370000-15375000	5.21729
chr1	15415000	15420000	chr1:15325000-15330000	4.91224
chr1	15415000	15420000	chr1:15345000-15350000	4.21562
chr1	15420000	15425000	chr1:15325000-15330000	5.61621
chr1	15455000	15460000	chr1:15325000-15330000	2.20637
chr1	15525000	15530000	chr1:15625000-15630000	3.15636
chr1	15525000	15530000	chr1:15740000-15745000	2.01972
chr1	15525000	15530000	chr1:15745000-15750000	2.77369
chr1	15525000	15530000	chr1:15760000-15765000	2.3982
chr1	15525000	15530000	chr1:15830000-15835000	3.81588
chr1	15540000	15545000	chr1:15590000-15595000	3.14824
chr1	15540000	15545000	chr1:15625000-15630000	3.35424
chr1	15540000	15545000	chr1:15685000-15690000	4.06943
chr1	15540000	15545000	chr1:15690000-15695000	2.26124
chr1	15540000	15545000	chr1:15705000-15710000	5.96837
chr1	15540000	15545000	chr1:15715000-15720000	5.74677
chr1	15540000	15545000	chr1:15740000-15745000	4.46178
chr1	15540000	15545000	chr1:15750000-15755000	2.6141
chr1	15540000	15545000	chr1:15755000-15760000	6.3102
chr1	15540000	15545000	chr1:15760000-15765000	2.30736
chr1	15590000	15595000	chr1:15540000-15545000	3.14824
chr1	15615000	15620000	chr1:15740000-15745000	2.44782
chr1	15625000	15630000	chr1:15525000-15530000	3.15636
chr1	15625000	15630000	chr1:15540000-15545000	3.35424
chr1	15625000	15630000	chr1:15715000-15720000	2.11771
chr1	15685000	15690000	chr1:15540000-15545000	4.06943
chr1	15690000	15695000	chr1:15540000-15545000	2.26124
chr1	15705000	15710000	chr1:15540000-15545000	5.96837
chr1	15715000	15720000	chr1:15540000-15545000	5.74677
chr1	15715000	15720000	chr1:15625000-15630000	2.11771
chr1	15740000	15745000	chr1:15525000-15530000	2.01972
chr1	15740000	15745000	chr1:15540000-15545000	4.46178
chr1	15740000	15745000	chr1:15615000-15620000	2.44782
chr1	15745000	15750000	chr1:15525000-15530000	2.77369
chr1	15750000	15755000	chr1:15540000-15545000	2.6141
chr1	15750000	15755000	chr1:16010000-16015000	3.6303
chr1	15755000	15760000	chr1:15540000-15545000	6.3102
chr1	15755000	15760000	chr1:15975000-15980000	3.36613
chr1	15755000	15760000	chr1:16010000-16015000	3.59468
chr1	15760000	15765000	chr1:15525000-15530000	2.3982
chr1	15760000	15765000	chr1:15540000-15545000	2.30736
chr1	15760000	15765000	chr1:15975000-15980000	2.07171
chr1	15760000	15765000	chr1:16010000-16015000	3.02341
chr1	15795000	15800000	chr1:15830000-15835000	2.12541
chr1	15795000	15800000	chr1:15950000-15955000	4.59832
chr1	15795000	15800000	chr1:15975000-15980000	5.66685
chr1	15795000	15800000	chr1:16010000-16015000	2.05017
chr1	15795000	15800000	chr1:16145000-16150000	3.199
chr1	15830000	15835000	chr1:15525000-15530000	3.81588
chr1	15830000	15835000	chr1:15795000-15800000	2.12541
chr1	15830000	15835000	chr1:15855000-15860000	2.51828
chr1	15830000	15835000	chr1:15870000-15875000	3.25968
chr1	15830000	15835000	chr1:15875000-15880000	14.9342
chr1	15830000	15835000	chr1:15885000-15890000	2.12657
chr1	15830000	15835000	chr1:15890000-15895000	10.7686
chr1	15830000	15835000	chr1:15950000-15955000	4.93746
chr1	15830000	15835000	chr1:15970000-15975000	3.42005
chr1	15830000	15835000	chr1:16015000-16020000	2.87166
chr1	15830000	15835000	chr1:16035000-16040000	4.87744
chr1	15830000	15835000	chr1:16060000-16065000	2.74115
chr1	15830000	15835000	chr1:16205000-16210000	2.07445
chr1	15830000	15835000	chr1:16510000-16515000	2.74234
chr1	15835000	15840000	chr1:15885000-15890000	4.15516
chr1	15845000	15850000	chr1:15875000-15880000	3.55445
chr1	15845000	15850000	chr1:15890000-15895000	2.3859
chr1	15845000	15850000	chr1:15970000-15975000	3.09922
chr1	15855000	15860000	chr1:15830000-15835000	2.51828
chr1	15870000	15875000	chr1:15830000-15835000	3.25968
chr1	15875000	15880000	chr1:15830000-15835000	14.9342
chr1	15875000	15880000	chr1:15845000-15850000	3.55445
chr1	15885000	15890000	chr1:15830000-15835000	2.12657
chr1	15885000	15890000	chr1:15835000-15840000	4.15516
chr1	15890000	15895000	chr1:15830000-15835000	10.7686
chr1	15890000	15895000	chr1:15845000-15850000	2.3859
chr1	15950000	15955000	chr1:15795000-15800000	4.59832
chr1	15950000	15955000	chr1:15830000-15835000	4.93746
chr1	15970000	15975000	chr1:15830000-15835000	3.42005
chr1	15970000	15975000	chr1:15845000-15850000	3.09922
chr1	15975000	15980000	chr1:15755000-15760000	3.36613
chr1	15975000	15980000	chr1:15760000-15765000	2.07171
chr1	15975000	15980000	chr1:15795000-15800000	5.66685
chr1	16010000	16015000	chr1:15750000-15755000	3.6303
chr1	16010000	16015000	chr1:15755000-15760000	3.59468
chr1	16010000	16015000	chr1:15760000-15765000	3.02341
chr1	16010000	16015000	chr1:15795000-15800000	2.05017
chr1	16010000	16015000	chr1:16030000-16035000	19.1966
chr1	16010000	16015000	chr1:16035000-16040000	13.9295
chr1	16010000	16015000	chr1:16045000-16050000	9.29097
chr1	16010000	16015000	chr1:16050000-16055000	17.7327
chr1	16010000	16015000	chr1:16055000-16060000	33.7484
chr1	16010000	16015000	chr1:16060000-16065000	15.2494
chr1	16010000	16015000	chr1:16180000-16185000	2.09009
chr1	16010000	16015000	chr1:16185000-16190000	8.10217
chr1	16010000	16015000	chr1:16205000-16210000	6.10822
chr1	16010000	16015000	chr1:16225000-16230000	3.68448
chr1	16010000	16015000	chr1:16235000-16240000	3.53155
chr1	16010000	16015000	chr1:16365000-16370000	2.42853
chr1	16015000	16020000	chr1:15830000-15835000	2.87166
chr1	16015000	16020000	chr1:16045000-16050000	6.12296
chr1	16015000	16020000	chr1:16050000-16055000	4.90004
chr1	16015000	16020000	chr1:16055000-16060000	7.61709
chr1	16015000	16020000	chr1:16205000-16210000	6.05429
chr1	16030000	16035000	chr1:16010000-16015000	19.1966
chr1	16035000	16040000	chr1:15830000-15835000	4.87744
chr1	16035000	16040000	chr1:16010000-16015000	13.9295
chr1	16035000	16040000	chr1:16055000-16060000	11.607
chr1	16045000	16050000	chr1:16010000-16015000	9.29097
chr1	16045000	16050000	chr1:16015000-16020000	6.12296
chr1	16045000	16050000	chr1:16205000-16210000	2.47623
chr1	16050000	16055000	chr1:16010000-16015000	17.7327
chr1	16050000	16055000	chr1:16015000-16020000	4.90004
chr1	16055000	16060000	chr1:16010000-16015000	33.7484
chr1	16055000	16060000	chr1:16015000-16020000	7.61709
chr1	16055000	16060000	chr1:16035000-16040000	11.607
chr1	16060000	16065000	chr1:15830000-15835000	2.74115
chr1	16060000	16065000	chr1:16010000-16015000	15.2494
chr1	16060000	16065000	chr1:16205000-16210000	3.51778
chr1	16060000	16065000	chr1:16365000-16370000	3.07841
chr1	16080000	16085000	chr1:16140000-16145000	3.57141
chr1	16080000	16085000	chr1:16145000-16150000	15.2115
chr1	16080000	16085000	chr1:16160000-16165000	8.62829
chr1	16080000	16085000	chr1:16170000-16175000	12.8996
chr1	16080000	16085000	chr1:16180000-16185000	7.67312
chr1	16080000	16085000	chr1:16185000-16190000	8.16124
chr1	16080000	16085000	chr1:16205000-16210000	4.65051
chr1	16080000	16085000	chr1:16235000-16240000	8.55959
chr1	16080000	16085000	chr1:16365000-16370000	3.53597
chr1	16090000	16095000	chr1:16140000-16145000	4.12745
chr1	16090000	16095000	chr1:16145000-16150000	15.453
chr1	16090000	16095000	chr1:16160000-16165000	5.78846
chr1	16090000	16095000	chr1:16235000-16240000	2.80958
chr1	16110000	16115000	chr1:16145000-16150000	4.70153
chr1	16110000	16115000	chr1:16160000-16165000	2.02107
chr1	16140000	16145000	chr1:16080000-16085000	3.57141
chr1	16140000	16145000	chr1:16090000-16095000	4.12745
chr1	16140000	16145000	chr1:16185000-16190000	5.06259
chr1	16145000	16150000	chr1:15795000-15800000	3.199
chr1	16145000	16150000	chr1:16080000-16085000	15.2115
chr1	16145000	16150000	chr1:16090000-16095000	15.453
chr1	16145000	16150000	chr1:16110000-16115000	4.70153
chr1	16145000	16150000	chr1:16170000-16175000	3.06265
chr1	16145000	16150000	chr1:16180000-16185000	13.7735
chr1	16145000	16150000	chr1:16185000-16190000	6.15427
chr1	16145000	16150000	chr1:16350000-16355000	2.09355
chr1	16145000	16150000	chr1:16365000-16370000	5.00624
chr1	16145000	16150000	chr1:16440000-16445000	2.07706
chr1	16160000	16165000	chr1:16080000-16085000	8.62829
chr1	16160000	16165000	chr1:16090000-16095000	5.78846
chr1	16160000	16165000	chr1:16110000-16115000	2.02107
chr1	16170000	16175000	chr1:16080000-16085000	12.8996
chr1	16170000	16175000	chr1:16145000-16150000	3.06265
chr1	16180000	16185000	chr1:16010000-16015000	2.09009
chr1	16180000	16185000	chr1:16080000-16085000	7.67312
chr1	16180000	16185000	chr1:16145000-16150000	13.7735
chr1	16185000	16190000	chr1:16010000-16015000	8.10217
chr1	16185000	16190000	chr1:16080000-16085000	8.16124
chr1	16185000	16190000	chr1:16140000-16145000	5.06259
chr1	16185000	16190000	chr1:16145000-16150000	6.15427
chr1	16205000	16210000	chr1:15830000-15835000	2.07445
chr1	16205000	16210000	chr1:16010000-16015000	6.10822
chr1	16205000	16210000	chr1:16015000-16020000	6.05429
chr1	16205000	16210000	chr1:16045000-16050000	2.47623
chr1	16205000	16210000	chr1:16060000-16065000	3.51778
chr1	16205000	16210000	chr1:16080000-16085000	4.65051
chr1	16205000	16210000	chr1:16225000-16230000	5.35506
chr1	16205000	16210000	chr1:16235000-16240000	17.357
chr1	16205000	16210000	chr1:16350000-16355000	14.3981
chr1	16205000	16210000	chr1:16365000-16370000	25.0209
chr1	16205000	16210000	chr1:16405000-16410000	3.67154
chr1	16205000	16210000	chr1:16430000-16435000	4.25725
chr1	16205000	16210000	chr1:16440000-16445000	4.32115
chr1	16215000	16220000	chr1:16235000-16240000	6.48351
chr1	16215000	16220000	chr1:16350000-16355000	2.77008
chr1	16215000	16220000	chr1:16365000-16370000	12.7115
chr1	16225000	16230000	chr1:16010000-16015000	3.68448
chr1	16225000	16230000	chr1:16205000-16210000	5.35506
chr1	16225000	16230000	chr1:16365000-16370000	4.47359
chr1	16235000	16240000	chr1:16010000-16015000	3.53155
chr1	16235000	16240000	chr1:16080000-16085000	8.55959
chr1	16235000	16240000	chr1:16090000-16095000	2.80958
chr1	16235000	16240000	chr1:16205000-16210000	17.357
chr1	16235000	16240000	chr1:16215000-16220000	6.48351
chr1	16235000	16240000	chr1:16350000-16355000	6.54589
chr1	16235000	16240000	chr1:16365000-16370000	5.92236
chr1	16350000	16355000	chr1:16145000-16150000	2.09355
chr1	16350000	16355000	chr1:16205000-16210000	14.3981
chr1	16350000	16355000	chr1:16215000-16220000	2.77008
chr1	16350000	16355000	chr1:16235000-16240000	6.54589
chr1	16365000	16370000	chr1:16010000-16015000	2.42853
chr1	16365000	16370000	chr1:16060000-16065000	3.07841
chr1	16365000	16370000	chr1:16080000-16085000	3.53597
chr1	16365000	16370000	chr1:16145000-16150000	5.00624
chr1	16365000	16370000	chr1:16205000-16210000	25.0209
chr1	16365000	16370000	chr1:16215000-16220000	12.7115
chr1	16365000	16370000	chr1:16225000-16230000	4.47359
chr1	16365000	16370000	chr1:16235000-16240000	5.92236
chr1	16365000	16370000	chr1:16405000-16410000	2.33694
chr1	16365000	16370000	chr1:16410000-16415000	2.67699
chr1	16365000	16370000	chr1:16420000-16425000	2.39848
chr1	16365000	16370000	chr1:16425000-16430000	8.02743
chr1	16365000	16370000	chr1:16430000-16435000	5.64532
chr1	16365000	16370000	chr1:16440000-16445000	8.45973
chr1	16375000	16380000	chr1:16440000-16445000	2.19688
chr1	16405000	16410000	chr1:16205000-16210000	3.67154
chr1	16405000	16410000	chr1:16365000-16370000	2.33694
chr1	16405000	16410000	chr1:16440000-16445000	7.24672
chr1	16410000	16415000	chr1:16365000-16370000	2.67699
chr1	16410000	16415000	chr1:16440000-16445000	5.13431
chr1	16420000	16425000	chr1:16365000-16370000	2.39848
chr1	16425000	16430000	chr1:16365000-16370000	8.02743
chr1	16430000	16435000	chr1:16205000-16210000	4.25725
chr1	16430000	16435000	chr1:16365000-16370000	5.64532
chr1	16440000	16445000	chr1:16145000-16150000	2.07706
chr1	16440000	16445000	chr1:16205000-16210000	4.32115
chr1	16440000	16445000	chr1:16365000-16370000	8.45973
chr1	16440000	16445000	chr1:16375000-16380000	2.19688
chr1	16440000	16445000	chr1:16405000-16410000	7.24672
chr1	16440000	16445000	chr1:16410000-16415000	5.13431
chr1	16440000	16445000	chr1:16490000-16495000	2.05007
chr1	16440000	16445000	chr1:16565000-16570000	4.70155
chr1	16440000	16445000	chr1:16610000-16615000	4.05439
chr1	16490000	16495000	chr1:16440000-16445000	2.05007
chr1	16505000	16510000	chr1:16620000-16625000	3.32918
chr1	16505000	16510000	chr1:16630000-16635000	3.5233
chr1	16505000	16510000	chr1:16640000-16645000	19.3209
chr1	16505000	16510000	chr1:16645000-16650000	16.2707
chr1	16505000	16510000	chr1:16655000-16660000	8.28282
chr1	16505000	16510000	chr1:16710000-16715000	3.85512
chr1	16505000	16510000	chr1:16745000-16750000	10.488
chr1	16505000	16510000	chr1:16895000-16900000	5.96942
chr1	16505000	16510000	chr1:16900000-16905000	47.6453
chr1	16505000	16510000	chr1:16905000-16910000	2.00297
chr1	16510000	16515000	chr1:15830000-15835000	2.74234
chr1	16510000	16515000	chr1:16610000-16615000	11.8466
chr1	16510000	16515000	chr1:16620000-16625000	3.18987
chr1	16510000	16515000	chr1:16630000-16635000	3.56241
chr1	16510000	16515000	chr1:16640000-16645000	39.502
chr1	16510000	16515000	chr1:16645000-16650000	7.8109
chr1	16510000	16515000	chr1:16650000-16655000	5.31399
chr1	16510000	16515000	chr1:16710000-16715000	4.31768
chr1	16510000	16515000	chr1:16715000-16720000	20.1681
chr1	16510000	16515000	chr1:16725000-16730000	5.44592
chr1	16510000	16515000	chr1:16730000-16735000	3.13751
chr1	16510000	16515000	chr1:16865000-16870000	2.02455
chr1	16510000	16515000	chr1:16895000-16900000	21.2068
chr1	16510000	16515000	chr1:16900000-16905000	7.95059
chr1	16510000	16515000	chr1:16905000-16910000	3.75131
chr1	16515000	16520000	chr1:16640000-16645000	3.96157
chr1	16515000	16520000	chr1:16895000-16900000	6.86886
chr1	16535000	16540000	chr1:16730000-16735000	3.13963
chr1	16535000	16540000	chr1:16865000-16870000	10.9566
chr1	16535000	16540000	chr1:16870000-16875000	4.12842
chr1	16540000	16545000	chr1:16640000-16645000	9.10205
chr1	16540000	16545000	chr1:16670000-16675000	10.2765
chr1	16540000	16545000	chr1:16675000-16680000	8.49164
chr1	16540000	16545000	chr1:16865000-16870000	15.4815
chr1	16560000	16565000	chr1:16865000-16870000	3.19181
chr1	16560000	16565000	chr1:16895000-16900000	4.60737
chr1	16565000	16570000	chr1:16440000-16445000	4.70155
chr1	16565000	16570000	chr1:16610000-16615000	2.3597
chr1	16565000	16570000	chr1:16640000-16645000	18.7219
chr1	16565000	16570000	chr1:16685000-16690000	2.89092
chr1	16565000	16570000	chr1:16705000-16710000	2.03009
chr1	16565000	16570000	chr1:16855000-16860000	2.49018
chr1	16565000	16570000	chr1:16865000-16870000	15.5868
chr1	16565000	16570000	chr1:16895000-16900000	12.7644
chr1	16565000	16570000	chr1:16900000-16905000	9.64385
chr1	16590000	16595000	chr1:16865000-16870000	3.12942
chr1	16590000	16595000	chr1:16895000-16900000	3.06642
chr1	16590000	16595000	chr1:16900000-16905000	8.59848
chr1	16595000	16600000	chr1:16865000-16870000	2.94959
chr1	16595000	16600000	chr1:16895000-16900000	8.73525
chr1	16600000	16605000	chr1:16640000-16645000	3.73037
chr1	16600000	16605000	chr1:16865000-16870000	4.05627
chr1	16600000	16605000	chr1:16880000-16885000	2.01086
chr1	16600000	16605000	chr1:16895000-16900000	7.61293
chr1	16600000	16605000	chr1:16900000-16905000	10.2452
chr1	16605000	16610000	chr1:16895000-16900000	3.13067
chr1	16610000	16615000	chr1:16440000-16445000	4.05439
chr1	16610000	16615000	chr1:16510000-16515000	11.8466
chr1	16610000	16615000	chr1:16565000-16570000	2.3597
chr1	16610000	16615000	chr1:16865000-16870000	7.9175
chr1	16610000	16615000	chr1:16895000-16900000	21.9809
chr1	16610000	16615000	chr1:16900000-16905000	10.7052
chr1	16610000	16615000	chr1:16905000-16910000	2.07553
chr1	16610000	16615000	chr1:16910000-16915000	4.60515
chr1	16610000	16615000	chr1:17010000-17015000	5.22764
chr1	16615000	16620000	chr1:16895000-16900000	4.82085
chr1	16615000	16620000	chr1:16900000-16905000	2.79173
chr1	16620000	16625000	chr1:16505000-16510000	3.32918
chr1	16620000	16625000	chr1:16510000-16515000	3.18987
chr1	16620000	16625000	chr1:16640000-16645000	3.45357
chr1	16620000	16625000	chr1:16715000-16720000	3.51589
chr1	16620000	16625000	chr1:16895000-16900000	22.0552
chr1	16620000	16625000	chr1:16900000-16905000	20.054
chr1	16620000	16625000	chr1:16905000-16910000	3.27842
chr1	16620000	16625000	chr1:16910000-16915000	4.42814
chr1	16620000	16625000	chr1:16945000-16950000	11.342
chr1	16630000	16635000	chr1:16505000-16510000	3.5233
chr1	16630000	16635000	chr1:16510000-16515000	3.56241
chr1	16630000	16635000	chr1:16895000-16900000	5.3766
chr1	16630000	16635000	chr1:16900000-16905000	3.22149
chr1	16640000	16645000	chr1:16505000-16510000	19.3209
chr1	16640000	16645000	chr1:16510000-16515000	39.502
chr1	16640000	16645000	chr1:16515000-16520000	3.96157
chr1	16640000	16645000	chr1:16540000-16545000	9.10205
chr1	16640000	16645000	chr1:16565000-16570000	18.7219
chr1	16640000	16645000	chr1:16600000-16605000	3.73037
chr1	16640000	16645000	chr1:16620000-16625000	3.45357
chr1	16640000	16645000	chr1:16705000-16710000	5.95803
chr1	16640000	16645000	chr1:16710000-16715000	8.72532
chr1	16640000	16645000	chr1:16715000-16720000	13.6369
chr1	16640000	16645000	chr1:16725000-16730000	4.69187
chr1	16640000	16645000	chr1:16755000-16760000	22.4196
chr1	16640000	16645000	chr1:16760000-16765000	43.9285
chr1	16640000	16645000	chr1:16865000-16870000	3.83244
chr1	16640000	16645000	chr1:16875000-16880000	2.14695
chr1	16640000	16645000	chr1:16895000-16900000	17.2028
chr1	16640000	16645000	chr1:16900000-16905000	23.8857
chr1	16640000	16645000	chr1:16905000-16910000	3.22856
chr1	16640000	16645000	chr1:16910000-16915000	2.60115
chr1	16640000	16645000	chr1:16915000-16920000	3.23783
chr1	16640000	16645000	chr1:16920000-16925000	7.38151
chr1	16640000	16645000	chr1:16930000-16935000	3.7087
chr1	16640000	16645000	chr1:16935000-16940000	6.52232
chr1	16640000	16645000	chr1:16945000-16950000	5.71876
chr1	16640000	16645000	chr1:17010000-17015000	5.64454
chr1	16640000	16645000	chr1:17050000-17055000	4.21727
chr1	16645000	16650000	chr1:16505000-16510000	16.2707
chr1	16645000	16650000	chr1:16510000-16515000	7.8109
chr1	16645000	16650000	chr1:16715000-16720000	3.26261
chr1	16645000	16650000	chr1:16755000-16760000	26.3738
chr1	16645000	16650000	chr1:16760000-16765000	64.604
chr1	16650000	16655000	chr1:16510000-16515000	5.31399
chr1	16650000	16655000	chr1:16755000-16760000	3.62059
chr1	16650000	16655000	chr1:16895000-16900000	2.1237
chr1	16655000	16660000	chr1:16505000-16510000	8.28282
chr1	16670000	16675000	chr1:16540000-16545000	10.2765
chr1	16670000	16675000	chr1:16730000-16735000	14.5993
chr1	16675000	16680000	chr1:16540000-16545000	8.49164
chr1	16675000	16680000	chr1:16725000-16730000	2.08158
chr1	16680000	16685000	chr1:16855000-16860000	7.0903
chr1	16685000	16690000	chr1:16565000-16570000	2.89092
chr1	16705000	16710000	chr1:16565000-16570000	2.03009
chr1	16705000	16710000	chr1:16640000-16645000	5.95803
chr1	16705000	16710000	chr1:16895000-16900000	2.34998
chr1	16710000	16715000	chr1:16505000-16510000	3.85512
chr1	16710000	16715000	chr1:16510000-16515000	4.31768
chr1	16710000	16715000	chr1:16640000-16645000	8.72532
chr1	16715000	16720000	chr1:16510000-16515000	20.1681
chr1	16715000	16720000	chr1:16620000-16625000	3.51589
chr1	16715000	16720000	chr1:16640000-16645000	13.6369
chr1	16715000	16720000	chr1:16645000-16650000	3.26261
chr1	16715000	16720000	chr1:16865000-16870000	3.90797
chr1	16715000	16720000	chr1:16900000-16905000	3.6693
chr1	16725000	16730000	chr1:16510000-16515000	5.44592
chr1	16725000	16730000	chr1:16640000-16645000	4.69187
chr1	16725000	16730000	chr1:16675000-16680000	2.08158
chr1	16730000	16735000	chr1:16510000-16515000	3.13751
chr1	16730000	16735000	chr1:16535000-16540000	3.13963
chr1	16730000	16735000	chr1:16670000-16675000	14.5993
chr1	16730000	16735000	chr1:16865000-16870000	4.19562
chr1	16745000	16750000	chr1:16505000-16510000	10.488
chr1	16755000	16760000	chr1:16640000-16645000	22.4196
chr1	16755000	16760000	chr1:16645000-16650000	26.3738
chr1	16755000	16760000	chr1:16650000-16655000	3.62059
chr1	16760000	16765000	chr1:16640000-16645000	43.9285
chr1	16760000	16765000	chr1:16645000-16650000	64.604
chr1	16855000	16860000	chr1:16565000-16570000	2.49018
chr1	16855000	16860000	chr1:16680000-16685000	7.0903
chr1	16865000	16870000	chr1:16510000-16515000	2.02455
chr1	16865000	16870000	chr1:16535000-16540000	10.9566
chr1	16865000	16870000	chr1:16540000-16545000	15.4815
chr1	16865000	16870000	chr1:16560000-16565000	3.19181
chr1	16865000	16870000	chr1:16565000-16570000	15.5868
chr1	16865000	16870000	chr1:16590000-16595000	3.12942
chr1	16865000	16870000	chr1:16595000-16600000	2.94959
chr1	16865000	16870000	chr1:16600000-16605000	4.05627
chr1	16865000	16870000	chr1:16610000-16615000	7.9175
chr1	16865000	16870000	chr1:16640000-16645000	3.83244
chr1	16865000	16870000	chr1:16715000-16720000	3.90797
chr1	16865000	16870000	chr1:16730000-16735000	4.19562
chr1	16870000	16875000	chr1:16535000-16540000	4.12842
chr1	16875000	16880000	chr1:16640000-16645000	2.14695
chr1	16880000	16885000	chr1:16600000-16605000	2.01086
chr1	16895000	16900000	chr1:16505000-16510000	5.96942
chr1	16895000	16900000	chr1:16510000-16515000	21.2068
chr1	16895000	16900000	chr1:16515000-16520000	6.86886
chr1	16895000	16900000	chr1:16560000-16565000	4.60737
chr1	16895000	16900000	chr1:16565000-16570000	12.7644
chr1	16895000	16900000	chr1:16590000-16595000	3.06642
chr1	16895000	16900000	chr1:16595000-16600000	8.73525
chr1	16895000	16900000	chr1:16600000-16605000	7.61293
chr1	16895000	16900000	chr1:16605000-16610000	3.13067
chr1	16895000	16900000	chr1:16610000-16615000	21.9809
chr1	16895000	16900000	chr1:16615000-16620000	4.82085
chr1	16895000	16900000	chr1:16620000-16625000	22.0552
chr1	16895000	16900000	chr1:16630000-16635000	5.3766
chr1	16895000	16900000	chr1:16640000-16645000	17.2028
chr1	16895000	16900000	chr1:16650000-16655000	2.1237
chr1	16895000	16900000	chr1:16705000-16710000	2.34998
chr1	16900000	16905000	chr1:16505000-16510000	47.6453
chr1	16900000	16905000	chr1:16510000-16515000	7.95059
chr1	16900000	16905000	chr1:16565000-16570000	9.64385
chr1	16900000	16905000	chr1:16590000-16595000	8.59848
chr1	16900000	16905000	chr1:16600000-16605000	10.2452
chr1	16900000	16905000	chr1:16610000-16615000	10.7052
chr1	16900000	16905000	chr1:16615000-16620000	2.79173
chr1	16900000	16905000	chr1:16620000-16625000	20.054
chr1	16900000	16905000	chr1:16630000-16635000	3.22149
chr1	16900000	16905000	chr1:16640000-16645000	23.8857
chr1	16900000	16905000	chr1:16715000-16720000	3.6693
[truncated: 317,394+ more rows]
