# Supplementary material for: A scalable computational framework for predicting gene expression from candidate cis -regulatory elements
Source: HighWire-hosted journal article supplement (doi:10.1101/gr.281219.125), 2026-01-16
Supplement: Supplemental_Table_S7.xlsx [file Supplemental_Table_S7.xlsx]

## Sheet: Supplemental_Table_S7
K562 enhancer-gene data from CRISPR perturbation-based experiments
chr	start	end	class	Gene	Gene TSS	Cell type	Significant
chr1	1134850	1135934	ENSG00000008130	NADK	1778470	K562	TRUE
chr1	12038249	12039371	ENSG00000116691	MIIP	12019466	K562	TRUE
chr1	25933356	25934013	ENSG00000169442	CD52	26317958	K562	TRUE
chr1	26378038	26378931	ENSG00000131914	LIN28A	26410817	K562	TRUE
chr1	26508576	26508796	ENSG00000131914	LIN28A	26410817	K562	TRUE
chr1	27867113	27867634	ENSG00000130775	THEMIS2	27872543	K562	TRUE
chr1	28883748	28884318	ENSG00000159023	EPB41	28887091	K562	TRUE
chr1	28884562	28885466	ENSG00000159023	EPB41	28887091	K562	TRUE
chr1	30777481	30778146	ENSG00000162511	LAPTM5	30757774	K562	TRUE
chr1	30779460	30779984	ENSG00000162510	MATN1	30723585	K562	TRUE
chr1	36743833	36743965	ENSG00000134698	AGO4	35808016	K562	TRUE
chr1	38527394	38527597	ENSG00000185090	MANEAL	37793802	K562	TRUE
chr1	46522176	46523248	ENSG00000197587	DMBX1	46489836	K562	TRUE
chr1	46536042	46536138	ENSG00000085999	RAD54L	46246461	K562	TRUE
chr1	50978763	50979272	ENSG00000123080	CDKN2C	50960745	K562	TRUE
chr1	67682610	67683102	ENSG00000116717	GADD45A	67685201	K562	TRUE
chr1	70674898	70676314	ENSG00000050628	PTGER3	71047788	K562	TRUE
chr1	95084409	95085129	ENSG00000152078	TLCD4	95117355	K562	TRUE
chr1	95085196	95085844	ENSG00000152078	TLCD4	95117355	K562	TRUE
chr1	95087022	95087486	ENSG00000152078	TLCD4	95117355	K562	TRUE
chr1	95111053	95111329	ENSG00000152078	TLCD4	95117355	K562	TRUE
chr1	95113739	95113968	ENSG00000152078	TLCD4	95117355	K562	TRUE
chr1	95115580	95116107	ENSG00000152078	TLCD4	95117355	K562	TRUE
chr1	108533625	108534200	ENSG00000162636	FAM102B	108560089	K562	TRUE
chr1	109889137	109889561	ENSG00000031698	SARS1	109213918	K562	TRUE
chr1	113140526	113141426	ENSG00000081026	MAGI3	113390749	K562	TRUE
chr1	116503160	116503212	ENSG00000116815	CD58	116571026	K562	TRUE
chr1	116503941	116504922	ENSG00000116815	CD58	116571026	K562	TRUE
chr1	116687162	116688033	ENSG00000143061	IGSF3	116667733	K562	TRUE
chr1	116687162	116688033	ENSG00000116830	TTF2	117060326	K562	TRUE
chr1	150186818	150187104	ENSG00000136631	VPS45	150067279	K562	TRUE
chr1	150545401	150546120	ENSG00000143382	ADAMTSL4	150549369	K562	TRUE
chr1	150976845	150977758	ENSG00000143418	CERS2	150967631	K562	TRUE
chr1	151596242	151596992	ENSG00000163191	S100A11	152037004	K562	TRUE
chr1	153434883	153435412	ENSG00000163218	PGLYRP4	153348841	K562	TRUE
chr1	153532229	153532556	ENSG00000197956	S100A6	153536215	K562	TRUE
chr1	156398463	156398757	ENSG00000125462	MIR9-1HG	156417439	K562	TRUE
chr1	157274686	157275184	ENSG00000143303	METTL25B	156728442	K562	TRUE
chr1	158689136	158689433	ENSG00000163554	SPTA1	158686715	K562	TRUE
chr1	158691931	158692260	ENSG00000163554	SPTA1	158686715	K562	TRUE
chr1	159790291	159790668	ENSG00000158716	DUSP23	159780932	K562	TRUE
chr1	161503006	161503327	ENSG00000143226	FCGR2A	161505430	K562	TRUE
chr1	168218810	168218977	ENSG00000143158	MPC2	167936040	K562	TRUE
chr1	173670896	173671479	ENSG00000183831	ANKRD45	173669851	K562	TRUE
chr1	179016950	179017461	ENSG00000116199	FAM20B	179025804	K562	TRUE
chr1	180610412	180610898	ENSG00000143324	XPR1	180632022	K562	TRUE
chr1	181141427	181141976	ENSG00000162783	IER5	181088700	K562	TRUE
chr1	182337952	182338499	ENSG00000135821	GLUL	182391346	K562	TRUE
chr1	182339031	182339323	ENSG00000135821	GLUL	182391346	K562	TRUE
chr1	198633686	198634101	ENSG00000081237	PTPRC	198638457	K562	TRUE
chr1	201566849	201567635	ENSG00000134369	NAV1	201622927	K562	TRUE
chr1	202075983	202076422	ENSG00000163435	ELF3	202007945	K562	TRUE
chr1	202118782	202119349	ENSG00000163435	ELF3	202007945	K562	TRUE
chr1	203005703	203006052	ENSG00000163444	TMEM183A	203007374	K562	TRUE
chr1	203311685	203312280	ENSG00000159388	BTG2	203305491	K562	TRUE
chr1	207746401	207746696	ENSG00000117335	CD46	207752054	K562	TRUE
chr1	212430995	212431282	ENSG00000117691	NENF	212432920	K562	TRUE
chr1	213045207	213046165	ENSG00000136643	RPS6KC1	213051241	K562	TRUE
chr1	225444810	225445349	ENSG00000143815	LBR	225428038	K562	TRUE
chr1	225928238	225928890	ENSG00000143811	PYCR2	225924250	K562	TRUE
chr1	231046855	231047143	ENSG00000182118	FAM89A	231040254	K562	TRUE
chr1	231049365	231049644	ENSG00000182118	FAM89A	231040254	K562	TRUE
chr1	231053778	231053876	ENSG00000182118	FAM89A	231040254	K562	TRUE
chr1	231065595	231066065	ENSG00000182118	FAM89A	231040254	K562	TRUE
chr1	241806921	241807276	ENSG00000174371	EXO1	241847967	K562	TRUE
chr1	247855100	247855664	ENSG00000162722	TRIM58	247857187	K562	TRUE
chr1	248884984	248885196	ENSG00000171161	ZNF672	248838210	K562	TRUE
chr1	248889419	248889875	ENSG00000171161	ZNF672	248838210	K562	TRUE
chr10	3803500	3803667	ENSG00000067082	KLF6	3780217	K562	TRUE
chr10	3805919	3806186	ENSG00000067082	KLF6	3780217	K562	TRUE
chr10	3810115	3810460	ENSG00000067082	KLF6	3780217	K562	TRUE
chr10	4866679	4866954	ENSG00000187134	AKR1C1	4963253	K562	TRUE
chr10	4941458	4942029	ENSG00000187134	AKR1C1	4963253	K562	TRUE
chr10	4941458	4942029	ENSG00000151632	AKR1C2	5004023	K562	TRUE
chr10	5020233	5020590	ENSG00000187134	AKR1C1	4963253	K562	TRUE
chr10	5472357	5472608	ENSG00000173848	NET1	5412557	K562	TRUE
chr10	5479440	5480268	ENSG00000173848	NET1	5412557	K562	TRUE
chr10	11710630	11711089	ENSG00000148429	USP6NL	11611754	K562	TRUE
chr10	61779996	61780708	ENSG00000150347	ARID5B	61901699	K562	TRUE
chr10	70667107	70667762	ENSG00000138316	ADAMTS14	70672803	K562	TRUE
chr10	71860238	71861257	ENSG00000197746	PSAP	71851251	K562	TRUE
chr10	73991783	73992213	ENSG00000035403	VCL	73995193	K562	TRUE
chr10	73993230	73993513	ENSG00000035403	VCL	73995193	K562	TRUE
chr10	87500618	87501002	ENSG00000107789	MINPP1	87504893	K562	TRUE
chr10	92756203	92756884	ENSG00000152804	HHEX	92689955	K562	TRUE
chr10	92757047	92757539	ENSG00000152804	HHEX	92689955	K562	TRUE
chr10	95297343	95297926	ENSG00000107438	PDLIM1	95291003	K562	TRUE
chr10	96830646	96830845	ENSG00000196233	LCOR	96832254	K562	TRUE
chr10	103197122	103197603	ENSG00000076685	NT5C2	103193306	K562	TRUE
chr10	104339608	104341027	ENSG00000148841	ITPRIP	104338465	K562	TRUE
chr10	110857585	110857954	ENSG00000150593	PDCD4	110871928	K562	TRUE
chr10	117408947	117409305	ENSG00000165650	PDZD8	117375440	K562	TRUE
chr10	117411428	117411916	ENSG00000165650	PDZD8	117375440	K562	TRUE
chr11	350815	351291	ENSG00000185885	IFITM1	313506	K562	TRUE
chr11	2867156	2868924	ENSG00000129749	CHRNA10	3671384	K562	TRUE
chr11	4658741	4659286	ENSG00000244734	HBB	5227071	K562	TRUE
chr11	9551798	9552426	ENSG00000148926	ADM	10305073	K562	TRUE
chr11	33932885	33933034	ENSG00000135363	LMO2	33865151	K562	TRUE
chr11	33936971	33937718	ENSG00000135363	LMO2	33865151	K562	TRUE
chr11	33941545	33942142	ENSG00000135363	LMO2	33865151	K562	TRUE
chr11	33941545	33942142	ENSG00000121691	CAT	34438934	K562	TRUE
chr11	33944635	33945258	ENSG00000135363	LMO2	33865151	K562	TRUE
chr11	33944635	33945258	ENSG00000121691	CAT	34438934	K562	TRUE
chr11	33944635	33945258	ENSG00000149089	APIP	34890741	K562	TRUE
chr11	33944635	33945258	ENSG00000135372	NAT10	34105629	K562	TRUE
chr11	34371462	34371837	ENSG00000135363	LMO2	33865151	K562	TRUE
chr11	34618994	34619393	ENSG00000135363	LMO2	33865151	K562	TRUE
chr11	46243046	46243928	ENSG00000110492	MDK	46380756	K562	TRUE
chr11	46247600	46247944	ENSG00000110492	MDK	46380756	K562	TRUE
chr11	60193683	60193970	ENSG00000166902	MRPL16	59810778	K562	TRUE
chr11	61971606	61972365	ENSG00000167996	FTH1	61967631	K562	TRUE
chr11	63567185	63567712	ENSG00000176485	PLAAT3	63614469	K562	TRUE
chr11	64334935	64335630	ENSG00000168071	CCDC88B	64340204	K562	TRUE
chr11	64334935	64335630	ENSG00000149792	MRPL49	65122183	K562	TRUE
chr11	64472866	64473606	ENSG00000110046	ATG2A	64913395	K562	TRUE
chr11	64998115	64999253	ENSG00000168062	BATF2	64990273	K562	TRUE
chr11	65418122	65419496	ENSG00000110046	ATG2A	64913395	K562	TRUE
chr11	65421038	65421622	ENSG00000110046	ATG2A	64913395	K562	TRUE
chr11	65471949	65472508	ENSG00000110046	ATG2A	64913395	K562	TRUE
chr11	65479574	65479797	ENSG00000110046	ATG2A	64913395	K562	TRUE
chr11	65493891	65494133	ENSG00000110046	ATG2A	64913395	K562	TRUE
chr11	65903126	65903506	ENSG00000175592	FOSL1	65900388	K562	TRUE
chr11	65927872	65928437	ENSG00000175550	DRAP1	65919274	K562	TRUE
chr11	69401490	69402125	ENSG00000172927	MYEOV	69294151	K562	TRUE
chr11	69409828	69410587	ENSG00000172927	MYEOV	69294151	K562	TRUE
chr11	69409828	69410587	ENSG00000110092	CCND1	69641156	K562	TRUE
chr11	73779179	73780053	ENSG00000175581	MRPL48	73787872	K562	TRUE
chr11	75096735	75097250	ENSG00000171561	OR2AT4	75096876	K562	TRUE
chr11	75534224	75535410	ENSG00000149257	SERPINH1	75562056	K562	TRUE
chr11	75558244	75558474	ENSG00000149257	SERPINH1	75562056	K562	TRUE
chr11	75558947	75559797	ENSG00000149257	SERPINH1	75562056	K562	TRUE
chr11	76224432	76224639	ENSG00000182704	TSKU	76782251	K562	TRUE
chr11	76823408	76824638	ENSG00000182704	TSKU	76782251	K562	TRUE
chr11	77644627	77644860	ENSG00000074201	CLNS1A	77619695	K562	TRUE
chr11	86134612	86135095	ENSG00000073921	PICALM	86069059	K562	TRUE
chr11	86134612	86135095	ENSG00000150687	PRSS23	86791059	K562	TRUE
chr11	86143593	86143975	ENSG00000073921	PICALM	86069059	K562	TRUE
chr11	86148519	86148569	ENSG00000073921	PICALM	86069059	K562	TRUE
chr11	86151265	86151775	ENSG00000073921	PICALM	86069059	K562	TRUE
chr11	86151265	86151775	ENSG00000074266	EED	86244753	K562	TRUE
chr11	86174478	86174975	ENSG00000073921	PICALM	86069059	K562	TRUE
chr11	86176171	86176880	ENSG00000073921	PICALM	86069059	K562	TRUE
chr11	86183783	86184057	ENSG00000073921	PICALM	86069059	K562	TRUE
chr11	88357548	88357753	ENSG00000109861	CTSC	88337725	K562	TRUE
chr11	88421538	88421913	ENSG00000109861	CTSC	88337725	K562	TRUE
chr11	95147309	95147939	ENSG00000149218	ENDOD1	95089846	K562	TRUE
chr11	113613591	113613859	ENSG00000180425	C11orf71	114400417	K562	TRUE
chr11	118604652	118604847	ENSG00000019144	PHLDB1	118606440	K562	TRUE
chr11	125532671	125533144	ENSG00000149557	FEZ1	125592510	K562	TRUE
chr11	125552877	125553410	ENSG00000149557	FEZ1	125592510	K562	TRUE
chr11	125554042	125554308	ENSG00000149557	FEZ1	125592510	K562	TRUE
chr11	130006891	130007237	ENSG00000084234	APLP2	130068147	K562	TRUE
chr12	716495	716914	ENSG00000060237	WNK1	752579	K562	TRUE
chr12	4153422	4154015	ENSG00000118971	CCND2	4269771	K562	TRUE
chr12	6263832	6264518	ENSG00000010278	CD9	6199715	K562	TRUE
chr12	6612781	6614523	ENSG00000111642	CHD4	6607356	K562	TRUE
chr12	7938214	7938561	ENSG00000059804	SLC2A3	7936187	K562	TRUE
chr12	7959811	7959936	ENSG00000059804	SLC2A3	7936187	K562	TRUE
chr12	7960709	7961043	ENSG00000059804	SLC2A3	7936187	K562	TRUE
chr12	9740439	9740691	ENSG00000150045	KLRF1	9827481	K562	TRUE
chr12	9764660	9765179	ENSG00000110848	CD69	9760901	K562	TRUE
chr12	12353808	12354243	ENSG00000165714	BORCS5	12357079	K562	TRUE
chr12	12353808	12354243	ENSG00000111261	MANSC1	12350242	K562	TRUE
chr12	14257470	14258399	ENSG00000171681	ATF7IP	14365676	K562	TRUE
chr12	31732959	31733186	ENSG00000170456	DENND5B	31591136	K562	TRUE
chr12	33587874	33588742	ENSG00000110975	SYT10	33439819	K562	TRUE
chr12	50041510	50042398	ENSG00000167552	TUBA1A	49189080	K562	TRUE
chr12	50901497	50902266	ENSG00000050426	LETMD1	51047962	K562	TRUE
chr12	53421424	53421942	ENSG00000135409	AMHR2	53423855	K562	TRUE
chr12	56047104	56047478	ENSG00000257727	CNPY2	56311312	K562	TRUE
chr12	56991154	56991968	ENSG00000166863	TAC3	57016529	K562	TRUE
chr12	92379017	92379561	ENSG00000133639	BTG1	92145846	K562	TRUE
chr12	92403678	92404211	ENSG00000133639	BTG1	92145846	K562	TRUE
chr12	92404842	92405291	ENSG00000133639	BTG1	92145846	K562	TRUE
chr12	101854792	101855009	ENSG00000136048	DRAM1	101877580	K562	TRUE
chr12	101855262	101855938	ENSG00000136048	DRAM1	101877580	K562	TRUE
chr12	110079425	110080255	ENSG00000174456	C12orf76	110048555	K562	TRUE
chr12	110118384	110118655	ENSG00000174456	C12orf76	110048555	K562	TRUE
chr12	110807619	110807882	ENSG00000196850	PPTC7	110583318	K562	TRUE
chr12	116360815	116361351	ENSG00000123066	MED13L	116277693	K562	TRUE
chr12	124887120	124887569	ENSG00000073060	SCARB1	124863917	K562	TRUE
chr12	124921277	124921447	ENSG00000150991	UBC	124915348	K562	TRUE
chr13	25352137	25352750	ENSG00000139496	NUP58	25301625	K562	TRUE
chr13	42258821	42259086	ENSG00000023516	AKAP11	42272152	K562	TRUE
chr13	42259467	42259973	ENSG00000023516	AKAP11	42272152	K562	TRUE
chr13	110957266	110957829	ENSG00000088448	ANKRD10	110915069	K562	TRUE
chr14	20820336	20820919	ENSG00000129538	RNASE1	20802844	K562	TRUE
chr14	35369737	35370007	ENSG00000100906	NFKBIA	35404749	K562	TRUE
chr14	55102997	55103675	ENSG00000131981	LGALS3	55124110	K562	TRUE
chr14	75229743	75230298	ENSG00000119638	NEK9	75127048	K562	TRUE
chr14	91264382	91265017	ENSG00000119714	GPR68	91253925	K562	TRUE
chr14	91267523	91268552	ENSG00000119714	GPR68	91253925	K562	TRUE
chr14	91269430	91269708	ENSG00000119714	GPR68	91253925	K562	TRUE
chr14	95524109	95524511	ENSG00000182512	GLRX5	95533503	K562	TRUE
chr14	95545819	95546109	ENSG00000182512	GLRX5	95533503	K562	TRUE
chr14	103313664	103314107	ENSG00000100664	EIF5	103333544	K562	TRUE
chr15	51652106	51652686	ENSG00000140280	LYSMD2	51737655	K562	TRUE
chr15	51652106	51652686	ENSG00000104112	SCG3	51681492	K562	TRUE
chr15	51652106	51652686	ENSG00000128872	TMOD2	51751597	K562	TRUE
chr15	51672201	51672518	ENSG00000104112	SCG3	51681492	K562	TRUE
chr15	67882321	67882821	ENSG00000169018	FEM1B	68277745	K562	TRUE
chr15	72237105	72237225	ENSG00000067225	PKM	72204559	K562	TRUE
chr15	72237274	72237898	ENSG00000067225	PKM	72204559	K562	TRUE
chr15	72238033	72238119	ENSG00000067225	PKM	72204559	K562	TRUE
chr15	74392334	74392888	ENSG00000138623	SEMA7A	74433958	K562	TRUE
chr15	76313653	76314074	ENSG00000140374	ETFA	76311469	K562	TRUE
chr15	81944921	81945382	ENSG00000183496	MEX3B	82046018	K562	TRUE
chr15	88917826	88918059	ENSG00000140545	MFGE8	88913379	K562	TRUE
chr15	88918223	88918343	ENSG00000140545	MFGE8	88913379	K562	TRUE
chr15	88920610	88920875	ENSG00000140545	MFGE8	88913379	K562	TRUE
chr15	88985438	88986328	ENSG00000140545	MFGE8	88913379	K562	TRUE
chr15	88987086	88987305	ENSG00000140545	MFGE8	88913379	K562	TRUE
chr15	88987086	88987305	ENSG00000140511	HAPLN3	88895544	K562	TRUE
chr15	95931034	95931147	ENSG00000185551	NR2F2	96325938	K562	TRUE
chr16	142955	143473	ENSG00000130656	HBZ	142728	K562	TRUE
chr16	144857	145253	ENSG00000130656	HBZ	142728	K562	TRUE
chr16	2022608	2024297	ENSG00000183971	NPW	2009926	K562	TRUE
chr16	10323142	10323463	ENSG00000166669	ATF7IP2	10326434	K562	TRUE
chr16	10497694	10497882	ENSG00000166669	ATF7IP2	10326434	K562	TRUE
chr16	11231374	11231670	ENSG00000166669	ATF7IP2	10326434	K562	TRUE
chr16	12612606	12612985	ENSG00000103381	CPPED1	12803887	K562	TRUE
chr16	23803498	23803904	ENSG00000166501	PRKCB	23835983	K562	TRUE
chr16	23821870	23822373	ENSG00000166501	PRKCB	23835983	K562	TRUE
chr16	23826557	23826929	ENSG00000166501	PRKCB	23835983	K562	TRUE
chr16	29700398	29701000	ENSG00000090238	YPEL3	30094880	K562	TRUE
chr16	87871544	87871870	ENSG00000140941	MAP1LC3B	87383953	K562	TRUE
chr16	87871544	87871870	ENSG00000103257	SLC7A5	87863639	K562	TRUE
chr17	8304515	8304903	ENSG00000141504	SAT2	7627796	K562	TRUE
chr17	16398148	16399211	ENSG00000187688	TRPV2	16415571	K562	TRUE
chr17	27986770	27987326	ENSG00000087095	NLK	28041737	K562	TRUE
chr17	28865073	28866129	ENSG00000132589	FLOT2	28897652	K562	TRUE
chr17	28865073	28866129	ENSG00000167536	DHRS13	28903079	K562	TRUE
chr17	32897201	32897908	ENSG00000006042	TMEM98	32927910	K562	TRUE
chr17	32912205	32912916	ENSG00000006042	TMEM98	32927910	K562	TRUE
chr17	38867437	38868050	ENSG00000161395	PGAP3	39688057	K562	TRUE
chr17	40536090	40536964	ENSG00000141753	IGFBP4	40443450	K562	TRUE
chr17	41530004	41530856	ENSG00000171345	KRT19	41528308	K562	TRUE
chr17	41530004	41530856	ENSG00000173757	STAT5B	42276391	K562	TRUE
chr17	41547922	41548282	ENSG00000171345	KRT19	41528308	K562	TRUE
chr17	41792676	41793529	ENSG00000173801	JUP	41785155	K562	TRUE
chr17	42626388	42626737	ENSG00000184988	TMEM106A	43211835	K562	TRUE
chr17	44281594	44281887	ENSG00000004939	SLC4A1	44268135	K562	TRUE
chr17	44281594	44281887	ENSG00000013306	SLC25A39	44324870	K562	TRUE
chr17	44288278	44288897	ENSG00000013306	SLC25A39	44324870	K562	TRUE
chr17	44326570	44327247	ENSG00000013306	SLC25A39	44324870	K562	TRUE
chr17	47197770	47198193	ENSG00000198336	MYL4	47200446	K562	TRUE
chr17	47866749	47867551	ENSG00000189120	SP6	47855874	K562	TRUE
chr17	47877508	47878085	ENSG00000189120	SP6	47855874	K562	TRUE
chr17	49860164	49860566	ENSG00000167085	PHB	49414802	K562	TRUE
chr17	49860164	49860566	ENSG00000108829	LRRC59	50385134	K562	TRUE
chr17	50153560	50154596	ENSG00000108819	PPP1R9B	50150677	K562	TRUE
chr17	55737883	55738579	ENSG00000141179	PCTP	55751051	K562	TRUE
chr17	63844287	63844676	ENSG00000198909	MAP3K3	63622415	K562	TRUE
chr17	63844287	63844676	ENSG00000108604	SMARCD2	63842685	K562	TRUE
chr17	64024166	64024603	ENSG00000108622	ICAM2	64020625	K562	TRUE
chr17	64025705	64026150	ENSG00000108622	ICAM2	64020625	K562	TRUE
chr17	66296187	66296627	ENSG00000154229	PRKCA	66302636	K562	TRUE
chr17	74875409	74875480	ENSG00000161513	FDXR	74873013	K562	TRUE
chr17	78256557	78257015	ENSG00000184557	SOCS3	78360077	K562	TRUE
chr17	78258515	78259103	ENSG00000184557	SOCS3	78360077	K562	TRUE
chr17	78785058	78785477	ENSG00000108669	CYTH1	78717025	K562	TRUE
chr17	80254661	80255197	ENSG00000181045	SLC26A11	80219699	K562	TRUE
chr17	80254661	80255197	ENSG00000173821	RNF213	80260866	K562	TRUE
chr17	80257264	80257484	ENSG00000173821	RNF213	80260866	K562	TRUE
chr17	81302439	81302637	ENSG00000185624	P4HB	81860535	K562	TRUE
chr17	81484183	81484980	ENSG00000169750	RAC3	82031678	K562	TRUE
chr18	3340697	3340991	ENSG00000177426	TGIF1	3411608	K562	TRUE
chr18	9869718	9870320	ENSG00000168461	RAB31	9708301	K562	TRUE
chr18	9876909	9877726	ENSG00000168461	RAB31	9708301	K562	TRUE
chr18	11947159	11947946	ENSG00000141401	IMPA2	11981025	K562	TRUE
chr18	50425055	50425675	ENSG00000154839	SKA1	50375046	K562	TRUE
chr18	58041619	58042031	ENSG00000049759	NEDD4L	58044226	K562	TRUE
chr18	74480039	74480717	ENSG00000187773	DIPK1C	74457268	K562	TRUE
chr19	555762	557000	ENSG00000172270	BSG	571277	K562	TRUE
chr19	791198	792268	ENSG00000065268	WDR18	984345	K562	TRUE
chr19	792566	792715	ENSG00000011304	PTBP1	797075	K562	TRUE
chr19	1546147	1546547	ENSG00000167476	JSRP1	2256417	K562	TRUE
chr19	2059424	2060264	ENSG00000071626	DAZAP1	1407569	K562	TRUE
chr19	2059424	2060264	ENSG00000071655	MBD3	1592801	K562	TRUE
chr19	2059424	2060264	ENSG00000099875	MKNK2	2041842	K562	TRUE
chr19	2059424	2060264	ENSG00000141873	SLC39A3	2740017	K562	TRUE
chr19	2060951	2061950	ENSG00000099875	MKNK2	2041842	K562	TRUE
chr19	4870081	4870567	ENSG00000105355	PLIN3	4867667	K562	TRUE
chr19	6504710	6505187	ENSG00000104833	TUBB4A	6502309	K562	TRUE
chr19	10027519	10028176	ENSG00000197961	ZNF121	9584497	K562	TRUE
chr19	10299442	10300274	ENSG00000105376	ICAM5	10289952	K562	TRUE
chr19	10299442	10300274	ENSG00000076662	ICAM3	10339624	K562	TRUE
chr19	11694005	11694149	ENSG00000196757	ZNF700	11925107	K562	TRUE
chr19	13841816	13843324	ENSG00000104907	TRMT1	13116649	K562	TRUE
chr19	14023516	14023915	ENSG00000123159	GIPC1	14496127	K562	TRUE
chr19	14786303	14786754	ENSG00000132002	DNAJB1	14517569	K562	TRUE
chr19	17398976	17399540	ENSG00000130303	BST2	17405630	K562	TRUE
chr19	18290279	18290647	ENSG00000130522	JUND	18281622	K562	TRUE
chr19	18291227	18293782	ENSG00000130522	JUND	18281622	K562	TRUE
chr19	18301050	18301469	ENSG00000105642	KCNN1	17951293	K562	TRUE
chr19	18301050	18301469	ENSG00000105655	ISYNA1	18438111	K562	TRUE
chr19	18414473	18415928	ENSG00000130511	SSBP4	18418864	K562	TRUE
chr19	21128818	21129149	ENSG00000196705	ZNF431	21142024	K562	TRUE
chr19	35380312	35380941	ENSG00000161249	DMKN	35497933	K562	TRUE
chr19	39258224	39258969	ENSG00000104835	SARS2	38916046	K562	TRUE
chr19	40435302	40435566	ENSG00000090932	DLL3	39498895	K562	TRUE
chr19	43782739	43783205	ENSG00000104783	KCNN4	43768977	K562	TRUE
chr19	43785206	43785653	ENSG00000104783	KCNN4	43768977	K562	TRUE
chr19	47243954	47244605	ENSG00000105327	BBC3	47222568	K562	TRUE
chr19	47278396	47278533	ENSG00000257704	INAFM1	47274885	K562	TRUE
chr19	48878485	48879097	ENSG00000087086	FTL	48965309	K562	TRUE
chr19	49717418	49717953	ENSG00000104946	TBC1D17	49877702	K562	TRUE
chr19	50602979	50603146	ENSG00000169136	ATF5	49928702	K562	TRUE
chr19	50728152	50728871	ENSG00000105472	CLEC11A	50723364	K562	TRUE
chr19	55372159	55373156	ENSG00000108106	UBE2S	55407788	K562	TRUE
chr19	56186901	56187499	ENSG00000018869	ZNF582	56393478	K562	TRUE
chr2	8525030	8526751	ENSG00000115738	ID2	8678845	K562	TRUE
chr2	8534651	8535653	ENSG00000115738	ID2	8678845	K562	TRUE
chr2	8535776	8537768	ENSG00000115738	ID2	8678845	K562	TRUE
chr2	8535776	8537768	ENSG00000143797	MBOAT2	9003684	K562	TRUE
chr2	10297812	10298424	ENSG00000115756	HPCAL1	10302889	K562	TRUE
chr2	12705675	12706154	ENSG00000071575	TRIB2	12716889	K562	TRUE
chr2	24457758	24458115	ENSG00000084676	NCOA1	24491914	K562	TRUE
chr2	37561517	37562113	ENSG00000163171	CDC42EP3	37672535	K562	TRUE
chr2	37562271	37562629	ENSG00000163171	CDC42EP3	37672535	K562	TRUE
chr2	38643689	38644201	ENSG00000143891	GALM	38666114	K562	TRUE
chr2	38643689	38644201	ENSG00000143889	HNRNPLL	38602928	K562	TRUE
chr2	38654143	38654816	ENSG00000143891	GALM	38666114	K562	TRUE
chr2	39141876	39142328	ENSG00000115875	SRSF7	38751361	K562	TRUE
chr2	39150111	39150496	ENSG00000115875	SRSF7	38751361	K562	TRUE
chr2	39150111	39150496	ENSG00000115904	SOS1	39121051	K562	TRUE
chr2	42989346	42989519	ENSG00000115970	THADA	43596046	K562	TRUE
chr2	43178625	43179481	ENSG00000152518	ZFP36L2	43226606	K562	TRUE
chr2	43190455	43191053	ENSG00000152518	ZFP36L2	43226606	K562	TRUE
chr2	55140428	55141011	ENSG00000115310	RTN4	55010449	K562	TRUE
chr2	68352631	68353045	ENSG00000119865	CNRIP1	68319400	K562	TRUE
chr2	68829102	68829733	ENSG00000115977	AAK1	69643040	K562	TRUE
chr2	72901285	72902066	ENSG00000135638	EMX1	72916260	K562	TRUE
chr2	83969101	83969419	ENSG00000034510	TMSB10	84905656	K562	TRUE
chr2	84919877	84920465	ENSG00000034510	TMSB10	84905656	K562	TRUE
chr2	85993878	85994391	ENSG00000115525	ST3GAL5	85888990	K562	TRUE
chr2	88057493	88057858	ENSG00000172086	KRCC1	88055783	K562	TRUE
chr2	112256775	112257026	ENSG00000144161	ZC3H8	112255042	K562	TRUE
chr2	118802934	118803512	ENSG00000163064	EN1	118847648	K562	TRUE
chr2	120343288	120343778	ENSG00000144118	RALB	120240064	K562	TRUE
chr2	126645121	126645784	ENSG00000136732	GYPC	126656158	K562	TRUE
chr2	126651064	126651403	ENSG00000136732	GYPC	126656158	K562	TRUE
chr2	131668896	131669203	ENSG00000163040	CCDC74A	131527675	K562	TRUE
chr2	144582587	144583250	ENSG00000169554	ZEB2	144430934	K562	TRUE
chr2	151760261	151760750	ENSG00000157827	FMNL2	152335174	K562	TRUE
chr2	171513679	171514152	ENSG00000071967	CYBRD1	171522247	K562	TRUE
chr2	190781664	190782027	ENSG00000198130	HIBCH	190205232	K562	TRUE
chr2	191597195	191597646	ENSG00000173559	NABP1	191678068	K562	TRUE
chr2	219662027	219662194	ENSG00000123989	CHPF	219543097	K562	TRUE
chr2	230658624	230659752	ENSG00000135932	CAB39	230712842	K562	TRUE
chr2	234513223	234513772	ENSG00000188042	ARL4C	234497081	K562	TRUE
chr2	235460434	235461258	ENSG00000157985	AGAP1	235494089	K562	TRUE
chr2	237964148	237964551	ENSG00000184182	UBE2F	237966945	K562	TRUE
chr2	237964878	237965541	ENSG00000184182	UBE2F	237966945	K562	TRUE
chr2	238421295	238421980	ENSG00000065802	ASB1	238426742	K562	TRUE
chr2	238422151	238422783	ENSG00000065802	ASB1	238426742	K562	TRUE
chr20	402017	402293	ENSG00000125826	RBCK1	407498	K562	TRUE
chr20	828933	829496	ENSG00000125898	FAM110A	833715	K562	TRUE
chr20	2821294	2821675	ENSG00000215305	VPS16	2840745	K562	TRUE
chr20	3077577	3078341	ENSG00000101200	AVP	3084724	K562	TRUE
chr20	4082721	4083418	ENSG00000101236	RNF24	4015389	K562	TRUE
chr20	4673465	4674149	ENSG00000171867	PRNP	4686456	K562	TRUE
chr20	31608402	31608977	ENSG00000125968	ID1	31605283	K562	TRUE
chr20	31610523	31611121	ENSG00000125968	ID1	31605283	K562	TRUE
chr20	47358806	47359019	ENSG00000101040	ZMYND8	47355657	K562	TRUE
chr20	47360522	47361177	ENSG00000101040	ZMYND8	47355657	K562	TRUE
chr20	47500803	47500875	ENSG00000158296	SLC13A3	46651459	K562	TRUE
chr20	50711196	50711384	ENSG00000124171	PARD6B	50731580	K562	TRUE
chr21	14452120	14452281	ENSG00000155307	SAMSN1	14546341	K562	TRUE
chr21	14454237	14454893	ENSG00000155307	SAMSN1	14546341	K562	TRUE
chr21	14677594	14677990	ENSG00000155307	SAMSN1	14546341	K562	TRUE
chr21	15210285	15210677	ENSG00000180530	NRIP1	15064934	K562	TRUE
chr21	43767823	43768871	ENSG00000160213	CSTB	43776238	K562	TRUE
chr21	43860650	43861147	ENSG00000141959	PFKL	44300053	K562	TRUE
chr21	45359997	45360709	ENSG00000182871	COL18A1	45405165	K562	TRUE
chr22	19627502	19627582	ENSG00000070413	DGCR2	19122407	K562	TRUE
chr22	20187977	20188680	ENSG00000070371	CLTCL1	19291685	K562	TRUE
chr22	26632476	26633226	ENSG00000128294	TPST2	26590132	K562	TRUE
chr22	29195471	29196309	ENSG00000186998	EMID1	29205896	K562	TRUE
chr22	30216544	30217189	ENSG00000182541	LIMK2	31212239	K562	TRUE
chr22	36980722	36981049	ENSG00000128309	MPST	37019635	K562	TRUE
chr22	36982065	36982664	ENSG00000128309	MPST	37019635	K562	TRUE
chr22	36982065	36982664	ENSG00000128311	TST	37019467	K562	TRUE
chr22	36982065	36982664	ENSG00000100097	LGALS1	37675636	K562	TRUE
chr22	37607010	37607469	ENSG00000128283	CDC42EP1	37560480	K562	TRUE
chr22	37802074	37803970	ENSG00000100116	GCAT	37807905	K562	TRUE
chr22	38404140	38404326	ENSG00000100097	LGALS1	37675636	K562	TRUE
chr22	38514572	38514980	ENSG00000100097	LGALS1	37675636	K562	TRUE
chr22	39452568	39453116	ENSG00000100321	SYNGR1	39349925	K562	TRUE
chr22	39452568	39453116	ENSG00000128268	MGAT3	39457012	K562	TRUE
chr22	40654582	40654956	ENSG00000100393	EP300	41092592	K562	TRUE
chr3	5021829	5022027	ENSG00000134107	BHLHE40	4979437	K562	TRUE
chr3	14232347	14233211	ENSG00000170860	LSM3	14178817	K562	TRUE
chr3	14232347	14233211	ENSG00000131389	SLC6A6	14402576	K562	TRUE
chr3	14232347	14233211	ENSG00000154767	XPC	14178601	K562	TRUE
chr3	14234498	14234613	ENSG00000131389	SLC6A6	14402576	K562	TRUE
chr3	20022860	20023307	ENSG00000114166	KAT2B	20040446	K562	TRUE
chr3	36954887	36955096	ENSG00000168016	TRANK1	36945057	K562	TRUE
chr3	37229685	37230140	ENSG00000144674	GOLGA4	37243177	K562	TRUE
chr3	49134490	49134703	ENSG00000114268	PFKFB4	48556803	K562	TRUE
chr3	53269878	53270754	ENSG00000163931	TKT	53256022	K562	TRUE
chr3	69724728	69725590	ENSG00000187098	MITF	69739464	K562	TRUE
chr3	72288827	72290063	ENSG00000163602	RYBP	72446623	K562	TRUE
chr3	87798014	87798334	ENSG00000179097		87792492	K562	TRUE
chr3	87801555	87801742	ENSG00000179097		87792492	K562	TRUE
chr3	101530270	101530818	ENSG00000138468	SENP7	101513212	K562	TRUE
chr3	108104250	108104804	ENSG00000196776	CD47	108091025	K562	TRUE
chr3	120572118	120572338	ENSG00000065518	NDUFB4	120596336	K562	TRUE
chr3	128411602	128411787	ENSG00000179348	GATA2	128493201	K562	TRUE
chr3	128412521	128413816	ENSG00000179348	GATA2	128493201	K562	TRUE
chr3	128414282	128414349	ENSG00000179348	GATA2	128493201	K562	TRUE
chr3	128415175	128417575	ENSG00000179348	GATA2	128493201	K562	TRUE
chr3	137013778	137014790	ENSG00000174579	MSL2	136196335	K562	TRUE
chr3	138875636	138876369	ENSG00000051382	PIK3CB	138834928	K562	TRUE
chr3	141848708	141848852	ENSG00000069849	ATP1B3	141876124	K562	TRUE
chr3	141849000	141849859	ENSG00000069849	ATP1B3	141876124	K562	TRUE
chr3	143084842	143085490	ENSG00000175040	CHST2	143119771	K562	TRUE
chr3	150729665	150730057	ENSG00000181788	SIAH2	150763169	K562	TRUE
chr3	150733306	150733997	ENSG00000181788	SIAH2	150763169	K562	TRUE
chr3	152976280	152976692	ENSG00000169860	P2RY1	152835131	K562	TRUE
chr3	157534753	157535190	ENSG00000197415	VEPH1	157503339	K562	TRUE
chr3	168116229	168116729	ENSG00000173905	GOLIM4	168095924	K562	TRUE
chr3	171470685	171471177	ENSG00000154310	TNIK	171460405	K562	TRUE
chr3	179301641	179302057	ENSG00000136522	MRPL47	179604638	K562	TRUE
chr3	182714135	182714400	ENSG00000058063	ATP11B	182793504	K562	TRUE
chr3	182715178	182715267	ENSG00000058063	ATP11B	182793504	K562	TRUE
chr3	186871297	186871900	ENSG00000073849	ST6GAL1	186930325	K562	TRUE
chr3	196181819	196182308	ENSG00000072274	TFRC	196055214	K562	TRUE
chr3	196181819	196182308	ENSG00000163958	ZDHHC19	196211400	K562	TRUE
chr3	196193787	196194446	ENSG00000072274	TFRC	196055214	K562	TRUE
chr4	1784888	1786262	ENSG00000068078	FGFR3	1793293	K562	TRUE
chr4	2266870	2267922	ENSG00000168924	LETM1	1856156	K562	TRUE
chr4	10239962	10240811	ENSG00000178163	ZNF518B	10457426	K562	TRUE
chr4	48481613	48482008	ENSG00000145248	SLC10A4	48483343	K562	TRUE
chr4	54542487	54543098	ENSG00000157404	KIT	54657918	K562	TRUE
chr4	54571162	54571986	ENSG00000157404	KIT	54657918	K562	TRUE
chr4	55666539	55666736	ENSG00000109255	NMU	55636284	K562	TRUE
chr4	55723510	55723669	ENSG00000109255	NMU	55636284	K562	TRUE
chr4	55729688	55730414	ENSG00000109255	NMU	55636284	K562	TRUE
chr4	55730465	55730928	ENSG00000109255	NMU	55636284	K562	TRUE
chr4	55730465	55730928	ENSG00000163440	PDCL2	55592245	K562	TRUE
chr4	55730465	55730928	ENSG00000128039	SRD5A3	55346242	K562	TRUE
chr4	55733862	55734227	ENSG00000109255	NMU	55636284	K562	TRUE
chr4	74056553	74057496	ENSG00000081041	CXCL2	74099195	K562	TRUE
chr4	74056553	74057496	ENSG00000163734	CXCL3	74038689	K562	TRUE
chr4	74057709	74057893	ENSG00000081041	CXCL2	74099195	K562	TRUE
chr4	74057709	74057893	ENSG00000163734	CXCL3	74038689	K562	TRUE
chr4	74330487	74330786	ENSG00000124882	EREG	74365145	K562	TRUE
chr4	78691567	78691673	ENSG00000138756	BMP2K	78776342	K562	TRUE
chr4	78691839	78692517	ENSG00000138756	BMP2K	78776342	K562	TRUE
chr4	78721023	78721507	ENSG00000138756	BMP2K	78776342	K562	TRUE
chr4	78732500	78733133	ENSG00000138756	BMP2K	78776342	K562	TRUE
chr4	80127465	80127602	ENSG00000163297	ANTXR2	80073229	K562	TRUE
chr4	80143299	80143719	ENSG00000163297	ANTXR2	80073229	K562	TRUE
chr4	80179526	80180174	ENSG00000163297	ANTXR2	80073229	K562	TRUE
chr4	83629892	83630615	ENSG00000138678	GPAT3	83535914	K562	TRUE
chr4	98682656	98683111	ENSG00000168785	TSPAN5	98658570	K562	TRUE
chr4	98686846	98687272	ENSG00000168785	TSPAN5	98658570	K562	TRUE
chr4	110248767	110249181	ENSG00000170522	ELOVL6	110198653	K562	TRUE
chr4	122749712	122749853	ENSG00000181004	BBS12	122732702	K562	TRUE
chr4	122749712	122749853	ENSG00000138685	FGF2	122826708	K562	TRUE
chr4	122749712	122749853	ENSG00000145375	SPATA5	122923070	K562	TRUE
chr4	139178555	139178679	ENSG00000137463	MGARP	139280225	K562	TRUE
chr4	163493028	163493299	ENSG00000198498	TMA16	163494442	K562	TRUE
chr4	176290513	176291009	ENSG00000129128	SPCS3	176319966	K562	TRUE
chr5	1525117	1525352	ENSG00000153395	LPCAT1	1523962	K562	TRUE
chr5	10310505	10310737	ENSG00000164237	CMBL	10282288	K562	TRUE
chr5	40801908	40802400	ENSG00000132356	PRKAA1	40798198	K562	TRUE
chr5	43320854	43321182	ENSG00000112972	HMGCS1	43313412	K562	TRUE
chr5	53118852	53119310	ENSG00000164172	MOCS2	53109771	K562	TRUE
chr5	53120265	53120437	ENSG00000164172	MOCS2	53109771	K562	TRUE
chr5	54313334	54313681	ENSG00000178996	SNX18	54517759	K562	TRUE
chr5	62261579	62262036	ENSG00000068796	KIF2A	62306162	K562	TRUE
chr5	74592025	74592385	ENSG00000171617	ENC1	74641424	K562	TRUE
chr5	76372407	76373070	ENSG00000145703	IQGAP2	76403285	K562	TRUE
chr5	81754806	81754891	ENSG00000145687	SSBP2	81751253	K562	TRUE
chr5	81758825	81759130	ENSG00000145687	SSBP2	81751253	K562	TRUE
chr5	138458362	138458528	ENSG00000120738	EGR1	138465479	K562	TRUE
chr5	139635653	139636488	ENSG00000131508	UBE2D2	139526431	K562	TRUE
chr5	139635653	139636488	ENSG00000120306	CYSTM1	140175156	K562	TRUE
chr5	142014294	142014566	ENSG00000113552	GNPDA1	142013027	K562	TRUE
chr5	145854558	145855157	ENSG00000186314	PRELID2	145765000	K562	TRUE
chr5	154653625	154654421	ENSG00000155506	LARP1	154712843	K562	TRUE
chr5	172802257	172803165	ENSG00000120129	DUSP1	172771195	K562	TRUE
chr5	172802257	172803165	ENSG00000113739	STC2	173329503	K562	TRUE
chr5	173822422	173822824	ENSG00000164463	CREBRF	173056352	K562	TRUE
chr5	173853351	173853891	ENSG00000113742	CPEB4	173888349	K562	TRUE
chr5	173855533	173856102	ENSG00000113742	CPEB4	173888349	K562	TRUE
chr5	173860532	173860999	ENSG00000113742	CPEB4	173888349	K562	TRUE
chr5	173862189	173862464	ENSG00000113742	CPEB4	173888349	K562	TRUE
chr5	177556984	177557430	ENSG00000113758	DBN1	177473741	K562	TRUE
chr5	177561341	177561509	ENSG00000113758	DBN1	177473741	K562	TRUE
chr5	178081677	178082349	ENSG00000113758	DBN1	177473741	K562	TRUE
chr5	178831944	178832113	ENSG00000197451	HNRNPAB	178204533	K562	TRUE
chr6	3160148	3160742	ENSG00000137267	TUBB2A	3157544	K562	TRUE
chr6	3162514	3163406	ENSG00000137267	TUBB2A	3157544	K562	TRUE
chr6	3473044	3473524	ENSG00000198721	ECI2	4135575	K562	TRUE
chr6	3473044	3473524	ENSG00000124535	WRNIP1	2765393	K562	TRUE
chr6	4176809	4177288	ENSG00000198721	ECI2	4135575	K562	TRUE
chr6	13912965	13913326	ENSG00000180537	RNF182	13924446	K562	TRUE
chr6	13987283	13987905	ENSG00000180537	RNF182	13924446	K562	TRUE
chr6	13989666	13989766	ENSG00000180537	RNF182	13924446	K562	TRUE
chr6	13992618	13993055	ENSG00000180537	RNF182	13924446	K562	TRUE
chr6	14108628	14109415	ENSG00000112149	CD83	14117772	K562	TRUE
chr6	16047546	16047736	ENSG00000007944	MYLIP	16129086	K562	TRUE
chr6	16215257	16215943	ENSG00000137198	GMPR	16238587	K562	TRUE
chr6	16224437	16224805	ENSG00000137198	GMPR	16238587	K562	TRUE
chr6	25958670	25958974	ENSG00000124575	H1-3	26234987	K562	TRUE
chr6	25958670	25958974	ENSG00000168298	H1-4	26156329	K562	TRUE
chr6	25958670	25958974	ENSG00000197061	H4C3	26103933	K562	TRUE
chr6	26295756	26296415	ENSG00000158406	H4C8	26285638	K562	TRUE
chr6	26296920	26297447	ENSG00000158406	H4C8	26285638	K562	TRUE
chr6	26296920	26297447	ENSG00000187837	H1-2	26056470	K562	TRUE
chr6	26309856	26309970	ENSG00000168298	H1-4	26156329	K562	TRUE
chr6	26311059	26311278	ENSG00000112343	TRIM38	25962802	K562	TRUE
chr6	26336278	26337156	ENSG00000187837	H1-2	26056470	K562	TRUE
chr6	26336278	26337156	ENSG00000197903	H2BC12	27146855	K562	TRUE
chr6	26478142	26478577	ENSG00000158406	H4C8	26285638	K562	TRUE
chr6	26478142	26478577	ENSG00000158373	H2BC5	26158146	K562	TRUE
chr6	26532704	26533457	ENSG00000158373	H2BC5	26158146	K562	TRUE
chr6	26553186	26554396	ENSG00000180573	H2AC6	26124145	K562	TRUE
chr6	26592812	26592916	ENSG00000124575	H1-3	26234987	K562	TRUE
chr6	27177127	27178204	ENSG00000158406	H4C8	26285638	K562	TRUE
chr6	27188342	27189228	ENSG00000158406	H4C8	26285638	K562	TRUE
chr6	27600519	27600691	ENSG00000197903	H2BC12	27146855	K562	TRUE
chr6	27600519	27600691	ENSG00000124635	H2BC11	27132750	K562	TRUE
chr6	27668441	27668959	ENSG00000198315	ZKSCAN8	28141910	K562	TRUE
chr6	27687274	27688662	ENSG00000198315	ZKSCAN8	28141910	K562	TRUE
chr6	27895524	27895808	ENSG00000124657	OR2B6	27957241	K562	TRUE
chr6	27901846	27902104	ENSG00000197903	H2BC12	27146855	K562	TRUE
chr6	27901846	27902104	ENSG00000124635	H2BC11	27132750	K562	TRUE
chr6	27902330	27903402	ENSG00000124657	OR2B6	27957241	K562	TRUE
chr6	28719663	28719931	ENSG00000197279	ZNF165	28080568	K562	TRUE
chr6	28729184	28729506	ENSG00000184357	H1-5	27867588	K562	TRUE
chr6	28980631	28981453	ENSG00000204713	TRIM27	28908989	K562	TRUE
chr6	28992601	28992912	ENSG00000198315	ZKSCAN8	28141910	K562	TRUE
chr6	30793778	30793897	ENSG00000137331	IER3	30744548	K562	TRUE
chr6	32131505	32131952	ENSG00000204315	FKBPL	32130288	K562	TRUE
chr6	37050015	37051033	ENSG00000137193	PIM1	37170152	K562	TRUE
chr6	37109660	37110484	ENSG00000137193	PIM1	37170152	K562	TRUE
chr6	42197447	42198399	ENSG00000048544	MRPS10	42217861	K562	TRUE
chr6	42199270	42199956	ENSG00000048544	MRPS10	42217861	K562	TRUE
chr6	44462361	44462728	ENSG00000112759	SLC29A1	44219553	K562	TRUE
chr6	47420401	47420914	ENSG00000198087	CD2AP	47477789	K562	TRUE
chr6	49646128	49646757	ENSG00000112077	RHAG	49636839	K562	TRUE
chr6	83974451	83975056	ENSG00000065615	CYB5R4	83859689	K562	TRUE
chr6	83974451	83975056	ENSG00000135315	CEP162	84195030	K562	TRUE
chr6	83974451	83975056	ENSG00000135324	MRAP2	84033772	K562	TRUE
chr6	89035367	89036201	ENSG00000146278	PNRC1	89080751	K562	TRUE
chr6	125303490	125303670	ENSG00000111906	HDDC2	125276217	K562	TRUE
chr6	125307170	125307759	ENSG00000111906	HDDC2	125276217	K562	TRUE
chr6	125307170	125307759	ENSG00000111907	TPD52L1	125119049	K562	TRUE
chr6	139445411	139445863	ENSG00000164442	CITED2	139374648	K562	TRUE
chr6	139449150	139449278	ENSG00000164442	CITED2	139374648	K562	TRUE
chr6	139518618	139519094	ENSG00000164442	CITED2	139374648	K562	TRUE
chr6	139534088	139534926	ENSG00000164442	CITED2	139374648	K562	TRUE
chr6	139625194	139625857	ENSG00000164442	CITED2	139374648	K562	TRUE
chr6	139648298	139648878	ENSG00000164442	CITED2	139374648	K562	TRUE
chr6	150271359	150272391	ENSG00000198729	PPP1R14C	150143044	K562	TRUE
chr6	154513944	154514184	ENSG00000153721	CNKSR3	154510685	K562	TRUE
chr6	157964108	157964450	ENSG00000078269	SYNJ2	157981863	K562	TRUE
chr6	166959300	166959586	ENSG00000026297	RNASET2	166956611	K562	TRUE
chr7	2399903	2400590	ENSG00000136213	CHST12	2403588	K562	TRUE
chr7	5574187	5575298	ENSG00000075618	FSCN1	5592816	K562	TRUE
chr7	7105047	7105164	ENSG00000106392	C1GALT1	7156934	K562	TRUE
chr7	7148789	7149266	ENSG00000106392	C1GALT1	7156934	K562	TRUE
chr7	12722715	12723115	ENSG00000122644	ARL4A	12686856	K562	TRUE
chr7	22680564	22680961	ENSG00000136244	IL6	22725884	K562	TRUE
chr7	22680564	22680961	ENSG00000105889	STEAP1B	22500177	K562	TRUE
chr7	22681862	22682474	ENSG00000136244	IL6	22725884	K562	TRUE
chr7	29793521	29793933	ENSG00000122574	WIPF3	29806486	K562	TRUE
chr7	43756596	43757363	ENSG00000106605	BLVRA	43758680	K562	TRUE
chr7	43756596	43757363	ENSG00000106603	COA1	43729513	K562	TRUE
chr7	64849376	64849959	ENSG00000198039	ZNF273	64870172	K562	TRUE
chr7	76291396	76292164	ENSG00000106211	HSPB1	76302673	K562	TRUE
chr7	93004886	93005341	ENSG00000105810	CDK6	92833917	K562	TRUE
chr7	100444318	100445171	ENSG00000160813	PPP1R35	100436136	K562	TRUE
chr7	100533333	100533677	ENSG00000128564	VGF	101165569	K562	TRUE
chr7	100693324	100694817	ENSG00000146830	GIGYF1	100689448	K562	TRUE
chr7	103995975	103996570	ENSG00000189056	RELN	103989658	K562	TRUE
chr7	106978314	106978985	ENSG00000005249	PRKAR2B	107044705	K562	TRUE
chr7	106979157	106979470	ENSG00000005249	PRKAR2B	107044705	K562	TRUE
chr7	106979682	106980081	ENSG00000005249	PRKAR2B	107044705	K562	TRUE
chr7	107007008	107007774	ENSG00000005249	PRKAR2B	107044705	K562	TRUE
chr7	107010059	107010527	ENSG00000005249	PRKAR2B	107044705	K562	TRUE
chr7	107025631	107025827	ENSG00000005249	PRKAR2B	107044705	K562	TRUE
chr7	107035365	107035800	ENSG00000005249	PRKAR2B	107044705	K562	TRUE
chr7	116950058	116950383	ENSG00000004866	ST7	116953238	K562	TRUE
chr7	134639866	134640286	ENSG00000172331	BPGM	134646853	K562	TRUE
chr7	138352492	138353455	ENSG00000122779	TRIM24	138460259	K562	TRUE
chr7	142804703	142805104	ENSG00000106123	EPHB6	142855061	K562	TRUE
chr7	142808710	142809601	ENSG00000106123	EPHB6	142855061	K562	TRUE
chr7	142838473	142839174	ENSG00000106123	EPHB6	142855061	K562	TRUE
chr7	142964445	142964846	ENSG00000197993	KEL	142962363	K562	TRUE
chr7	155290955	155291554	ENSG00000186480	INSIG1	155297878	K562	TRUE
chr8	11877723	11878098	ENSG00000164733	CTSB	11853479	K562	TRUE
chr8	11879278	11880072	ENSG00000164733	CTSB	11853479	K562	TRUE
chr8	18122577	18123132	ENSG00000104763	ASAH1	18084107	K562	TRUE
chr8	22672980	22673829	ENSG00000158941	CCAR2	22604632	K562	TRUE
chr8	23508623	23509479	ENSG00000147454	SLC25A37	23528956	K562	TRUE
chr8	27488886	27489200	ENSG00000120915	EPHX2	27491143	K562	TRUE
chr8	30911832	30913318	ENSG00000133863	TEX15	30888706	K562	TRUE
chr8	38090551	38090666	ENSG00000129691	ASH2L	38105529	K562	TRUE
chr8	38090551	38090666	ENSG00000147465	STAR	38150952	K562	TRUE
chr8	55847839	55848398	ENSG00000254087	LYN	55879835	K562	TRUE
chr8	60284860	60285506	ENSG00000178538	CA8	60281400	K562	TRUE
chr8	60326065	60326180	ENSG00000178538	CA8	60281400	K562	TRUE
chr8	60330156	60330864	ENSG00000178538	CA8	60281400	K562	TRUE
chr8	67366151	67366560	ENSG00000066777	ARFGEF1	67271708	K562	TRUE
chr8	85959078	85959512	ENSG00000133742	CA1	85379014	K562	TRUE
chr8	90167947	90168315	ENSG00000104325	DECR1	90001405	K562	TRUE
chr8	90187657	90188091	ENSG00000104325	DECR1	90001405	K562	TRUE
chr8	95160142	95160346	ENSG00000164941	INTS8	94813311	K562	TRUE
chr8	100883916	100884229	ENSG00000156509	FBXO43	100145817	K562	TRUE
chr8	123166222	123167951	ENSG00000147689	FAM83A	123178960	K562	TRUE
chr9	5839193	5839782	ENSG00000099219	ERMP1	5833070	K562	TRUE
chr9	19154070	19154658	ENSG00000147872	PLIN2	19118446	K562	TRUE
chr9	69020566	69021071	ENSG00000165060	FXN	69035751	K562	TRUE
chr9	73143944	73144248	ENSG00000135046	ANXA1	73151865	K562	TRUE
chr9	73149573	73149823	ENSG00000135046	ANXA1	73151865	K562	TRUE
chr9	87410207	87410780	ENSG00000196730	DAPK1	87497228	K562	TRUE
chr9	87792737	87793246	ENSG00000135047	CTSL	87724051	K562	TRUE
chr9	97960793	97961298	ENSG00000136929	HEMGN	97944856	K562	TRUE
chr9	97960793	97961298	ENSG00000136938	ANP32B	97983341	K562	TRUE
chr9	98931971	98932483	ENSG00000204291	COL15A1	98943179	K562	TRUE
chr9	99075124	99075842	ENSG00000106799	TGFBR1	99104038	K562	TRUE
chr9	120896944	120897652	ENSG00000119403	PHF19	120877188	K562	TRUE
chr9	127862062	127863104	ENSG00000106992	AK1	127877675	K562	TRUE
chr9	128142126	128142299	ENSG00000148334	PTGES2	128127729	K562	TRUE
chr9	128783554	128783888	ENSG00000171169	NAIF1	128063742	K562	TRUE
chr9	132998806	132999728	ENSG00000165702	GFI1B	132944000	K562	TRUE
chr9	133003827	133004778	ENSG00000165702	GFI1B	132944000	K562	TRUE
chr9	136644323	136647032	ENSG00000172889	EGFL7	136658856	K562	TRUE
chr9	136787703	136788002	ENSG00000244187	TMEM141	136791344	K562	TRUE
chr1	108079535	108080109	ENSG00000162636	FAM102B	108560089	K562	FALSE
chr1	109079631	109079739	ENSG00000162636	FAM102B	108560089	K562	FALSE
chr1	109079631	109079739	ENSG00000031698	SARS1	109213918	K562	FALSE
chr1	109786701	109786823	ENSG00000031698	SARS1	109213918	K562	FALSE
chr1	109790655	109791251	ENSG00000031698	SARS1	109213918	K562	FALSE
chr1	109794269	109794586	ENSG00000031698	SARS1	109213918	K562	FALSE
chr1	109818184	109818925	ENSG00000031698	SARS1	109213918	K562	FALSE
chr1	109821967	109822809	ENSG00000031698	SARS1	109213918	K562	FALSE
chr1	109823680	109824243	ENSG00000031698	SARS1	109213918	K562	FALSE
chr1	109898927	109899082	ENSG00000031698	SARS1	109213918	K562	FALSE
chr1	109901615	109902169	ENSG00000031698	SARS1	109213918	K562	FALSE
chr1	109979605	109980018	ENSG00000031698	SARS1	109213918	K562	FALSE
chr1	112880874	112881358	ENSG00000081026	MAGI3	113390749	K562	FALSE
chr1	112893793	112894018	ENSG00000081026	MAGI3	113390749	K562	FALSE
chr1	112903998	112904396	ENSG00000081026	MAGI3	113390749	K562	FALSE
chr1	113141569	113142092	ENSG00000081026	MAGI3	113390749	K562	FALSE
chr1	113146780	113147136	ENSG00000081026	MAGI3	113390749	K562	FALSE
chr1	113210244	113210704	ENSG00000081026	MAGI3	113390749	K562	FALSE
chr1	113388587	113388923	ENSG00000081026	MAGI3	113390749	K562	FALSE
chr1	113693177	113693298	ENSG00000081026	MAGI3	113390749	K562	FALSE
chr1	114078207	114078599	ENSG00000081026	MAGI3	113390749	K562	FALSE
chr1	114080552	114081021	ENSG00000081026	MAGI3	113390749	K562	FALSE
chr1	114379918	114380489	ENSG00000081026	MAGI3	113390749	K562	FALSE
chr1	114388415	114388721	ENSG00000081026	MAGI3	113390749	K562	FALSE
chr1	115595606	115596231	ENSG00000116815	CD58	116571026	K562	FALSE
chr1	116138907	116139561	ENSG00000116815	CD58	116571026	K562	FALSE
chr1	116138907	116139561	ENSG00000143061	IGSF3	116667733	K562	FALSE
chr1	116138907	116139561	ENSG00000116830	TTF2	117060326	K562	FALSE
chr1	116420465	116420755	ENSG00000116815	CD58	116571026	K562	FALSE
chr1	116420465	116420755	ENSG00000143061	IGSF3	116667733	K562	FALSE
chr1	116420465	116420755	ENSG00000116830	TTF2	117060326	K562	FALSE
chr1	116679207	116680147	ENSG00000116815	CD58	116571026	K562	FALSE
chr1	116679207	116680147	ENSG00000143061	IGSF3	116667733	K562	FALSE
chr1	116679207	116680147	ENSG00000116830	TTF2	117060326	K562	FALSE
chr1	116682648	116682845	ENSG00000116815	CD58	116571026	K562	FALSE
chr1	116682648	116682845	ENSG00000143061	IGSF3	116667733	K562	FALSE
chr1	116682648	116682845	ENSG00000116830	TTF2	117060326	K562	FALSE
chr1	116737264	116737702	ENSG00000116815	CD58	116571026	K562	FALSE
chr1	116737264	116737702	ENSG00000143061	IGSF3	116667733	K562	FALSE
chr1	116737264	116737702	ENSG00000116830	TTF2	117060326	K562	FALSE
chr1	116825277	116826366	ENSG00000116815	CD58	116571026	K562	FALSE
chr1	116825277	116826366	ENSG00000143061	IGSF3	116667733	K562	FALSE
chr1	116825277	116826366	ENSG00000116830	TTF2	117060326	K562	FALSE
chr1	116826805	116827021	ENSG00000116815	CD58	116571026	K562	FALSE
chr1	116826805	116827021	ENSG00000143061	IGSF3	116667733	K562	FALSE
chr1	116826805	116827021	ENSG00000116830	TTF2	117060326	K562	FALSE
chr1	116827129	116827652	ENSG00000116815	CD58	116571026	K562	FALSE
chr1	116827129	116827652	ENSG00000143061	IGSF3	116667733	K562	FALSE
chr1	116827129	116827652	ENSG00000116830	TTF2	117060326	K562	FALSE
chr1	116846086	116846446	ENSG00000116815	CD58	116571026	K562	FALSE
chr1	116846086	116846446	ENSG00000143061	IGSF3	116667733	K562	FALSE
chr1	116846086	116846446	ENSG00000116830	TTF2	117060326	K562	FALSE
chr1	116881782	116882510	ENSG00000116815	CD58	116571026	K562	FALSE
chr1	116881782	116882510	ENSG00000143061	IGSF3	116667733	K562	FALSE
chr1	116881782	116882510	ENSG00000116830	TTF2	117060326	K562	FALSE
chr1	117339937	117340324	ENSG00000116815	CD58	116571026	K562	FALSE
chr1	117339937	117340324	ENSG00000143061	IGSF3	116667733	K562	FALSE
chr1	117339937	117340324	ENSG00000116830	TTF2	117060326	K562	FALSE
chr1	117638762	117638909	ENSG00000143061	IGSF3	116667733	K562	FALSE
chr1	117638762	117638909	ENSG00000116830	TTF2	117060326	K562	FALSE
chr1	117655128	117655498	ENSG00000143061	IGSF3	116667733	K562	FALSE
chr1	117655128	117655498	ENSG00000116830	TTF2	117060326	K562	FALSE
chr1	117659757	117660268	ENSG00000143061	IGSF3	116667733	K562	FALSE
chr1	117659757	117660268	ENSG00000116830	TTF2	117060326	K562	FALSE
chr1	117674519	117675013	ENSG00000116830	TTF2	117060326	K562	FALSE
chr1	117695983	117696092	ENSG00000116830	TTF2	117060326	K562	FALSE
chr1	117708199	117709019	ENSG00000116830	TTF2	117060326	K562	FALSE
chr1	150165785	150166354	ENSG00000136631	VPS45	150067279	K562	FALSE
chr1	150165785	150166354	ENSG00000143382	ADAMTSL4	150549369	K562	FALSE
chr1	150165785	150166354	ENSG00000143418	CERS2	150967631	K562	FALSE
chr1	150979260	150979893	ENSG00000136631	VPS45	150067279	K562	FALSE
chr1	150979260	150979893	ENSG00000143382	ADAMTSL4	150549369	K562	FALSE
chr1	150979260	150979893	ENSG00000143418	CERS2	150967631	K562	FALSE
chr1	151196352	151196633	ENSG00000143382	ADAMTSL4	150549369	K562	FALSE
chr1	151196352	151196633	ENSG00000143418	CERS2	150967631	K562	FALSE
chr1	151196352	151196633	ENSG00000163191	S100A11	152037004	K562	FALSE
chr1	151739561	151740259	ENSG00000143418	CERS2	150967631	K562	FALSE
chr1	151739561	151740259	ENSG00000163191	S100A11	152037004	K562	FALSE
chr1	151945665	151946148	ENSG00000143418	CERS2	150967631	K562	FALSE
chr1	151945665	151946148	ENSG00000163191	S100A11	152037004	K562	FALSE
chr1	152070985	152071615	ENSG00000163191	S100A11	152037004	K562	FALSE
chr1	152495185	152495392	ENSG00000163191	S100A11	152037004	K562	FALSE
chr1	152495185	152495392	ENSG00000163218	PGLYRP4	153348841	K562	FALSE
chr1	152654005	152654457	ENSG00000163191	S100A11	152037004	K562	FALSE
chr1	152654005	152654457	ENSG00000163218	PGLYRP4	153348841	K562	FALSE
chr1	152654005	152654457	ENSG00000197956	S100A6	153536215	K562	FALSE
chr1	152871136	152871613	ENSG00000163191	S100A11	152037004	K562	FALSE
chr1	152871136	152871613	ENSG00000163218	PGLYRP4	153348841	K562	FALSE
chr1	152871136	152871613	ENSG00000197956	S100A6	153536215	K562	FALSE
chr1	153059262	153059761	ENSG00000163218	PGLYRP4	153348841	K562	FALSE
chr1	153059262	153059761	ENSG00000197956	S100A6	153536215	K562	FALSE
chr1	153394114	153394359	ENSG00000163218	PGLYRP4	153348841	K562	FALSE
chr1	153394114	153394359	ENSG00000197956	S100A6	153536215	K562	FALSE
chr1	153432964	153433827	ENSG00000163218	PGLYRP4	153348841	K562	FALSE
chr1	153432964	153433827	ENSG00000197956	S100A6	153536215	K562	FALSE
chr1	153697105	153698764	ENSG00000163218	PGLYRP4	153348841	K562	FALSE
chr1	153697105	153698764	ENSG00000197956	S100A6	153536215	K562	FALSE
chr1	154354371	154355032	ENSG00000197956	S100A6	153536215	K562	FALSE
chr1	154384772	154384993	ENSG00000197956	S100A6	153536215	K562	FALSE
chr1	154385562	154385892	ENSG00000197956	S100A6	153536215	K562	FALSE
chr1	154386563	154387028	ENSG00000197956	S100A6	153536215	K562	FALSE
chr1	156460461	156460969	ENSG00000125462	MIR9-1HG	156417439	K562	FALSE
chr1	156460461	156460969	ENSG00000143303	METTL25B	156728442	K562	FALSE
chr1	156502866	156503087	ENSG00000125462	MIR9-1HG	156417439	K562	FALSE
chr1	156502866	156503087	ENSG00000143303	METTL25B	156728442	K562	FALSE
chr1	156504872	156505672	ENSG00000125462	MIR9-1HG	156417439	K562	FALSE
chr1	156504872	156505672	ENSG00000143303	METTL25B	156728442	K562	FALSE
chr1	156602643	156603018	ENSG00000125462	MIR9-1HG	156417439	K562	FALSE
chr1	156602643	156603018	ENSG00000143303	METTL25B	156728442	K562	FALSE
chr1	156616378	156616900	ENSG00000125462	MIR9-1HG	156417439	K562	FALSE
chr1	156616378	156616900	ENSG00000143303	METTL25B	156728442	K562	FALSE
chr1	156663237	156663642	ENSG00000125462	MIR9-1HG	156417439	K562	FALSE
chr1	156663237	156663642	ENSG00000143303	METTL25B	156728442	K562	FALSE
chr1	156694007	156694674	ENSG00000125462	MIR9-1HG	156417439	K562	FALSE
chr1	156694007	156694674	ENSG00000143303	METTL25B	156728442	K562	FALSE
chr1	156890012	156890490	ENSG00000125462	MIR9-1HG	156417439	K562	FALSE
chr1	156890012	156890490	ENSG00000143303	METTL25B	156728442	K562	FALSE
chr1	157193628	157194089	ENSG00000125462	MIR9-1HG	156417439	K562	FALSE
chr1	157193628	157194089	ENSG00000143303	METTL25B	156728442	K562	FALSE
chr1	157227633	157228248	ENSG00000125462	MIR9-1HG	156417439	K562	FALSE
chr1	157227633	157228248	ENSG00000143303	METTL25B	156728442	K562	FALSE
chr1	157262433	157262811	ENSG00000125462	MIR9-1HG	156417439	K562	FALSE
chr1	157262433	157262811	ENSG00000143303	METTL25B	156728442	K562	FALSE
chr1	157273422	157274088	ENSG00000125462	MIR9-1HG	156417439	K562	FALSE
chr1	157273422	157274088	ENSG00000143303	METTL25B	156728442	K562	FALSE
chr1	157290424	157290525	ENSG00000125462	MIR9-1HG	156417439	K562	FALSE
chr1	157290424	157290525	ENSG00000143303	METTL25B	156728442	K562	FALSE
chr1	157311094	157312752	ENSG00000125462	MIR9-1HG	156417439	K562	FALSE
chr1	157311094	157312752	ENSG00000143303	METTL25B	156728442	K562	FALSE
chr1	157325241	157325576	ENSG00000125462	MIR9-1HG	156417439	K562	FALSE
chr1	157325241	157325576	ENSG00000143303	METTL25B	156728442	K562	FALSE
chr1	157367067	157367698	ENSG00000125462	MIR9-1HG	156417439	K562	FALSE
chr1	157367067	157367698	ENSG00000143303	METTL25B	156728442	K562	FALSE
chr1	158116463	158117090	ENSG00000163554	SPTA1	158686715	K562	FALSE
chr1	158149366	158150190	ENSG00000163554	SPTA1	158686715	K562	FALSE
chr1	158799718	158800081	ENSG00000163554	SPTA1	158686715	K562	FALSE
chr1	158799718	158800081	ENSG00000158716	DUSP23	159780932	K562	FALSE
chr1	158819537	158819908	ENSG00000163554	SPTA1	158686715	K562	FALSE
chr1	158819537	158819908	ENSG00000158716	DUSP23	159780932	K562	FALSE
chr1	159266923	159267092	ENSG00000163554	SPTA1	158686715	K562	FALSE
chr1	159266923	159267092	ENSG00000158716	DUSP23	159780932	K562	FALSE
chr1	159817657	159817921	ENSG00000158716	DUSP23	159780932	K562	FALSE
chr1	159821463	159821868	ENSG00000158716	DUSP23	159780932	K562	FALSE
chr1	160362169	160362905	ENSG00000158716	DUSP23	159780932	K562	FALSE
chr1	160363266	160363389	ENSG00000158716	DUSP23	159780932	K562	FALSE
chr1	160460832	160461056	ENSG00000158716	DUSP23	159780932	K562	FALSE
chr1	160658374	160658778	ENSG00000158716	DUSP23	159780932	K562	FALSE
chr1	160658374	160658778	ENSG00000143226	FCGR2A	161505430	K562	FALSE
chr1	160665437	160666268	ENSG00000158716	DUSP23	159780932	K562	FALSE
chr1	160665437	160666268	ENSG00000143226	FCGR2A	161505430	K562	FALSE
chr1	160989852	160990206	ENSG00000143226	FCGR2A	161505430	K562	FALSE
chr1	161389650	161390516	ENSG00000143226	FCGR2A	161505430	K562	FALSE
chr1	161487024	161487883	ENSG00000143226	FCGR2A	161505430	K562	FALSE
chr1	161611805	161613311	ENSG00000143226	FCGR2A	161505430	K562	FALSE
chr1	161621355	161621910	ENSG00000143226	FCGR2A	161505430	K562	FALSE
chr1	161730282	161730569	ENSG00000143226	FCGR2A	161505430	K562	FALSE
chr1	162055998	162056354	ENSG00000143226	FCGR2A	161505430	K562	FALSE
chr1	162389953	162390354	ENSG00000143226	FCGR2A	161505430	K562	FALSE
chr1	162391856	162392375	ENSG00000143226	FCGR2A	161505430	K562	FALSE
chr1	162421395	162421528	ENSG00000143226	FCGR2A	161505430	K562	FALSE
chr1	167617230	167618145	ENSG00000143158	MPC2	167936040	K562	FALSE
chr1	167714171	167715855	ENSG00000143158	MPC2	167936040	K562	FALSE
chr1	168398892	168399394	ENSG00000143158	MPC2	167936040	K562	FALSE
chr1	168603490	168603872	ENSG00000143158	MPC2	167936040	K562	FALSE
chr1	173269482	173269754	ENSG00000183831	ANKRD45	173669851	K562	FALSE
chr1	173303252	173303618	ENSG00000183831	ANKRD45	173669851	K562	FALSE
chr1	173330441	173330689	ENSG00000183831	ANKRD45	173669851	K562	FALSE
chr1	173355228	173355619	ENSG00000183831	ANKRD45	173669851	K562	FALSE
chr1	173393209	173393475	ENSG00000183831	ANKRD45	173669851	K562	FALSE
chr1	173672725	173672820	ENSG00000183831	ANKRD45	173669851	K562	FALSE
chr1	179015452	179015657	ENSG00000116199	FAM20B	179025804	K562	FALSE
chr1	179017896	179018230	ENSG00000116199	FAM20B	179025804	K562	FALSE
chr1	179292465	179292697	ENSG00000116199	FAM20B	179025804	K562	FALSE
chr1	180581709	180582038	ENSG00000143324	XPR1	180632022	K562	FALSE
chr1	180581709	180582038	ENSG00000162783	IER5	181088700	K562	FALSE
chr1	180585505	180586328	ENSG00000143324	XPR1	180632022	K562	FALSE
chr1	180585505	180586328	ENSG00000162783	IER5	181088700	K562	FALSE
chr1	180603235	180603641	ENSG00000143324	XPR1	180632022	K562	FALSE
chr1	180603235	180603641	ENSG00000162783	IER5	181088700	K562	FALSE
chr1	180609695	180610083	ENSG00000143324	XPR1	180632022	K562	FALSE
chr1	180609695	180610083	ENSG00000162783	IER5	181088700	K562	FALSE
chr1	180611239	180611720	ENSG00000143324	XPR1	180632022	K562	FALSE
chr1	180611239	180611720	ENSG00000162783	IER5	181088700	K562	FALSE
chr1	181104603	181105976	ENSG00000143324	XPR1	180632022	K562	FALSE
chr1	181104603	181105976	ENSG00000162783	IER5	181088700	K562	FALSE
chr1	181112397	181113421	ENSG00000143324	XPR1	180632022	K562	FALSE
chr1	181112397	181113421	ENSG00000162783	IER5	181088700	K562	FALSE
chr1	181129698	181130415	ENSG00000143324	XPR1	180632022	K562	FALSE
chr1	181129698	181130415	ENSG00000162783	IER5	181088700	K562	FALSE
chr1	181142324	181142872	ENSG00000143324	XPR1	180632022	K562	FALSE
chr1	181142324	181142872	ENSG00000162783	IER5	181088700	K562	FALSE
chr1	181152803	181153461	ENSG00000143324	XPR1	180632022	K562	FALSE
chr1	181152803	181153461	ENSG00000162783	IER5	181088700	K562	FALSE
chr1	181894023	181894209	ENSG00000162783	IER5	181088700	K562	FALSE
chr1	181894023	181894209	ENSG00000135821	GLUL	182391346	K562	FALSE
chr1	181894517	181894860	ENSG00000162783	IER5	181088700	K562	FALSE
chr1	181894517	181894860	ENSG00000135821	GLUL	182391346	K562	FALSE
chr1	181905931	181906431	ENSG00000162783	IER5	181088700	K562	FALSE
chr1	181905931	181906431	ENSG00000135821	GLUL	182391346	K562	FALSE
chr1	182330312	182330663	ENSG00000135821	GLUL	182391346	K562	FALSE
chr1	182362725	182363329	ENSG00000135821	GLUL	182391346	K562	FALSE
chr1	198079490	198079976	ENSG00000081237	PTPRC	198638457	K562	FALSE
chr1	198557086	198557168	ENSG00000081237	PTPRC	198638457	K562	FALSE
chr1	198605060	198605331	ENSG00000081237	PTPRC	198638457	K562	FALSE
chr1	201480143	201481242	ENSG00000134369	NAV1	201622927	K562	FALSE
chr1	201480143	201481242	ENSG00000163435	ELF3	202007945	K562	FALSE
chr1	201551808	201552196	ENSG00000134369	NAV1	201622927	K562	FALSE
chr1	201551808	201552196	ENSG00000163435	ELF3	202007945	K562	FALSE
chr1	201571066	201571466	ENSG00000134369	NAV1	201622927	K562	FALSE
chr1	201571066	201571466	ENSG00000163435	ELF3	202007945	K562	FALSE
chr1	201578184	201578837	ENSG00000134369	NAV1	201622927	K562	FALSE
chr1	201578184	201578837	ENSG00000163435	ELF3	202007945	K562	FALSE
chr1	201582340	201583142	ENSG00000134369	NAV1	201622927	K562	FALSE
chr1	201582340	201583142	ENSG00000163435	ELF3	202007945	K562	FALSE
chr1	201594550	201595190	ENSG00000134369	NAV1	201622927	K562	FALSE
chr1	201594550	201595190	ENSG00000163435	ELF3	202007945	K562	FALSE
chr1	201605166	201605449	ENSG00000134369	NAV1	201622927	K562	FALSE
chr1	201605166	201605449	ENSG00000163435	ELF3	202007945	K562	FALSE
chr1	202076735	202077215	ENSG00000134369	NAV1	201622927	K562	FALSE
chr1	202076735	202077215	ENSG00000163435	ELF3	202007945	K562	FALSE
chr1	202076735	202077215	ENSG00000163444	TMEM183A	203007374	K562	FALSE
chr1	202117937	202118346	ENSG00000134369	NAV1	201622927	K562	FALSE
chr1	202117937	202118346	ENSG00000163435	ELF3	202007945	K562	FALSE
chr1	202117937	202118346	ENSG00000163444	TMEM183A	203007374	K562	FALSE
chr1	202164408	202165009	ENSG00000134369	NAV1	201622927	K562	FALSE
chr1	202164408	202165009	ENSG00000163435	ELF3	202007945	K562	FALSE
chr1	202164408	202165009	ENSG00000163444	TMEM183A	203007374	K562	FALSE
chr1	202165392	202166940	ENSG00000134369	NAV1	201622927	K562	FALSE
chr1	202165392	202166940	ENSG00000163435	ELF3	202007945	K562	FALSE
chr1	202165392	202166940	ENSG00000163444	TMEM183A	203007374	K562	FALSE
chr1	202343858	202344032	ENSG00000134369	NAV1	201622927	K562	FALSE
chr1	202343858	202344032	ENSG00000163435	ELF3	202007945	K562	FALSE
chr1	202343858	202344032	ENSG00000163444	TMEM183A	203007374	K562	FALSE
chr1	202343858	202344032	ENSG00000159388	BTG2	203305491	K562	FALSE
chr1	202968930	202969376	ENSG00000163435	ELF3	202007945	K562	FALSE
chr1	202968930	202969376	ENSG00000163444	TMEM183A	203007374	K562	FALSE
chr1	202968930	202969376	ENSG00000159388	BTG2	203305491	K562	FALSE
chr1	206847390	206847924	ENSG00000117335	CD46	207752054	K562	FALSE
chr1	207084653	207085173	ENSG00000117335	CD46	207752054	K562	FALSE
chr1	207205059	207205449	ENSG00000117335	CD46	207752054	K562	FALSE
chr1	207311319	207311519	ENSG00000117335	CD46	207752054	K562	FALSE
chr1	207748158	207748391	ENSG00000117335	CD46	207752054	K562	FALSE
chr1	207923490	207924026	ENSG00000117335	CD46	207752054	K562	FALSE
chr1	207935158	207935491	ENSG00000117335	CD46	207752054	K562	FALSE
chr1	211556394	211556662	ENSG00000117691	NENF	212432920	K562	FALSE
chr1	211606393	211606816	ENSG00000117691	NENF	212432920	K562	FALSE
chr1	211606959	211607225	ENSG00000117691	NENF	212432920	K562	FALSE
chr1	211613179	211613763	ENSG00000117691	NENF	212432920	K562	FALSE
chr1	211613998	211614245	ENSG00000117691	NENF	212432920	K562	FALSE
chr1	211614747	211614946	ENSG00000117691	NENF	212432920	K562	FALSE
chr1	211630096	211631491	ENSG00000117691	NENF	212432920	K562	FALSE
chr1	211633097	211633811	ENSG00000117691	NENF	212432920	K562	FALSE
chr1	211928228	211928732	ENSG00000117691	NENF	212432920	K562	FALSE
chr1	212152149	212152709	ENSG00000117691	NENF	212432920	K562	FALSE
chr1	212152149	212152709	ENSG00000136643	RPS6KC1	213051241	K562	FALSE
chr1	212153615	212153890	ENSG00000117691	NENF	212432920	K562	FALSE
chr1	212153615	212153890	ENSG00000136643	RPS6KC1	213051241	K562	FALSE
chr1	212242142	212243081	ENSG00000117691	NENF	212432920	K562	FALSE
chr1	212242142	212243081	ENSG00000136643	RPS6KC1	213051241	K562	FALSE
chr1	212261401	212261824	ENSG00000117691	NENF	212432920	K562	FALSE
chr1	212261401	212261824	ENSG00000136643	RPS6KC1	213051241	K562	FALSE
chr1	212721576	212721828	ENSG00000117691	NENF	212432920	K562	FALSE
chr1	212721576	212721828	ENSG00000136643	RPS6KC1	213051241	K562	FALSE
chr1	213324976	213325983	ENSG00000117691	NENF	212432920	K562	FALSE
chr1	213324976	213325983	ENSG00000136643	RPS6KC1	213051241	K562	FALSE
chr1	225769012	225769468	ENSG00000143815	LBR	225428038	K562	FALSE
chr1	225769012	225769468	ENSG00000143811	PYCR2	225924250	K562	FALSE
chr1	225931332	225931702	ENSG00000143815	LBR	225428038	K562	FALSE
chr1	225931332	225931702	ENSG00000143811	PYCR2	225924250	K562	FALSE
chr1	225978440	225978577	ENSG00000143815	LBR	225428038	K562	FALSE
chr1	225978440	225978577	ENSG00000143811	PYCR2	225924250	K562	FALSE
chr1	226002118	226002281	ENSG00000143815	LBR	225428038	K562	FALSE
chr1	226002118	226002281	ENSG00000143811	PYCR2	225924250	K562	FALSE
chr1	226002696	226003260	ENSG00000143815	LBR	225428038	K562	FALSE
chr1	226002696	226003260	ENSG00000143811	PYCR2	225924250	K562	FALSE
chr1	226009663	226009901	ENSG00000143815	LBR	225428038	K562	FALSE
chr1	226009663	226009901	ENSG00000143811	PYCR2	225924250	K562	FALSE
chr1	226109652	226111823	ENSG00000143815	LBR	225428038	K562	FALSE
chr1	226109652	226111823	ENSG00000143811	PYCR2	225924250	K562	FALSE
chr1	226827530	226828510	ENSG00000143811	PYCR2	225924250	K562	FALSE
chr1	231159758	231160623	ENSG00000182118	FAM89A	231040254	K562	FALSE
chr1	241485478	241486005	ENSG00000174371	EXO1	241847967	K562	FALSE
chr1	241527157	241527451	ENSG00000174371	EXO1	241847967	K562	FALSE
chr1	241824009	241824288	ENSG00000174371	EXO1	241847967	K562	FALSE
chr1	241833816	241834120	ENSG00000174371	EXO1	241847967	K562	FALSE
chr1	247360104	247360793	ENSG00000162722	TRIM58	247857187	K562	FALSE
chr1	247470955	247471968	ENSG00000162722	TRIM58	247857187	K562	FALSE
chr1	247906605	247907055	ENSG00000162722	TRIM58	247857187	K562	FALSE
chr1	247906605	247907055	ENSG00000171161	ZNF672	248838210	K562	FALSE
chr1	248828799	248829255	ENSG00000162722	TRIM58	247857187	K562	FALSE
chr1	248828799	248829255	ENSG00000171161	ZNF672	248838210	K562	FALSE
chr1	248872983	248874540	ENSG00000171161	ZNF672	248838210	K562	FALSE
chr10	102434689	102434827	ENSG00000076685	NT5C2	103193306	K562	FALSE
chr10	103965927	103966042	ENSG00000076685	NT5C2	103193306	K562	FALSE
chr10	103965927	103966042	ENSG00000148841	ITPRIP	104338465	K562	FALSE
chr10	104347420	104347511	ENSG00000148841	ITPRIP	104338465	K562	FALSE
chr10	104350194	104350473	ENSG00000148841	ITPRIP	104338465	K562	FALSE
chr10	110206225	110206526	ENSG00000150593	PDCD4	110871928	K562	FALSE
chr10	110306208	110306471	ENSG00000150593	PDCD4	110871928	K562	FALSE
chr10	110410473	110410725	ENSG00000150593	PDCD4	110871928	K562	FALSE
chr10	110425899	110426529	ENSG00000150593	PDCD4	110871928	K562	FALSE
chr10	110557039	110557376	ENSG00000150593	PDCD4	110871928	K562	FALSE
chr10	110616487	110617056	ENSG00000150593	PDCD4	110871928	K562	FALSE
chr10	110858165	110858768	ENSG00000150593	PDCD4	110871928	K562	FALSE
chr10	117412039	117412216	ENSG00000165650	PDZD8	117375440	K562	FALSE
chr11	113555054	113555579	ENSG00000180425	C11orf71	114400417	K562	FALSE
chr11	113615183	113615474	ENSG00000180425	C11orf71	114400417	K562	FALSE
chr11	113634465	113634580	ENSG00000180425	C11orf71	114400417	K562	FALSE
chr11	113634924	113635528	ENSG00000180425	C11orf71	114400417	K562	FALSE
chr11	113663769	113663846	ENSG00000180425	C11orf71	114400417	K562	FALSE
chr11	113664115	113664330	ENSG00000180425	C11orf71	114400417	K562	FALSE
chr11	113664753	113665510	ENSG00000180425	C11orf71	114400417	K562	FALSE
chr11	113730908	113731252	ENSG00000180425	C11orf71	114400417	K562	FALSE
chr11	114384452	114384794	ENSG00000180425	C11orf71	114400417	K562	FALSE
chr11	118846255	118846734	ENSG00000019144	PHLDB1	118606440	K562	FALSE
chr11	119062950	119063066	ENSG00000019144	PHLDB1	118606440	K562	FALSE
chr11	119594661	119595265	ENSG00000019144	PHLDB1	118606440	K562	FALSE
chr11	124863860	124864129	ENSG00000149557	FEZ1	125592510	K562	FALSE
chr11	125551795	125552061	ENSG00000149557	FEZ1	125592510	K562	FALSE
chr12	110093894	110094378	ENSG00000174456	C12orf76	110048555	K562	FALSE
chr12	110093894	110094378	ENSG00000196850	PPTC7	110583318	K562	FALSE
chr12	110095757	110095950	ENSG00000174456	C12orf76	110048555	K562	FALSE
chr12	110095757	110095950	ENSG00000196850	PPTC7	110583318	K562	FALSE
chr12	110100198	110100577	ENSG00000174456	C12orf76	110048555	K562	FALSE
chr12	110100198	110100577	ENSG00000196850	PPTC7	110583318	K562	FALSE
chr12	110269418	110270920	ENSG00000174456	C12orf76	110048555	K562	FALSE
chr12	110269418	110270920	ENSG00000196850	PPTC7	110583318	K562	FALSE
chr12	110354009	110354547	ENSG00000174456	C12orf76	110048555	K562	FALSE
chr12	110354009	110354547	ENSG00000196850	PPTC7	110583318	K562	FALSE
chr12	110760196	110760477	ENSG00000174456	C12orf76	110048555	K562	FALSE
chr12	110760196	110760477	ENSG00000196850	PPTC7	110583318	K562	FALSE
chr12	116282435	116283035	ENSG00000123066	MED13L	116277693	K562	FALSE
chr12	116339907	116340282	ENSG00000123066	MED13L	116277693	K562	FALSE
chr12	116358794	116359838	ENSG00000123066	MED13L	116277693	K562	FALSE
chr12	116426328	116426820	ENSG00000123066	MED13L	116277693	K562	FALSE
chr12	116434267	116434492	ENSG00000123066	MED13L	116277693	K562	FALSE
chr12	116492643	116493335	ENSG00000123066	MED13L	116277693	K562	FALSE
chr12	116542630	116542904	ENSG00000123066	MED13L	116277693	K562	FALSE
chr12	124573686	124574537	ENSG00000073060	SCARB1	124863917	K562	FALSE
chr12	124573686	124574537	ENSG00000150991	UBC	124915348	K562	FALSE
chr12	124605176	124606557	ENSG00000073060	SCARB1	124863917	K562	FALSE
chr12	124605176	124606557	ENSG00000150991	UBC	124915348	K562	FALSE
chr12	124633350	124634072	ENSG00000073060	SCARB1	124863917	K562	FALSE
chr12	124633350	124634072	ENSG00000150991	UBC	124915348	K562	FALSE
chr12	124636115	124636634	ENSG00000073060	SCARB1	124863917	K562	FALSE
chr12	124636115	124636634	ENSG00000150991	UBC	124915348	K562	FALSE
chr12	124884695	124885440	ENSG00000073060	SCARB1	124863917	K562	FALSE
chr12	124884695	124885440	ENSG00000150991	UBC	124915348	K562	FALSE
chr12	124904462	124905209	ENSG00000073060	SCARB1	124863917	K562	FALSE
chr12	124904462	124905209	ENSG00000150991	UBC	124915348	K562	FALSE
chr12	124906700	124907110	ENSG00000073060	SCARB1	124863917	K562	FALSE
chr12	124906700	124907110	ENSG00000150991	UBC	124915348	K562	FALSE
chr12	124921630	124921902	ENSG00000073060	SCARB1	124863917	K562	FALSE
chr12	124921630	124921902	ENSG00000150991	UBC	124915348	K562	FALSE
chr12	124922121	124922262	ENSG00000073060	SCARB1	124863917	K562	FALSE
chr12	124922121	124922262	ENSG00000150991	UBC	124915348	K562	FALSE
chr12	124927175	124928262	ENSG00000073060	SCARB1	124863917	K562	FALSE
chr12	124927175	124928262	ENSG00000150991	UBC	124915348	K562	FALSE
chr12	124929126	124929539	ENSG00000073060	SCARB1	124863917	K562	FALSE
chr12	124929126	124929539	ENSG00000150991	UBC	124915348	K562	FALSE
chr12	124939160	124940391	ENSG00000073060	SCARB1	124863917	K562	FALSE
chr12	124939160	124940391	ENSG00000150991	UBC	124915348	K562	FALSE
chr12	124940595	124941080	ENSG00000073060	SCARB1	124863917	K562	FALSE
chr12	124940595	124941080	ENSG00000150991	UBC	124915348	K562	FALSE
chr13	110602236	110602474	ENSG00000088448	ANKRD10	110915069	K562	FALSE
chr13	110872105	110872343	ENSG00000088448	ANKRD10	110915069	K562	FALSE
chr13	110874439	110875517	ENSG00000088448	ANKRD10	110915069	K562	FALSE
chr13	110960269	110960478	ENSG00000088448	ANKRD10	110915069	K562	FALSE
chr13	111046832	111047189	ENSG00000088448	ANKRD10	110915069	K562	FALSE
chr14	102530875	102531252	ENSG00000100664	EIF5	103333544	K562	FALSE
chr14	102568044	102568775	ENSG00000100664	EIF5	103333544	K562	FALSE
chr14	102571077	102571367	ENSG00000100664	EIF5	103333544	K562	FALSE
chr14	102590628	102591195	ENSG00000100664	EIF5	103333544	K562	FALSE
chr14	103115218	103115461	ENSG00000100664	EIF5	103333544	K562	FALSE
chr14	103116655	103116950	ENSG00000100664	EIF5	103333544	K562	FALSE
chr14	103118952	103119450	ENSG00000100664	EIF5	103333544	K562	FALSE
chr14	103204808	103205899	ENSG00000100664	EIF5	103333544	K562	FALSE
chr14	103309138	103309727	ENSG00000100664	EIF5	103333544	K562	FALSE
chr14	103314426	103314986	ENSG00000100664	EIF5	103333544	K562	FALSE
chr14	103315258	103315639	ENSG00000100664	EIF5	103333544	K562	FALSE
chr14	103360476	103360928	ENSG00000100664	EIF5	103333544	K562	FALSE
chr14	103372592	103372893	ENSG00000100664	EIF5	103333544	K562	FALSE
chr14	103377977	103378604	ENSG00000100664	EIF5	103333544	K562	FALSE
chr14	103905991	103906200	ENSG00000100664	EIF5	103333544	K562	FALSE
chr16	10501026	10501456	ENSG00000166669	ATF7IP2	10326434	K562	FALSE
chr16	10737059	10737451	ENSG00000166669	ATF7IP2	10326434	K562	FALSE
chr16	10738303	10738649	ENSG00000166669	ATF7IP2	10326434	K562	FALSE
chr16	11232879	11233659	ENSG00000166669	ATF7IP2	10326434	K562	FALSE
chr16	11234034	11234376	ENSG00000166669	ATF7IP2	10326434	K562	FALSE
chr16	11238459	11239052	ENSG00000166669	ATF7IP2	10326434	K562	FALSE
chr16	11813747	11813985	ENSG00000103381	CPPED1	12803887	K562	FALSE
chr16	23274991	23275277	ENSG00000166501	PRKCB	23835983	K562	FALSE
chr16	23727663	23728251	ENSG00000166501	PRKCB	23835983	K562	FALSE
chr16	23729758	23730152	ENSG00000166501	PRKCB	23835983	K562	FALSE
chr16	23784739	23785180	ENSG00000166501	PRKCB	23835983	K562	FALSE
chr16	24463087	24463953	ENSG00000166501	PRKCB	23835983	K562	FALSE
chr16	29654878	29655457	ENSG00000090238	YPEL3	30094880	K562	FALSE
chr16	30628722	30629154	ENSG00000090238	YPEL3	30094880	K562	FALSE
chr16	30634072	30634935	ENSG00000090238	YPEL3	30094880	K562	FALSE
chr16	30635344	30635393	ENSG00000090238	YPEL3	30094880	K562	FALSE
chr16	30813954	30814873	ENSG00000090238	YPEL3	30094880	K562	FALSE
chr16	86428781	86429019	ENSG00000140941	MAP1LC3B	87383953	K562	FALSE
chr16	87052574	87053737	ENSG00000140941	MAP1LC3B	87383953	K562	FALSE
chr16	87052574	87053737	ENSG00000103257	SLC7A5	87863639	K562	FALSE
chr16	87521903	87522360	ENSG00000140941	MAP1LC3B	87383953	K562	FALSE
chr16	87521903	87522360	ENSG00000103257	SLC7A5	87863639	K562	FALSE
chr16	88118938	88119078	ENSG00000140941	MAP1LC3B	87383953	K562	FALSE
chr16	88118938	88119078	ENSG00000103257	SLC7A5	87863639	K562	FALSE
chr16	88146507	88147397	ENSG00000140941	MAP1LC3B	87383953	K562	FALSE
chr16	88146507	88147397	ENSG00000103257	SLC7A5	87863639	K562	FALSE
chr16	88332852	88333809	ENSG00000140941	MAP1LC3B	87383953	K562	FALSE
chr16	88332852	88333809	ENSG00000103257	SLC7A5	87863639	K562	FALSE
chr16	88409370	88409506	ENSG00000103257	SLC7A5	87863639	K562	FALSE
chr16	88799143	88799434	ENSG00000103257	SLC7A5	87863639	K562	FALSE
chr16	88799845	88800418	ENSG00000103257	SLC7A5	87863639	K562	FALSE
chr17	16386642	16387075	ENSG00000187688	TRPV2	16415571	K562	FALSE
chr17	16395881	16396379	ENSG00000187688	TRPV2	16415571	K562	FALSE
chr17	16396694	16397104	ENSG00000187688	TRPV2	16415571	K562	FALSE
chr17	16516568	16516923	ENSG00000187688	TRPV2	16415571	K562	FALSE
chr17	16535501	16536153	ENSG00000187688	TRPV2	16415571	K562	FALSE
chr17	17238192	17238398	ENSG00000187688	TRPV2	16415571	K562	FALSE
chr17	17239912	17240143	ENSG00000187688	TRPV2	16415571	K562	FALSE
chr17	17354812	17355365	ENSG00000187688	TRPV2	16415571	K562	FALSE
chr17	27089093	27089733	ENSG00000087095	NLK	28041737	K562	FALSE
chr17	27106551	27107062	ENSG00000087095	NLK	28041737	K562	FALSE
chr17	27356266	27356715	ENSG00000087095	NLK	28041737	K562	FALSE
chr17	27446730	27447293	ENSG00000087095	NLK	28041737	K562	FALSE
chr17	28029055	28029407	ENSG00000087095	NLK	28041737	K562	FALSE
chr17	28029055	28029407	ENSG00000132589	FLOT2	28897652	K562	FALSE
chr17	28029055	28029407	ENSG00000167536	DHRS13	28903079	K562	FALSE
chr17	28033919	28034751	ENSG00000087095	NLK	28041737	K562	FALSE
chr17	28033919	28034751	ENSG00000132589	FLOT2	28897652	K562	FALSE
chr17	28033919	28034751	ENSG00000167536	DHRS13	28903079	K562	FALSE
chr17	28646763	28647105	ENSG00000087095	NLK	28041737	K562	FALSE
chr17	28646763	28647105	ENSG00000132589	FLOT2	28897652	K562	FALSE
chr17	28646763	28647105	ENSG00000167536	DHRS13	28903079	K562	FALSE
chr17	28872738	28873142	ENSG00000087095	NLK	28041737	K562	FALSE
chr17	28872738	28873142	ENSG00000132589	FLOT2	28897652	K562	FALSE
chr17	28872738	28873142	ENSG00000167536	DHRS13	28903079	K562	FALSE
chr17	29237478	29237628	ENSG00000132589	FLOT2	28897652	K562	FALSE
chr17	29237478	29237628	ENSG00000167536	DHRS13	28903079	K562	FALSE
chr17	29243802	29244037	ENSG00000132589	FLOT2	28897652	K562	FALSE
chr17	29243802	29244037	ENSG00000167536	DHRS13	28903079	K562	FALSE
chr17	32882788	32883094	ENSG00000006042	TMEM98	32927910	K562	FALSE
chr17	32894227	32894587	ENSG00000006042	TMEM98	32927910	K562	FALSE
chr17	32909850	32910388	ENSG00000006042	TMEM98	32927910	K562	FALSE
chr17	32910854	32911025	ENSG00000006042	TMEM98	32927910	K562	FALSE
chr17	32962253	32962655	ENSG00000006042	TMEM98	32927910	K562	FALSE
chr17	38700994	38701159	ENSG00000161395	PGAP3	39688057	K562	FALSE
chr17	38868148	38868569	ENSG00000161395	PGAP3	39688057	K562	FALSE
chr17	39001826	39002005	ENSG00000161395	PGAP3	39688057	K562	FALSE
chr17	39014500	39014968	ENSG00000161395	PGAP3	39688057	K562	FALSE
chr17	39206448	39206782	ENSG00000161395	PGAP3	39688057	K562	FALSE
chr17	39617627	39618434	ENSG00000161395	PGAP3	39688057	K562	FALSE
chr17	39617627	39618434	ENSG00000141753	IGFBP4	40443450	K562	FALSE
chr17	40005504	40005892	ENSG00000161395	PGAP3	39688057	K562	FALSE
chr17	40005504	40005892	ENSG00000141753	IGFBP4	40443450	K562	FALSE
chr17	40111287	40112101	ENSG00000161395	PGAP3	39688057	K562	FALSE
chr17	40111287	40112101	ENSG00000141753	IGFBP4	40443450	K562	FALSE
chr17	40437250	40437938	ENSG00000161395	PGAP3	39688057	K562	FALSE
chr17	40437250	40437938	ENSG00000141753	IGFBP4	40443450	K562	FALSE
chr17	40533194	40533886	ENSG00000161395	PGAP3	39688057	K562	FALSE
chr17	40533194	40533886	ENSG00000141753	IGFBP4	40443450	K562	FALSE
chr17	40533194	40533886	ENSG00000171345	KRT19	41528308	K562	FALSE
chr17	40816667	40816848	ENSG00000141753	IGFBP4	40443450	K562	FALSE
chr17	40816667	40816848	ENSG00000171345	KRT19	41528308	K562	FALSE
chr17	40816667	40816848	ENSG00000173801	JUP	41785155	K562	FALSE
chr17	40844696	40844943	ENSG00000141753	IGFBP4	40443450	K562	FALSE
chr17	40844696	40844943	ENSG00000171345	KRT19	41528308	K562	FALSE
chr17	40844696	40844943	ENSG00000173801	JUP	41785155	K562	FALSE
chr17	41678368	41679570	ENSG00000171345	KRT19	41528308	K562	FALSE
chr17	41678368	41679570	ENSG00000173801	JUP	41785155	K562	FALSE
chr17	41678368	41679570	ENSG00000173757	STAT5B	42276391	K562	FALSE
chr17	41697299	41697628	ENSG00000171345	KRT19	41528308	K562	FALSE
chr17	41697299	41697628	ENSG00000173801	JUP	41785155	K562	FALSE
chr17	41697299	41697628	ENSG00000173757	STAT5B	42276391	K562	FALSE
chr17	41737779	41738979	ENSG00000171345	KRT19	41528308	K562	FALSE
chr17	41737779	41738979	ENSG00000173801	JUP	41785155	K562	FALSE
chr17	41737779	41738979	ENSG00000173757	STAT5B	42276391	K562	FALSE
chr17	42283699	42283921	ENSG00000171345	KRT19	41528308	K562	FALSE
chr17	42283699	42283921	ENSG00000173801	JUP	41785155	K562	FALSE
chr17	42283699	42283921	ENSG00000173757	STAT5B	42276391	K562	FALSE
chr17	42283699	42283921	ENSG00000184988	TMEM106A	43211835	K562	FALSE
chr17	42456507	42457152	ENSG00000171345	KRT19	41528308	K562	FALSE
chr17	42456507	42457152	ENSG00000173801	JUP	41785155	K562	FALSE
chr17	42456507	42457152	ENSG00000173757	STAT5B	42276391	K562	FALSE
chr17	42456507	42457152	ENSG00000184988	TMEM106A	43211835	K562	FALSE
chr17	42624124	42624638	ENSG00000173801	JUP	41785155	K562	FALSE
chr17	42624124	42624638	ENSG00000173757	STAT5B	42276391	K562	FALSE
chr17	42624124	42624638	ENSG00000184988	TMEM106A	43211835	K562	FALSE
chr17	42629754	42629937	ENSG00000173801	JUP	41785155	K562	FALSE
chr17	42629754	42629937	ENSG00000173757	STAT5B	42276391	K562	FALSE
chr17	42629754	42629937	ENSG00000184988	TMEM106A	43211835	K562	FALSE
chr17	42632930	42633471	ENSG00000173801	JUP	41785155	K562	FALSE
chr17	42632930	42633471	ENSG00000173757	STAT5B	42276391	K562	FALSE
chr17	42632930	42633471	ENSG00000184988	TMEM106A	43211835	K562	FALSE
chr17	42928601	42929651	ENSG00000173757	STAT5B	42276391	K562	FALSE
chr17	42928601	42929651	ENSG00000184988	TMEM106A	43211835	K562	FALSE
chr17	43315031	43316574	ENSG00000184988	TMEM106A	43211835	K562	FALSE
chr17	43315031	43316574	ENSG00000004939	SLC4A1	44268135	K562	FALSE
chr17	44132270	44132707	ENSG00000184988	TMEM106A	43211835	K562	FALSE
chr17	44132270	44132707	ENSG00000004939	SLC4A1	44268135	K562	FALSE
chr17	44132270	44132707	ENSG00000013306	SLC25A39	44324870	K562	FALSE
chr17	44137954	44138661	ENSG00000184988	TMEM106A	43211835	K562	FALSE
chr17	44137954	44138661	ENSG00000004939	SLC4A1	44268135	K562	FALSE
chr17	44137954	44138661	ENSG00000013306	SLC25A39	44324870	K562	FALSE
chr17	44245979	44246409	ENSG00000004939	SLC4A1	44268135	K562	FALSE
chr17	44245979	44246409	ENSG00000013306	SLC25A39	44324870	K562	FALSE
chr17	44393236	44393734	ENSG00000004939	SLC4A1	44268135	K562	FALSE
chr17	44393236	44393734	ENSG00000013306	SLC25A39	44324870	K562	FALSE
chr17	44511410	44511678	ENSG00000004939	SLC4A1	44268135	K562	FALSE
chr17	44511410	44511678	ENSG00000013306	SLC25A39	44324870	K562	FALSE
chr17	44511760	44512175	ENSG00000004939	SLC4A1	44268135	K562	FALSE
chr17	44511760	44512175	ENSG00000013306	SLC25A39	44324870	K562	FALSE
chr17	44523134	44523624	ENSG00000004939	SLC4A1	44268135	K562	FALSE
chr17	44523134	44523624	ENSG00000013306	SLC25A39	44324870	K562	FALSE
chr17	44972321	44972450	ENSG00000004939	SLC4A1	44268135	K562	FALSE
chr17	44972321	44972450	ENSG00000013306	SLC25A39	44324870	K562	FALSE
chr17	44991753	44991897	ENSG00000004939	SLC4A1	44268135	K562	FALSE
chr17	44991753	44991897	ENSG00000013306	SLC25A39	44324870	K562	FALSE
chr17	45018707	45019785	ENSG00000004939	SLC4A1	44268135	K562	FALSE
chr17	45018707	45019785	ENSG00000013306	SLC25A39	44324870	K562	FALSE
chr17	45320911	45321383	ENSG00000013306	SLC25A39	44324870	K562	FALSE
chr17	46905523	46906358	ENSG00000198336	MYL4	47200446	K562	FALSE
chr17	46905523	46906358	ENSG00000189120	SP6	47855874	K562	FALSE
chr17	47239791	47240577	ENSG00000198336	MYL4	47200446	K562	FALSE
chr17	47239791	47240577	ENSG00000189120	SP6	47855874	K562	FALSE
chr17	47240928	47241199	ENSG00000198336	MYL4	47200446	K562	FALSE
chr17	47240928	47241199	ENSG00000189120	SP6	47855874	K562	FALSE
chr17	47719460	47719922	ENSG00000198336	MYL4	47200446	K562	FALSE
chr17	47719460	47719922	ENSG00000189120	SP6	47855874	K562	FALSE
chr17	48002560	48002931	ENSG00000198336	MYL4	47200446	K562	FALSE
chr17	48002560	48002931	ENSG00000189120	SP6	47855874	K562	FALSE
chr17	48442834	48443210	ENSG00000189120	SP6	47855874	K562	FALSE
chr17	48442834	48443210	ENSG00000167085	PHB	49414802	K562	FALSE
chr17	48486658	48486860	ENSG00000189120	SP6	47855874	K562	FALSE
chr17	48486658	48486860	ENSG00000167085	PHB	49414802	K562	FALSE
chr17	48488657	48489162	ENSG00000189120	SP6	47855874	K562	FALSE
chr17	48488657	48489162	ENSG00000167085	PHB	49414802	K562	FALSE
chr17	48491719	48491947	ENSG00000189120	SP6	47855874	K562	FALSE
chr17	48491719	48491947	ENSG00000167085	PHB	49414802	K562	FALSE
chr17	48519542	48519878	ENSG00000189120	SP6	47855874	K562	FALSE
chr17	48519542	48519878	ENSG00000167085	PHB	49414802	K562	FALSE
chr17	48521955	48522633	ENSG00000189120	SP6	47855874	K562	FALSE
chr17	48521955	48522633	ENSG00000167085	PHB	49414802	K562	FALSE
chr17	48972239	48972862	ENSG00000167085	PHB	49414802	K562	FALSE
chr17	48973845	48974188	ENSG00000167085	PHB	49414802	K562	FALSE
chr17	48991024	48991370	ENSG00000167085	PHB	49414802	K562	FALSE
chr17	49191750	49193264	ENSG00000167085	PHB	49414802	K562	FALSE
chr17	49191750	49193264	ENSG00000108819	PPP1R9B	50150677	K562	FALSE
chr17	49193868	49194160	ENSG00000167085	PHB	49414802	K562	FALSE
chr17	49193868	49194160	ENSG00000108819	PPP1R9B	50150677	K562	FALSE
chr17	50155064	50155362	ENSG00000167085	PHB	49414802	K562	FALSE
chr17	50155064	50155362	ENSG00000108819	PPP1R9B	50150677	K562	FALSE
chr17	50155064	50155362	ENSG00000108829	LRRC59	50385134	K562	FALSE
chr17	50206933	50207364	ENSG00000167085	PHB	49414802	K562	FALSE
chr17	50206933	50207364	ENSG00000108819	PPP1R9B	50150677	K562	FALSE
chr17	50206933	50207364	ENSG00000108829	LRRC59	50385134	K562	FALSE
chr17	50289955	50290483	ENSG00000167085	PHB	49414802	K562	FALSE
chr17	50289955	50290483	ENSG00000108819	PPP1R9B	50150677	K562	FALSE
chr17	50289955	50290483	ENSG00000108829	LRRC59	50385134	K562	FALSE
chr17	50817193	50817665	ENSG00000108819	PPP1R9B	50150677	K562	FALSE
chr17	50817193	50817665	ENSG00000108829	LRRC59	50385134	K562	FALSE
chr17	50933523	50933869	ENSG00000108819	PPP1R9B	50150677	K562	FALSE
chr17	50933523	50933869	ENSG00000108829	LRRC59	50385134	K562	FALSE
chr17	54860707	54861677	ENSG00000141179	PCTP	55751051	K562	FALSE
chr17	54864614	54864917	ENSG00000141179	PCTP	55751051	K562	FALSE
chr17	55344440	55344860	ENSG00000141179	PCTP	55751051	K562	FALSE
chr17	55567131	55568256	ENSG00000141179	PCTP	55751051	K562	FALSE
chr17	55576206	55577063	ENSG00000141179	PCTP	55751051	K562	FALSE
chr17	55735920	55736020	ENSG00000141179	PCTP	55751051	K562	FALSE
chr17	55743141	55743364	ENSG00000141179	PCTP	55751051	K562	FALSE
chr17	62995110	62995685	ENSG00000198909	MAP3K3	63622415	K562	FALSE
chr17	62995110	62995685	ENSG00000108604	SMARCD2	63842685	K562	FALSE
chr17	63460773	63461217	ENSG00000198909	MAP3K3	63622415	K562	FALSE
chr17	63460773	63461217	ENSG00000108604	SMARCD2	63842685	K562	FALSE
chr17	63460773	63461217	ENSG00000108622	ICAM2	64020625	K562	FALSE
chr17	64022644	64022894	ENSG00000198909	MAP3K3	63622415	K562	FALSE
chr17	64022644	64022894	ENSG00000108604	SMARCD2	63842685	K562	FALSE
chr17	64022644	64022894	ENSG00000108622	ICAM2	64020625	K562	FALSE
chr17	64323867	64324117	ENSG00000198909	MAP3K3	63622415	K562	FALSE
chr17	64323867	64324117	ENSG00000108604	SMARCD2	63842685	K562	FALSE
chr17	64323867	64324117	ENSG00000108622	ICAM2	64020625	K562	FALSE
chr17	64331754	64332438	ENSG00000198909	MAP3K3	63622415	K562	FALSE
chr17	64331754	64332438	ENSG00000108604	SMARCD2	63842685	K562	FALSE
chr17	64331754	64332438	ENSG00000108622	ICAM2	64020625	K562	FALSE
chr17	64708910	64709993	ENSG00000108604	SMARCD2	63842685	K562	FALSE
chr17	64708910	64709993	ENSG00000108622	ICAM2	64020625	K562	FALSE
chr17	64922871	64923365	ENSG00000108622	ICAM2	64020625	K562	FALSE
chr17	73952737	73953156	ENSG00000161513	FDXR	74873013	K562	FALSE
chr17	74163444	74164014	ENSG00000161513	FDXR	74873013	K562	FALSE
chr17	74463226	74463933	ENSG00000161513	FDXR	74873013	K562	FALSE
chr17	74493338	74493717	ENSG00000161513	FDXR	74873013	K562	FALSE
chr17	74514060	74515085	ENSG00000161513	FDXR	74873013	K562	FALSE
chr17	75071896	75072368	ENSG00000161513	FDXR	74873013	K562	FALSE
chr17	75858702	75859225	ENSG00000161513	FDXR	74873013	K562	FALSE
chr17	77834140	77835315	ENSG00000184557	SOCS3	78360077	K562	FALSE
chr17	77834140	77835315	ENSG00000108669	CYTH1	78717025	K562	FALSE
chr17	77875803	77876490	ENSG00000184557	SOCS3	78360077	K562	FALSE
chr17	77875803	77876490	ENSG00000108669	CYTH1	78717025	K562	FALSE
chr17	77924939	77925294	ENSG00000184557	SOCS3	78360077	K562	FALSE
chr17	77924939	77925294	ENSG00000108669	CYTH1	78717025	K562	FALSE
chr17	78289745	78290203	ENSG00000184557	SOCS3	78360077	K562	FALSE
chr17	78289745	78290203	ENSG00000108669	CYTH1	78717025	K562	FALSE
chr17	78301151	78301519	ENSG00000184557	SOCS3	78360077	K562	FALSE
chr17	78301151	78301519	ENSG00000108669	CYTH1	78717025	K562	FALSE
chr17	78592101	78592813	ENSG00000184557	SOCS3	78360077	K562	FALSE
chr17	78592101	78592813	ENSG00000108669	CYTH1	78717025	K562	FALSE
chr17	78665605	78666752	ENSG00000184557	SOCS3	78360077	K562	FALSE
chr17	78665605	78666752	ENSG00000108669	CYTH1	78717025	K562	FALSE
chr17	78783805	78784325	ENSG00000184557	SOCS3	78360077	K562	FALSE
chr17	78783805	78784325	ENSG00000108669	CYTH1	78717025	K562	FALSE
chr17	78937606	78937958	ENSG00000184557	SOCS3	78360077	K562	FALSE
chr17	78937606	78937958	ENSG00000108669	CYTH1	78717025	K562	FALSE
chr17	78985990	78986358	ENSG00000184557	SOCS3	78360077	K562	FALSE
chr17	78985990	78986358	ENSG00000108669	CYTH1	78717025	K562	FALSE
chr17	78986664	78987331	ENSG00000184557	SOCS3	78360077	K562	FALSE
chr17	78986664	78987331	ENSG00000108669	CYTH1	78717025	K562	FALSE
chr17	79701866	79702513	ENSG00000108669	CYTH1	78717025	K562	FALSE
chr17	79701866	79702513	ENSG00000181045	SLC26A11	80219699	K562	FALSE
chr17	79701866	79702513	ENSG00000173821	RNF213	80260866	K562	FALSE
chr17	79749922	79750372	ENSG00000108669	CYTH1	78717025	K562	FALSE
chr17	79749922	79750372	ENSG00000181045	SLC26A11	80219699	K562	FALSE
chr17	79749922	79750372	ENSG00000173821	RNF213	80260866	K562	FALSE
chr17	79829053	79829282	ENSG00000181045	SLC26A11	80219699	K562	FALSE
chr17	79829053	79829282	ENSG00000173821	RNF213	80260866	K562	FALSE
chr17	79830334	79830717	ENSG00000181045	SLC26A11	80219699	K562	FALSE
chr17	79830334	79830717	ENSG00000173821	RNF213	80260866	K562	FALSE
chr17	79830896	79831146	ENSG00000181045	SLC26A11	80219699	K562	FALSE
chr17	79830896	79831146	ENSG00000173821	RNF213	80260866	K562	FALSE
chr17	79907932	79908202	ENSG00000181045	SLC26A11	80219699	K562	FALSE
chr17	79907932	79908202	ENSG00000173821	RNF213	80260866	K562	FALSE
chr17	80455770	80457918	ENSG00000181045	SLC26A11	80219699	K562	FALSE
chr17	80455770	80457918	ENSG00000173821	RNF213	80260866	K562	FALSE
chr17	81336950	81337205	ENSG00000185624	P4HB	81860535	K562	FALSE
chr17	81336950	81337205	ENSG00000169750	RAC3	82031678	K562	FALSE
chr17	81342914	81343778	ENSG00000185624	P4HB	81860535	K562	FALSE
chr17	81342914	81343778	ENSG00000169750	RAC3	82031678	K562	FALSE
chr17	81349766	81350580	ENSG00000185624	P4HB	81860535	K562	FALSE
chr17	81349766	81350580	ENSG00000169750	RAC3	82031678	K562	FALSE
chr17	81392871	81394467	ENSG00000185624	P4HB	81860535	K562	FALSE
chr17	81392871	81394467	ENSG00000169750	RAC3	82031678	K562	FALSE
chr17	81487630	81488755	ENSG00000185624	P4HB	81860535	K562	FALSE
chr17	81487630	81488755	ENSG00000169750	RAC3	82031678	K562	FALSE
chr17	81722254	81722862	ENSG00000185624	P4HB	81860535	K562	FALSE
chr17	81722254	81722862	ENSG00000169750	RAC3	82031678	K562	FALSE
chr17	81735426	81736258	ENSG00000185624	P4HB	81860535	K562	FALSE
chr17	81735426	81736258	ENSG00000169750	RAC3	82031678	K562	FALSE
chr17	82287984	82288472	ENSG00000185624	P4HB	81860535	K562	FALSE
chr17	82287984	82288472	ENSG00000169750	RAC3	82031678	K562	FALSE
chr17	82301653	82302513	ENSG00000185624	P4HB	81860535	K562	FALSE
chr17	82301653	82302513	ENSG00000169750	RAC3	82031678	K562	FALSE
chr17	82338768	82340280	ENSG00000185624	P4HB	81860535	K562	FALSE
chr17	82338768	82340280	ENSG00000169750	RAC3	82031678	K562	FALSE
chr17	82343738	82343805	ENSG00000185624	P4HB	81860535	K562	FALSE
chr17	82343738	82343805	ENSG00000169750	RAC3	82031678	K562	FALSE
chr17	82344504	82345785	ENSG00000185624	P4HB	81860535	K562	FALSE
chr17	82344504	82345785	ENSG00000169750	RAC3	82031678	K562	FALSE
chr17	82494159	82495097	ENSG00000185624	P4HB	81860535	K562	FALSE
chr17	82494159	82495097	ENSG00000169750	RAC3	82031678	K562	FALSE
chr18	10565448	10565803	ENSG00000168461	RAB31	9708301	K562	FALSE
chr18	11925765	11926216	ENSG00000141401	IMPA2	11981025	K562	FALSE
chr18	11951500	11951885	ENSG00000141401	IMPA2	11981025	K562	FALSE
chr18	11953199	11953444	ENSG00000141401	IMPA2	11981025	K562	FALSE
chr18	11955679	11955993	ENSG00000141401	IMPA2	11981025	K562	FALSE
chr18	12403840	12404255	ENSG00000141401	IMPA2	11981025	K562	FALSE
chr18	12726945	12727410	ENSG00000141401	IMPA2	11981025	K562	FALSE
chr18	49524301	49524796	ENSG00000154839	SKA1	50375046	K562	FALSE
chr18	49726205	49726468	ENSG00000154839	SKA1	50375046	K562	FALSE
chr18	49768116	49768274	ENSG00000154839	SKA1	50375046	K562	FALSE
chr18	50358788	50359253	ENSG00000154839	SKA1	50375046	K562	FALSE
chr18	50396019	50396386	ENSG00000154839	SKA1	50375046	K562	FALSE
chr18	50839911	50840498	ENSG00000154839	SKA1	50375046	K562	FALSE
chr18	50841812	50842185	ENSG00000154839	SKA1	50375046	K562	FALSE
chr18	57819960	57820466	ENSG00000049759	NEDD4L	58044226	K562	FALSE
chr18	57832722	57833057	ENSG00000049759	NEDD4L	58044226	K562	FALSE
chr18	57846249	57846710	ENSG00000049759	NEDD4L	58044226	K562	FALSE
chr18	57921817	57922096	ENSG00000049759	NEDD4L	58044226	K562	FALSE
chr18	59070454	59070776	ENSG00000049759	NEDD4L	58044226	K562	FALSE
chr18	74242422	74243210	ENSG00000187773	DIPK1C	74457268	K562	FALSE
chr18	74460071	74460132	ENSG00000187773	DIPK1C	74457268	K562	FALSE
chr18	74488357	74489311	ENSG00000187773	DIPK1C	74457268	K562	FALSE
chr19	10236099	10236585	ENSG00000197961	ZNF121	9584497	K562	FALSE
chr19	10236099	10236585	ENSG00000105376	ICAM5	10289952	K562	FALSE
chr19	10236099	10236585	ENSG00000076662	ICAM3	10339624	K562	FALSE
chr19	10541409	10541825	ENSG00000197961	ZNF121	9584497	K562	FALSE
chr19	10541409	10541825	ENSG00000105376	ICAM5	10289952	K562	FALSE
chr19	10541409	10541825	ENSG00000076662	ICAM3	10339624	K562	FALSE
chr19	11085483	11085805	ENSG00000105376	ICAM5	10289952	K562	FALSE
chr19	11085483	11085805	ENSG00000076662	ICAM3	10339624	K562	FALSE
chr19	11085483	11085805	ENSG00000196757	ZNF700	11925107	K562	FALSE
chr19	11160116	11160532	ENSG00000105376	ICAM5	10289952	K562	FALSE
chr19	11160116	11160532	ENSG00000076662	ICAM3	10339624	K562	FALSE
chr19	11160116	11160532	ENSG00000196757	ZNF700	11925107	K562	FALSE
chr19	11923577	11924030	ENSG00000196757	ZNF700	11925107	K562	FALSE
chr19	11985100	11985218	ENSG00000196757	ZNF700	11925107	K562	FALSE
chr19	13162701	13164815	ENSG00000104907	TRMT1	13116649	K562	FALSE
chr19	13167434	13168091	ENSG00000104907	TRMT1	13116649	K562	FALSE
chr19	13717245	13717770	ENSG00000104907	TRMT1	13116649	K562	FALSE
chr19	13717245	13717770	ENSG00000123159	GIPC1	14496127	K562	FALSE
chr19	13717245	13717770	ENSG00000132002	DNAJB1	14517569	K562	FALSE
chr19	13838822	13840776	ENSG00000104907	TRMT1	13116649	K562	FALSE
chr19	13838822	13840776	ENSG00000123159	GIPC1	14496127	K562	FALSE
chr19	13838822	13840776	ENSG00000132002	DNAJB1	14517569	K562	FALSE
chr19	13841132	13841363	ENSG00000104907	TRMT1	13116649	K562	FALSE
chr19	13841132	13841363	ENSG00000123159	GIPC1	14496127	K562	FALSE
chr19	13841132	13841363	ENSG00000132002	DNAJB1	14517569	K562	FALSE
chr19	13846456	13848222	ENSG00000104907	TRMT1	13116649	K562	FALSE
chr19	13846456	13848222	ENSG00000123159	GIPC1	14496127	K562	FALSE
chr19	13846456	13848222	ENSG00000132002	DNAJB1	14517569	K562	FALSE
chr19	13850201	13850821	ENSG00000104907	TRMT1	13116649	K562	FALSE
chr19	13850201	13850821	ENSG00000123159	GIPC1	14496127	K562	FALSE
chr19	13850201	13850821	ENSG00000132002	DNAJB1	14517569	K562	FALSE
chr19	13851134	13851588	ENSG00000104907	TRMT1	13116649	K562	FALSE
chr19	13851134	13851588	ENSG00000123159	GIPC1	14496127	K562	FALSE
chr19	13851134	13851588	ENSG00000132002	DNAJB1	14517569	K562	FALSE
chr19	14227747	14228888	ENSG00000123159	GIPC1	14496127	K562	FALSE
chr19	14227747	14228888	ENSG00000132002	DNAJB1	14517569	K562	FALSE
chr19	14294961	14295387	ENSG00000123159	GIPC1	14496127	K562	FALSE
chr19	14294961	14295387	ENSG00000132002	DNAJB1	14517569	K562	FALSE
chr19	14372415	14372762	ENSG00000123159	GIPC1	14496127	K562	FALSE
chr19	14372415	14372762	ENSG00000132002	DNAJB1	14517569	K562	FALSE
chr19	14425766	14426059	ENSG00000123159	GIPC1	14496127	K562	FALSE
chr19	14425766	14426059	ENSG00000132002	DNAJB1	14517569	K562	FALSE
chr19	14507718	14508085	ENSG00000123159	GIPC1	14496127	K562	FALSE
chr19	14507718	14508085	ENSG00000132002	DNAJB1	14517569	K562	FALSE
chr19	14574196	14574693	ENSG00000123159	GIPC1	14496127	K562	FALSE
chr19	14574196	14574693	ENSG00000132002	DNAJB1	14517569	K562	FALSE
chr19	14614125	14614364	ENSG00000123159	GIPC1	14496127	K562	FALSE
chr19	14614125	14614364	ENSG00000132002	DNAJB1	14517569	K562	FALSE
chr19	14783553	14784034	ENSG00000123159	GIPC1	14496127	K562	FALSE
chr19	14783553	14784034	ENSG00000132002	DNAJB1	14517569	K562	FALSE
chr19	14784777	14785570	ENSG00000123159	GIPC1	14496127	K562	FALSE
chr19	14784777	14785570	ENSG00000132002	DNAJB1	14517569	K562	FALSE
chr19	16885199	16885387	ENSG00000130303	BST2	17405630	K562	FALSE
chr19	17289437	17289954	ENSG00000130303	BST2	17405630	K562	FALSE
chr19	17289437	17289954	ENSG00000105642	KCNN1	17951293	K562	FALSE
chr19	17289437	17289954	ENSG00000130522	JUND	18281622	K562	FALSE
chr19	18045009	18045412	ENSG00000130303	BST2	17405630	K562	FALSE
chr19	18045009	18045412	ENSG00000105642	KCNN1	17951293	K562	FALSE
chr19	18045009	18045412	ENSG00000130522	JUND	18281622	K562	FALSE
chr19	18045009	18045412	ENSG00000130511	SSBP4	18418864	K562	FALSE
chr19	18045009	18045412	ENSG00000105655	ISYNA1	18438111	K562	FALSE
chr19	18303424	18303837	ENSG00000130303	BST2	17405630	K562	FALSE
chr19	18303424	18303837	ENSG00000105642	KCNN1	17951293	K562	FALSE
chr19	18303424	18303837	ENSG00000130522	JUND	18281622	K562	FALSE
chr19	18303424	18303837	ENSG00000130511	SSBP4	18418864	K562	FALSE
chr19	18303424	18303837	ENSG00000105655	ISYNA1	18438111	K562	FALSE
chr19	18408151	18408565	ENSG00000105642	KCNN1	17951293	K562	FALSE
chr19	18408151	18408565	ENSG00000130522	JUND	18281622	K562	FALSE
chr19	18408151	18408565	ENSG00000130511	SSBP4	18418864	K562	FALSE
chr19	18408151	18408565	ENSG00000105655	ISYNA1	18438111	K562	FALSE
chr19	19062504	19062738	ENSG00000130522	JUND	18281622	K562	FALSE
chr19	19062504	19062738	ENSG00000130511	SSBP4	18418864	K562	FALSE
chr19	19062504	19062738	ENSG00000105655	ISYNA1	18438111	K562	FALSE
chr19	19364871	19365268	ENSG00000130511	SSBP4	18418864	K562	FALSE
chr19	19364871	19365268	ENSG00000105655	ISYNA1	18438111	K562	FALSE
chr19	19366710	19367252	ENSG00000130511	SSBP4	18418864	K562	FALSE
chr19	19366710	19367252	ENSG00000105655	ISYNA1	18438111	K562	FALSE
chr19	19373033	19373435	ENSG00000130511	SSBP4	18418864	K562	FALSE
chr19	19373033	19373435	ENSG00000105655	ISYNA1	18438111	K562	FALSE
chr19	21602900	21603130	ENSG00000196705	ZNF431	21142024	K562	FALSE
chr19	21627038	21627293	ENSG00000196705	ZNF431	21142024	K562	FALSE
chr19	34712658	34713054	ENSG00000161249	DMKN	35497933	K562	FALSE
chr19	34731177	34731915	ENSG00000161249	DMKN	35497933	K562	FALSE
chr19	34870003	34870351	ENSG00000161249	DMKN	35497933	K562	FALSE
chr19	34973082	34973631	ENSG00000161249	DMKN	35497933	K562	FALSE
chr19	34975932	34976245	ENSG00000161249	DMKN	35497933	K562	FALSE
chr19	35210802	35211081	ENSG00000161249	DMKN	35497933	K562	FALSE
chr19	35220201	35221007	ENSG00000161249	DMKN	35497933	K562	FALSE
chr19	35317609	35317703	ENSG00000161249	DMKN	35497933	K562	FALSE
chr19	35389509	35389670	ENSG00000161249	DMKN	35497933	K562	FALSE
chr19	35819869	35820381	ENSG00000161249	DMKN	35497933	K562	FALSE
chr19	36127572	36128704	ENSG00000161249	DMKN	35497933	K562	FALSE
chr19	38209677	38209826	ENSG00000104835	SARS2	38916046	K562	FALSE
chr19	39045980	39046522	ENSG00000104835	SARS2	38916046	K562	FALSE
chr19	39045980	39046522	ENSG00000090932	DLL3	39498895	K562	FALSE
chr19	39252629	39253005	ENSG00000104835	SARS2	38916046	K562	FALSE
chr19	39252629	39253005	ENSG00000090932	DLL3	39498895	K562	FALSE
chr19	39430597	39431344	ENSG00000104835	SARS2	38916046	K562	FALSE
chr19	39430597	39431344	ENSG00000090932	DLL3	39498895	K562	FALSE
chr19	39766678	39767036	ENSG00000104835	SARS2	38916046	K562	FALSE
chr19	39766678	39767036	ENSG00000090932	DLL3	39498895	K562	FALSE
chr19	40417019	40417519	ENSG00000090932	DLL3	39498895	K562	FALSE
chr19	40433656	40434451	ENSG00000090932	DLL3	39498895	K562	FALSE
chr19	40445824	40446338	ENSG00000090932	DLL3	39498895	K562	FALSE
chr19	43457720	43458057	ENSG00000104783	KCNN4	43768977	K562	FALSE
chr19	43759653	43759752	ENSG00000104783	KCNN4	43768977	K562	FALSE
chr19	43782412	43782517	ENSG00000104783	KCNN4	43768977	K562	FALSE
chr19	43784325	43784884	ENSG00000104783	KCNN4	43768977	K562	FALSE
chr19	44722148	44722297	ENSG00000104783	KCNN4	43768977	K562	FALSE
chr19	44741678	44742336	ENSG00000104783	KCNN4	43768977	K562	FALSE
chr19	46629051	46629436	ENSG00000105327	BBC3	47222568	K562	FALSE
chr19	46629051	46629436	ENSG00000257704	INAFM1	47274885	K562	FALSE
chr19	46629684	46630097	ENSG00000105327	BBC3	47222568	K562	FALSE
chr19	46629684	46630097	ENSG00000257704	INAFM1	47274885	K562	FALSE
chr19	46862418	46862577	ENSG00000105327	BBC3	47222568	K562	FALSE
chr19	46862418	46862577	ENSG00000257704	INAFM1	47274885	K562	FALSE
chr19	46863102	46863386	ENSG00000105327	BBC3	47222568	K562	FALSE
chr19	46863102	46863386	ENSG00000257704	INAFM1	47274885	K562	FALSE
chr19	47241009	47241506	ENSG00000105327	BBC3	47222568	K562	FALSE
chr19	47241009	47241506	ENSG00000257704	INAFM1	47274885	K562	FALSE
chr19	47242956	47243584	ENSG00000105327	BBC3	47222568	K562	FALSE
chr19	47242956	47243584	ENSG00000257704	INAFM1	47274885	K562	FALSE
chr19	47247458	47247711	ENSG00000105327	BBC3	47222568	K562	FALSE
chr19	47247458	47247711	ENSG00000257704	INAFM1	47274885	K562	FALSE
chr19	47324533	47324851	ENSG00000105327	BBC3	47222568	K562	FALSE
chr19	47324533	47324851	ENSG00000257704	INAFM1	47274885	K562	FALSE
chr19	47891719	47892614	ENSG00000105327	BBC3	47222568	K562	FALSE
chr19	47891719	47892614	ENSG00000257704	INAFM1	47274885	K562	FALSE
chr19	48259678	48260446	ENSG00000257704	INAFM1	47274885	K562	FALSE
chr19	48259678	48260446	ENSG00000087086	FTL	48965309	K562	FALSE
chr19	48780533	48781507	ENSG00000087086	FTL	48965309	K562	FALSE
chr19	48782563	48782686	ENSG00000087086	FTL	48965309	K562	FALSE
chr19	48951247	48951374	ENSG00000087086	FTL	48965309	K562	FALSE
chr19	48951247	48951374	ENSG00000104946	TBC1D17	49877702	K562	FALSE
chr19	48951247	48951374	ENSG00000169136	ATF5	49928702	K562	FALSE
chr19	50082267	50082612	ENSG00000104946	TBC1D17	49877702	K562	FALSE
chr19	50082267	50082612	ENSG00000169136	ATF5	49928702	K562	FALSE
chr19	50082267	50082612	ENSG00000105472	CLEC11A	50723364	K562	FALSE
chr19	50165505	50165744	ENSG00000104946	TBC1D17	49877702	K562	FALSE
chr19	50165505	50165744	ENSG00000169136	ATF5	49928702	K562	FALSE
chr19	50165505	50165744	ENSG00000105472	CLEC11A	50723364	K562	FALSE
chr19	50569431	50569767	ENSG00000104946	TBC1D17	49877702	K562	FALSE
chr19	50569431	50569767	ENSG00000169136	ATF5	49928702	K562	FALSE
chr19	50569431	50569767	ENSG00000105472	CLEC11A	50723364	K562	FALSE
chr19	50601512	50602239	ENSG00000104946	TBC1D17	49877702	K562	FALSE
chr19	50601512	50602239	ENSG00000169136	ATF5	49928702	K562	FALSE
chr19	50601512	50602239	ENSG00000105472	CLEC11A	50723364	K562	FALSE
chr19	50740054	50740407	ENSG00000104946	TBC1D17	49877702	K562	FALSE
chr19	50740054	50740407	ENSG00000169136	ATF5	49928702	K562	FALSE
chr19	50740054	50740407	ENSG00000105472	CLEC11A	50723364	K562	FALSE
chr19	50741413	50741667	ENSG00000104946	TBC1D17	49877702	K562	FALSE
chr19	50741413	50741667	ENSG00000169136	ATF5	49928702	K562	FALSE
chr19	50741413	50741667	ENSG00000105472	CLEC11A	50723364	K562	FALSE
chr19	50743168	50743465	ENSG00000104946	TBC1D17	49877702	K562	FALSE
chr19	50743168	50743465	ENSG00000169136	ATF5	49928702	K562	FALSE
chr19	50743168	50743465	ENSG00000105472	CLEC11A	50723364	K562	FALSE
chr19	50748432	50748739	ENSG00000104946	TBC1D17	49877702	K562	FALSE
chr19	50748432	50748739	ENSG00000169136	ATF5	49928702	K562	FALSE
chr19	50748432	50748739	ENSG00000105472	CLEC11A	50723364	K562	FALSE
chr19	50929821	50930302	ENSG00000105472	CLEC11A	50723364	K562	FALSE
chr19	51471186	51471311	ENSG00000105472	CLEC11A	50723364	K562	FALSE
chr19	51472947	51473331	ENSG00000105472	CLEC11A	50723364	K562	FALSE
chr19	51541749	51541951	ENSG00000105472	CLEC11A	50723364	K562	FALSE
chr19	51546647	51547098	ENSG00000105472	CLEC11A	50723364	K562	FALSE
chr19	51547737	51548132	ENSG00000105472	CLEC11A	50723364	K562	FALSE
chr19	51548442	51548794	ENSG00000105472	CLEC11A	50723364	K562	FALSE
chr19	51549592	51549918	ENSG00000105472	CLEC11A	50723364	K562	FALSE
chr19	51552927	51553699	ENSG00000105472	CLEC11A	50723364	K562	FALSE
chr19	55212436	55212824	ENSG00000108106	UBE2S	55407788	K562	FALSE
chr19	55473768	55473956	ENSG00000108106	UBE2S	55407788	K562	FALSE
chr19	55473768	55473956	ENSG00000018869	ZNF582	56393478	K562	FALSE
chr19	55547105	55547722	ENSG00000108106	UBE2S	55407788	K562	FALSE
chr19	55547105	55547722	ENSG00000018869	ZNF582	56393478	K562	FALSE
chr19	56162252	56162721	ENSG00000108106	UBE2S	55407788	K562	FALSE
chr19	56162252	56162721	ENSG00000018869	ZNF582	56393478	K562	FALSE
chr19	57099145	57099601	ENSG00000018869	ZNF582	56393478	K562	FALSE
chr2	111642884	111643317	ENSG00000144161	ZC3H8	112255042	K562	FALSE
chr2	111663125	111663953	ENSG00000144161	ZC3H8	112255042	K562	FALSE
chr2	111698631	111699546	ENSG00000144161	ZC3H8	112255042	K562	FALSE
chr2	111702042	111702681	ENSG00000144161	ZC3H8	112255042	K562	FALSE
chr2	112272738	112273104	ENSG00000144161	ZC3H8	112255042	K562	FALSE
chr2	112666703	112667238	ENSG00000144161	ZC3H8	112255042	K562	FALSE
chr2	112683740	112684327	ENSG00000144161	ZC3H8	112255042	K562	FALSE
chr2	112685365	112685524	ENSG00000144161	ZC3H8	112255042	K562	FALSE
chr2	112686367	112686949	ENSG00000144161	ZC3H8	112255042	K562	FALSE
chr2	112690912	112691142	ENSG00000144161	ZC3H8	112255042	K562	FALSE
chr2	112692448	112693009	ENSG00000144161	ZC3H8	112255042	K562	FALSE
chr2	112706071	112706676	ENSG00000144161	ZC3H8	112255042	K562	FALSE
chr2	112794109	112794532	ENSG00000144161	ZC3H8	112255042	K562	FALSE
chr2	112812683	112813185	ENSG00000144161	ZC3H8	112255042	K562	FALSE
chr2	112904904	112905272	ENSG00000144161	ZC3H8	112255042	K562	FALSE
chr2	113012665	113013240	ENSG00000144161	ZC3H8	112255042	K562	FALSE
chr2	118539417	118539557	ENSG00000163064	EN1	118847648	K562	FALSE
chr2	118721908	118722589	ENSG00000163064	EN1	118847648	K562	FALSE
chr2	118748548	118748862	ENSG00000163064	EN1	118847648	K562	FALSE
chr2	118806733	118807752	ENSG00000163064	EN1	118847648	K562	FALSE
chr2	118865073	118865484	ENSG00000163064	EN1	118847648	K562	FALSE
chr2	119011351	119011874	ENSG00000163064	EN1	118847648	K562	FALSE
chr2	119175474	119176025	ENSG00000163064	EN1	118847648	K562	FALSE
chr2	119542982	119543420	ENSG00000163064	EN1	118847648	K562	FALSE
chr2	119542982	119543420	ENSG00000144118	RALB	120240064	K562	FALSE
chr2	119702817	119703271	ENSG00000163064	EN1	118847648	K562	FALSE
chr2	119702817	119703271	ENSG00000144118	RALB	120240064	K562	FALSE
chr2	120298124	120298530	ENSG00000144118	RALB	120240064	K562	FALSE
chr2	120445424	120445794	ENSG00000144118	RALB	120240064	K562	FALSE
chr2	120521223	120521604	ENSG00000144118	RALB	120240064	K562	FALSE
chr2	121074269	121076254	ENSG00000144118	RALB	120240064	K562	FALSE
chr2	121134740	121135319	ENSG00000144118	RALB	120240064	K562	FALSE
chr2	126644712	126645056	ENSG00000136732	GYPC	126656158	K562	FALSE
chr2	126749651	126749930	ENSG00000136732	GYPC	126656158	K562	FALSE
chr2	126994252	126994812	ENSG00000136732	GYPC	126656158	K562	FALSE
chr2	131673987	131674254	ENSG00000163040	CCDC74A	131527675	K562	FALSE
chr2	131682331	131682560	ENSG00000163040	CCDC74A	131527675	K562	FALSE
chr2	132337082	132337506	ENSG00000163040	CCDC74A	131527675	K562	FALSE
chr2	132337970	132338124	ENSG00000163040	CCDC74A	131527675	K562	FALSE
chr2	144358017	144358250	ENSG00000169554	ZEB2	144430934	K562	FALSE
chr2	144580670	144581193	ENSG00000169554	ZEB2	144430934	K562	FALSE
chr2	144596247	144596597	ENSG00000169554	ZEB2	144430934	K562	FALSE
chr2	144659700	144660194	ENSG00000169554	ZEB2	144430934	K562	FALSE
chr2	145288957	145289135	ENSG00000169554	ZEB2	144430934	K562	FALSE
chr2	151766520	151766960	ENSG00000157827	FMNL2	152335174	K562	FALSE
chr2	151767511	151767967	ENSG00000157827	FMNL2	152335174	K562	FALSE
chr2	151782613	151782992	ENSG00000157827	FMNL2	152335174	K562	FALSE
chr2	152200476	152200986	ENSG00000157827	FMNL2	152335174	K562	FALSE
chr2	171244615	171244992	ENSG00000071967	CYBRD1	171522247	K562	FALSE
chr2	189505524	189505694	ENSG00000198130	HIBCH	190205232	K562	FALSE
chr2	189505788	189506106	ENSG00000198130	HIBCH	190205232	K562	FALSE
chr2	189506406	189507046	ENSG00000198130	HIBCH	190205232	K562	FALSE
chr2	189516594	189516849	ENSG00000198130	HIBCH	190205232	K562	FALSE
chr2	189549073	189549360	ENSG00000198130	HIBCH	190205232	K562	FALSE
chr2	189613082	189613457	ENSG00000198130	HIBCH	190205232	K562	FALSE
chr2	190378672	190379230	ENSG00000198130	HIBCH	190205232	K562	FALSE
chr2	190379390	190379529	ENSG00000198130	HIBCH	190205232	K562	FALSE
chr2	190380937	190381381	ENSG00000198130	HIBCH	190205232	K562	FALSE
chr2	190404464	190404985	ENSG00000198130	HIBCH	190205232	K562	FALSE
chr2	190578482	190579037	ENSG00000198130	HIBCH	190205232	K562	FALSE
chr2	190580081	190580613	ENSG00000198130	HIBCH	190205232	K562	FALSE
chr2	191165215	191165361	ENSG00000198130	HIBCH	190205232	K562	FALSE
chr2	191165215	191165361	ENSG00000173559	NABP1	191678068	K562	FALSE
chr2	191557824	191558449	ENSG00000173559	NABP1	191678068	K562	FALSE
chr2	191565600	191565979	ENSG00000173559	NABP1	191678068	K562	FALSE
chr2	191566208	191566710	ENSG00000173559	NABP1	191678068	K562	FALSE
chr2	191571144	191571829	ENSG00000173559	NABP1	191678068	K562	FALSE
chr2	191637477	191638088	ENSG00000173559	NABP1	191678068	K562	FALSE
chr2	191638568	191638856	ENSG00000173559	NABP1	191678068	K562	FALSE
chr2	191646155	191646418	ENSG00000173559	NABP1	191678068	K562	FALSE
chr2	191647968	191648205	ENSG00000173559	NABP1	191678068	K562	FALSE
chr2	191675925	191676115	ENSG00000173559	NABP1	191678068	K562	FALSE
chr2	219045952	219046314	ENSG00000123989	CHPF	219543097	K562	FALSE
chr2	219595256	219595652	ENSG00000123989	CHPF	219543097	K562	FALSE
chr2	219661348	219661683	ENSG00000123989	CHPF	219543097	K562	FALSE
chr2	229716028	229716156	ENSG00000135932	CAB39	230712842	K562	FALSE
chr2	230650542	230651059	ENSG00000135932	CAB39	230712842	K562	FALSE
chr2	230656688	230657212	ENSG00000135932	CAB39	230712842	K562	FALSE
chr2	230660593	230660851	ENSG00000135932	CAB39	230712842	K562	FALSE
chr2	230667294	230667604	ENSG00000135932	CAB39	230712842	K562	FALSE
chr2	230711326	230711627	ENSG00000135932	CAB39	230712842	K562	FALSE
chr2	231515661	231516056	ENSG00000135932	CAB39	230712842	K562	FALSE
chr2	231664949	231665331	ENSG00000135932	CAB39	230712842	K562	FALSE
chr2	231666006	231667222	ENSG00000135932	CAB39	230712842	K562	FALSE
chr2	233857445	233858169	ENSG00000188042	ARL4C	234497081	K562	FALSE
chr2	234544935	234545293	ENSG00000188042	ARL4C	234497081	K562	FALSE
chr2	234544935	234545293	ENSG00000157985	AGAP1	235494089	K562	FALSE
chr2	235444324	235444584	ENSG00000188042	ARL4C	234497081	K562	FALSE
chr2	235444324	235444584	ENSG00000157985	AGAP1	235494089	K562	FALSE
chr2	235461743	235462018	ENSG00000188042	ARL4C	234497081	K562	FALSE
chr2	235461743	235462018	ENSG00000157985	AGAP1	235494089	K562	FALSE
chr2	235463952	235464185	ENSG00000188042	ARL4C	234497081	K562	FALSE
chr2	235463952	235464185	ENSG00000157985	AGAP1	235494089	K562	FALSE
chr2	237027535	237027681	ENSG00000184182	UBE2F	237966945	K562	FALSE
chr2	237940303	237940603	ENSG00000184182	UBE2F	237966945	K562	FALSE
chr2	237940303	237940603	ENSG00000065802	ASB1	238426742	K562	FALSE
chr2	237941890	237942402	ENSG00000184182	UBE2F	237966945	K562	FALSE
chr2	237941890	237942402	ENSG00000065802	ASB1	238426742	K562	FALSE
chr2	237963769	237963977	ENSG00000184182	UBE2F	237966945	K562	FALSE
chr2	237963769	237963977	ENSG00000065802	ASB1	238426742	K562	FALSE
chr2	238423704	238423858	ENSG00000184182	UBE2F	237966945	K562	FALSE
chr2	238423704	238423858	ENSG00000065802	ASB1	238426742	K562	FALSE
chr20	1033811	1033961	ENSG00000125826	RBCK1	407498	K562	FALSE
chr20	1033811	1033961	ENSG00000125898	FAM110A	833715	K562	FALSE
chr20	1212130	1212453	ENSG00000125826	RBCK1	407498	K562	FALSE
chr20	1212130	1212453	ENSG00000125898	FAM110A	833715	K562	FALSE
chr20	1215334	1215895	ENSG00000125826	RBCK1	407498	K562	FALSE
chr20	1215334	1215895	ENSG00000125898	FAM110A	833715	K562	FALSE
chr20	1415935	1416435	ENSG00000125898	FAM110A	833715	K562	FALSE
chr20	1434796	1435397	ENSG00000125898	FAM110A	833715	K562	FALSE
chr20	31590857	31591161	ENSG00000125968	ID1	31605283	K562	FALSE
chr20	31612728	31613290	ENSG00000125968	ID1	31605283	K562	FALSE
chr20	31661424	31662569	ENSG00000125968	ID1	31605283	K562	FALSE
chr20	45982924	45983742	ENSG00000158296	SLC13A3	46651459	K562	FALSE
chr20	46740222	46740520	ENSG00000158296	SLC13A3	46651459	K562	FALSE
chr20	46740222	46740520	ENSG00000101040	ZMYND8	47355657	K562	FALSE
chr20	47365018	47365368	ENSG00000158296	SLC13A3	46651459	K562	FALSE
chr20	47365018	47365368	ENSG00000101040	ZMYND8	47355657	K562	FALSE
chr20	47379713	47380207	ENSG00000158296	SLC13A3	46651459	K562	FALSE
chr20	47379713	47380207	ENSG00000101040	ZMYND8	47355657	K562	FALSE
chr20	48100596	48100782	ENSG00000101040	ZMYND8	47355657	K562	FALSE
chr20	48315240	48315442	ENSG00000101040	ZMYND8	47355657	K562	FALSE
chr20	49747822	49748249	ENSG00000124171	PARD6B	50731580	K562	FALSE
chr20	49765050	49765606	ENSG00000124171	PARD6B	50731580	K562	FALSE
chr20	49767196	49767356	ENSG00000124171	PARD6B	50731580	K562	FALSE
chr20	49775199	49775703	ENSG00000124171	PARD6B	50731580	K562	FALSE
chr20	49776228	49776700	ENSG00000124171	PARD6B	50731580	K562	FALSE
chr20	49785807	49786057	ENSG00000124171	PARD6B	50731580	K562	FALSE
chr20	49790191	49790742	ENSG00000124171	PARD6B	50731580	K562	FALSE
chr20	50012267	50013259	ENSG00000124171	PARD6B	50731580	K562	FALSE
chr20	50014218	50014380	ENSG00000124171	PARD6B	50731580	K562	FALSE
chr20	50020384	50020560	ENSG00000124171	PARD6B	50731580	K562	FALSE
chr20	50194070	50194278	ENSG00000124171	PARD6B	50731580	K562	FALSE
chr20	50195217	50195637	ENSG00000124171	PARD6B	50731580	K562	FALSE
chr20	50348162	50348437	ENSG00000124171	PARD6B	50731580	K562	FALSE
chr20	50433655	50434188	ENSG00000124171	PARD6B	50731580	K562	FALSE
chr20	50440687	50441223	ENSG00000124171	PARD6B	50731580	K562	FALSE
chr20	50441634	50442053	ENSG00000124171	PARD6B	50731580	K562	FALSE
chr20	50475834	50476212	ENSG00000124171	PARD6B	50731580	K562	FALSE
chr20	50478248	50478653	ENSG00000124171	PARD6B	50731580	K562	FALSE
chr20	50482431	50482947	ENSG00000124171	PARD6B	50731580	K562	FALSE
chr20	50483495	50483861	ENSG00000124171	PARD6B	50731580	K562	FALSE
chr20	50504251	50504525	ENSG00000124171	PARD6B	50731580	K562	FALSE
chr20	50724808	50725314	ENSG00000124171	PARD6B	50731580	K562	FALSE
chr20	50790475	50791248	ENSG00000124171	PARD6B	50731580	K562	FALSE
chr20	50987699	50988145	ENSG00000124171	PARD6B	50731580	K562	FALSE
chr20	51033773	51033998	ENSG00000124171	PARD6B	50731580	K562	FALSE
chr20	51195617	51195839	ENSG00000124171	PARD6B	50731580	K562	FALSE
chr20	51338568	51338983	ENSG00000124171	PARD6B	50731580	K562	FALSE
chr20	51339836	51340093	ENSG00000124171	PARD6B	50731580	K562	FALSE
chr20	51340525	51340769	ENSG00000124171	PARD6B	50731580	K562	FALSE
chr20	51373623	51374703	ENSG00000124171	PARD6B	50731580	K562	FALSE
chr20	51594922	51595501	ENSG00000124171	PARD6B	50731580	K562	FALSE
chr21	15249395	15249604	ENSG00000155307	SAMSN1	14546341	K562	FALSE
chr21	15249395	15249604	ENSG00000180530	NRIP1	15064934	K562	FALSE
chr21	42783693	42784145	ENSG00000160213	CSTB	43776238	K562	FALSE
chr21	42930049	42930383	ENSG00000160213	CSTB	43776238	K562	FALSE
chr21	42955719	42955987	ENSG00000160213	CSTB	43776238	K562	FALSE
chr21	42971874	42972607	ENSG00000160213	CSTB	43776238	K562	FALSE
chr21	43049826	43050169	ENSG00000160213	CSTB	43776238	K562	FALSE
chr21	43109035	43109452	ENSG00000160213	CSTB	43776238	K562	FALSE
chr21	43138956	43139376	ENSG00000160213	CSTB	43776238	K562	FALSE
chr21	43302659	43304497	ENSG00000160213	CSTB	43776238	K562	FALSE
chr21	43302659	43304497	ENSG00000141959	PFKL	44300053	K562	FALSE
chr21	43397765	43398826	ENSG00000160213	CSTB	43776238	K562	FALSE
chr21	43397765	43398826	ENSG00000141959	PFKL	44300053	K562	FALSE
chr21	43698492	43699160	ENSG00000160213	CSTB	43776238	K562	FALSE
chr21	43698492	43699160	ENSG00000141959	PFKL	44300053	K562	FALSE
chr21	43814888	43815724	ENSG00000160213	CSTB	43776238	K562	FALSE
chr21	43814888	43815724	ENSG00000141959	PFKL	44300053	K562	FALSE
chr21	44836443	44837039	ENSG00000141959	PFKL	44300053	K562	FALSE
chr21	44836443	44837039	ENSG00000182871	COL18A1	45405165	K562	FALSE
chr21	44878750	44879023	ENSG00000141959	PFKL	44300053	K562	FALSE
chr21	44878750	44879023	ENSG00000182871	COL18A1	45405165	K562	FALSE
chr21	44881047	44881116	ENSG00000141959	PFKL	44300053	K562	FALSE
chr21	44881047	44881116	ENSG00000182871	COL18A1	45405165	K562	FALSE
chr21	44987164	44988155	ENSG00000141959	PFKL	44300053	K562	FALSE
chr21	44987164	44988155	ENSG00000182871	COL18A1	45405165	K562	FALSE
chr21	45016676	45016910	ENSG00000141959	PFKL	44300053	K562	FALSE
chr21	45016676	45016910	ENSG00000182871	COL18A1	45405165	K562	FALSE
chr21	45036677	45036823	ENSG00000141959	PFKL	44300053	K562	FALSE
chr21	45036677	45036823	ENSG00000182871	COL18A1	45405165	K562	FALSE
chr21	45067278	45068224	ENSG00000141959	PFKL	44300053	K562	FALSE
chr21	45067278	45068224	ENSG00000182871	COL18A1	45405165	K562	FALSE
chr21	45326789	45327106	ENSG00000182871	COL18A1	45405165	K562	FALSE
chr21	45371745	45372127	ENSG00000182871	COL18A1	45405165	K562	FALSE
chr21	45391499	45391865	ENSG00000182871	COL18A1	45405165	K562	FALSE
chr21	45574360	45574465	ENSG00000182871	COL18A1	45405165	K562	FALSE
chr21	45947355	45947625	ENSG00000182871	COL18A1	45405165	K562	FALSE
chr21	46054827	46055191	ENSG00000182871	COL18A1	45405165	K562	FALSE
chr21	46455634	46456185	ENSG00000182871	COL18A1	45405165	K562	FALSE
chr22	18903640	18904725	ENSG00000070413	DGCR2	19122407	K562	FALSE
chr22	18903640	18904725	ENSG00000070371	CLTCL1	19291685	K562	FALSE
chr22	19554931	19555050	ENSG00000070413	DGCR2	19122407	K562	FALSE
chr22	19554931	19555050	ENSG00000070371	CLTCL1	19291685	K562	FALSE
chr22	19643462	19644595	ENSG00000070413	DGCR2	19122407	K562	FALSE
chr22	19643462	19644595	ENSG00000070371	CLTCL1	19291685	K562	FALSE
chr22	19727417	19727985	ENSG00000070413	DGCR2	19122407	K562	FALSE
chr22	19727417	19727985	ENSG00000070371	CLTCL1	19291685	K562	FALSE
chr22	19730135	19732080	ENSG00000070413	DGCR2	19122407	K562	FALSE
chr22	19730135	19732080	ENSG00000070371	CLTCL1	19291685	K562	FALSE
chr22	19741613	19743867	ENSG00000070413	DGCR2	19122407	K562	FALSE
chr22	19741613	19743867	ENSG00000070371	CLTCL1	19291685	K562	FALSE
chr22	20076668	20077067	ENSG00000070413	DGCR2	19122407	K562	FALSE
chr22	20076668	20077067	ENSG00000070371	CLTCL1	19291685	K562	FALSE
chr22	25740140	25740329	ENSG00000128294	TPST2	26590132	K562	FALSE
chr22	26404778	26405393	ENSG00000128294	TPST2	26590132	K562	FALSE
chr22	26406191	26406373	ENSG00000128294	TPST2	26590132	K562	FALSE
chr22	26619389	26619760	ENSG00000128294	TPST2	26590132	K562	FALSE
chr22	26642864	26643641	ENSG00000128294	TPST2	26590132	K562	FALSE
chr22	29204593	29204842	ENSG00000186998	EMID1	29205896	K562	FALSE
chr22	29303392	29303930	ENSG00000186998	EMID1	29205896	K562	FALSE
chr22	29780614	29781630	ENSG00000186998	EMID1	29205896	K562	FALSE
chr22	29840578	29840865	ENSG00000186998	EMID1	29205896	K562	FALSE
chr22	30249164	30249457	ENSG00000182541	LIMK2	31212239	K562	FALSE
chr22	30283382	30283617	ENSG00000182541	LIMK2	31212239	K562	FALSE
chr22	30431051	30431120	ENSG00000182541	LIMK2	31212239	K562	FALSE
chr22	31671042	31671237	ENSG00000182541	LIMK2	31212239	K562	FALSE
chr22	36052555	36053031	ENSG00000128309	MPST	37019635	K562	FALSE
chr22	36052555	36053031	ENSG00000128311	TST	37019467	K562	FALSE
chr22	36089088	36089463	ENSG00000128309	MPST	37019635	K562	FALSE
chr22	36089088	36089463	ENSG00000128311	TST	37019467	K562	FALSE
chr22	36123860	36124410	ENSG00000128309	MPST	37019635	K562	FALSE
chr22	36123860	36124410	ENSG00000128311	TST	37019467	K562	FALSE
chr22	36423416	36423865	ENSG00000128309	MPST	37019635	K562	FALSE
chr22	36423416	36423865	ENSG00000128311	TST	37019467	K562	FALSE
chr22	36430893	36431261	ENSG00000128309	MPST	37019635	K562	FALSE
chr22	36430893	36431261	ENSG00000128311	TST	37019467	K562	FALSE
chr22	37031323	37031505	ENSG00000128309	MPST	37019635	K562	FALSE
chr22	37031323	37031505	ENSG00000128311	TST	37019467	K562	FALSE
chr22	37031323	37031505	ENSG00000100097	LGALS1	37675636	K562	FALSE
chr22	37031323	37031505	ENSG00000128283	CDC42EP1	37560480	K562	FALSE
chr22	37031323	37031505	ENSG00000100116	GCAT	37807905	K562	FALSE
chr22	37046022	37046302	ENSG00000128309	MPST	37019635	K562	FALSE
chr22	37046022	37046302	ENSG00000128311	TST	37019467	K562	FALSE
chr22	37046022	37046302	ENSG00000100097	LGALS1	37675636	K562	FALSE
chr22	37046022	37046302	ENSG00000128283	CDC42EP1	37560480	K562	FALSE
chr22	37046022	37046302	ENSG00000100116	GCAT	37807905	K562	FALSE
chr22	37222112	37222233	ENSG00000128309	MPST	37019635	K562	FALSE
chr22	37222112	37222233	ENSG00000128311	TST	37019467	K562	FALSE
chr22	37222112	37222233	ENSG00000100097	LGALS1	37675636	K562	FALSE
chr22	37222112	37222233	ENSG00000128283	CDC42EP1	37560480	K562	FALSE
chr22	37222112	37222233	ENSG00000100116	GCAT	37807905	K562	FALSE
chr22	37258877	37259304	ENSG00000128309	MPST	37019635	K562	FALSE
chr22	37258877	37259304	ENSG00000128311	TST	37019467	K562	FALSE
chr22	37258877	37259304	ENSG00000100097	LGALS1	37675636	K562	FALSE
chr22	37258877	37259304	ENSG00000128283	CDC42EP1	37560480	K562	FALSE
chr22	37258877	37259304	ENSG00000100116	GCAT	37807905	K562	FALSE
chr22	37331911	37332152	ENSG00000128309	MPST	37019635	K562	FALSE
chr22	37331911	37332152	ENSG00000128311	TST	37019467	K562	FALSE
chr22	37331911	37332152	ENSG00000100097	LGALS1	37675636	K562	FALSE
chr22	37331911	37332152	ENSG00000128283	CDC42EP1	37560480	K562	FALSE
chr22	37331911	37332152	ENSG00000100116	GCAT	37807905	K562	FALSE
chr22	38285102	38285445	ENSG00000100097	LGALS1	37675636	K562	FALSE
chr22	38285102	38285445	ENSG00000128283	CDC42EP1	37560480	K562	FALSE
chr22	38285102	38285445	ENSG00000100116	GCAT	37807905	K562	FALSE
chr22	38461401	38461944	ENSG00000100097	LGALS1	37675636	K562	FALSE
chr22	38461401	38461944	ENSG00000128283	CDC42EP1	37560480	K562	FALSE
chr22	38461401	38461944	ENSG00000100116	GCAT	37807905	K562	FALSE
chr22	38461401	38461944	ENSG00000100321	SYNGR1	39349925	K562	FALSE
chr22	38461401	38461944	ENSG00000128268	MGAT3	39457012	K562	FALSE
chr22	38846784	38847389	ENSG00000100321	SYNGR1	39349925	K562	FALSE
chr22	38846784	38847389	ENSG00000128268	MGAT3	39457012	K562	FALSE
chr22	39273975	39274723	ENSG00000100321	SYNGR1	39349925	K562	FALSE
chr22	39273975	39274723	ENSG00000128268	MGAT3	39457012	K562	FALSE
chr22	39281337	39281518	ENSG00000100321	SYNGR1	39349925	K562	FALSE
chr22	39281337	39281518	ENSG00000128268	MGAT3	39457012	K562	FALSE
chr22	39282881	39284058	ENSG00000100321	SYNGR1	39349925	K562	FALSE
chr22	39282881	39284058	ENSG00000128268	MGAT3	39457012	K562	FALSE
chr22	39287464	39287587	ENSG00000100321	SYNGR1	39349925	K562	FALSE
chr22	39287464	39287587	ENSG00000128268	MGAT3	39457012	K562	FALSE
chr22	39343519	39343929	ENSG00000100321	SYNGR1	39349925	K562	FALSE
chr22	39343519	39343929	ENSG00000128268	MGAT3	39457012	K562	FALSE
chr22	39446163	39446650	ENSG00000100321	SYNGR1	39349925	K562	FALSE
chr22	39446163	39446650	ENSG00000128268	MGAT3	39457012	K562	FALSE
chr22	39557277	39557995	ENSG00000100321	SYNGR1	39349925	K562	FALSE
chr22	39557277	39557995	ENSG00000128268	MGAT3	39457012	K562	FALSE
chr22	39559647	39560276	ENSG00000100321	SYNGR1	39349925	K562	FALSE
chr22	39559647	39560276	ENSG00000128268	MGAT3	39457012	K562	FALSE
chr22	39723572	39724862	ENSG00000100321	SYNGR1	39349925	K562	FALSE
chr22	39723572	39724862	ENSG00000128268	MGAT3	39457012	K562	FALSE
chr22	39988259	39988935	ENSG00000100321	SYNGR1	39349925	K562	FALSE
chr22	39988259	39988935	ENSG00000128268	MGAT3	39457012	K562	FALSE
chr22	40651558	40652487	ENSG00000100393	EP300	41092592	K562	FALSE
chr22	40711531	40712014	ENSG00000100393	EP300	41092592	K562	FALSE
chr22	41412865	41413093	ENSG00000100393	EP300	41092592	K562	FALSE
chr22	41413380	41414625	ENSG00000100393	EP300	41092592	K562	FALSE
chr22	41448194	41448846	ENSG00000100393	EP300	41092592	K562	FALSE
chr22	41666563	41667233	ENSG00000100393	EP300	41092592	K562	FALSE
chr22	41667371	41667778	ENSG00000100393	EP300	41092592	K562	FALSE
chr22	41917733	41917819	ENSG00000100393	EP300	41092592	K562	FALSE
chr3	100590475	100590918	ENSG00000138468	SENP7	101513212	K562	FALSE
chr3	101142221	101142517	ENSG00000138468	SENP7	101513212	K562	FALSE
chr3	101148089	101148368	ENSG00000138468	SENP7	101513212	K562	FALSE
chr3	101518414	101518765	ENSG00000138468	SENP7	101513212	K562	FALSE
chr3	101634798	101634935	ENSG00000138468	SENP7	101513212	K562	FALSE
chr3	101635474	101635555	ENSG00000138468	SENP7	101513212	K562	FALSE
chr3	101636169	101636611	ENSG00000138468	SENP7	101513212	K562	FALSE
chr3	101637597	101637701	ENSG00000138468	SENP7	101513212	K562	FALSE
chr3	101642485	101642683	ENSG00000138468	SENP7	101513212	K562	FALSE
chr3	101868703	101869214	ENSG00000138468	SENP7	101513212	K562	FALSE
chr3	101938517	101938674	ENSG00000138468	SENP7	101513212	K562	FALSE
chr3	108099919	108100473	ENSG00000196776	CD47	108091025	K562	FALSE
chr3	108153446	108153725	ENSG00000196776	CD47	108091025	K562	FALSE
chr3	119695540	119695823	ENSG00000065518	NDUFB4	120596336	K562	FALSE
chr3	120559530	120559980	ENSG00000065518	NDUFB4	120596336	K562	FALSE
chr3	120623068	120623778	ENSG00000065518	NDUFB4	120596336	K562	FALSE
chr3	128421595	128421774	ENSG00000179348	GATA2	128493201	K562	FALSE
chr3	128424611	128425136	ENSG00000179348	GATA2	128493201	K562	FALSE
chr3	128425806	128427054	ENSG00000179348	GATA2	128493201	K562	FALSE
chr3	128427702	128427763	ENSG00000179348	GATA2	128493201	K562	FALSE
chr3	128505792	128506167	ENSG00000179348	GATA2	128493201	K562	FALSE
chr3	128521834	128522018	ENSG00000179348	GATA2	128493201	K562	FALSE
chr3	128532567	128533272	ENSG00000179348	GATA2	128493201	K562	FALSE
chr3	128547250	128548040	ENSG00000179348	GATA2	128493201	K562	FALSE
chr3	128548654	128549752	ENSG00000179348	GATA2	128493201	K562	FALSE
chr3	129054535	129055182	ENSG00000179348	GATA2	128493201	K562	FALSE
chr3	129056644	129057245	ENSG00000179348	GATA2	128493201	K562	FALSE
chr3	129195721	129196142	ENSG00000179348	GATA2	128493201	K562	FALSE
chr3	129211689	129212253	ENSG00000179348	GATA2	128493201	K562	FALSE
chr3	129226432	129226771	ENSG00000179348	GATA2	128493201	K562	FALSE
chr3	129228954	129229615	ENSG00000179348	GATA2	128493201	K562	FALSE
chr3	129327503	129327912	ENSG00000179348	GATA2	128493201	K562	FALSE
chr3	135513720	135514262	ENSG00000174579	MSL2	136196335	K562	FALSE
chr3	135581792	135582207	ENSG00000174579	MSL2	136196335	K562	FALSE
chr3	136786786	136787161	ENSG00000174579	MSL2	136196335	K562	FALSE
chr3	136787608	136787691	ENSG00000174579	MSL2	136196335	K562	FALSE
chr3	138862893	138863766	ENSG00000051382	PIK3CB	138834928	K562	FALSE
chr3	138912209	138912656	ENSG00000051382	PIK3CB	138834928	K562	FALSE
chr3	138915002	138916357	ENSG00000051382	PIK3CB	138834928	K562	FALSE
chr3	141629856	141630440	ENSG00000069849	ATP1B3	141876124	K562	FALSE
chr3	143168397	143168945	ENSG00000175040	CHST2	143119771	K562	FALSE
chr3	143170581	143170652	ENSG00000175040	CHST2	143119771	K562	FALSE
chr3	143170851	143170999	ENSG00000175040	CHST2	143119771	K562	FALSE
chr3	143183562	143183881	ENSG00000175040	CHST2	143119771	K562	FALSE
chr3	150253731	150253917	ENSG00000181788	SIAH2	150763169	K562	FALSE
chr3	150365114	150365622	ENSG00000181788	SIAH2	150763169	K562	FALSE
chr3	150469645	150470092	ENSG00000181788	SIAH2	150763169	K562	FALSE
chr3	150495718	150495824	ENSG00000181788	SIAH2	150763169	K562	FALSE
chr3	150498135	150498272	ENSG00000181788	SIAH2	150763169	K562	FALSE
chr3	150725604	150725843	ENSG00000181788	SIAH2	150763169	K562	FALSE
chr3	150726891	150727195	ENSG00000181788	SIAH2	150763169	K562	FALSE
chr3	150727687	150728250	ENSG00000181788	SIAH2	150763169	K562	FALSE
chr3	150738325	150738795	ENSG00000181788	SIAH2	150763169	K562	FALSE
chr3	150787787	150788135	ENSG00000181788	SIAH2	150763169	K562	FALSE
chr3	151504676	151504952	ENSG00000181788	SIAH2	150763169	K562	FALSE
chr3	151630961	151631462	ENSG00000181788	SIAH2	150763169	K562	FALSE
chr3	151674056	151674513	ENSG00000181788	SIAH2	150763169	K562	FALSE
chr3	151726068	151726419	ENSG00000181788	SIAH2	150763169	K562	FALSE
chr3	152108961	152109438	ENSG00000169860	P2RY1	152835131	K562	FALSE
chr3	152205141	152205259	ENSG00000169860	P2RY1	152835131	K562	FALSE
chr3	152205398	152205586	ENSG00000169860	P2RY1	152835131	K562	FALSE
chr3	152235981	152236225	ENSG00000169860	P2RY1	152835131	K562	FALSE
chr3	152574532	152574779	ENSG00000169860	P2RY1	152835131	K562	FALSE
chr3	152591515	152591791	ENSG00000169860	P2RY1	152835131	K562	FALSE
chr3	152596075	152596578	ENSG00000169860	P2RY1	152835131	K562	FALSE
chr3	152656856	152656929	ENSG00000169860	P2RY1	152835131	K562	FALSE
chr3	152818058	152818358	ENSG00000169860	P2RY1	152835131	K562	FALSE
chr3	152849974	152850456	ENSG00000169860	P2RY1	152835131	K562	FALSE
chr3	152961318	152961502	ENSG00000169860	P2RY1	152835131	K562	FALSE
chr3	153023955	153024303	ENSG00000169860	P2RY1	152835131	K562	FALSE
chr3	153029357	153029747	ENSG00000169860	P2RY1	152835131	K562	FALSE
chr3	153043041	153043396	ENSG00000169860	P2RY1	152835131	K562	FALSE
chr3	153051105	153051207	ENSG00000169860	P2RY1	152835131	K562	FALSE
chr3	153051375	153051820	ENSG00000169860	P2RY1	152835131	K562	FALSE
chr3	153051967	153052383	ENSG00000169860	P2RY1	152835131	K562	FALSE
chr3	153080746	153081147	ENSG00000169860	P2RY1	152835131	K562	FALSE
chr3	153221667	153222247	ENSG00000169860	P2RY1	152835131	K562	FALSE
chr3	153284393	153284607	ENSG00000169860	P2RY1	152835131	K562	FALSE
chr3	153289387	153289776	ENSG00000169860	P2RY1	152835131	K562	FALSE
chr3	153291180	153291341	ENSG00000169860	P2RY1	152835131	K562	FALSE
chr3	156558416	156558729	ENSG00000197415	VEPH1	157503339	K562	FALSE
chr3	156579365	156579983	ENSG00000197415	VEPH1	157503339	K562	FALSE
chr3	156599655	156599747	ENSG00000197415	VEPH1	157503339	K562	FALSE
chr3	156601462	156601603	ENSG00000197415	VEPH1	157503339	K562	FALSE
chr3	156604592	156605060	ENSG00000197415	VEPH1	157503339	K562	FALSE
chr3	156605579	156606465	ENSG00000197415	VEPH1	157503339	K562	FALSE
chr3	157128207	157128847	ENSG00000197415	VEPH1	157503339	K562	FALSE
chr3	167978172	167978407	ENSG00000173905	GOLIM4	168095924	K562	FALSE
chr3	168157148	168157762	ENSG00000173905	GOLIM4	168095924	K562	FALSE
chr3	171493053	171493389	ENSG00000154310	TNIK	171460405	K562	FALSE
chr3	171511426	171511737	ENSG00000154310	TNIK	171460405	K562	FALSE
chr3	171524020	171524536	ENSG00000154310	TNIK	171460405	K562	FALSE
chr3	171814001	171814509	ENSG00000154310	TNIK	171460405	K562	FALSE
chr3	171956703	171957085	ENSG00000154310	TNIK	171460405	K562	FALSE
chr3	171960853	171961343	ENSG00000154310	TNIK	171460405	K562	FALSE
chr3	171967185	171967528	ENSG00000154310	TNIK	171460405	K562	FALSE
chr3	171970434	171970774	ENSG00000154310	TNIK	171460405	K562	FALSE
chr3	171975581	171975808	ENSG00000154310	TNIK	171460405	K562	FALSE
chr3	171978046	171978175	ENSG00000154310	TNIK	171460405	K562	FALSE
chr3	171980538	171980828	ENSG00000154310	TNIK	171460405	K562	FALSE
chr3	172035217	172035379	ENSG00000154310	TNIK	171460405	K562	FALSE
chr3	172036630	172036850	ENSG00000154310	TNIK	171460405	K562	FALSE
chr3	179268491	179268818	ENSG00000136522	MRPL47	179604638	K562	FALSE
chr3	179304631	179304883	ENSG00000136522	MRPL47	179604638	K562	FALSE
chr3	182490709	182490858	ENSG00000058063	ATP11B	182793504	K562	FALSE
chr3	182704982	182705412	ENSG00000058063	ATP11B	182793504	K562	FALSE
chr3	182716084	182716412	ENSG00000058063	ATP11B	182793504	K562	FALSE
chr3	182726421	182726999	ENSG00000058063	ATP11B	182793504	K562	FALSE
chr3	182760738	182761167	ENSG00000058063	ATP11B	182793504	K562	FALSE
chr3	186882842	186883140	ENSG00000073849	ST6GAL1	186930325	K562	FALSE
chr3	186888481	186889056	ENSG00000073849	ST6GAL1	186930325	K562	FALSE
chr3	186909089	186909498	ENSG00000073849	ST6GAL1	186930325	K562	FALSE
chr3	187747979	187748369	ENSG00000073849	ST6GAL1	186930325	K562	FALSE
chr3	195458522	195458664	ENSG00000072274	TFRC	196055214	K562	FALSE
chr3	195458522	195458664	ENSG00000163958	ZDHHC19	196211400	K562	FALSE
chr3	195460348	195460731	ENSG00000072274	TFRC	196055214	K562	FALSE
chr3	195460348	195460731	ENSG00000163958	ZDHHC19	196211400	K562	FALSE
chr3	196108103	196108773	ENSG00000072274	TFRC	196055214	K562	FALSE
chr3	196108103	196108773	ENSG00000163958	ZDHHC19	196211400	K562	FALSE
chr3	196110416	196110800	ENSG00000072274	TFRC	196055214	K562	FALSE
chr3	196110416	196110800	ENSG00000163958	ZDHHC19	196211400	K562	FALSE
chr3	196122062	196122218	ENSG00000072274	TFRC	196055214	K562	FALSE
chr3	196122062	196122218	ENSG00000163958	ZDHHC19	196211400	K562	FALSE
chr3	196126946	196128047	ENSG00000072274	TFRC	196055214	K562	FALSE
chr3	196126946	196128047	ENSG00000163958	ZDHHC19	196211400	K562	FALSE
chr3	196140185	196140575	ENSG00000072274	TFRC	196055214	K562	FALSE
chr3	196140185	196140575	ENSG00000163958	ZDHHC19	196211400	K562	FALSE
chr3	196141151	196141292	ENSG00000072274	TFRC	196055214	K562	FALSE
chr3	196141151	196141292	ENSG00000163958	ZDHHC19	196211400	K562	FALSE
chr3	196183441	196183909	ENSG00000072274	TFRC	196055214	K562	FALSE
chr3	196183441	196183909	ENSG00000163958	ZDHHC19	196211400	K562	FALSE
chr3	196519006	196519498	ENSG00000072274	TFRC	196055214	K562	FALSE
chr3	196519006	196519498	ENSG00000163958	ZDHHC19	196211400	K562	FALSE
chr3	196522635	196522994	ENSG00000072274	TFRC	196055214	K562	FALSE
chr3	196522635	196522994	ENSG00000163958	ZDHHC19	196211400	K562	FALSE
chr3	196612029	196612524	ENSG00000072274	TFRC	196055214	K562	FALSE
chr3	196612029	196612524	ENSG00000163958	ZDHHC19	196211400	K562	FALSE
chr3	196633972	196634259	ENSG00000072274	TFRC	196055214	K562	FALSE
chr3	196633972	196634259	ENSG00000163958	ZDHHC19	196211400	K562	FALSE
chr3	196842649	196843100	ENSG00000072274	TFRC	196055214	K562	FALSE
chr3	196842649	196843100	ENSG00000163958	ZDHHC19	196211400	K562	FALSE
chr3	196970868	196971615	ENSG00000072274	TFRC	196055214	K562	FALSE
chr3	196970868	196971615	ENSG00000163958	ZDHHC19	196211400	K562	FALSE
chr4	10160386	10160588	ENSG00000178163	ZNF518B	10457426	K562	FALSE
chr4	10164875	10165198	ENSG00000178163	ZNF518B	10457426	K562	FALSE
chr4	10169951	10170153	ENSG00000178163	ZNF518B	10457426	K562	FALSE
chr4	10173279	10173809	ENSG00000178163	ZNF518B	10457426	K562	FALSE
chr4	10180636	10181765	ENSG00000178163	ZNF518B	10457426	K562	FALSE
chr4	10183149	10183335	ENSG00000178163	ZNF518B	10457426	K562	FALSE
chr4	10185704	10186182	ENSG00000178163	ZNF518B	10457426	K562	FALSE
chr4	10186698	10186985	ENSG00000178163	ZNF518B	10457426	K562	FALSE
chr4	10203847	10204346	ENSG00000178163	ZNF518B	10457426	K562	FALSE
chr4	109735765	109736156	ENSG00000170522	ELOVL6	110198653	K562	FALSE
chr4	109811021	109811262	ENSG00000170522	ELOVL6	110198653	K562	FALSE
chr4	121790913	121791348	ENSG00000181004	BBS12	122732702	K562	FALSE
chr4	121794440	121794974	ENSG00000181004	BBS12	122732702	K562	FALSE
chr4	121990413	121990931	ENSG00000181004	BBS12	122732702	K562	FALSE
chr4	121990413	121990931	ENSG00000138685	FGF2	122826708	K562	FALSE
chr4	121990413	121990931	ENSG00000145375	SPATA5	122923070	K562	FALSE
chr4	122117847	122117974	ENSG00000181004	BBS12	122732702	K562	FALSE
chr4	122117847	122117974	ENSG00000138685	FGF2	122826708	K562	FALSE
chr4	122117847	122117974	ENSG00000145375	SPATA5	122923070	K562	FALSE
chr4	122364972	122365394	ENSG00000181004	BBS12	122732702	K562	FALSE
chr4	122364972	122365394	ENSG00000138685	FGF2	122826708	K562	FALSE
chr4	122364972	122365394	ENSG00000145375	SPATA5	122923070	K562	FALSE
chr4	122480066	122480296	ENSG00000181004	BBS12	122732702	K562	FALSE
chr4	122480066	122480296	ENSG00000138685	FGF2	122826708	K562	FALSE
chr4	122480066	122480296	ENSG00000145375	SPATA5	122923070	K562	FALSE
chr4	122501162	122501239	ENSG00000181004	BBS12	122732702	K562	FALSE
chr4	122501162	122501239	ENSG00000138685	FGF2	122826708	K562	FALSE
chr4	122501162	122501239	ENSG00000145375	SPATA5	122923070	K562	FALSE
chr4	122576910	122577154	ENSG00000181004	BBS12	122732702	K562	FALSE
chr4	122576910	122577154	ENSG00000138685	FGF2	122826708	K562	FALSE
chr4	122576910	122577154	ENSG00000145375	SPATA5	122923070	K562	FALSE
chr4	122602497	122603001	ENSG00000181004	BBS12	122732702	K562	FALSE
chr4	122602497	122603001	ENSG00000138685	FGF2	122826708	K562	FALSE
chr4	122602497	122603001	ENSG00000145375	SPATA5	122923070	K562	FALSE
chr4	122603278	122603562	ENSG00000181004	BBS12	122732702	K562	FALSE
chr4	122603278	122603562	ENSG00000138685	FGF2	122826708	K562	FALSE
chr4	122603278	122603562	ENSG00000145375	SPATA5	122923070	K562	FALSE
chr4	122700106	122700659	ENSG00000181004	BBS12	122732702	K562	FALSE
chr4	122700106	122700659	ENSG00000138685	FGF2	122826708	K562	FALSE
chr4	122700106	122700659	ENSG00000145375	SPATA5	122923070	K562	FALSE
chr4	122765853	122765983	ENSG00000181004	BBS12	122732702	K562	FALSE
chr4	122765853	122765983	ENSG00000138685	FGF2	122826708	K562	FALSE
chr4	122765853	122765983	ENSG00000145375	SPATA5	122923070	K562	FALSE
chr4	122766949	122767300	ENSG00000181004	BBS12	122732702	K562	FALSE
chr4	122766949	122767300	ENSG00000138685	FGF2	122826708	K562	FALSE
chr4	122766949	122767300	ENSG00000145375	SPATA5	122923070	K562	FALSE
chr4	122775009	122775423	ENSG00000181004	BBS12	122732702	K562	FALSE
chr4	122775009	122775423	ENSG00000138685	FGF2	122826708	K562	FALSE
chr4	122775009	122775423	ENSG00000145375	SPATA5	122923070	K562	FALSE
chr4	122775823	122776590	ENSG00000181004	BBS12	122732702	K562	FALSE
chr4	122775823	122776590	ENSG00000138685	FGF2	122826708	K562	FALSE
chr4	122775823	122776590	ENSG00000145375	SPATA5	122923070	K562	FALSE
chr4	122803649	122804170	ENSG00000181004	BBS12	122732702	K562	FALSE
chr4	122803649	122804170	ENSG00000138685	FGF2	122826708	K562	FALSE
chr4	122803649	122804170	ENSG00000145375	SPATA5	122923070	K562	FALSE
chr4	123349283	123349824	ENSG00000181004	BBS12	122732702	K562	FALSE
chr4	123349283	123349824	ENSG00000138685	FGF2	122826708	K562	FALSE
chr4	123349283	123349824	ENSG00000145375	SPATA5	122923070	K562	FALSE
chr4	123350081	123350554	ENSG00000181004	BBS12	122732702	K562	FALSE
chr4	123350081	123350554	ENSG00000138685	FGF2	122826708	K562	FALSE
chr4	123350081	123350554	ENSG00000145375	SPATA5	122923070	K562	FALSE
chr4	123416133	123416306	ENSG00000181004	BBS12	122732702	K562	FALSE
chr4	123416133	123416306	ENSG00000138685	FGF2	122826708	K562	FALSE
chr4	123416133	123416306	ENSG00000145375	SPATA5	122923070	K562	FALSE
chr4	123444261	123444737	ENSG00000181004	BBS12	122732702	K562	FALSE
chr4	123444261	123444737	ENSG00000138685	FGF2	122826708	K562	FALSE
chr4	123444261	123444737	ENSG00000145375	SPATA5	122923070	K562	FALSE
chr4	123564720	123565248	ENSG00000181004	BBS12	122732702	K562	FALSE
chr4	123564720	123565248	ENSG00000138685	FGF2	122826708	K562	FALSE
chr4	123564720	123565248	ENSG00000145375	SPATA5	122923070	K562	FALSE
chr4	123599904	123600418	ENSG00000181004	BBS12	122732702	K562	FALSE
chr4	123599904	123600418	ENSG00000138685	FGF2	122826708	K562	FALSE
[truncated: 6,331 more rows]
